# Supplementary material for: Evolution of natural lifespan variation and molecular strategies of extended lifespan in yeast
Source: eLife journal article supplement (doi:10.7554/elife.64860), 2021-11-09
Supplement: figures [file elife-64860-figures-v2.pdf]

---

## Figures and figure supplements

Evolution of natural lifespan variation and molecular strategies of extended lifespan in yeast

**Alaattin Kaya et al**

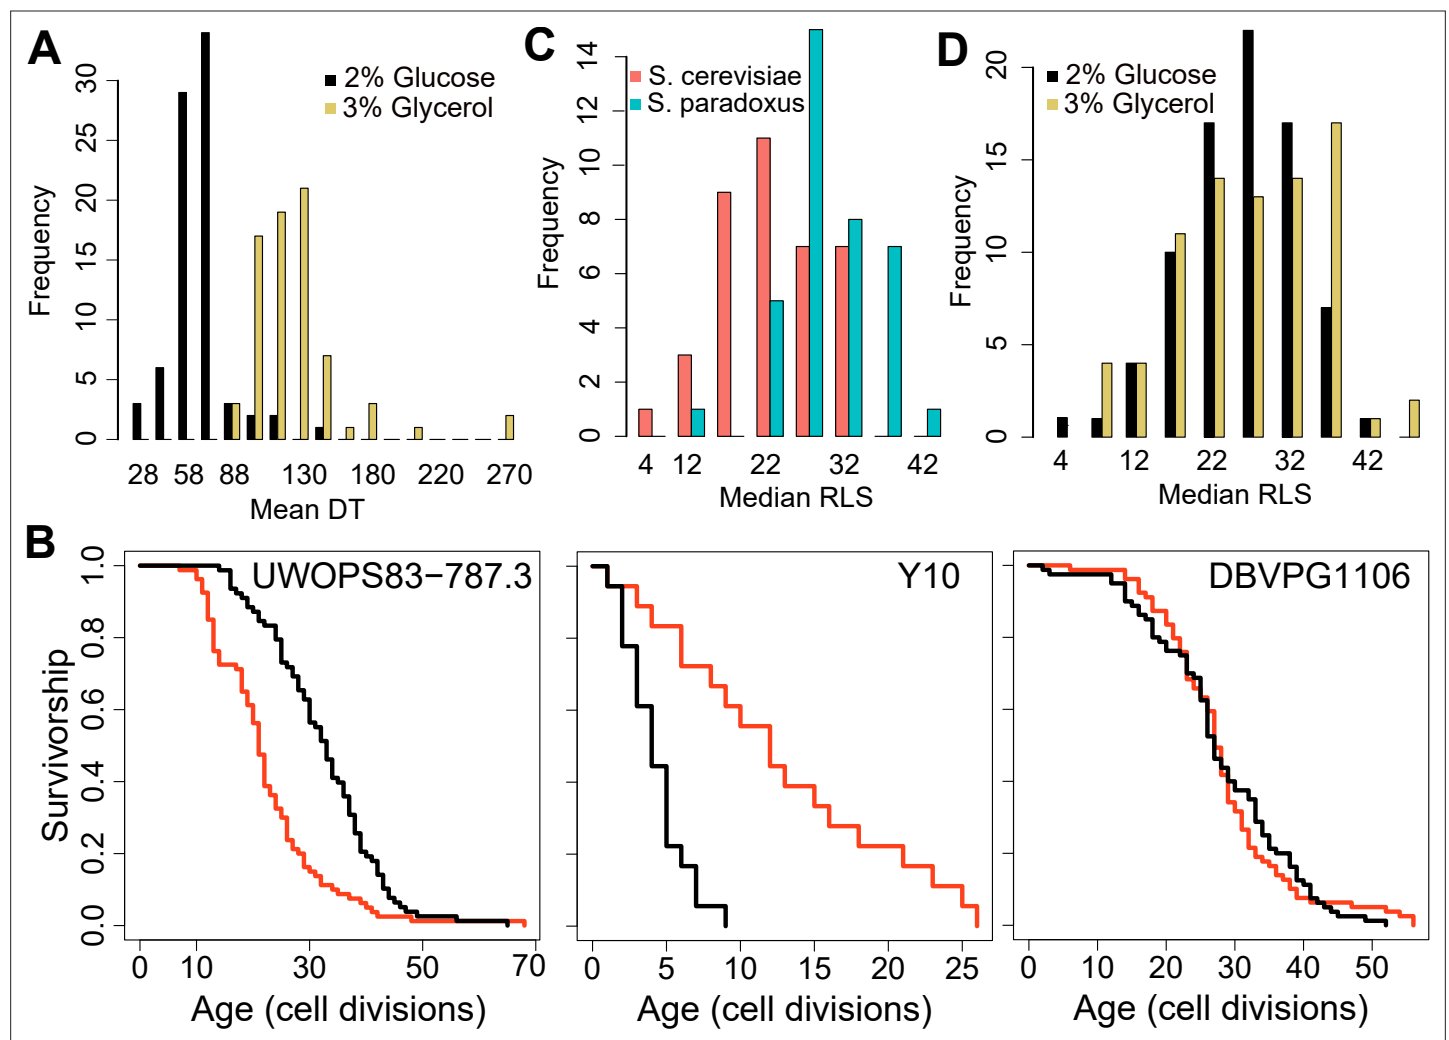

**Figure 1.** Doubling time and replicative lifespan of yeast wild isolates. **(A)** Distribution of mean doubling time (DT, in minutes) on yeast peptone dextrose (YPD; 2 % glucose) and yeast peptone glycerol (YPG; 3 % glycerol). **(B)** Examples of lifespan curves for the selected strains. Black curve shows lifespan under YPD conditions, and red curve under YPG conditions. **(C)** Median replicative lifespan (RLS) distribution across *S. cerevisiae* (red) and *S. paradoxus* (turquoise) isolates grown in YPD. **(D)** Distribution of median RLS across different conditions. Source data are provided as **Supplementary file 1**.

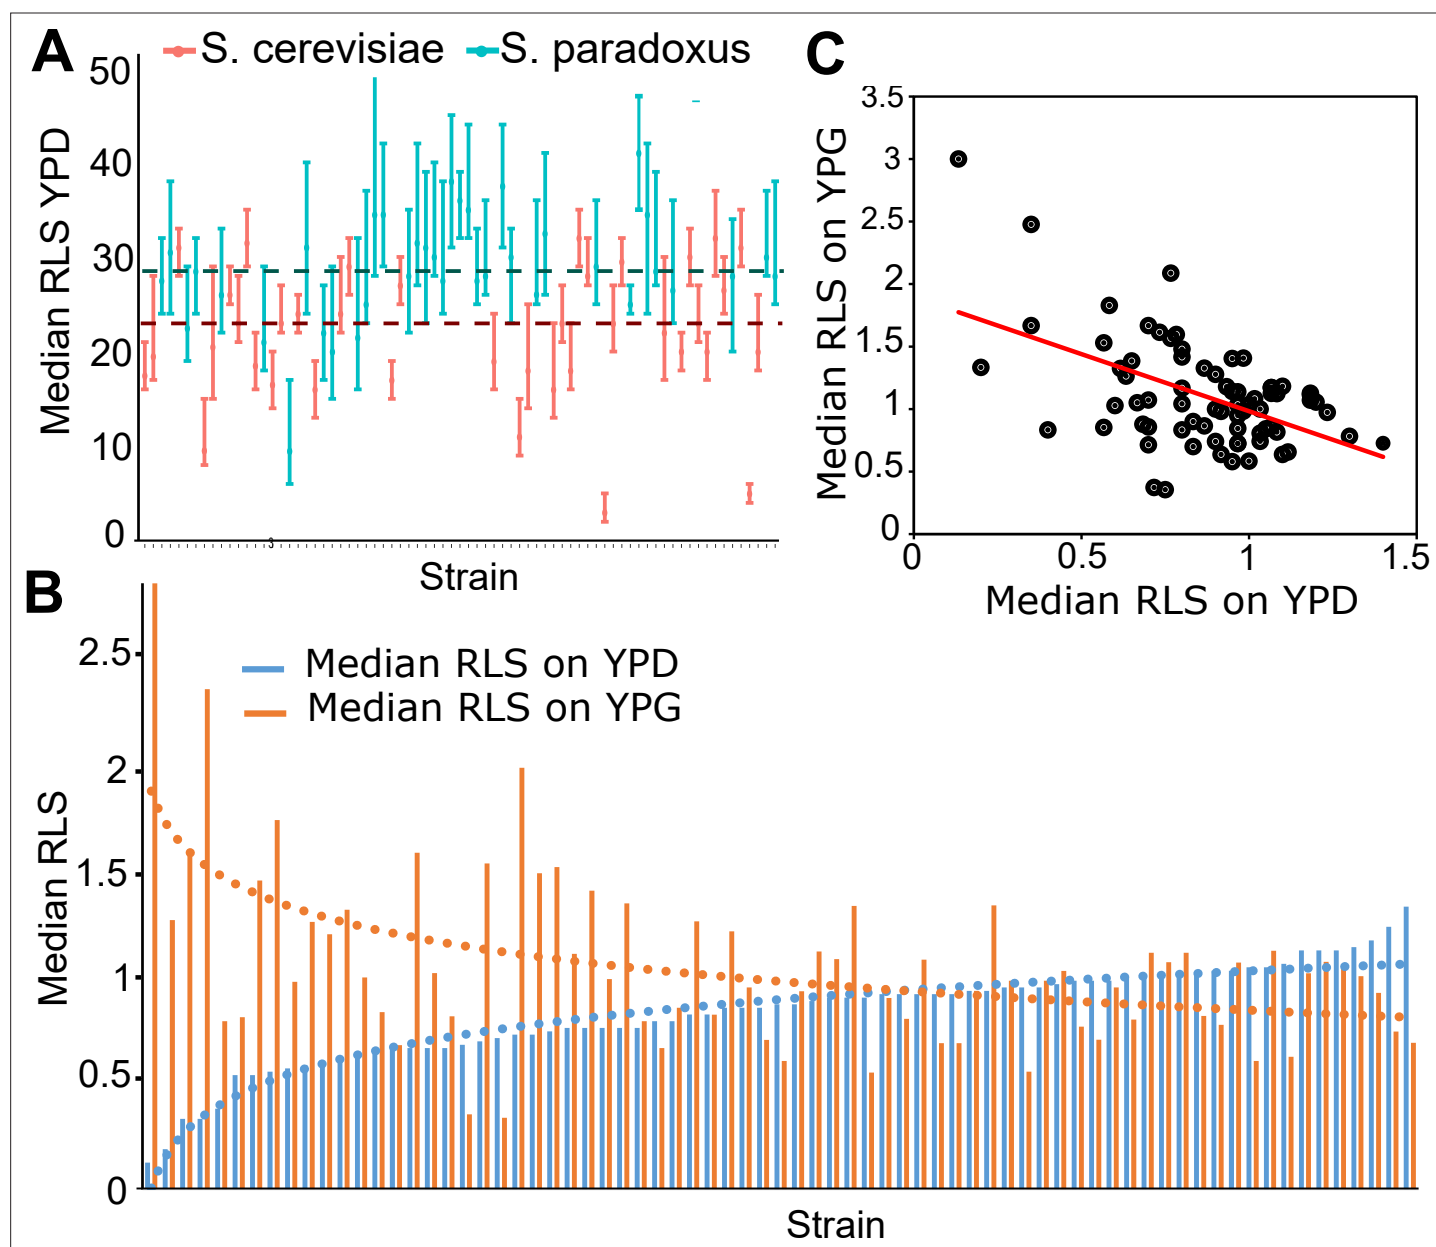

**Figure 1—figure supplement 1.** Replicative lifespan (RLS) phenotype across wild isolates. **(A)** Median RLS (error bars are the 95% confidence interval [CI] of the median lifespan) distribution across *S. cerevisiae* and *S. paradoxus* isolates grown in yeast peptone dextrose (YPD). Dashed lines represent average median RLS of *S. cerevisiae* (red) and *S. paradoxus* strains (turquoise). **(B)** Median RLS changes in YPD (glucose – blue) and yeast peptone glycerol (YPG; glycerol – orange) across wild isolates normalized against laboratory diploid wild type (WT) strain, BY4743 (median RLS  $\times$  strain/median RLS BY4743). Short-lived strains grown in YPD tend to have longer lifespan under YPG conditions, whereas long-lived strains grown in YPD tend to have shorter median RLS in YPG. **(C)** Significant negative correlation between median RLS YPD and median RLS YPG. (Corr. coefficient =  $-0.51$ ,  $p < 0.0001$ ).

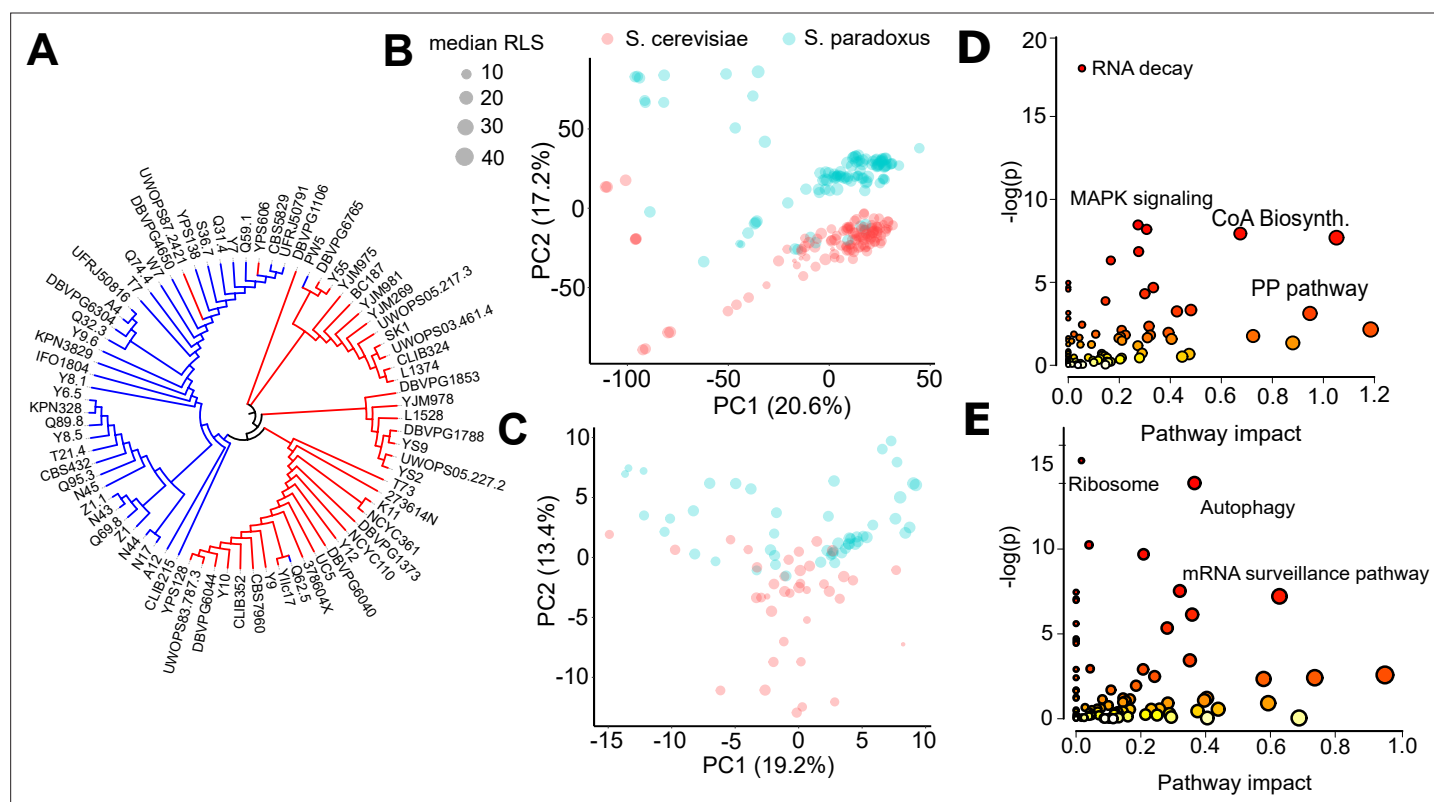

**Figure 2.** Endophenotypic variation across strains. (A) Phylogenetic relationship based on the transcriptome data of 76 strains of 2 species. Principal component analysis (PCA) of (B) transcriptomics and (C) metabolomics. Percent variance explained by each principal component (PC) is shown in parentheses. Pathway enrichment analysis for combined top genes and metabolites contributing to (D) PC1 and (E) PC2. Some of the enriched Kyoto Encyclopedia of Genes and Genomes (KEGG) pathways are shown in each panel. Source data are provided as **Supplementary file 3**.

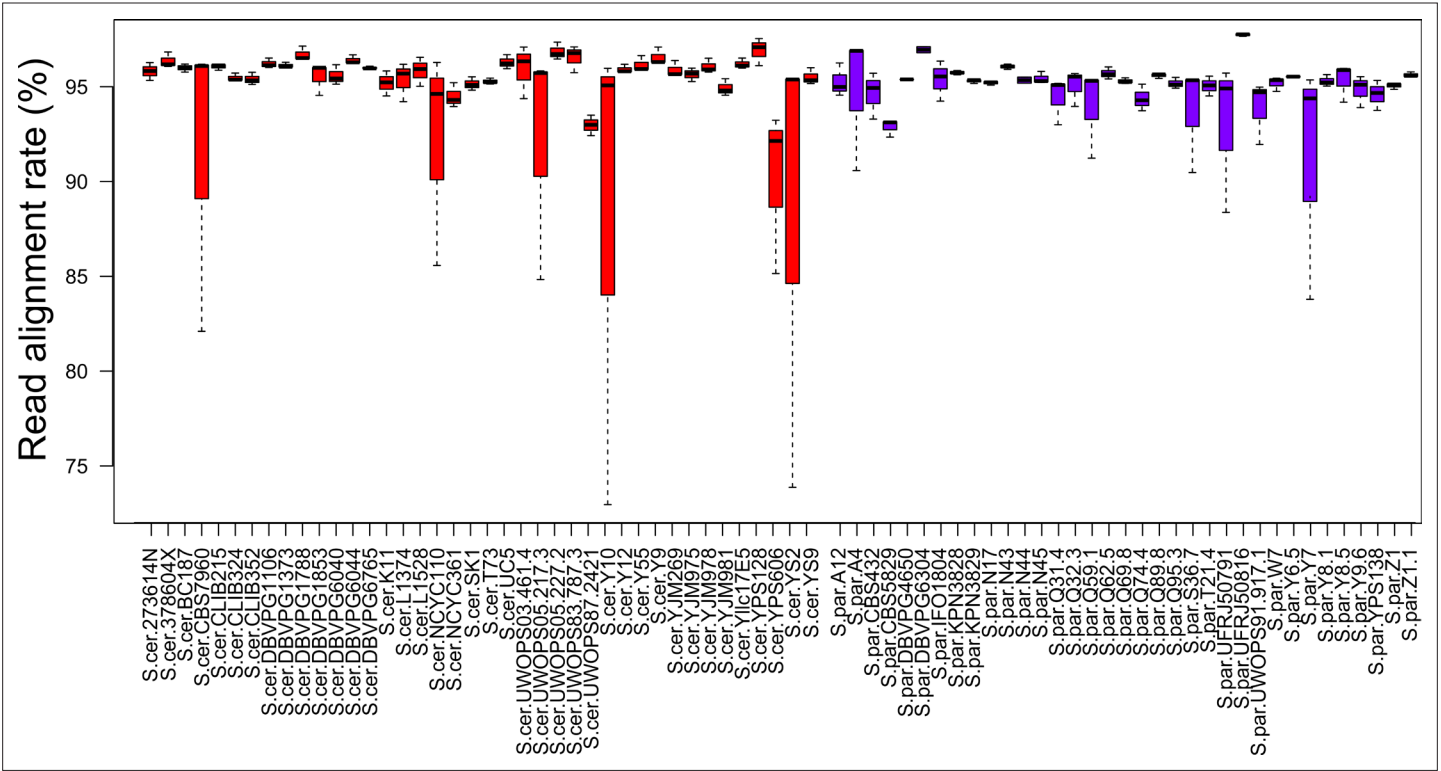

**Figure 2—figure supplement 1.** Read alignment rate for RNA-seq data. RNA-seq reads were mapped to the pseudo genome using STAR aligner software and mean value of alignment rate (three replicates per strain) from STAR outputs are shown here. Error bars show standard error of mean. Red bars indicate alignment rates for *S. cerevisiae* strains and purple bars indicate alignment rate for *S. paradoxus* strains.

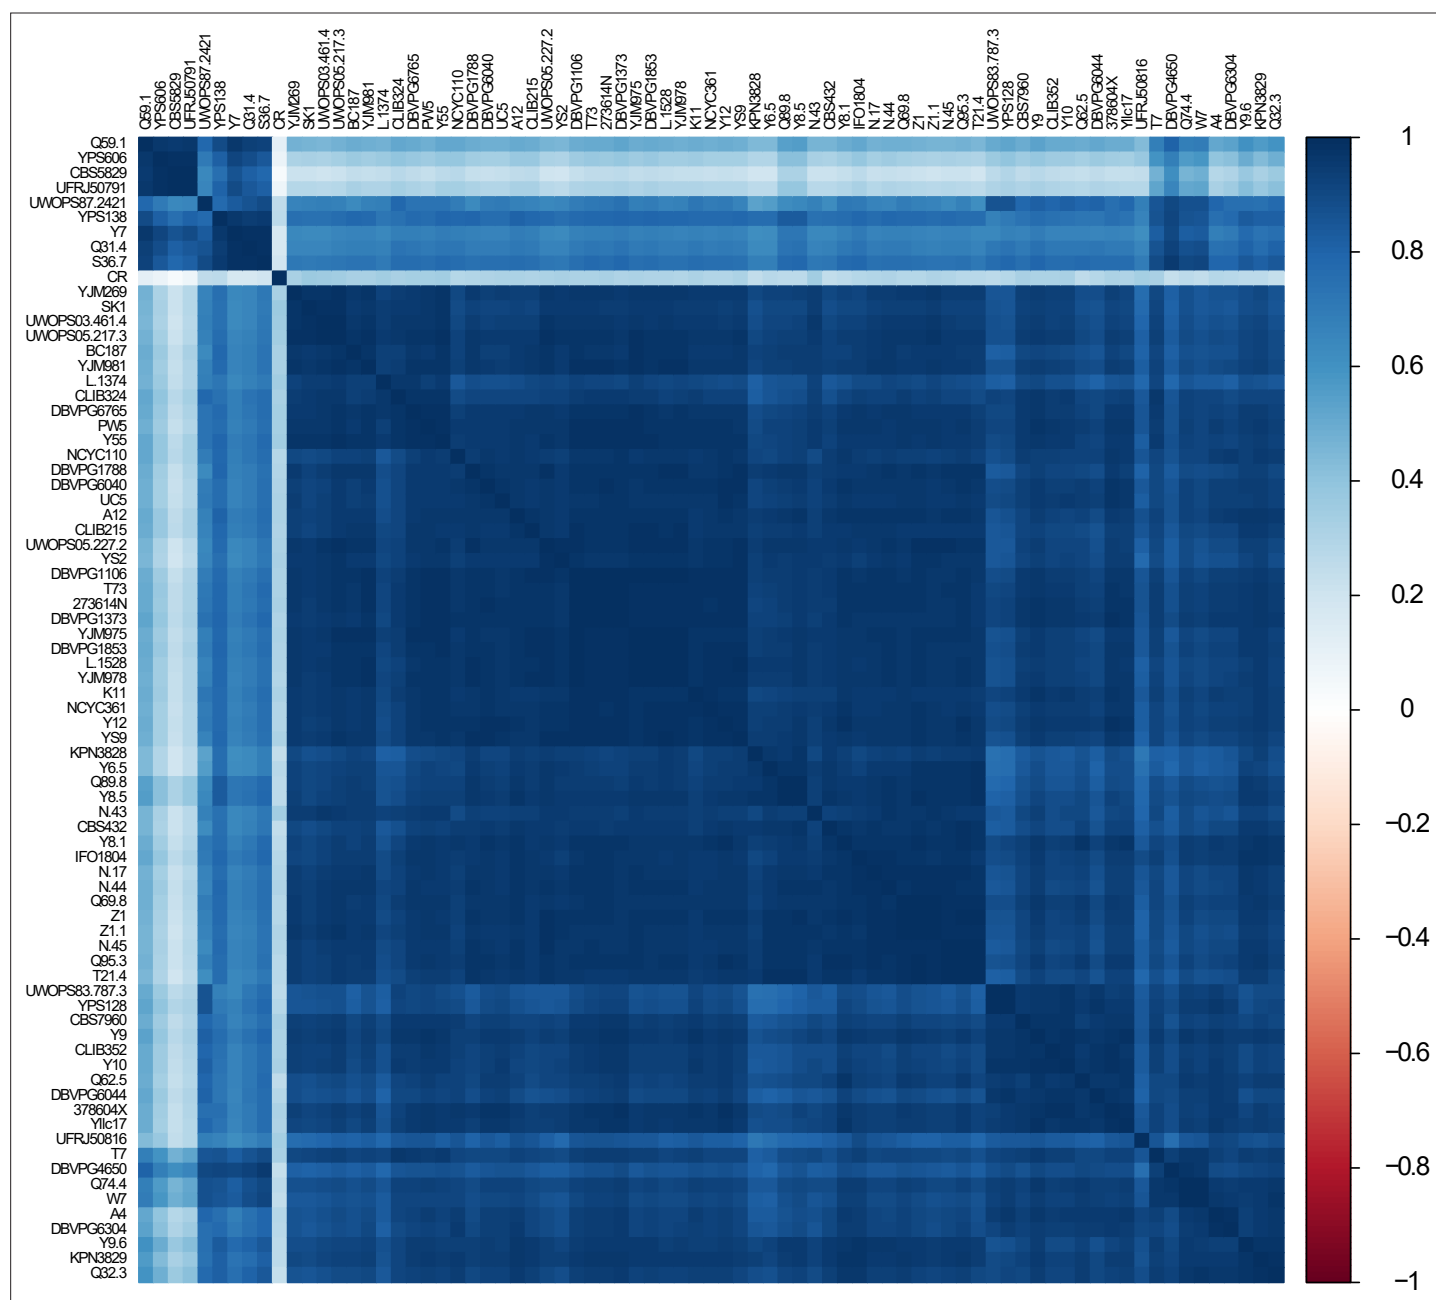

**Figure 2—figure supplement 2.** Correlation of genome-wide transcript levels across wild isolates. Heatmap shows pairwise, 1 – Pearson correlation matrix of gene expression data across wild isolates. Caloric restriction (CR) data were obtained from NCBI GEO (SRA: SRX403444) and placed into the analysis.

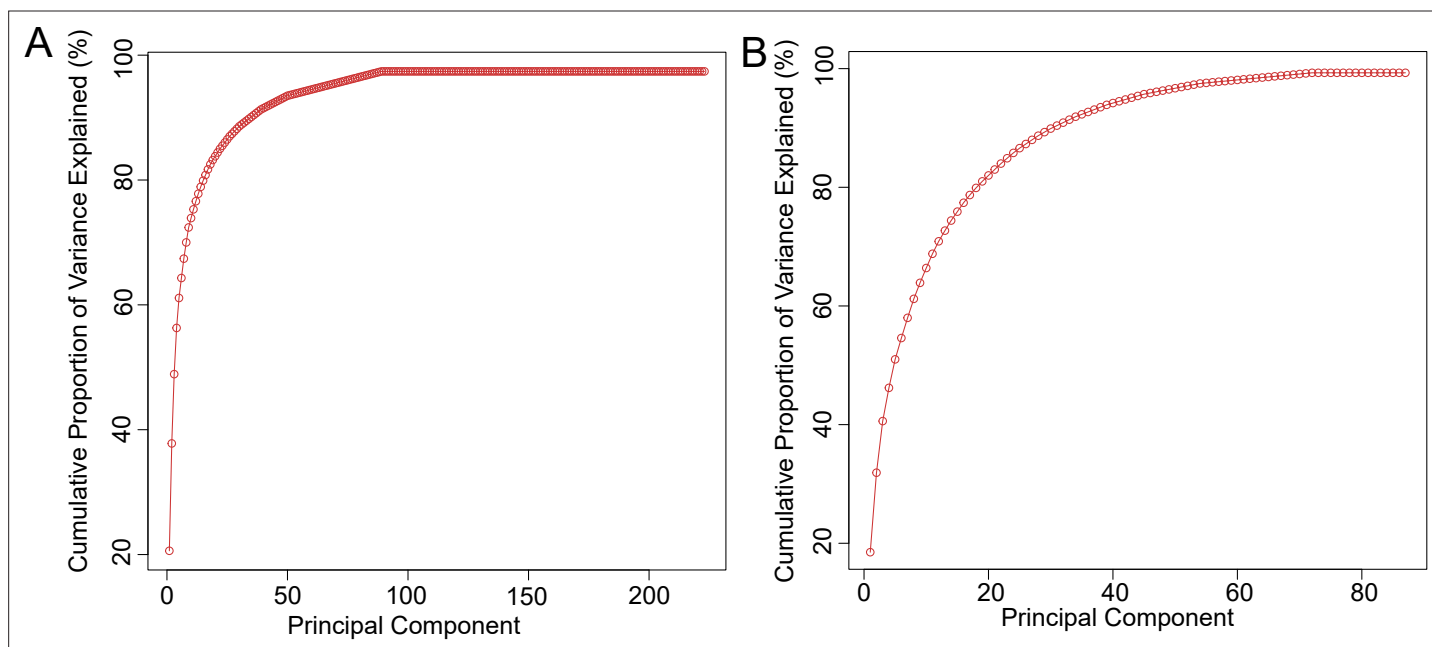

**Figure 2—figure supplement 3.** Principal component analysis. Graphs show cumulative percentage of variance explained by principal components for (A) genes and (B) metabolites.

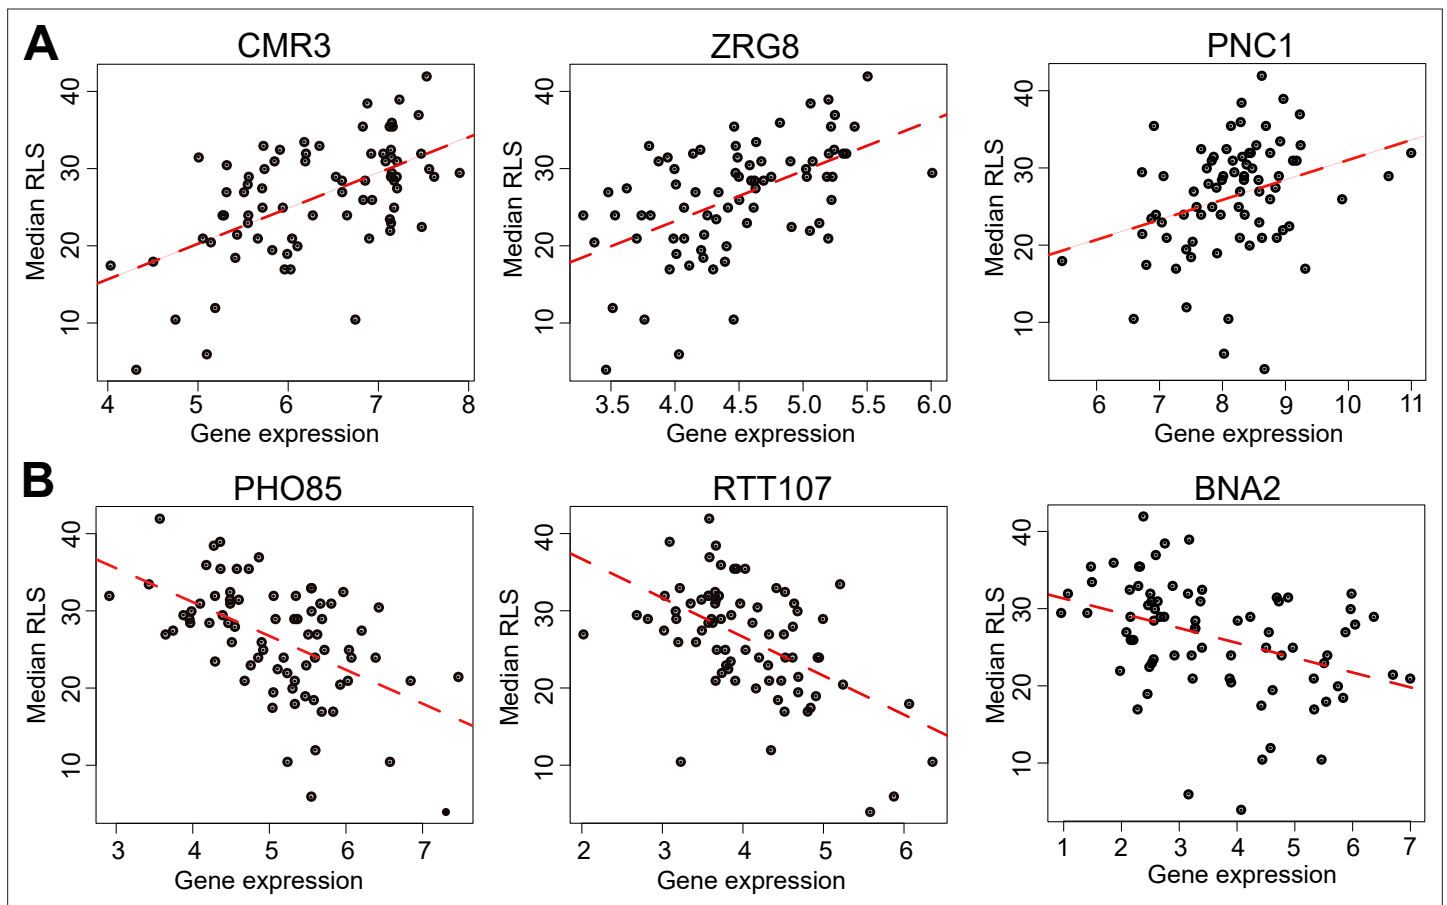

**Figure 3.** Selected genes whose expression correlates with median replicative lifespan (RLS). **(A)** Gene expression level (log2-cpm) of *CMR3*, *ZRG8*, and *PNC1* positively correlates with median RLS. **(B)** Transcript abundance of *PHO85*, *RTT107*, and *BNA2* negatively correlates with median RLS. Regression slope p values can be found in **Supplementary file 2**, which is also the source data file for these analyses.

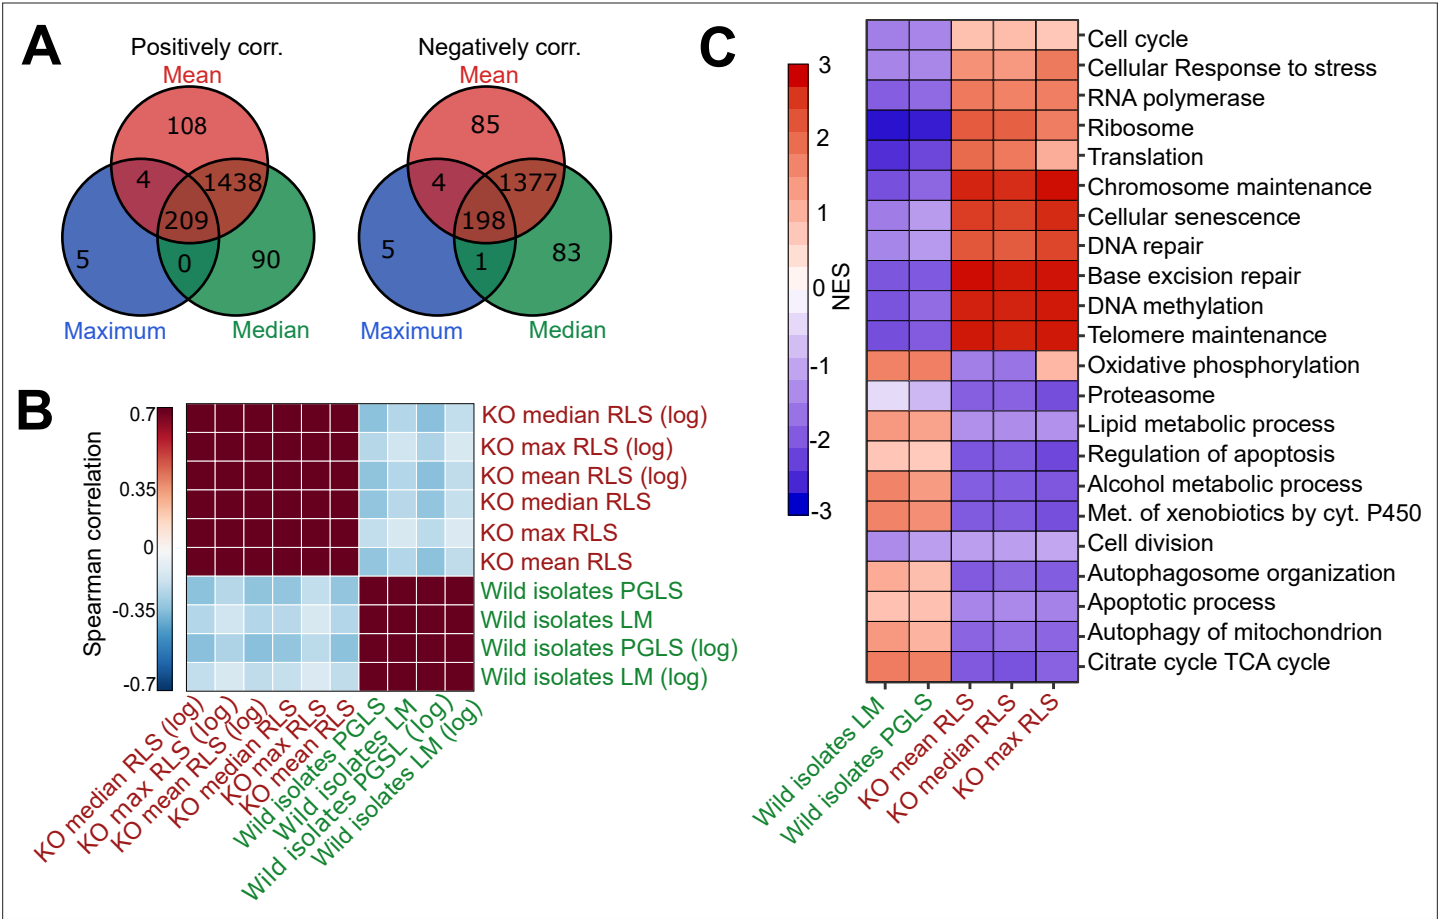

**Figure 4.** Comparative analysis of lab yeast knockout (KO) and wild isolates. **(A)** Significant genes ( $p_{adj} < 0.05$ ) associated with maximum, median, and mean replicative lifespan (RLS; or log maximum, median, and mean) across deletion strains based on transcriptomics data obtained from 1376 KO strains. Genes positively and negatively associated with RLS (upregulated and downregulated, respectively) are significantly shared across different metrics of RLS (Fisher's exact test,  $p < 0.05$ ). **(B)** Denoised correlation matrix of gene expression effects across single-gene deletion strains (KO), and those that we measure across the wild isolates that are associated with RLS. Correlation coefficient is calculated using union of top 1000 statistically significant genes for each pair of signatures with Spearman method. LM: linear model; PGLS: phylogenetic regression least squares. **(C)** Functional enrichment of genes associated with RLS across deletion and natural strains. Cells are colored based on normalized enrichment score (NES). **Supplementary files 1 and 2** are provided as source data files for these analyses.

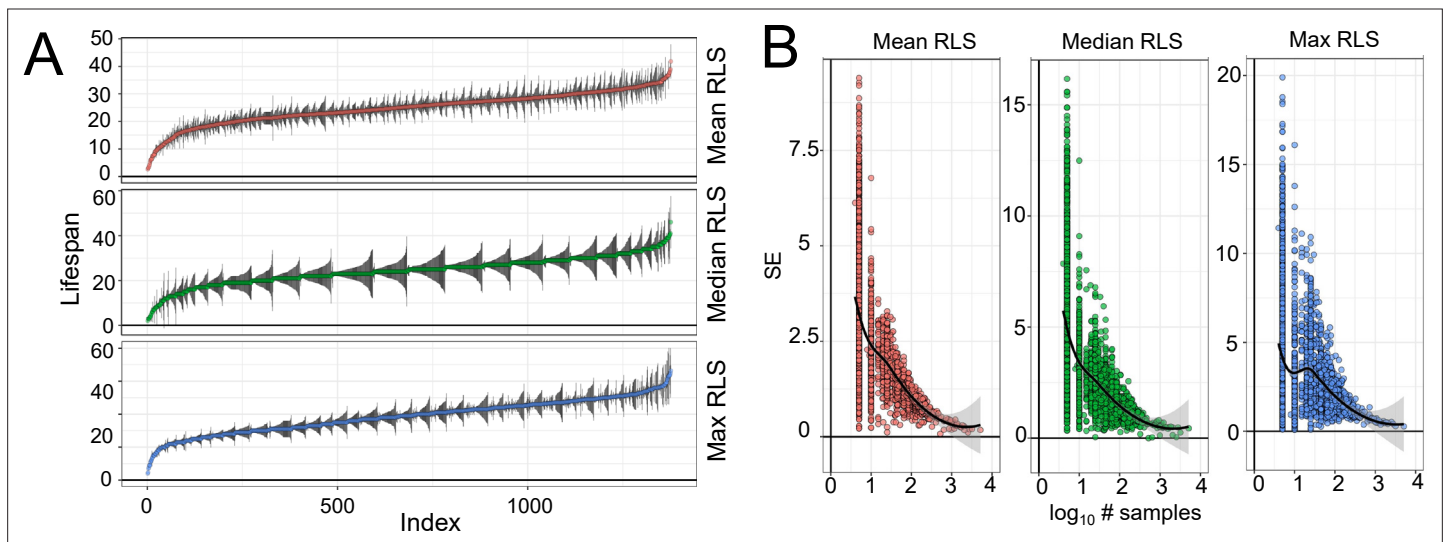

**Figure 4—figure supplement 1.** Replicative lifespan (RLS) phenotype of yeast knockout strains. **(A)** Distribution of mean, median, and maximum RLS across deletion strains with measured gene expression profile. RLS are sorted from the smallest to the greatest value. Black lines represent standard errors of the RLS estimates for corresponding strains. **(B)** Dependence of standard error of RLS estimate on the number of strains used for evaluation of deletion mutant lifespan. Raw RLS values are provided in **Supplementary file 1**.

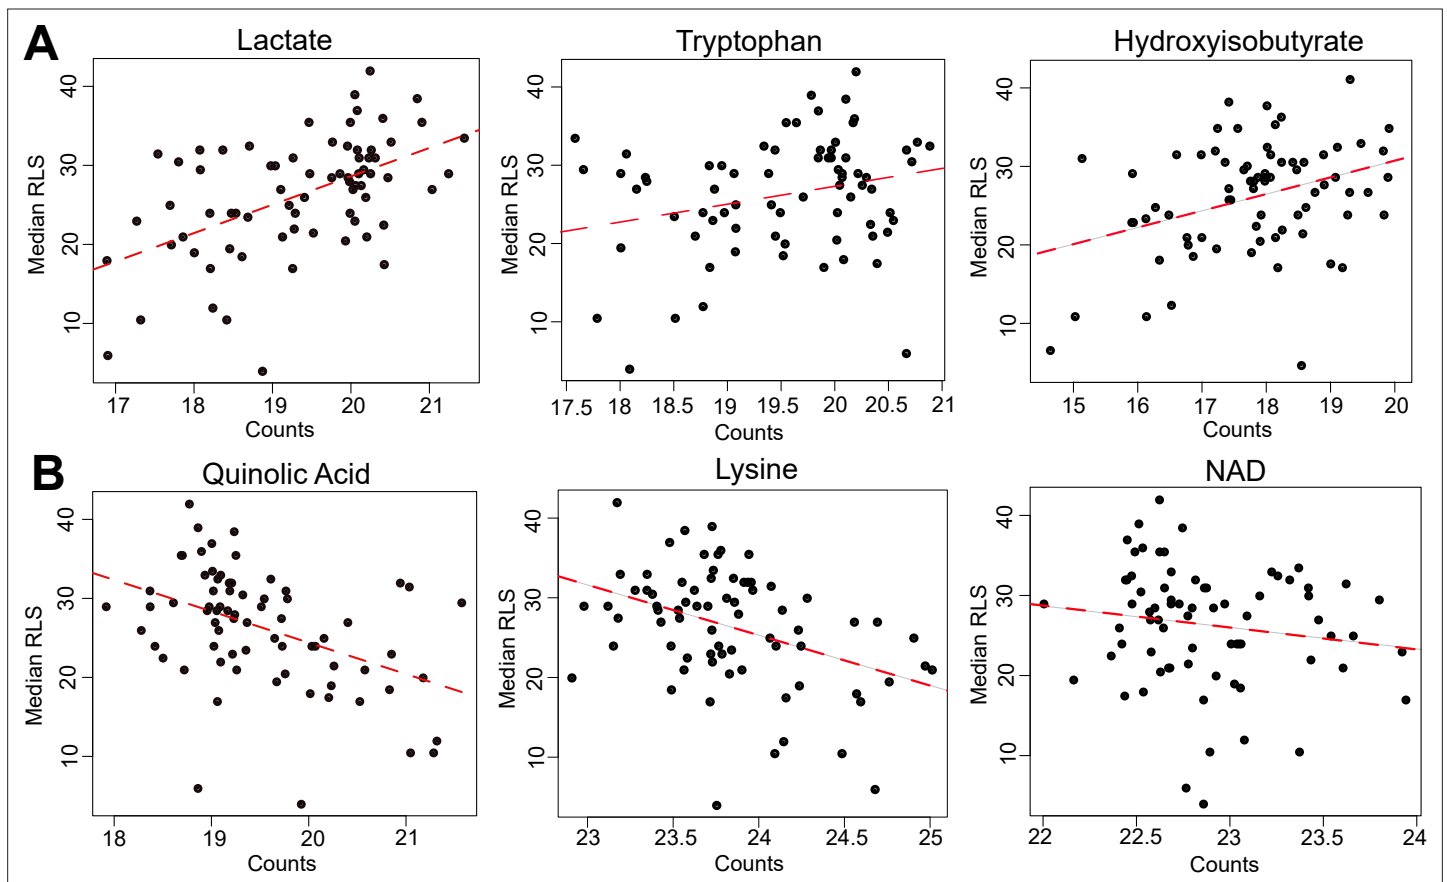

**Figure 5.** Selected metabolites correlating with median replicative lifespan (RLS). **(A)** Abundance (liquid chromatography–mass spectrometry [LC–MS] counts) of lactate, tryptophan (Trp), and hydroxyisobutyrate that positively correlate, and **(B)** abundance of quinolinic acid, lysine (Lys), and NAD that negatively correlate with median RLS. Regression slope p values can be found in **Supplementary file 2**. This file is also provided as a source data file for these analyses.

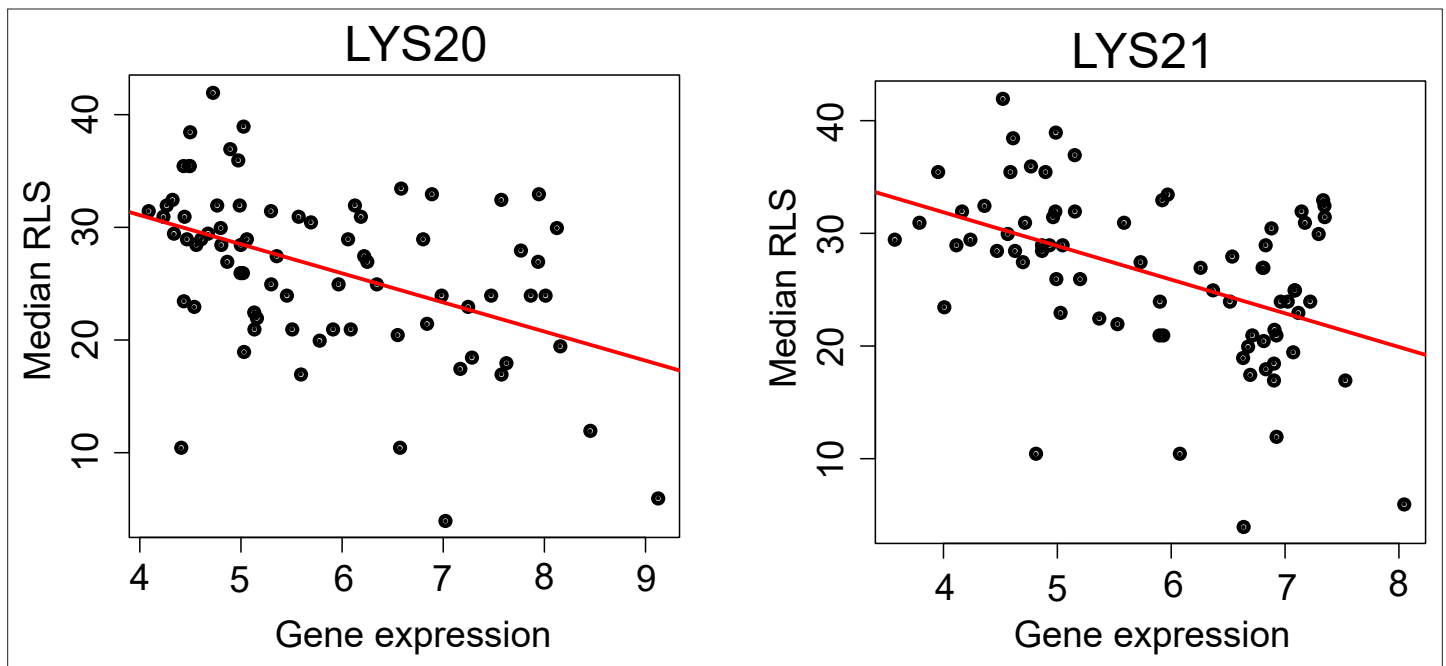

**Figure 5—figure supplement 1.** Correlation of LYS20 and LYS21 genes with median replicative lifespan (RLS). Gene expression level (log2-cpm) of *LYS20* and *LYS21* negatively correlates with median RLS. Regression slope p values can be found in **Supplementary file 2**.

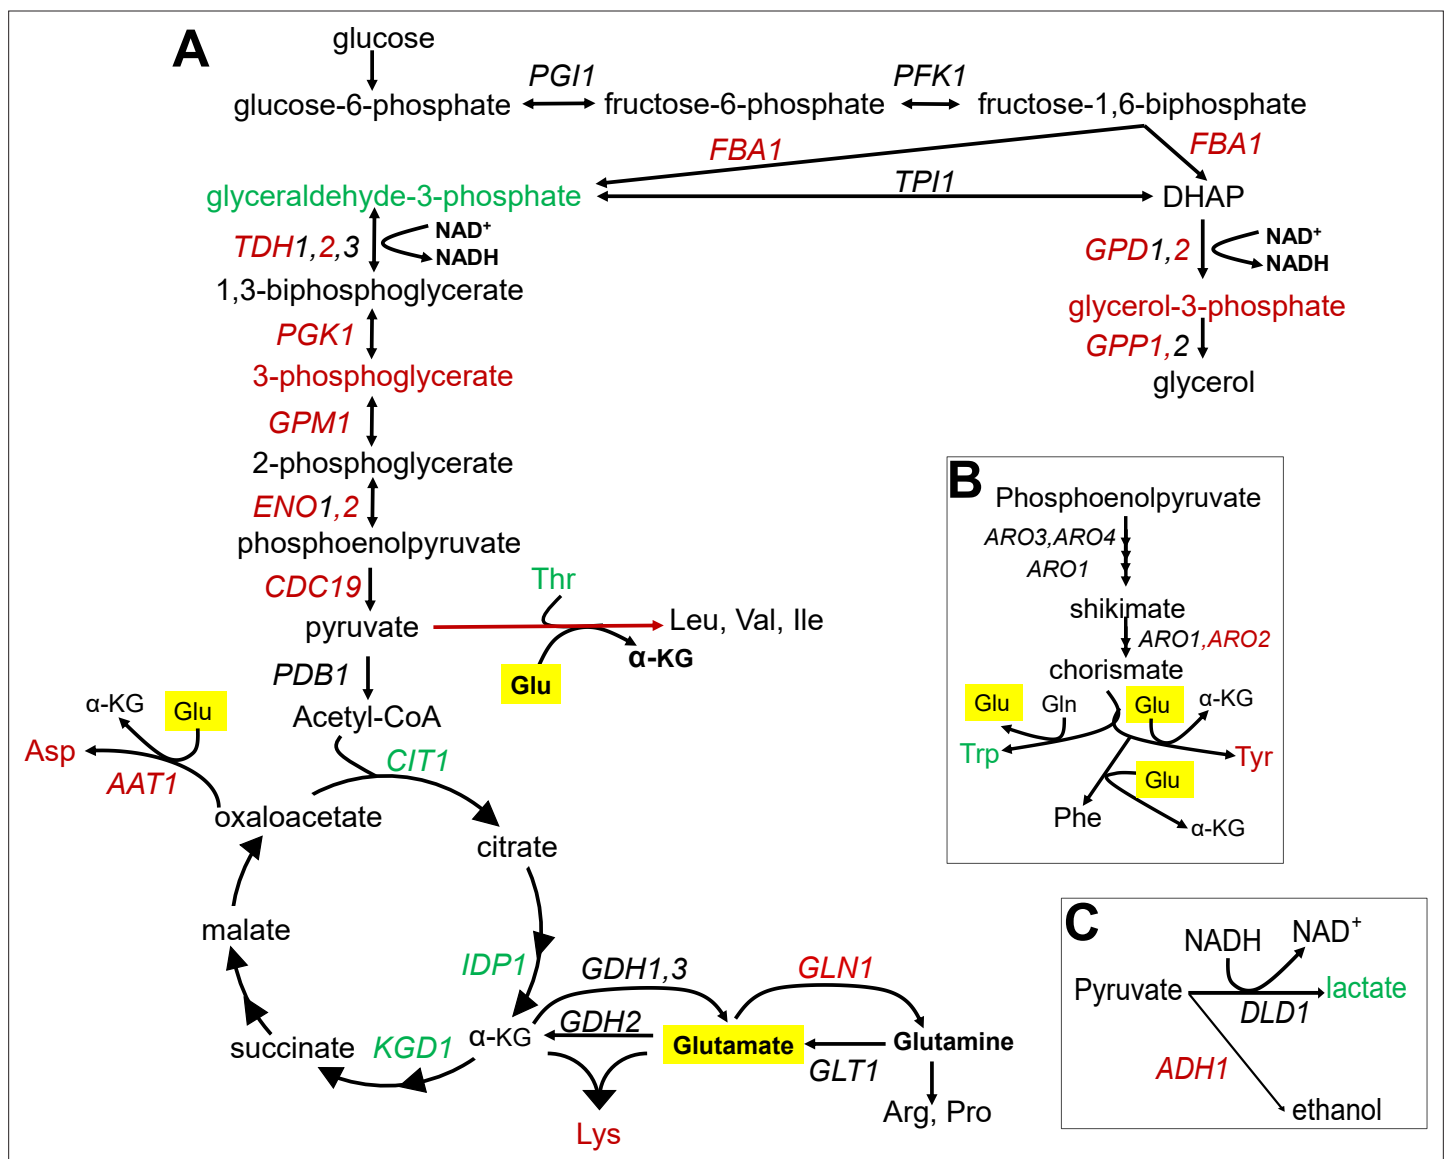

**Figure 6.** Summary of metabolic changes associated with replicative lifespan (RLS). **(A)** Summary depiction of genes and metabolites from the interconnected glycolytic pathway, TCA cycle and amino acid metabolism that are found to be associated with RLS. Associated genes are colored in red (negatively associated with RLS) or green (positively associated with RLS). Depiction of **(B)** shikimate pathway and **(C)** lactate and ethanol biosynthetic pathways are shown with the same color code representation. Glutamate is highlighted in yellow.

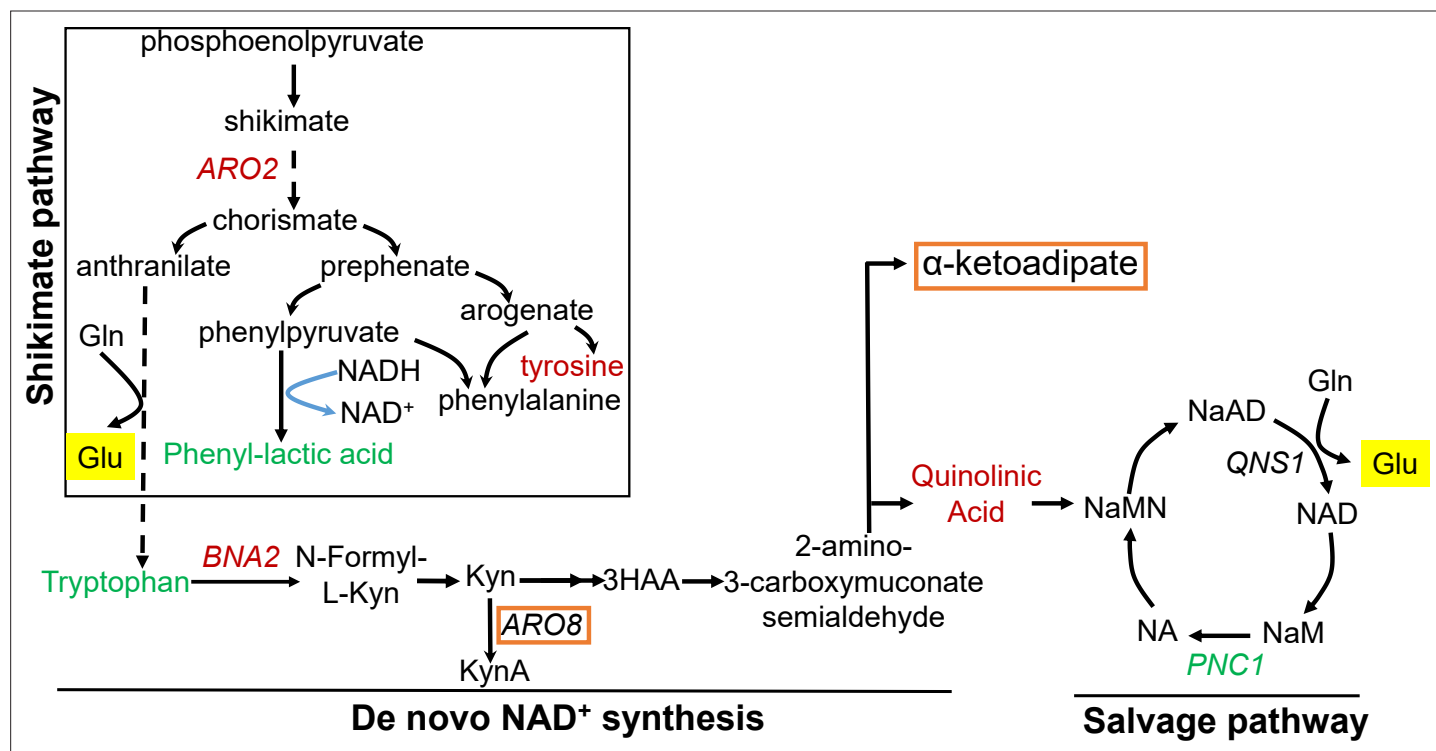

**Figure 6—figure supplement 1.** Genes and metabolites from shikimate, kynurenine, and salvage pathways associated with replicative lifespan (RLS). Genes and metabolites from each pathway that are found to be associated with RLS are colored with red (negatively associated with RLS) or green (positively associated with RLS). Genes and metabolites that are known to be involved in lysine metabolism are highlighted in orange box, and glutamate is highlighted in yellow.

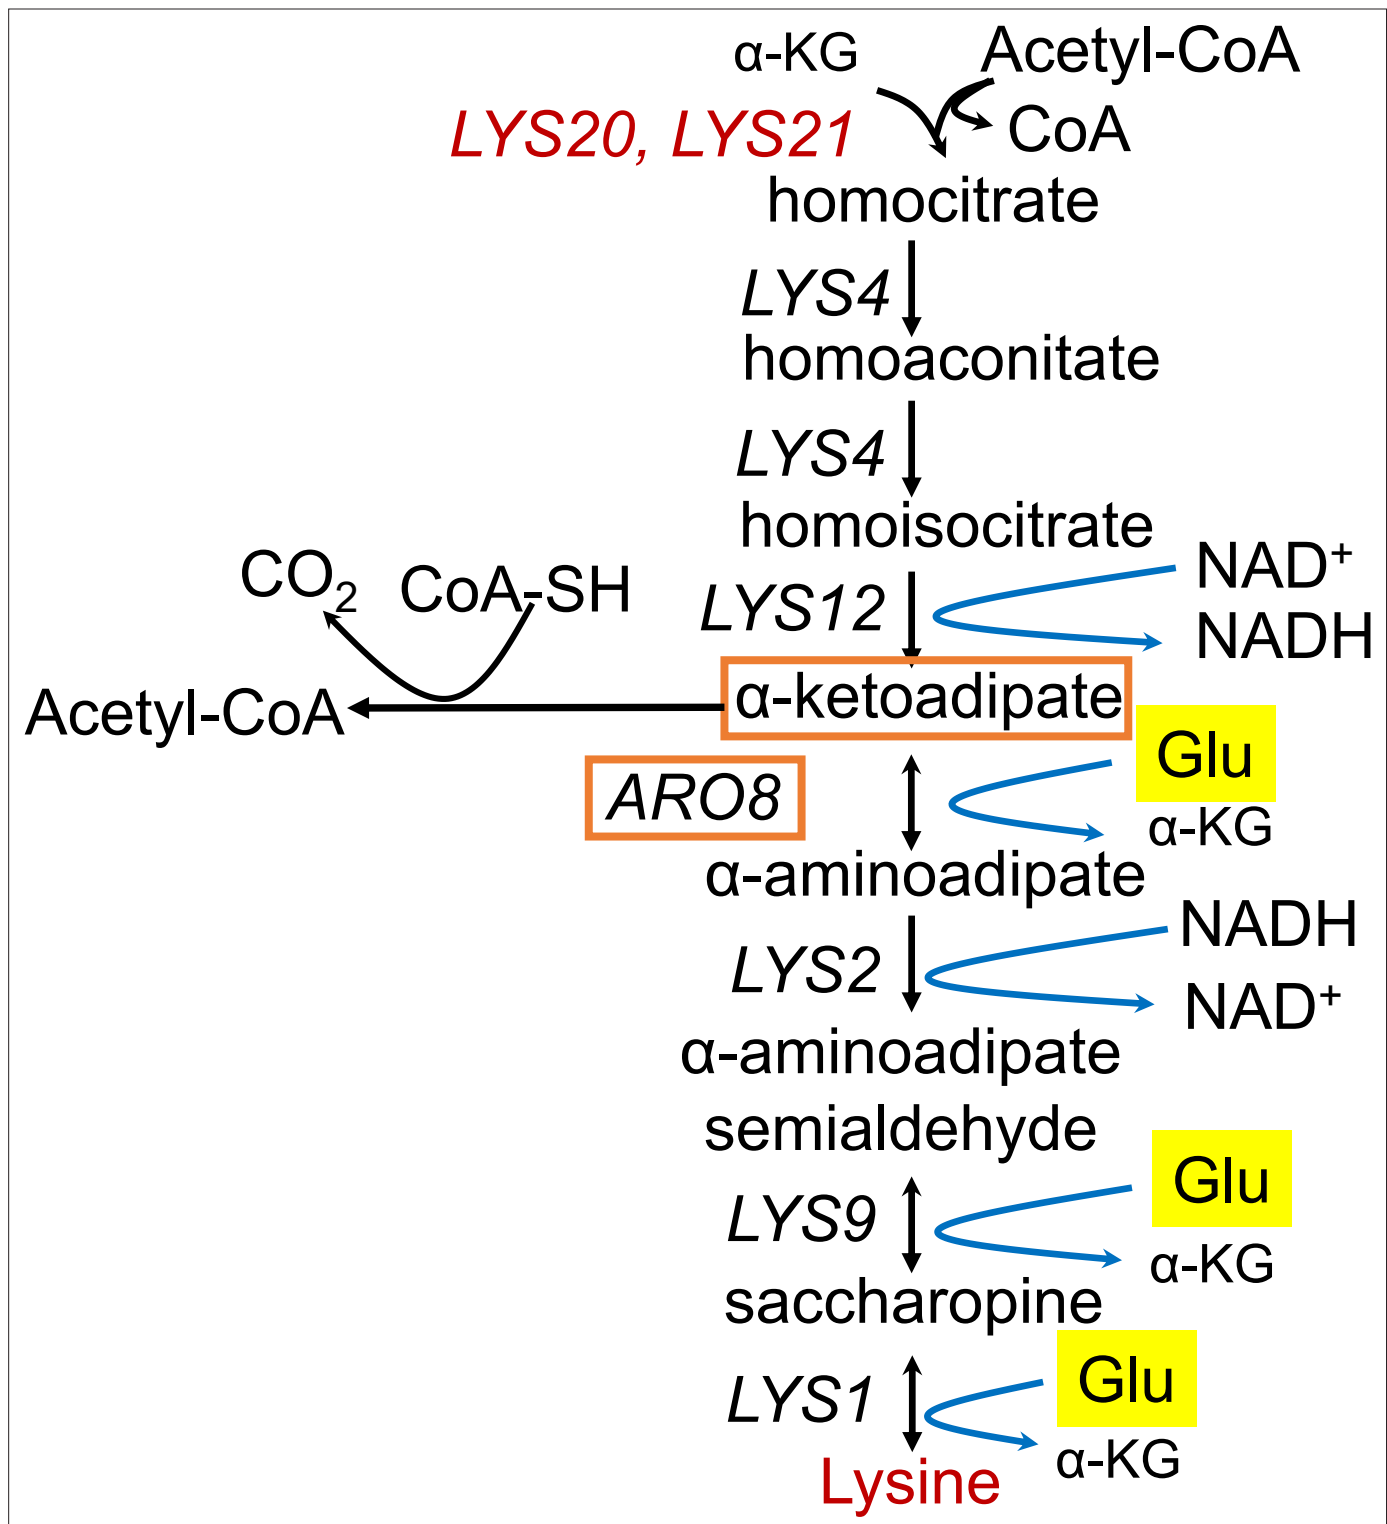

**Figure 6—figure supplement 2.** Lysine biosynthesis and replicative lifespan (RLS). Genes and metabolites from the lysine biosynthetic pathway that are found to be negatively associated with RLS are colored in red. Genes and metabolites that are known to be involved in tryptophan metabolism are highlighted with orange boxes, and glutamate is highlighted in yellow.

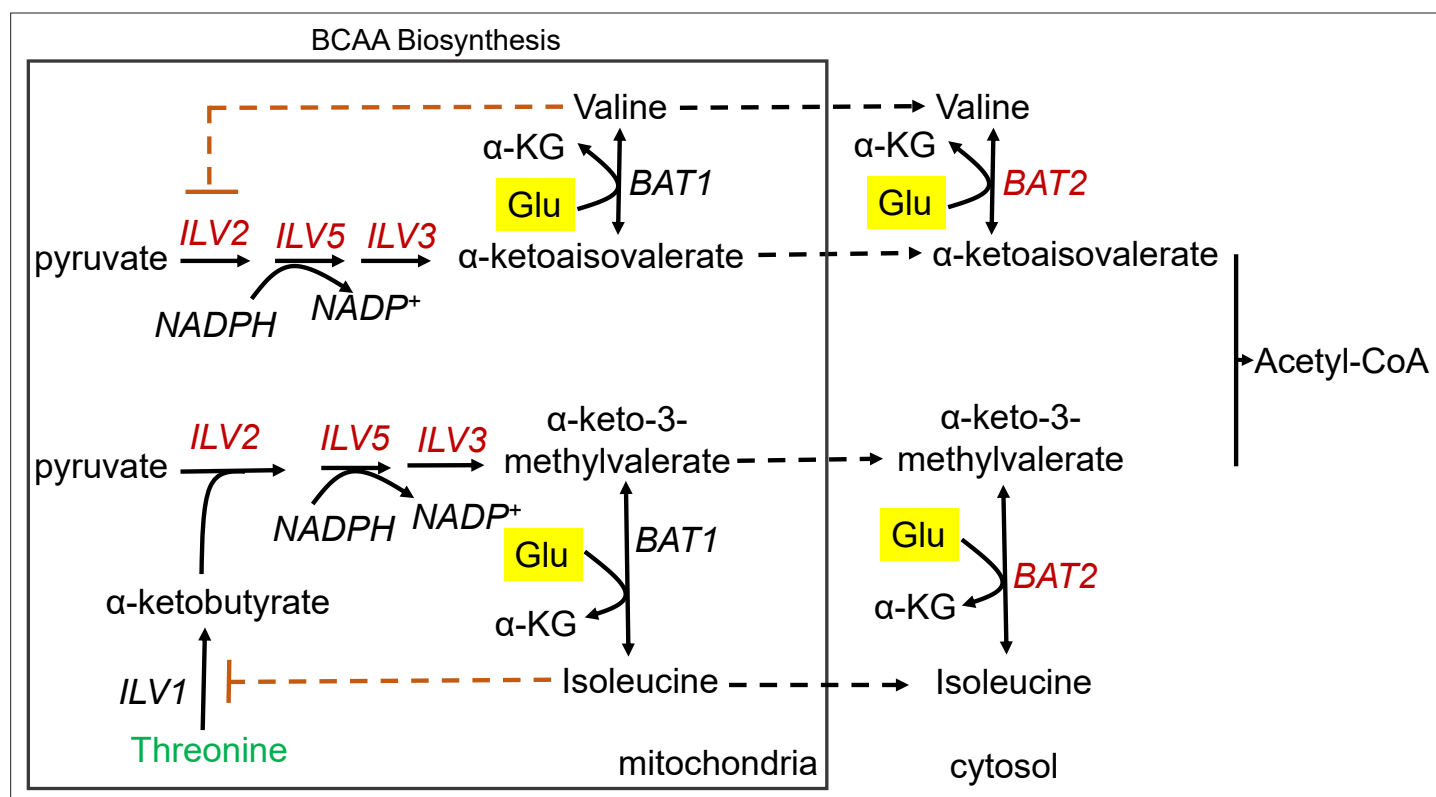

**Figure 6—figure supplement 3.** Genes from the branched chain amino acid (BCAA) metabolic pathway are negatively associated with replicative lifespan (RLS). Genes involved in BCAA biosynthesis that are found to be negatively associated with RLS are colored in red. Threonine (positively associated with RLS) catabolism, is shown in green, and contributes to the BCAA biosynthesis. Glutamate is highlighted in yellow.

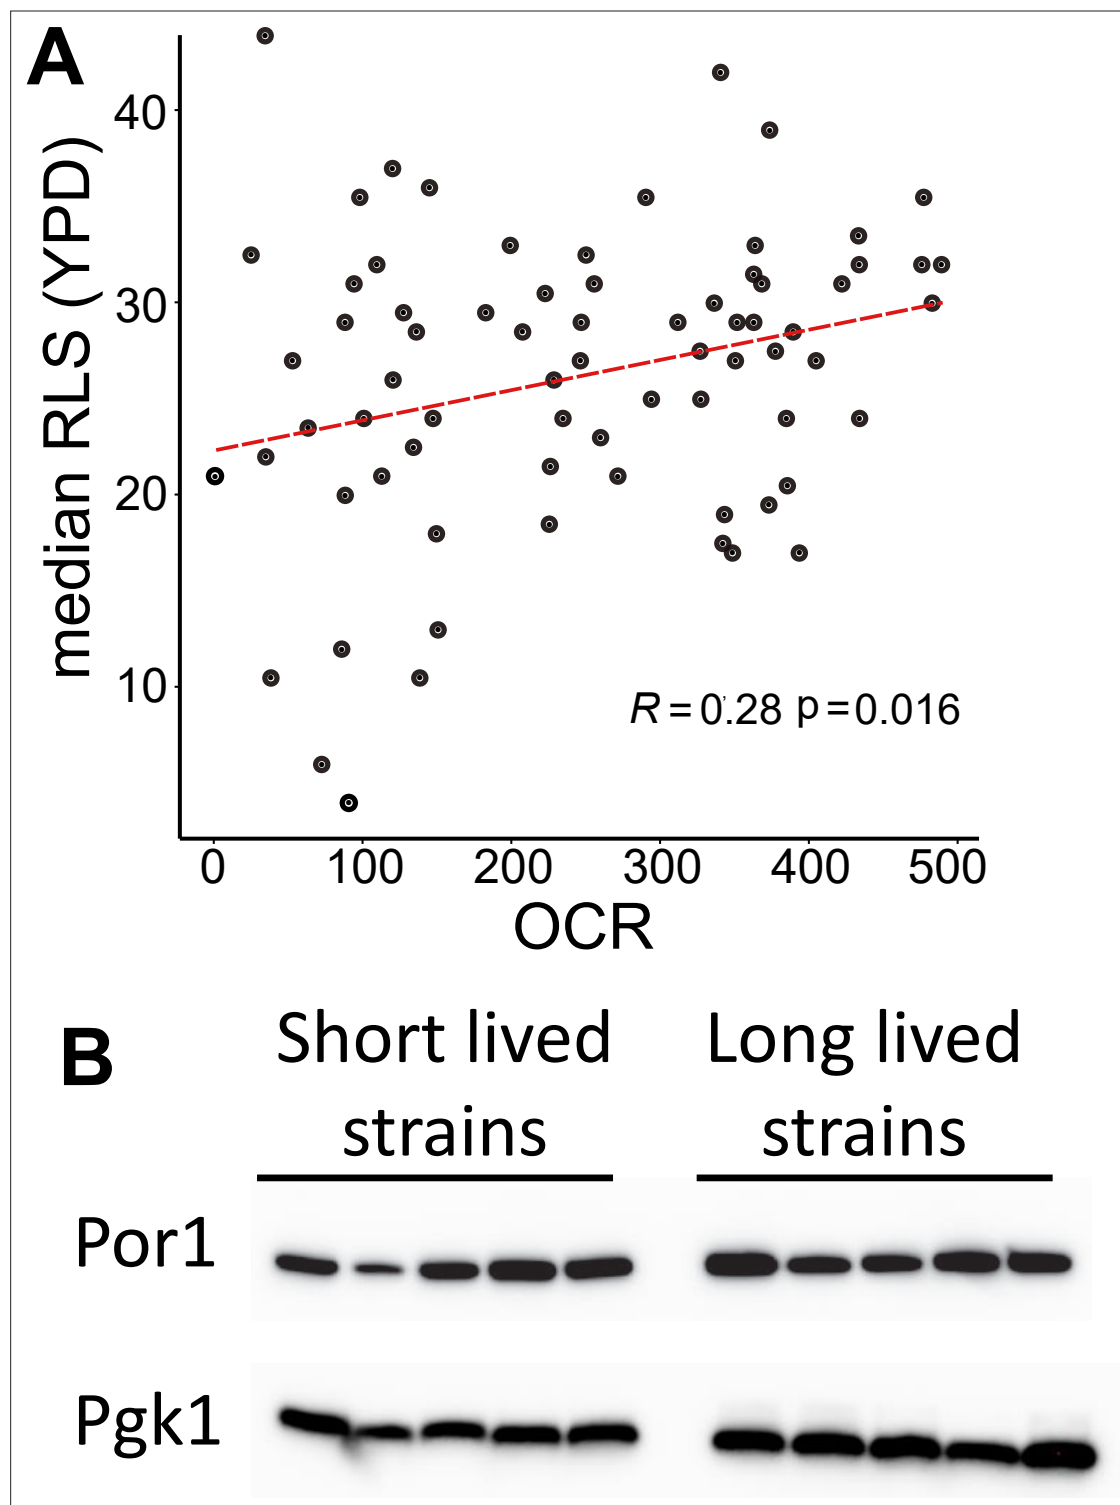

**Figure 6—figure supplement 4.** Association of mitochondrial respiration with median replicative lifespan (RLS). **(A)** Spearman correlation between median RLS and oxygen consumption rate (OCR; pmol/min). **(B)** Western blot analysis for mitochondrial protein abundance across the strain. Similar expression of mitochondrial porin Por1 (voltage-dependent anion channel) was verified with western blotting. Pgk1 is used as internal loading control. Raw images are also provided as source file.

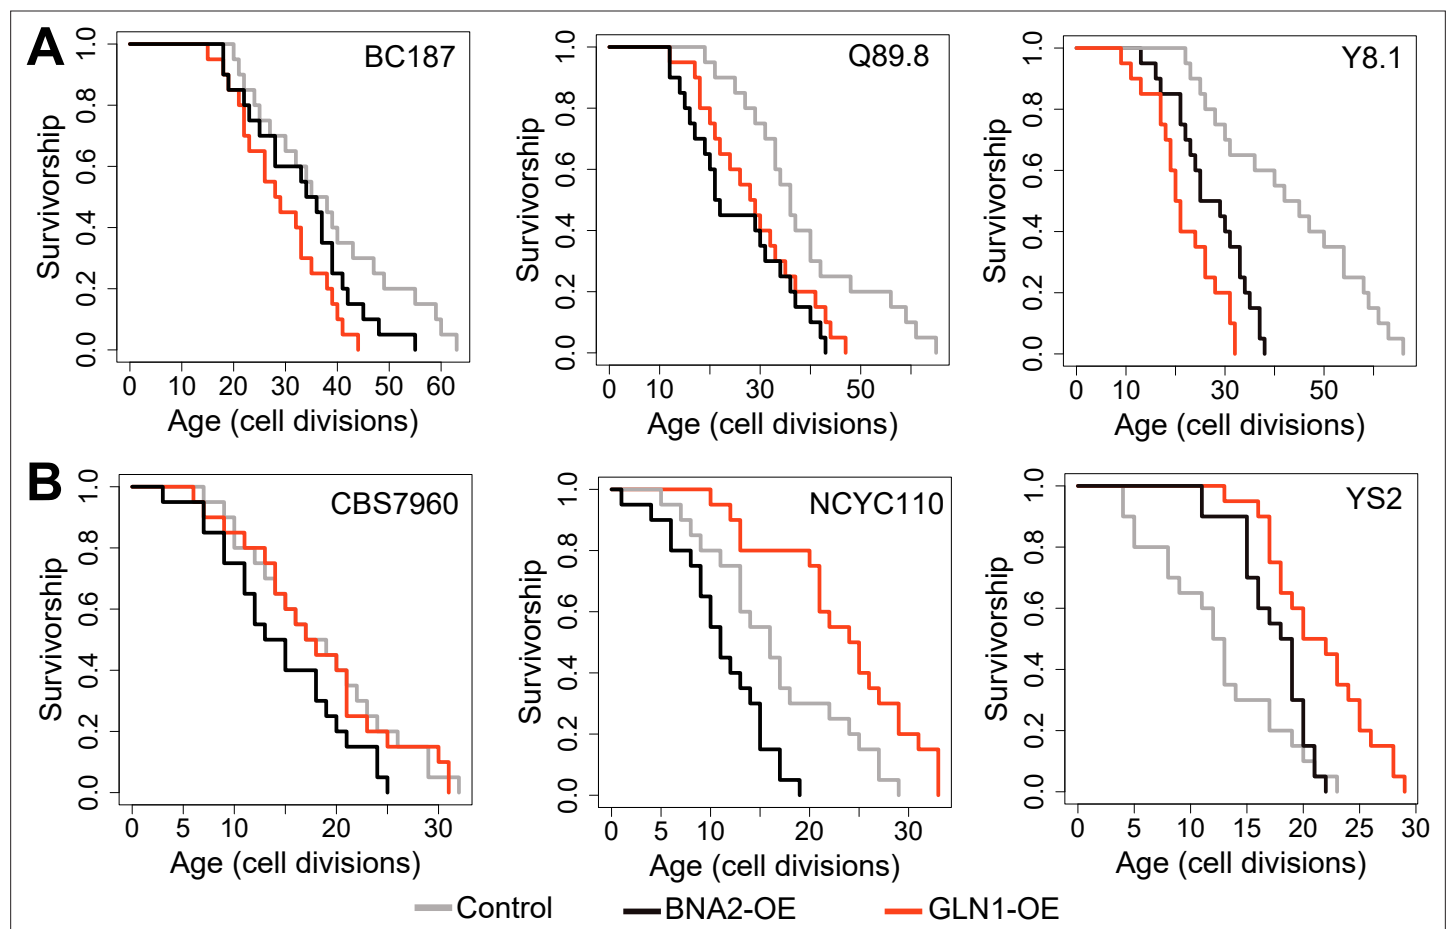

**Figure 7.** Replicative lifespan (RLS) effect of *GLN1* and *BNA2* overexpression in selected long- and short-lived strains. Lifespan curves for control (gray), *BNA2* (black), and *GLN1* (red) overexpression in (A) long- and (B) short-lived strains. Lifespan data and significance of lifespan changes can be found in [Supplementary file 1](#).

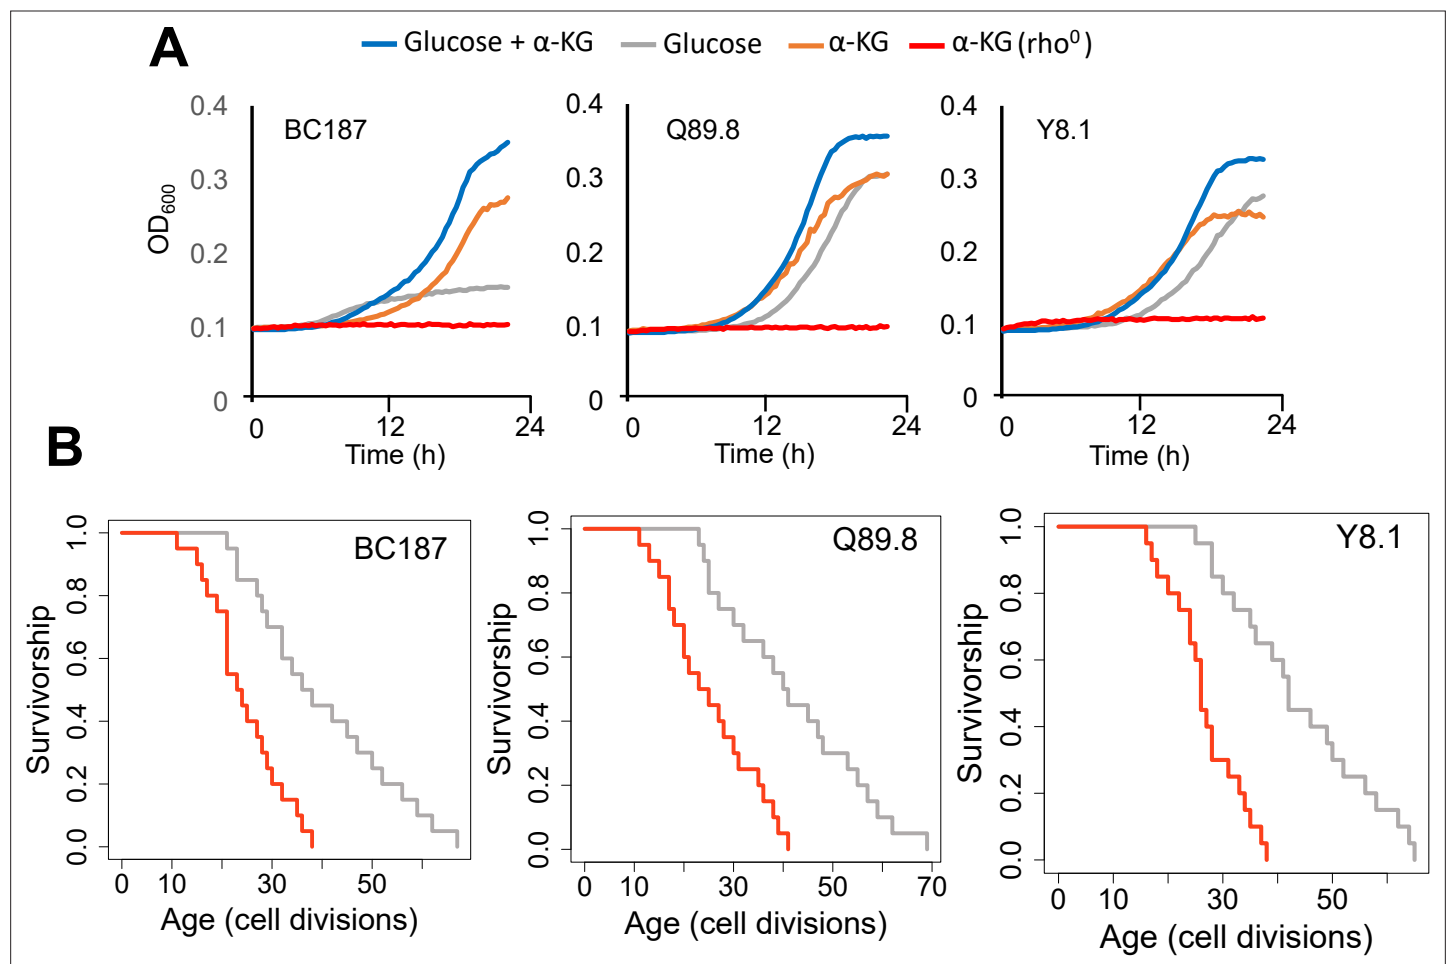

**Figure 8.** Growth properties of long-lived strains in medium supplemented with alpha-ketoglutarate (α-KG) and effect of mitochondrial DNA (mtDNA) elimination on α-KG utilization and replicative lifespan (RLS). **(A)** The growth of three long-lived strains was further supported with α-KG supplementation (10 g/l). However, strains lost the ability of α-KG utilization upon mtDNA elimination (red). Growth data of OD<sub>600</sub> measurement can be found in **Supplementary file 1**. **(B)** Elimination of mtDNA significantly reduced RLS in all three long-lived strains. Lifespan data and significance of lifespan changes can be found in **Supplementary file 1**.

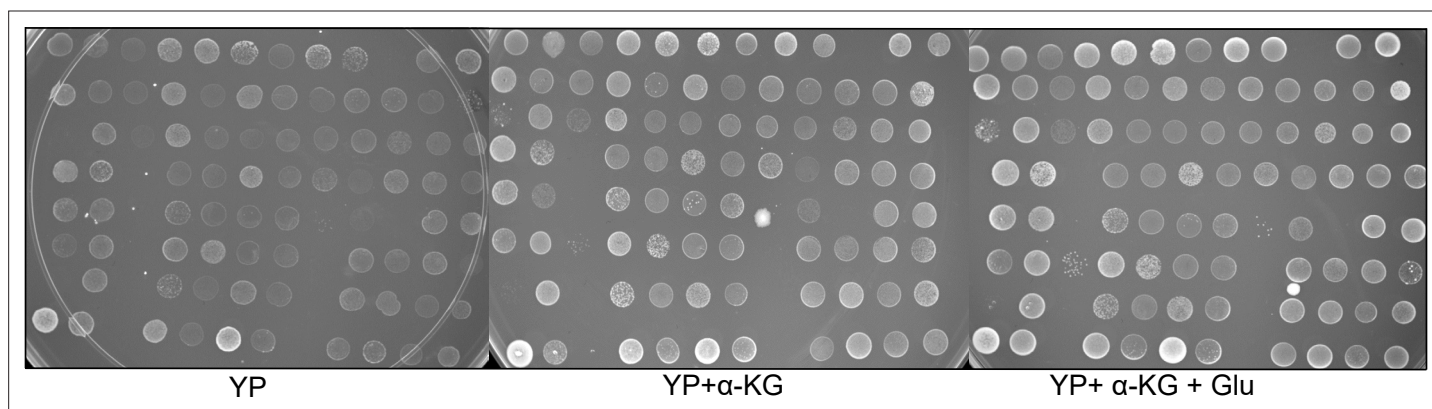

**Figure 8—figure supplement 1.** Effect of alpha-ketoglutarate ( $\alpha$ -KG) on growth. Spot assay for wild isolates on medium containing YP (yeast extract and peptone), YP supplemented with  $\alpha$ -KG (10 g/l), and YP supplemented with both  $\alpha$ -KG (10 g/l) and glucose (0.02%). Each spot represents one of the strain. Plates were incubated at 30 °C and pictured after 3 days.
