# Supplementary material for: Evolution of natural lifespan variation and molecular strategies of extended lifespan in yeast
Source: eLife journal article supplement (doi:10.7554/elife.64860), 2021-11-09
Supplement: supp [file elife_poa_e64860_Figure_6_figure_supplement_1.pdf › elife_poa_e64860_Figure_6_figure_supplement_1.pdf]

# Shikimate pathway

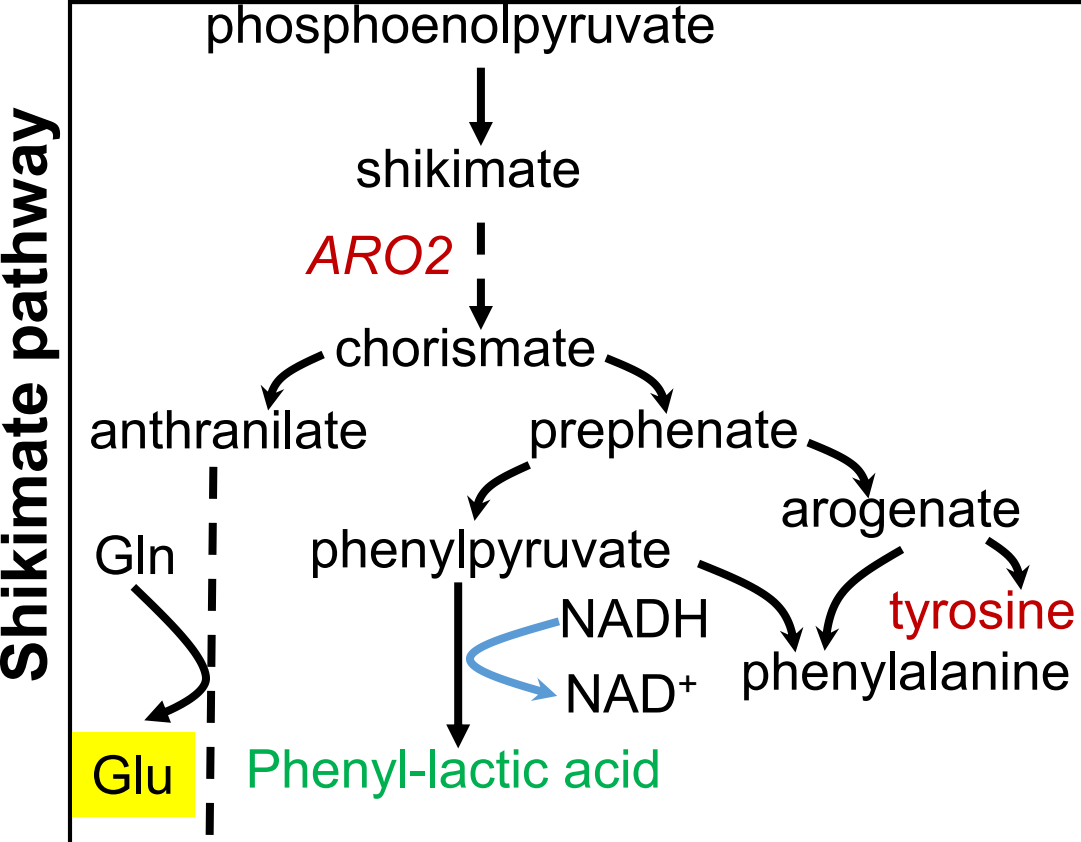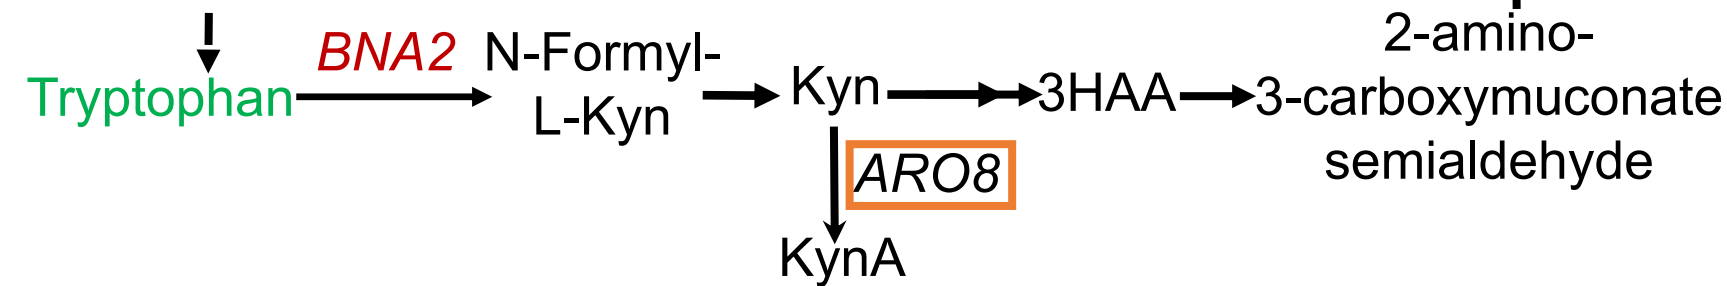

## De novo NAD<sup>+</sup> synthesis

$\alpha$ -ketoadipate

Quinolinic  
Acid

2-amino-

3-carboxymuconate  
semialdehyde

3HAA

Kyn

N-Formyl-  
L-Kyn

*BNA2*

Tryptophan

Glu

Gln

QNS1

NaAD

NaMN

NA

*PNC1*

NaM

NAD

## Salvage pathway
