# Supplementary material for: Evolution of natural lifespan variation and molecular strategies of extended lifespan in yeast
Source: eLife. 2021 Nov 9;10:e64860. doi: 10.7554/eLife.64860 (PMC8612763; doi:10.7554/eLife.64860)
Supplement: Supplementary file 2. — Normalized metabolite count is also included. Results from phylogenetic generalized least square (PGLS) analysis from both datasets along with statistical values are listed for natural isolates. Similarly, genes associated with RLS (mean, median, and maximum) of KO strains along with statistical values are also listed. This file also includes result GSE enrichment terms with statistical values for natural isolates and KO strains. [file elife-64860-supp2.xlsx]

## Sheet: Raw-Counts_RNA-seq
273614N_S1	273614N_S2	273614N_S3	322134S_S3	378604X_S1	378604X_S2	378604X_S3	A12_S1	A12_S2	A12_S3	A4_S1	A4_S2	A4_S3	BC187_S1	BC187_S2	BC187_S3	CBS432_S1	CBS432_S2	CBS432_S3	CBS5829_S1	CBS5829_S2	CBS5829_S3	CBS7960_S1	CBS7960_S2	CBS7960_S3	CLIB215_S1	CLIB215_S2	CLIB215_S3	CLIB324_S1	CLIB324_S2	CLIB324_S3	CLIB352_S1	CLIB352_S2	CLIB352_S3	DBVPG1106_S1	DBVPG1106_S2	DBVPG1106_S3	DBVPG1373_S1	DBVPG1373_S2	DBVPG1373_S3	DBVPG1788_S1	DBVPG1788_S2	DBVPG1788_S3	DBVPG1853_S1	DBVPG1853_S2	DBVPG1853_S3	DBVPG4650_S1	DBVPG4650_S2	DBVPG4650_S3	DBVPG6040_S1
851229.PAU8	19	17	20	13	1	7	5	4	32	3	2	65	7	34	31	49	5	9	1	8	6	1	1	0	1	21	41	19	52	28	55	0	5	2	9	9	8	22	7	20	27	23	31	0	1	0	8	21	13
1466426.None	0	0	0	0	0	1	0	0	0	0	0	1	0	0	0	0	0	0	0	0	0	0	1	5	1	1	5	3	0	0	1	0	0	2	0	0	0	0	0	0	1	0	0	0	0	0	0	0	0
851230.SEO1	47	46	53	32	69	59	72	87	83	126	27	47	38	0	0	0	29	36	57	18	24	35	0	0	0	0	0	0	26	22	17	21	46	23	0	0	0	11	50	19	0	0	0	105	94	86	40	31	43
851232.None	9	12	20	0	6	5	5	10	6	14	6	4	10	0	0	0	16	31	15	52	50	44	0	0	0	0	0	0	5	1	6	1	4	0	0	0	0	2	31	3	0	0	0	57	60	66	74	100	101
851233.None	13	5	15	0	5	2	6	6	4	15	10	8	7	0	0	0	6	12	17	5	2	3	1	5	1	11	4	5	4	9	9	9	10	12	1	3	1	0	0	0	1	0	0	16	25	31	23	24	33
851234.TDA8	11	3	17	0	0	0	0	0	0	0	0	0	0	0	0	0	4	0	12	4	0	0	0	0	0	0	0	0	7	7	21	0	0	0	0	0	0	0	0	0	0	0	0	0	0	0	3	8	5
851235.None	7	5	4	0	0	0	0	0	0	0	0	0	0	0	0	0	0	0	0	0	0	0	0	0	0	0	0	0	1	1	1	0	0	0	0	0	0	0	0	0	0	0	0	0	0	0	0	0	0
1466427.None	6	7	7	2	1	3	1	0	0	0	0	0	0	0	0	0	0	0	0	0	0	0	0	0	0	0	0	0	4	3	4	0	0	0	0	0	0	0	0	0	0	0	0	0	0	0	0	0	0
851236.FLO9	102	90	143	33	41	33	61	55	49	74	1	4	10	7	3	7	50	103	56	4	2	3	9	19	19	52	68	46	53	78	81	62	131	79	17	30	30	0	8	16	20	19	25	46	56	51	173	182	167
851237.GDH3	29	18	51	150	34	46	59	103	150	223	45	105	82	38	28	52	50	227	75	48	64	53	33	37	51	40	62	39	74	81	101	32	52	28	32	43	46	67	41	89	44	32	43	45	64	45	84	95	119
851238.BDH2	57	29	62	72	67	53	107	105	67	62	8	74	28	28	26	46	18	45	23	36	47	65	42	47	30	20	32	30	67	120	93	26	47	37	30	47	45	14	32	27	62	68	94	41	64	51	284	306	275
851239.BDH1	904	894	1399	951	475	456	777	1459	1311	1411	554	1303	871	774	789	1176	526	1036	604	276	283	323	1214	1206	1228	612	784	645	634	929	928	1691	2535	1986	778	749	989	879	1042	1245	910	705	964	1340	923	1459	853	894	840
851240.ECM1	761	849	1045	791	1002	1086	1260	607	551	581	330	388	506	383	350	482	631	1050	812	269	260	297	536	602	523	504	535	471	667	582	937	562	890	597	561	592	706	1086	615	1336	812	731	853	366	774	346	497	452	496
851241.CNE1	284	220	382	301	239	198	324	272	248	294	76	218	169	184	224	305	216	567	317	415	443	476	212	326	269	175	283	233	260	362	414	242	468	329	161	295	264	209	150	301	225	175	215	130	218	161	340	352	306
851243.GPB2	294	321	472	118	66	56	103	345	375	447	85	248	193	173	167	269	95	311	161	92	73	111	61	130	117	94	122	72	219	292	360	75	179	119	92	188	133	76	77	105	124	97	179	93	122	94	131	140	146
851244.PEX22	66	82	102	67	58	58	68	61	44	40	9	85	23	75	46	88	70	182	83	27	15	21	64	84	77	53	82	63	76	106	88	64	83	57	57	84	65	47	52	58	59	69	57	57	52	76	66	74	65
851245.ACS1	92	74	133	102	81	111	100	2	5	2	0	11	4	52	48	79	3	12	0	7	1	1	93	69	67	41	50	48	53	73	78	67	113	93	44	59	71	60	57	77	69	49	73	92	100	93	2	10	4
851246.FLC2	1153	1091	1435	754	414	279	575	770	1084	1131	250	992	472	1727	1794	2558	671	1267	939	90	67	71	547	724	544	1046	1349	1138	905	1213	1258	466	890	634	896	1363	1163	816	666	1085	1281	1030	1382	690	488	768	509	564	505
851247.OAF1	297	279	442	266	158	141	230	242	222	258	43	206	110	236	263	351	94	264	182	131	110	134	122	277	195	210	311	261	191	310	315	113	304	233	201	330	299	177	206	240	336	277	357	259	298	327	207	208	191
851248.AIM2	495	480	653	1093	701	706	923	477	653	630	354	695	491	1208	1145	1612	486	984	556	378	439	458	1169	1224	1219	737	1030	787	995	828	1328	1194	2103	1493	855	1191	1195	681	552	790	674	607	648	553	546	638	448	492	409
851249.GEM1	144	95	194	116	66	59	108	142	105	93	13	82	32	119	118	187	59	129	81	18	11	18	56	108	76	90	168	102	57	105	127	69	123	104	90	119	125	66	69	110	104	94	145	74	126	125	75	79	74
851250.SPC72	126	110	133	85	59	62	110	94	111	99	34	124	56	81	73	107	80	121	83	77	65	102	37	100	78	72	101	82	88	102	109	52	81	69	85	116	100	62	64	84	110	86	129	77	93	100	117	105	106
851251.BOL3	269	274	248	221	292	351	350	279	431	379	228	375	292	257	176	245	199	315	177	85	90	105	461	332	324	105	107	108	429	273	430	414	515	387	152	178	167	141	204	188	246	203	181	249	218	237	288	326	234
851252.BOL1	223	233	177	208	246	272	197	170	280	245	184	202	193	227	248	199	109	58	108	104	86	114	289	197	190	149	110	99	238	203	259	269	300	208	186	175	171	196	184	161	193	220	166	185	166	132	139	174	173
851254.GCV3	1774	1903	1898	1903	2150	2112	2253	1661	1904	1627	1968	1530	1832	1246	1317	1504	1005	2027	984	356	392	478	2300	1667	1686	1777	1832	1485	1578	2081	1761	1615	1958	1476	1435	1608	1666	1043	1448	1231	1544	1335	1299	1857	1908	1648	978	968	917
851255.PTA1	290	275	466	265	203	148	292	346	271	260	23	306	71	186	181	283	287	667	351	81	82	95	119	194	187	330	509	381	185	388	272	107	253	170	247	388	353	325	219	408	394	293	454	236	377	319	414	470	439
851256.ERV46	1198	1204	2046	1514	1014	781	1499	1224	1253	1289	601	1363	932	1100	1054	1851	766	3316	1324	224	290	395	1029	1138	1268	1084	1787	1433	1271	2222	2009	718	1546	1120	1124	1921	1830	949	952	1541	1166	920	1473	1262	1781	1522	1124	1128	1105
851190.CDC24	343	272	369	280	186	193	270	518	421	437	166	399	237	273	269	371	331	576	447	348	393	391	169	355	198	269	388	251	337	384	433	150	255	190	256	412	334	236	189	284	292	287	336	256	325	282	423	439	412
851191.CLN3	823	722	1126	626	343	282	487	1116	875	907	37	1244	181	595	590	843	732	1260	923	35	32	25	316	458	404	805	1211	879	353	738	543	324	590	404	579	750	733	469	463	520	1216	996	1247	737	780	774	893	1014	924
851192.CYC3	416	402	767	767	427	430	755	742	699	709	126	938	251	580	580	973	534	2249	778	159	166	192	298	456	464	317	687	456	436	1082	822	389	944	677	407	570	734	408	446	746	823	675	1208	528	974	816	512	442	417
851193.CDC19	17416	16352	21866	22075	15185	12885	19186	21641	19831	21552	6862	16829	9747	17519	16913	24020	20181	27066	25184	2073	2007	2301	10373	13384	10796	19721	28464	21872	9579	23796	12448	8863	15013	10621	20039	22671	25094	17579	18147	22071	15949	13535	16043	24773	27266	25760	21699	22755	22193
1466428.None	6	5	6	8	10	20	11	1	2	0	3	0	1	5	4	8	0	1	0	0	5	0	8	7	6	6	3	2	3	6	12	7	10	5	5	1	5	6	4	7	4	5	0	6	3	2	3	1	1
851194.None	31	50	60	41	65	56	62	10	9	18	11	9	10	49	40	64	13	13	11	53	87	52	88	161	95	42	53	48	113	61	118	65	87	87	28	39	33	32	36	45	47	33	36	29	58	54	22	19	38
851195.RBG1	1025	962	1265	1060	851	832	1228	1111	814	833	244	744	386	508	594	757	916	1560	1242	179	184	168	633	926	741	722	981	797	806	1250	1085	546	1016	713	774	1122	1075	918	924	1173	950	873	966	1000	1960	1040	571	625	604
851196.FUN12	2613	2545	3325	2383	1757	1453	2101	2833	2144	2382	450	2278	696	1820	1868	2511	2808	5838	3625	800	840	926	839	1542	1201	2373	3085	2282	1559	2669	2003	1073	1851	1172	2246	3191	2695	2519	2143	3090	3044	2327	2892	2438	3573	2587	2417	2460	2340
851197.MTW1	78	51	90	68	67	64	67	63	46	28	34	49	21	33	39	35	56	80	51	22	37	30	71	87	67	70	53	63	56	50	58	36	67	50	46	75	60	67	54	71	76	81	63	53	78	49	88	46	79
851199.FUN19	125	76	104	77	59	43	102	71	113	151	11	181	38	115	105	189	74	124	91	51	59	51	45	79	61	53	111	76	91	143	141	90	180	105	47	97	72	52	65	93	103	92	114	63	77	73	110	136	115
851200.POP5	179	176	171	187	264	266	252	162	172	140	138	114	135	131	109	131	133	119	146	22	26	21	271	198	192	126	141	111	291	167	325	188	266	135	158	133	185	170	176	154	170	150	140	229	246	180	105	136	137
851201.PRP45	113	126	190	138	81	90	123	229	209	188	51	247	93	161	122	200	261	749	398	106	106	107	101	109	96	91	131	98	134	187	151	99	177	118	76	155	141	74	71	112	109	105	116	79	120	95	232	236	230
851202.GIP4	128	128	149	107	87	60	94	121	134	162	38	143	76	125	180	175	66	131	126	65	88	92	40	56	62	96	112	94	94	131	122	55	89	55	114	179	104	76	64	102	140	135	132	95	100	79	150	197	168
851203.SNC1	195	218	222	210	192	241	217	247	380	326	322	384	306	184	200	225	178	282	180	292	279	342	244	225	183	197	197	137	249	243	281	191	258	154	178	193	195	184	167	162	297	226	198	224	182	194	289	308	325
851204.MYO4	705	621	1020	742	438	365	579	565	555	583	90	556	229	618	584	977	513	768	740	43	41	71	269	679	484	710	928	757	526	828	847	330	555	441	666	839	815	564	519	818	772	662	808	521	834	660	576	596	540
851205.FRT2	35	32	41	33	32	30	34	54	76	99	35	75	52	48	46	91	37	78	38	10	14	13	31	34	28	23	25	46	27	32	43	41	67	34	23	41	26	21	15	24	21	23	24	20	25	34	104	100	88
851206.SAW1	133	136	172	122	114	143	166	50	172	164	87	185	110	126	115	153	67	156	116	145	147	127	149	217	184	98	130	108	121	128	160	152	170	166	98	131	99	77	86	98	103	94	94	113	104	128	120	138	137
851207.DRS2	324	351	446	318	186	174	251	444	401	434	277	432	293	270	276	392	242	353	317	78	74	92	242	410	329	332	464	328	339	461	474	183	313	228	292	400	380	256	247	370	330	297	351	294	309	281	365	358	312
851208.MAK16	1494	1386	1956	1294	1164	1169	1491	1452	1179	1127	511	908	628	768	682	1053	1406	3553	1753	423	459	488	601	1237	929	942	1285	1035	1059	1735	1317	580	1013	753	1126	1323	1314	1574	1082	1825	1479	1193	1392	1174	2181	1233	903	955	917
851209.LTE1	163	158	244	149	88	93	115	138	133	134	33	149	55	103	110	170	102	193	154	112	130	119	79	165	98	134	185	137	105	143	164	53	107	92	118	174	123	138	100	144	168	108	169	117	137	117	159	166	125
851210.PMT2	1497	1276	2196	1893	1225	1026	1893	1628	2280	2297	1106	2092	1528	1527	1507	2268	973	2756	1524	314	335	398	1313	1413	1395	1317	2152	1590	1285	2566	1811	859	1673	1215	1402	2349	2084	1276	1141	1690	1734	1258	1904	1351	2124	1634	1662	1777	1675
851211.FUN26	232	233	335	322	225	174	339	238	337	329	88	252	184	210	243	312	135	508	240	192	156	209	209	230	238	299	430	326	263	457	340	157	379	259	238	359	324	245	197	354	251	198	297	331	398	358	192	215	197
851212.CCR4	731	647	1158	822	475	344	725	705	624	732	29	564	157	584	528	913	522	1281	807	30	14	19	229	321	265	575	1108	761	350	1087	609	265	625	473	636	1120	939	621	464	1058	804	598	959	532	871	758	622	709	616
851213.ATS1	269	309	551	582	309	263	533	354	435	499	135	357	242	297	287	513	149	737	280	269	290	379	370	359	489	291	579	425	525	734	975	402	874	735	299	502	583	209	258	388	288	213	420	310	449	447	300	274	257
851214.FUN30	459	449	607	499	338	256	448	510	398	438	109	372	171	389	352	463	433	654	558	27	19	15	177	393	264	418	574	427	340	532	507	171	335	247	409	590	510	382	341	524	579	480	553	421	544	465	364	370	347
851215.LDS1	0	8	4	11	0	0	1	1	3	4	0	3	4	1	0	3	0	0	0	11	10	12	0	3	0	1	0	0	0	0	0	0	0	1	0	0	0	0	0	0	0	0	1	3	2	3	5	7	4
851216.PSK1	203	169	288	157	108	95	159	299	296	351	56	271	102	169	210	323	132	277	180	127	97	105	104	223	155	167	225	161	161	171	280	89	185	159	120	212	181	80	113	130	144	151	226	167	171	195	239	192	227
851217.TPD3	754	679	1089	903	585	568	876	938	920	899	308	1052	479	715	692	1066	729	1485	967	162	169	191	513	918	654	825	1143	815	647	828	919	435	803	587	736	1010	1033	666	585	952	855	759	990	664	1038	821	888	935	889
851218.NTG1	153	167	228	157	123	117	157	113	95	94	30	145	44	110	103	165	64	137	79	24	18	14	103	145	166	100	134	106	166	123	197	78	194	128	83	129	156	85	114	136	149	101	145	136	179	137	117	109	125
851219.SYN8	255	266	391	308	238	252	333	233	408	382	185	343	303	235	259	359	162	381	197	33	37	46	216	329	284	227	355	295	229	365	431	221	470	344	192	294	280	197	152	239	301	236	295	221	244	278	173	176	221
851220.DEP1	324	231	574	303	199	173	387	266	232	283	17	160	59	200	150	307	119	457	194	10	19	15	100	160	168	179	424	306	217	422	367	120	290	214	194	276	340	221	179	432	405	278	451	217	370	319	190	167	196
851221.CYS3	1887	1590	2377	1522	1075	954	1438	3104	2763	2761	401	2328	899	1384	1306	1908	1838	4547	2636	426	438	433	829	1043	929	1899	2448	2085	1561	2456	2242	882	1634	1113	1529	2016	1830	1821	1397	2413	1547	1424	1724	1543	1974	1604	2561	2815	2709
851222.SWC3	167	153	196	105	100	72	150	283	281	310	43	166	89	90	151	146	142	344	196	115	142	130	69	126	103	127	176	150	118	203	185	59	154	86	97	140	133	142	78	141	184	145	175	106	141	97	159	166	176
851223.MDM10	96	106	184	136	102	97	134	201	146	159	72	169	107	125	120	166	137	195	141	419	455	439	96	159	111	78	124	105	114	148	132	98	181	131	120	183	155	108	88	110	139	135	150	98	131	102	185	214	190
851224.SPO7	185	209	303	241	209	209	311	273	299	309	239	286	355	142	128	203	122	325	172	142	153	169	223	244	292	166	189	167	290	292	431	184	333	283	127	177	225	104	120	178	162	138	191	145	187	183	226	191	205
851225.FUN14	179	193	244	147	121	136	158	243	313	269	174	397	185	214	173	283	150	270	175	293	304	298	148	178	150	120	112	99	135	183	184	125	187	124	138	152	153	117	95	115	162	146	135	179	150	153	330	365	347
851226.ERP2	888	932	1046	998	1121	1240	1316	1045	1432	1312	1867	1470	2171	870	857	1092	557	1260	699	324	332	299	1221	2007	1504	729	880	719	1005	903	1332	1127	1671	1270	934	990	1034	819	766	893	849	726	686	837	941	869	936	869	880
851259.SSA1	2742	2542	3544	2385	4841	4296	6123	1180	1491	994	83	1262	182	417	426	626	241	365	332	200	200	235	1941	2803	2036	750	910	720	6636	1719	8531	362	809	524	261	182	289	336	2389	377	919	751	720	9403	5373	9793	1552	1538	1516
851260.EFB1	10815	10262	10693	9329	10189	12564	10851	10436	9436	10174	7706	7992	8292	7161	6837	8144	11257	6758	10689	1819	1822	2123	9642	12057	9404	8685	10384	8135	10904	8408	12277	7544	12430	8330	8724	9636	9310	10219	9134	10002	12220	11399	10283	10875	12669	9564	9081	9821	9400
851261.VPS8	221	192	272	159	110	132	152	208	250	286	40	212	81	233	238	298	94	223	131	140	109	156	77	177	128	177	271	204	152	243	263	135	248	199	175	296	228	146	160	167	217	173	209	152	170	170	186	204	168
851262.TFC3	156	195	272	174	140	139	183	236	219	256	75	261	96	182	168	297	117	319	217	594	629	671	136	300	229	190	272	241	218	211	299	98	169	151	163	242	174	101	116	127	168	154	191	160	176	213	235	238	253
851263.NUP60	562	522	749	536	441	386	577	558	486	499	337	480	421	390	367	579	453	433	567	435	467	501	280	564	457	437	723	501	642	761	849	282	579	341	465	651	573	445	377	649	535	450	623	442	752	533	464	537	472
851264.ERP1	944	905	986	978	1291	1446	1220	737	1031	1018	1136	1017	1195	884	790	957	594	766	623	359	354	470	1378	1244	1108	661	625	526	1229	935	1281	1258	1520	1173	867	985	881	899	791	863	859	831	711	808	1005	752	1041	1109	1064
851265.SWD1	237	269	314	271	242	235	322	142	149	156	33	153	79	197	188	270	101	168	143	25	16	18	259	337	259	245	295	222	361	278	476	240	368	289	217	348	258	202	175	205	255	253	275	192	251	187	136	133	120
851266.RFA1	420	400	581	400	303	256	416	514	357	361	176	349	242	287	328	430	236	402	267	151	140	161	287	448	326	345	430	398	350	433	466	221	375	244	338	657	408	243	356	357	419	355	450	421	493	459	322	342	307
851267.SEN34	167	208	294	180	120	154	164	222	215	200	144	214	150	134	115	166	91	244	143	197	220	227	137	210	174	160	198	190	149	188	264	109	162	141	177	254	229	133	128	171	165	177	177	128	197	171	160	170	140
851268.None	0	0	0	27	0	3	6	0	0	0	0	2	0	0	0	0	0	0	0	0	0	0	0	0	0	0	0	0	191	325	257	0	0	0	0	0	0	0	0	0	0	0	0	0	0	0	0	0	0
851269.None	0	2	2	7	3	7	6	2	6	1	0	0	0	0	0	0	1	0	0	0	2	1	81	73	85	0	0	0	0	0	2	0	0	0	0	0	0	0	0	0	0	0	0	0	1	4	9	19	16
851271.BUD14	506	455	790	539	331	290	485	449	449	398	63	426	165	378	366	601	317	1295	609	48	60	73	236	615	427	498	804	632	384	732	679	215	441	320	369	649	652	412	331	639	621	498	701	340	662	473	292	331	358
851272.ADE1	2442	2543	3132	2868	2807	2734	3401	2660	2473	2189	1527	2429	1976	1549	1512	2073	3361	6113	4008	7653	8278	8339	2207	2072	1998	3156	4398	3233	661	2836	789	1383	2191	1612	2703	2898	3197	3301	2271	3870	2831	2427	2926	2156	3068	2236	3243	3417	3202
851273.KIN3	283	296	379	242	221	208	224	167	187	142	44	216	79	157	140	189	164	218	171	41	63	52	170	288	217	306	361	333	362	416	413	196	382	256	221	326	231	277	185	306	353	295	365	172	210	180	144	154	170
851274.CDC15	112	109	154	107	67	68	85	103	99	131	14	113	19	130	111	114	61	157	90	86	83	102	63	80	74	119	134	112	157	171	137	105	159	138	86	149	133	126	91	167	124	115	129	82	78	70	94	98	106
851275.PAU7	19	18	22	35	8	8	16	9	13	5	1	1	1	15	39	34	17	44	35	3	6	3	10	17	6	19	30	25	17	25	18	17	20	20	28	43	17	23	25	25	16	13	15	33	25	28	22	23	16
851276.None	54	49	61	112	42	63	77	64	73	79	104	82	111	67	50	74	20	102	44	272	275	291	38	64	54	36	60	43	46	52	62	68	136	93	48	88	72	69	82	95	36	29	66	62	100	98	112	134	110
851279.UIP3	370	346	383	157	80	90	93	221	277	294	316	268	434	169	171	272	86	137	116	5	7	10	922	1167	1008	774	985	784	1396	1016	1628	824	1253	988	785	1150	903	553	350	642	219	227	246	453	440	486	179	199	196
851280.None	163	162	203	136	144	132	169	211	251	290	370	157	445	0	0	0	0	0	0	0	0	0	17	55	24	89	126	93	104	151	154	336	591	427	109	137	152	36	81	44	41	22	38	172	163	175	8	7	13
851281.None	30	30	50	22	11	17	23	0	0	1	0	0	0	0	0	0	0	0	0	0	0	0	17	36	20	38	49	45	52	41	76	85	112	91	20	49	25	20	158	56	26	39	35	550	393	434	0	0	0
851282.PRM9	131	142	147	22	51	57	56	0	2	4	2	2	2	12	9	8	1	3	2	6	6	9	5	14	9	114	105	94	61	45	69	58	97	85	21	28	21	36	28	39	20	14	19	166	188	153	4	4	8
851284.MST28	57	37	80	44	28	28	43	0	6	0	107	142	94	38	36	45	95	92	104	21	21	10	77	88	79	52	45	50	115	139	153	43	76	38	37	73	42	92	69	65	45	39	53	101	123	90	100	128	107
851285.YAT1	49	67	124	68	35	48	71	100	144	139	39	94	80	56	52	130	41	176	89	18	14	17	35	59	40	36	76	45	19	51	34	22	54	30	41	31	74	36	26	42	38	55	62	30	54	41	58	58	54
1466430.None	0	0	0	0	0	0	0	0	0	0	0	0	0	0	0	0	0	0	0	0	0	0	0	1	1	0	0	1	0	1	0	0	1	0	0	0	1	0	0	0	0	2	1	0	0	0	0	0	0
851286.SWH1	503	450	775	536	377	293	540	596	545	595	69	413	179	351	301	505	328	1026	478	68	52	71	146	363	258	431	682	536	206	576	350	196	367	297	423	565	606	427	316	602	614	461	680	347	618	508	471	473	490
851289.FLO1	126	97	167	30	11	2	10	104	87	95	6	20	18	15	23	32	79	141	100	5	13	7	11	12	6	106	145	89	23	31	34	25	37	16	38	32	68	86	57	134	122	87	118	142	167	170	406	421	404
851294.None	8	9	7	4	1	0	6	0	0	1	0	0	0	8	12	24	0	0	0	0	0	1	0	1	2	11	22	14	17	22	18	10	23	10	5	4	3	29	13	53	42	21	31	4	8	10	0	0	0
851295.None	46	25	68	13	26	10	30	69	25	27	0	0	0	5	3	16	224	636	362	0	0	0	7	19	19	27	39	29	3	15	3	5	25	12	15	16	22	15	4	25	52	27	56	2	2	1	242	250	254
851296.None	90	68	103	195	417	400	553	452	476	486	2365	980	1750	36	42	69	199	187	195	84	81	87	21	37	36	1542	2131	1758	10	17	20	612	953	714	67	89	81	1129	3533	1567	4697	3798	4536	6048	4640	5447	282	338	334
851299.PHO11	38	38	42	41	81	78	100	111	107	127	69	123	80	32	30	53	60	142	86	18	46	36	42	72	40	92	83	55	64	47	101	20	49	42	31	62	36	39	51	54	8	9	9	61	69	83	73	88	96
852159.None	145	164	270	142	165	147	227	77	106	122	15	4	36	169	160	393	19	67	46	0	1	1	48	94	108	208	430	278	391	822	662	190	282	223	5	3	6	79	139	139	80	75	138	159	199	218	44	27	20
852160.None	0	0	0	0	0	0	0	0	0	0	0	0	0	0	0	0	0	0	0	0	0	0	0	0	0	0	0	0	0	0	0	0	0	0	0	0	0	0	0	0	0	0	0	0	0	0	0	0	0
852161.None	67	65	91	24	14	11	13	5	8	19	0	2	0	13	0	14	5	7	4	1	0	2	15	39	28	5	10	11	13	11	11	18	18	20	0	0	0	15	9	22	3	6	2	0	3	2	15	18	13
852163.PAU9	7	1	1	25	15	15	12	3	4	12	0	0	0	55	68	58	0	0	0	0	2	1	1	1	0	102	103	116	6	3	8	2	3	5	33	31	34	0	4	1	2	2	2	3	6	6	0	0	0
852167.MIX23	312	377	381	341	383	398	491	338	358	331	104	200	190	265	228	331	368	304	361	384	377	439	260	502	336	292	357	291	334	316	364	309	498	387	185	174	221	169	272	247	278	231	225	403	476	503	363	312	388
852168.SRO77	83	109	182	154	112	80	157	169	182	240	87	153	130	170	164	267	98	135	89	110	145	162	42	90	83	95	226	162	135	166	192	74	163	131	131	270	192	94	63	153	130	68	157	79	122	110	126	133	175
852169.PKC1	466	528	868	586	307	286	521	633	669	617	201	601	341	535	530	830	392	1044	553	111	86	83	284	594	412	411	790	576	549	792	835	297	620	408	454	754	656	422	355	569	576	456	664	453	563	517	407	490	413
852170.SEA4	184	184	292	205	129	162	178	211	287	292	56	239	102	145	164	202	155	343	227	83	72	107	88	226	150	166	249	251	146	248	210	120	213	139	171	264	227	190	161	233	224	164	264	156	231	191	195	211	238
852171.RTG3	200	208	309	201	136	136	211	255	215	258	98	211	145	165	174	264	88	174	115	33	22	37	107	232	142	249	324	264	220	247	288	119	198	149	186	330	282	156	139	228	226	219	255	180	267	238	129	144	120
852172.SFT2	313	309	418	402	328	363	430	181	269	243	237	279	246	277	290	390	160	183	148	47	54	55	535	473	452	322	332	314	525	440	615	358	586	375	339	368	414	253	310	391	306	329	352	318	384	369	256	208	253
852173.ECM21	184	184	247	155	89	50	127	459	420	476	58	301	117	96	113	172	224	490	303	109	114	87	75	182	125	202	348	284	128	196	148	83	144	95	146	201	205	84	64	120	169	146	192	82	102	114	300	284	272
1466439.YBL101W-C	2	8	1	5	3	0	2	0	0	0	1	0	1	2	1	0	0	0	2	0	2	1	3	3	3	0	0	1	3	0	0	4	4	3	4	1	0	1	0	0	2	0	1	1	1	3	2	2	0
852175.YBL101W-B	634	631	835	98	122	100	110	0	0	0	0	0	0	224	213	285	0	0	0	0	0	0	439	1255	768	175	218	182	258	315	341	27	67	38	28	41	71	94	157	140	28	32	51	33	36	30	0	0	0
852174.YBL101W-A	0	0	0	0	0	0	0	0	0	0	0	0	0	0	0	0	0	0	0	0	0	0	0	0	0	0	0	0	0	0	0	0	0	0	0	0	0	0	0	0	0	0	0	0	0	0	0	0	0
852177.ATP1	2400	2581	3081	1840	1781	1764	2380	2662	3369	4003	783	3353	1280	2020	2213	2898	1322	1968	1587	178	194	207	1424	2185	1437	1161	1339	1141	2487	3126	3043	2067	3539	2438	1328	2771	1680	902	2302	1078	2698	2512	2826	3498	3618	3790	1484	1548	1433
852179.BNA4	1143	1151	1667	984	692	604	925	801	1075	1121	566	663	873	796	722	1075	553	1292	691	1021	1054	1117	308	456	369	639	924	715	521	498	647	631	1070	831	720	711	1010	455	390	546	1252	1029	1283	520	600	566	672	632	654
852180.BRN1	50	36	80	38	20	14	42	123	101	98	7	87	50	37	44	65	82	210	108	13	10	22	19	35	22	52	56	56	51	38	58	31	40	25	43	66	69	24	24	38	61	46	69	23	44	35	102	111	95
852181.MRX3	197	176	285	218	170	172	203	328	623	675	221	394	357	254	233	320	107	377	134	345	351	399	265	244	271	80	156	101	643	400	842	342	683	460	197	308	228	79	162	108	262	153	202	314	349	318	231	222	237
852184.ROX3	563	538	758	549	454	429	623	396	331	347	225	339	242	298	272	415	320	617	362	200	223	259	460	499	480	553	783	623	441	487	506	223	436	332	457	431	474	608	475	620	665	604	722	468	724	498	386	393	372
852185.RPL32	16366	17850	15394	15273	20356	22239	18108	13499	15654	14815	22515	14938	20172	12888	13368	13110	12371	5594	10590	3394	3603	3986	17468	16895	13272	17019	14702	12644	9601	14387	8878	18542	21139	15039	16455	15613	15603	16266	15839	15236	18402	17850	13553	17440	18050	13586	12513	13347	12762
852186.SCS22	104	80	150	161	111	103	165	133	171	191	68	163	105	111	116	160	89	92	117	125	96	127	102	116	150	72	119	88	70	122	115	86	170	116	112	113	146	90	73	102	121	111	120	120	107	131	202	170	187
852187.MAP2	1033	1003	1583	1329	692	723	1147	1485	1497	1825	545	1312	931	1138	1001	1602	630	1939	1005	310	333	377	661	1060	914	977	1530	1136	832	1704	1245	610	1305	937	951	1487	1435	839	847	1229	1023	855	1184	980	1438	1265	900	988	859
852188.MRP21	402	380	497	435	581	612	678	727	791	761	342	683	440	234	245	317	546	1024	617	202	195	226	439	567	501	197	268	198	313	336	472	420	546	484	241	292	290	248	302	309	366	293	365	459	531	493	388	480	471
852189.AVT5	143	142	208	175	131	125	184	198	241	252	182	269	299	93	135	173	92	236	163	244	263	282	135	170	132	104	169	123	120	181	210	123	186	124	104	154	157	94	115	105	139	131	163	125	160	142	172	173	198
852190.TEL1	268	227	353	200	143	161	214	165	224	245	76	245	102	258	241	404	178	264	221	604	664	739	108	276	169	205	356	278	158	289	221	159	295	202	186	267	286	167	195	245	190	192	254	208	261	247	280	294	268
852191.RPL23A	6756	6981	6908	7575	9546	10178	9169	5793	7090	6931	9872	5782	8757	5424	4791	5493	4632	4953	4479	2401	2412	2791	10164	6345	6762	5538	5726	4727	5072	7155	5447	9755	11673	8723	7011	6660	6910	7624	7169	7730	7037	6349	5687	7689	7713	6228	7149	7697	7146
852192.None	54	68	80	63	48	43	73	121	190	197	79	181	94	110	116	189	108	140	133	21	16	22	69	108	94	59	76	63	112	161	120	61	124	65	70	103	103	40	53	63	116	90	102	98	78	77	141	139	121
852193.BOI1	543	449	666	438	302	245	370	506	455	467	170	474	278	481	430	559	286	584	422	308	319	358	207	510	341	503	723	558	363	564	520	277	455	291	378	715	551	358	354	479	490	309	390	448	566	491	324	346	321
852194.CDC27	209	194	250	149	95	92	117	135	117	144	33	105	40	148	130	164	74	131	134	61	35	42	84	148	106	127	149	117	149	174	190	79	150	94	150	176	153	114	108	141	153	132	152	128	159	147	129	107	121
852196.ALG3	264	243	430	383	259	225	450	461	413	478	118	327	238	169	213	348	245	959	415	43	30	58	231	261	246	298	542	388	249	529	391	204	402	299	218	344	394	276	222	378	437	356	520	226	370	276	263	300	302
852197.None	360	362	468	264	173	142	230	371	189	214	36	176	59	173	186	194	200	527	395	85	99	128	101	124	114	292	429	322	130	424	212	76	189	96	283	329	343	320	243	363	377	372	400	270	382	266	323	331	310
852198.PET112	81	69	126	94	71	51	79	405	394	351	53	343	138	79	66	96	284	712	390	78	77	76	44	103	82	54	65	53	61	101	118	45	72	67	58	84	67	33	39	58	85	84	87	61	73	84	182	220	200
852199.NUP170	549	457	726	526	399	344	523	618	620	657	174	593	256	440	404	585	578	912	789	529	577	682	219	512	365	465	670	515	478	612	658	308	618	439	502	672	527	456	391	628	605	499	691	408	632	483	534	577	584
852200.ATG8	90	100	129	133	65	99	84	98	129	141	81	149	72	166	169	196	28	37	27	3	4	6	63	105	85	104	93	72	128	60	151	156	191	155	66	123	87	50	56	60	57	66	47	74	46	71	97	94	102
852202.ILS1	1757	1646	2359	2659	1515	1386	2043	2371	2150	2495	1076	1983	1515	2095	1866	2917	1990	2640	2529	613	598	673	1346	2263	1604	2548	3477	2805	2053	3181	3081	1422	2386	1737	2510	3563	3275	2452	2103	3225	2919	2365	2961	2285	3231	2571	2009	2220	2240
852203.SSA3	145	156	171	121	66	46	110	130	109	138	22	123	55	103	105	177	43	209	91	87	94	85	49	107	80	177	274	148	141	150	200	60	111	83	107	156	133	76	84	112	147	142	182	114	99	122	58	72	71
852205.AAR2	54	49	63	37	30	46	38	37	29	36	2	25	7	37	30	57	21	24	30	3	12	7	9	39	17	41	69	57	37	54	59	28	46	35	44	53	34	47	17	31	48	35	53	39	35	30	20	14	20
852206.RPS8A	11458	11984	11771	11555	14939	15576	15399	13248	17434	15934	18191	18185	19695	10982	10532	12231	12497	10142	11975	10059	10098	11100	12763	10490	9771	13789	14215	11969	6277	10400	7295	12802	15874	11935	14395	14142	14724	14269	14923	15732	14923	13442	12900	11026	12395	9985	13245	13761	13298
1466440.None	0	2	2	5	5	0	3	1	1	3	1	4	4	3	1	2	0	1	0	0	0	0	0	0	0	0	2	0	3	1	1	0	4	2	0	0	5	3	3	2	3	0	0	2	4	1	0	0	3
852207.KTI11	225	248	203	151	149	154	157	147	140	147	136	120	153	95	89	104	137	86	127	23	18	25	114	109	109	108	144	97	114	171	132	130	166	121	158	193	169	125	132	121	173	163	174	167	219	129	120	97	115
852208.None	172	177	189	159	107	159	119	12	12	7	2	3	8	61	75	77	18	14	14	112	89	120	140	113	118	113	137	134	176	187	206	101	136	94	140	123	176	154	121	166	169	132	171	109	160	106	20	28	21
852209.AST1	261	260	418	285	226	197	366	362	414	383	194	361	214	188	189	325	369	588	420	208	231	270	187	362	257	121	238	172	145	288	245	299	565	377	149	154	222	221	247	262	234	219	283	352	386	366	351	410	432
852211.PRS4	615	607	759	641	478	434	642	612	564	542	314	505	410	490	375	610	539	785	678	311	302	336	447	507	498	449	625	476	400	706	596	404	740	518	500	599	600	616	489	783	599	491	604	538	811	620	490	544	519
852212.UBP13	431	438	549	526	320	277	512	548	587	601	241	521	362	449	387	676	285	865	380	182	191	202	281	683	555	450	644	498	382	507	655	330	601	423	469	631	595	451	319	546	339	298	443	401	546	511	295	269	296
852214.SEF1	153	100	188	74	81	83	138	201	172	185	10	190	29	106	69	155	139	241	191	21	25	26	29	103	54	49	96	79	94	199	169	57	148	107	60	110	80	75	58	85	177	119	201	88	138	126	118	137	111
852215.PRX1	163	149	189	392	196	177	257	484	731	884	268	459	389	192	182	263	231	364	223	19	24	14	252	252	246	55	63	69	355	212	445	270	391	257	148	231	171	93	257	83	364	267	293	434	237	484	197	203	201
852216.KIP1	125	89	155	104	77	86	115	68	66	63	25	139	51	63	54	67	56	102	87	111	98	110	53	152	91	74	129	97	121	81	148	76	103	67	52	75	102	42	55	60	117	87	142	84	105	98	90	123	93
852218.SKT5	511	476	622	415	342	352	475	398	350	380	130	374	193	372	362	496	386	1074	550	209	235	222	223	493	356	315	398	337	368	437	447	268	362	305	359	470	418	407	357	535	548	467	535	413	469	403	544	495	515
852219.YEL1	169	182	234	148	126	124	156	155	150	136	61	199	96	118	128	182	137	317	183	78	75	84	104	242	177	114	166	150	196	177	313	81	163	93	148	172	123	121	83	136	182	141	216	130	174	162	158	159	170
852220.CMC2	209	251	247	191	223	271	223	179	247	181	138	205	131	151	147	145	235	55	198	60	45	44	194	244	207	104	80	69	166	104	166	272	299	260	101	124	111	115	118	99	195	217	181	176	135	159	187	177	165
852221.None	103	142	169	88	135	132	121	81	112	112	59	123	71	70	81	79	91	199	81	161	179	178	113	147	152	61	73	53	78	95	116	133	163	152	64	65	83	60	66	73	69	84	108	104	97	90	93	114	94
852222.SHP1	636	706	952	793	430	401	682	669	733	677	184	852	302	730	725	1084	460	959	615	194	205	198	448	663	540	767	1165	896	909	894	1280	398	679	509	683	993	967	439	487	552	780	598	817	603	703	729	665	707	663
852223.PTH2	397	461	506	394	466	506	466	419	566	470	580	428	642	330	318	378	251	421	273	320	284	379	572	445	436	285	347	293	535	439	653	431	568	411	383	371	392	373	345	426	384	334	333	325	405	357	359	432	334
852224.PTC3	884	838	1158	937	723	689	933	1067	1048	1188	558	1037	810	863	768	1096	653	1000	885	213	202	234	603	1091	797	736	1033	773	723	989	933	533	936	672	800	1042	1068	712	740	966	850	772	974	773	1028	938	863	832	881
852225.None	400	425	581	362	408	360	449	316	425	433	215	316	322	450	528	600	188	329	217	395	429	463	483	515	409	499	553	466	413	554	570	361	515	384	244	247	289	576	399	681	455	396	469	335	426	386	370	365	356
852226.TOD6	496	418	660	548	344	354	560	452	294	252	93	240	160	283	249	387	506	763	635	214	233	255	186	402	264	364	612	475	354	713	503	153	259	203	431	450	572	602	410	827	688	556	721	431	857	503	312	325	315
852228.SAS3	182	180	255	196	161	145	184	202	143	160	35	105	79	160	140	201	119	141	141	14	18	23	68	208	116	187	241	206	201	204	254	80	135	115	166	268	219	141	129	185	217	188	226	169	184	155	110	134	112
852229.PIN4	380	289	524	334	220	186	350	874	576	622	58	794	132	248	219	382	643	1439	909	6	8	11	123	299	216	277	444	315	194	444	263	187	416	281	234	378	387	496	228	714	731	642	844	207	361	312	642	724	647
852230.SEC17	594	545	698	766	634	622	750	506	587	549	337	600	470	595	529	728	291	506	354	173	208	215	565	775	620	508	589	457	752	618	896	620	861	678	499	678	667	437	512	540	616	551	583	660	677	597	409	444	473
852231.MOH1	55	50	52	102	39	33	52	72	100	107	67	58	78	31	46	42	25	31	36	42	44	36	23	46	42	41	47	32	79	50	85	37	57	34	39	52	32	33	33	44	32	39	28	40	55	37	35	41	40
852232.RRT1	27	22	21	44	16	18	13	0	1	9	4	0	5	14	13	17	0	7	7	0	1	0	10	21	8	19	16	10	22	9	28	10	33	14	11	12	13	18	18	16	20	16	8	22	23	16	3	7	7
852233.EDE1	675	645	932	859	461	419	649	809	1093	1049	693	1551	995	1012	848	1321	594	1040	805	372	454	491	615	1014	786	1033	1562	1193	663	1130	1056	594	1064	756	826	1107	1118	606	562	893	694	574	701	639	684	761	1052	1162	1036
852234.PSY4	190	201	324	206	137	133	232	223	156	172	54	146	71	201	202	343	137	394	174	29	28	43	103	201	176	210	276	195	112	246	222	65	143	115	174	251	249	228	165	369	286	238	270	137	250	164	150	149	135
852235.COR1	1651	1576	2089	860	1077	861	1337	1726	1729	2109	349	1970	656	1251	1270	1779	982	2077	1164	139	172	186	1167	1338	1125	531	730	576	1517	1893	2212	1359	2128	1533	566	1344	705	441	1283	532	1913	1545	1822	2544	2592	2643	806	853	771
852236.None	7	6	7	1	0	5	3	1	2	0	1	2	0	5	4	5	0	3	0	1	1	7	8	2	4	1	0	6	25	9	29	18	24	10	4	3	4	9	4	4	53	40	35	2	9	1	3	3	1
852237.ECM13	26	12	22	20	10	10	5	103	99	116	52	52	47	48	44	50	62	123	93	1239	1414	1511	12	29	14	11	18	18	34	13	54	25	72	48	18	11	20	5	13	3	189	157	187	11	2	5	227	208	195
852238.FUI1	2406	2218	3719	2544	1573	1547	2582	2769	2159	1860	1066	2259	1537	1089	1141	1750	2493	5666	3747	4171	4290	4761	1897	2369	2222	2611	4168	3129	947	2905	1429	1171	2238	1606	1864	2130	2878	2755	1691	3499	1423	1219	1662	1373	3615	1723	2606	2647	2720
852239.PRE7	1299	1317	2051	1524	1054	1023	1672	1355	1543	1269	527	1866	821	1216	1050	1637	974	2223	1413	355	396	438	1394	2118	1721	1622	2430	1834	1200	1514	1753	859	1633	1185	1173	1300	1679	980	866	1346	1107	1003	1350	1124	1568	1406	1459	1493	1491
852240.ERD2	703	782	706	850	964	1135	976	969	1227	1107	1847	1233	1918	823	880	928	480	512	447	293	308	289	1552	1425	1227	661	702	596	1723	917	1854	1560	1727	1252	878	1013	805	538	580	557	613	627	521	635	676	535	790	862	839
1466441.YBL039W-A	124	167	160	205	168	219	191	119	183	215	175	118	200	271	239	231	25	27	16	6	13	6	293	336	295	150	161	106	480	230	515	372	533	350	226	260	209	134	113	135	108	95	79	141	116	123	17	19	10
852241.URA7	2160	1918	2885	2127	1482	1305	2208	2111	1448	1477	751	1609	952	1141	993	1578	2466	3719	3115	357	442	478	924	1464	1202	1603	2374	1853	1669	2423	2482	899	1673	1174	1672	2352	2387	2324	1581	3134	2078	1725	2366	1489	3409	1744	1429	1493	1508
852242.MRPL16	350	372	397	278	375	344	423	375	323	378	138	495	178	314	305	413	375	578	470	68	51	57	257	418	330	154	179	166	424	372	463	329	487	330	235	274	263	202	264	239	369	360	370	363	432	438	244	255	255
852243.APL3	201	211	253	223	165	136	200	284	344	327	134	346	214	153	187	284	182	261	242	269	274	294	84	193	144	164	245	212	168	241	232	122	233	175	171	258	216	162	133	217	218	199	255	132	199	181	239	303	244
852244.None	501	601	584	443	327	369	438	344	395	360	330	334	346	348	332	485	298	263	320	227	287	259	502	603	462	452	489	420	765	450	789	379	490	394	479	514	507	472	386	529	510	499	512	459	500	425	309	330	335
852245.POL12	240	218	278	199	166	161	232	195	105	98	48	108	74	92	100	149	108	285	177	151	148	183	150	220	153	161	223	172	124	219	174	101	179	121	175	239	221	207	146	256	256	232	215	167	165	168	165	166	161
852246.STU1	169	156	204	130	62	71	92	115	113	96	24	114	52	102	88	123	103	118	139	180	202	187	58	175	96	134	159	142	96	111	122	40	73	59	133	162	118	113	83	142	172	117	170	67	126	75	128	152	171
852247.RIB1	371	391	609	454	269	233	335	498	460	464	80	379	146	204	234	387	211	797	382	32	24	46	228	264	249	314	446	345	201	463	315	191	390	276	334	388	386	323	321	547	451	324	505	379	647	423	408	423	420
852248.HEK2	427	406	700	564	409	423	619	772	856	927	243	984	427	326	348	487	606	1742	903	140	136	160	320	485	398	528	781	588	524	616	683	226	454	305	468	570	599	348	354	449	618	524	706	474	717	610	713	752	690
852249.SHE1	88	87	131	73	65	66	86	75	79	82	53	89	72	55	60	66	85	82	73	30	17	21	47	99	72	94	117	90	86	80	109	64	97	72	69	96	100	75	51	99	91	85	81	75	115	81	87	96	93
852250.PET9	1940	1970	2743	1632	1585	1462	2177	3275	3385	3726	577	3175	1136	1090	1134	1898	1538	4055	2361	284	247	246	1023	1564	1335	734	973	808	2014	2923	3091	2027	3898	2672	1096	1795	1456	654	1614	898	2798	2660	3536	2920	2956	3325	1628	1827	1777
852251.None	139	148	159	133	157	205	117	200	373	407	173	245	217	109	96	106	48	27	44	6	3	6	238	220	180	76	83	49	186	110	229	177	194	137	105	86	97	112	120	97	164	176	126	120	129	113	83	95	109
852252.None	189	184	182	134	103	123	100	468	495	572	240	391	266	103	104	106	271	287	295	47	51	55	92	130	104	57	86	61	103	84	139	132	214	168	74	115	81	139	145	107	303	264	260	193	320	194	315	317	323
852253.None	735	783	783	852	1029	1122	1086	552	434	384	359	382	436	255	193	201	735	584	712	186	195	208	647	977	719	784	837	677	551	471	651	397	576	439	726	588	742	1038	749	1150	930	756	819	643	1015	554	492	556	540
852254.RPL19B	12402	13046	12854	13069	14791	15478	15406	10854	12698	12372	14775	12533	15310	9617	9620	10499	10342	12744	10028	3613	3618	4044	12724	14670	11875	11791	12074	10079	6714	12788	6695	11377	15567	11222	12153	12767	13154	12386	11539	12939	13518	12288	11913	13730	15012	12101	9352	9531	9432
852255.LSM2	509	608	480	491	634	725	518	471	435	491	607	370	510	376	322	385	321	48	275	669	686	761	464	518	450	281	263	259	395	310	422	369	487	342	374	321	383	419	409	406	507	471	357	502	473	378	492	525	526
852256.RRN10	98	107	212	177	141	139	189	111	130	131	71	122	86	81	81	139	62	368	157	48	47	53	145	223	202	99	141	112	145	160	201	125	227	133	118	130	156	86	87	131	104	93	136	107	142	131	94	103	93
852257.NCL1	1067	993	1433	1051	886	850	1179	1631	1337	1480	484	1034	716	621	634	868	1483	2613	2072	741	755	799	440	906	644	832	1173	891	601	1143	867	449	751	492	925	1251	1216	1262	867	1463	1295	1094	1405	978	1552	1068	1230	1415	1314
852258.MCM2	342	322	465	344	172	144	323	502	332	434	84	366	171	241	240	344	224	559	398	99	115	118	158	259	174	333	472	389	240	404	403	164	293	194	266	408	356	236	213	278	397	363	415	249	339	289	228	261	288
852259.PIM1	779	684	1088	649	427	349	644	808	871	694	54	1110	183	627	601	910	431	1280	726	401	381	396	231	510	410	571	908	693	529	695	787	301	496	412	550	772	749	321	444	491	682	556	836	683	726	805	649	603	629
852260.HAP3	162	167	193	149	141	156	160	121	134	156	21	132	66	69	74	105	77	177	97	41	46	64	80	125	114	80	117	92	115	183	147	99	144	120	77	95	111	93	80	95	117	99	127	118	169	128	88	101	100
852261.RFT1	420	364	510	427	318	292	439	408	550	457	322	535	494	295	305	444	349	798	511	317	346	376	286	467	362	269	322	323	405	463	518	353	648	492	294	517	421	295	271	380	405	352	420	316	513	427	377	415	379
852262.APN2	146	142	166	136	96	107	153	164	185	199	70	214	119	110	120	177	177	342	256	661	792	840	108	176	114	86	118	86	116	109	181	117	205	123	74	129	88	80	75	93	126	79	121	105	116	117	317	316	291
852263.POP8	160	216	247	244	233	289	295	389	500	542	385	345	463	143	116	175	194	173	243	351	360	453	200	283	207	80	130	106	143	170	157	164	257	192	153	146	217	192	142	222	215	167	204	130	218	147	302	304	298
852264.PEP1	662	613	860	889	575	559	802	622	1006	1045	476	881	746	1029	1072	1431	484	902	649	955	933	1134	851	1356	1046	861	1240	936	1064	1177	1531	718	1117	785	789	1083	1021	713	573	885	641	517	712	676	700	743	792	853	822
852265.FUS3	3	4	2	319	594	598	756	15	25	27	7	6	17	4	2	6	1	6	1	4	2	2	336	394	353	5	3	7	5	4	8	4	9	2	2	2	2	4	7	12	0	3	1	2	7	5	6	1	0
852266.ACH1	93	91	135	122	75	64	113	284	292	348	56	385	120	104	82	112	65	168	99	61	70	72	52	73	62	79	105	93	144	144	205	84	134	98	65	71	72	32	93	48	138	117	138	199	150	241	275	292	262
852269.RRN6	258	231	388	256	188	173	241	369	265	315	87	263	168	143	132	203	316	656	432	121	136	150	112	246	167	216	289	248	201	291	320	114	216	147	211	265	272	224	182	316	241	205	310	203	377	219	257	286	238
852270.FMT1	11	16	40	28	7	16	23	29	30	26	2	31	12	13	9	33	19	64	30	2	1	2	5	13	7	8	31	18	22	30	41	6	18	12	18	51	28	10	11	9	13	7	20	7	28	20	17	35	22
852271.SCT1	518	411	574	388	305	264	395	900	826	887	357	709	583	277	243	369	382	806	570	102	88	87	256	338	274	358	595	440	323	402	448	186	331	251	362	401	431	224	320	326	458	357	498	496	525	489	646	678	640
852273.None	121	150	148	145	76	82	98	136	112	112	57	111	72	46	70	80	93	146	110	31	22	28	95	157	110	101	117	80	105	107	122	68	84	81	111	132	118	98	69	103	85	96	64	89	121	79	99	108	92
852274.ALK2	255	230	371	229	205	213	319	206	171	185	191	195	185	120	135	156	131	254	187	338	413	406	248	401	299	166	210	203	239	203	287	108	206	137	198	203	252	228	166	283	307	254	299	181	297	199	189	183	147
1466442.None	0	1	3	1	0	1	1	8	5	3	0	4	1	0	1	0	4	1	4	26	24	51	0	0	0	0	1	0	1	1	0	1	2	2	0	0	0	0	1	2	0	0	0	0	0	0	6	7	6
852275.HIR1	261	197	299	146	158	110	207	146	154	141	45	137	58	130	124	186	115	230	160	122	112	140	78	164	119	130	205	163	141	225	191	115	179	124	144	173	230	135	109	177	220	184	223	161	210	179	156	189	152
852276.SLA1	657	577	888	859	529	411	745	1007	1132	1133	462	1093	714	675	624	1055	375	987	585	140	160	132	593	835	668	740	1041	801	782	1308	1200	493	956	683	733	935	901	487	487	733	701	590	781	553	700	706	773	801	811
852277.LDB7	417	396	628	688	392	403	701	436	434	428	223	311	287	417	353	645	216	644	283	57	70	93	929	748	951	452	619	514	474	691	839	604	1043	870	524	568	780	426	348	712	505	334	569	407	594	538	238	273	235
852278.PDR3	133	131	140	135	95	88	104	160	172	197	26	151	41	115	110	167	78	135	101	46	32	44	61	138	101	93	128	116	150	166	189	70	169	120	107	162	116	92	103	112	130	119	182	131	164	148	101	120	91
852280.None	790	729	975	718	1135	932	1385	393	407	500	61	294	144	194	187	286	122	209	168	5	10	6	70	175	110	0	0	0	247	253	341	65	123	77	0	0	0	0	0	0	0	0	0	67	67	77	58	90	73
852279.None	0	0	0	0	0	0	0	0	0	0	0	0	0	0	0	0	0	0	0	0	0	0	0	0	0	0	0	0	0	0	0	0	0	0	0	0	0	0	0	0	0	0	0	0	0	0	0	0	0
852282.UTP20	864	839	1154	890	473	474	696	703	711	832	112	537	245	639	622	923	842	1519	1200	164	167	157	199	542	305	762	1062	782	467	782	723	355	669	451	789	759	907	977	763	1276	920	752	1021	642	1059	663	444	434	428
852283.HTA2	4375	4904	5431	5469	5656	6786	7096	4668	6119	6246	6633	4526	7702	4384	3801	5234	2816	4638	3138	1689	1677	1961	8342	9259	8724	2817	3376	2692	5995	4023	7277	5253	8185	6181	4616	3760	5777	5468	5942	6296	3974	3793	3944	7058	8758	7410	3891	4028	3916
852284.HTB2	2329	2373	3347	2709	1537	1744	2417	1719	1463	1695	1493	1206	1459	2227	2046	3009	1385	498	1224	360	351	383	2278	2765	2386	2077	2671	2168	2770	2173	3510	1624	2723	1810	2481	2740	3359	2282	2892	2977	2312	2018	2404	4205	6219	4371	1123	1177	1158
852285.ECM15	506	540	552	757	718	874	713	456	707	608	652	438	531	489	462	573	236	71	177	117	95	124	717	666	623	350	390	342	624	479	744	750	1018	797	460	351	530	425	441	430	562	461	519	582	592	556	309	342	317
852286.NTH2	111	119	206	130	99	116	138	101	89	106	32	106	52	112	104	197	31	59	36	32	47	41	79	102	116	84	137	106	162	141	240	101	155	128	87	106	123	50	61	67	126	91	147	90	80	104	37	64	65
852287.RER2	605	656	1043	693	540	502	857	608	459	424	235	472	378	413	358	639	473	1136	636	230	265	249	547	925	771	429	723	489	545	832	921	381	738	633	504	673	751	606	516	986	558	476	739	539	942	733	529	617	497
852288.COQ1	237	260	268	189	244	228	281	282	348	385	89	465	147	241	213	305	261	383	309	60	61	86	173	318	214	105	132	122	251	243	330	192	323	228	152	240	174	107	144	133	281	255	254	290	265	275	320	355	314
852289.GPI18	432	397	471	383	342	356	433	358	480	485	302	470	407	634	593	770	454	355	435	186	204	217	333	503	379	391	498	415	931	534	1174	493	706	524	403	612	440	418	345	405	361	373	366	458	357	439	317	300	326
852290.RCR1	707	713	1111	1380	916	879	1418	1253	2127	2039	715	2190	1197	1347	1208	2062	1121	3221	1588	100	93	122	1845	2140	2138	1707	2864	2318	2537	2328	4124	1598	2982	2268	956	1862	1494	1514	1042	2145	480	407	604	970	769	1178	862	848	812
852291.UGA2	112	120	141	109	105	87	110	158	231	215	52	271	87	164	172	215	116	184	169	46	46	36	95	95	77	72	105	63	200	113	239	190	303	241	92	131	87	65	109	72	118	112	88	184	141	156	176	177	194
852292.DSF2	121	140	179	114	80	73	121	164	195	167	95	188	135	217	165	266	148	235	152	100	99	117	94	158	141	91	137	114	153	135	234	76	147	90	99	137	121	123	70	105	212	172	193	89	106	91	204	192	193
852293.FLR1	194	179	279	240	140	133	174	192	205	236	24	183	62	231	234	351	100	176	165	118	115	139	144	207	161	171	238	204	262	245	393	165	256	189	125	227	159	171	149	230	208	148	262	191	221	208	112	132	113
852294.HHF1	3679	3819	3931	3231	3412	3632	3584	4807	5971	5696	5290	5631	6100	2412	2075	2539	2855	5101	3031	1577	1626	1772	3429	4371	3572	2409	2507	2083	4786	2972	5598	2535	3809	2761	3340	3002	3484	2641	3478	2771	3050	2651	2498	5265	5843	4928	3786	3832	3746
852295.HHT1	5235	5174	6151	6668	7293	7984	8697	7341	8616	8730	8326	6652	10844	3194	2720	3625	3863	10929	4337	2158	2311	2551	7576	8947	7701	2746	3218	2653	6633	4260	8770	4757	7632	5787	5328	4624	6212	3978	5373	4971	4622	4217	4520	7281	7906	7002	4977	5052	4990
852296.IPP1	3756	3702	4846	3711	2742	2791	3557	3354	3667	4091	2340	3302	2855	4028	4215	5412	2780	1781	2710	2823	3203	3452	2567	2941	2689	3844	4755	3825	3655	4801	4591	2189	3830	2622	3606	4693	4213	3251	3295	3959	4023	3479	3853	4338	5340	4517	3581	3720	3378
852299.None	380	289	405	618	181	140	211	80	73	79	3	46	7	53	36	62	57	86	62	0	3	0	15	48	34	0	0	0	71	38	108	18	36	32	0	0	0	0	0	0	0	0	0	38	43	34	23	35	23
852298.None	0	0	0	0	0	0	0	0	0	0	0	0	0	0	0	0	0	0	0	0	0	0	0	0	0	0	0	0	0	0	0	0	0	0	0	0	0	0	0	0	0	0	0	0	0	0	0	0	0
852300.None	46	40	54	23	38	28	37	178	171	189	88	42	119	23	33	37	8	12	9	22	28	41	39	70	54	16	31	27	81	45	118	38	53	40	25	32	35	29	17	19	38	23	28	20	24	23	0	0	0
852302.GRX7	262	308	251	228	251	281	279	417	577	540	671	304	766	256	205	240	241	187	200	197	150	195	352	424	348	167	189	155	367	270	385	270	372	277	201	295	213	180	176	189	322	297	257	195	194	207	325	306	335
852303.MNN2	798	743	939	696	478	411	626	845	1137	1155	736	1071	961	661	696	879	681	1662	1092	699	656	770	412	662	475	559	759	592	716	944	1038	519	828	607	672	937	767	543	435	654	969	820	967	605	717	667	995	1045	1039
852304.None	1124	1104	1197	1443	708	824	825	1608	1920	2072	1204	1333	1490	1361	1373	1783	703	1175	718	73	63	77	1186	1398	1075	2157	2612	2117	1239	1405	1479	1123	1480	1072	1724	2189	1800	1040	735	1160	849	761	659	756	894	679	700	807	791
852305.KAP104	830	695	1165	874	555	507	840	960	984	1053	310	797	494	655	634	926	841	1602	1051	408	442	451	454	645	514	758	1043	866	798	1026	1073	409	813	527	731	1073	954	793	656	1001	936	771	973	671	1037	747	905	940	863
852306.GAL7	10	7	7	352	1221	1097	1163	13	30	16	9	29	24	6	6	16	27	57	32	29	23	54	15	17	12	5	4	4	28	21	42	14	7	7	3	1	0	1	3	0	3	4	1	8	2	5	21	28	24
852307.GAL10	33	14	20	802	2010	1635	2389	75	103	95	86	120	59	17	12	23	85	88	114	440	446	562	26	31	25	23	14	15	30	27	41	9	23	10	25	19	22	8	15	19	24	15	19	12	23	19	184	184	189
852308.GAL1	40	23	51	567	1248	1320	1608	48	46	42	6	75	26	25	26	43	81	133	106	70	78	75	22	65	41	29	49	51	130	73	233	15	45	22	36	70	23	28	19	32	29	19	52	39	44	21	68	56	49
852309.FUR4	483	441	684	420	334	296	446	829	640	760	211	597	436	320	320	455	562	1216	763	152	162	191	185	264	267	245	354	291	324	642	580	176	418	298	301	618	414	460	297	663	381	340	429	217	556	298	485	502	452
852310.POA1	193	241	263	246	299	284	344	149	142	169	72	137	112	255	195	257	115	181	135	182	202	240	285	312	275	182	177	187	226	209	308	322	423	364	183	223	216	204	161	230	203	197	177	198	248	164	113	104	115
852311.CHS3	806	762	1192	729	641	553	952	502	495	505	162	432	264	601	592	929	336	620	502	207	245	287	442	655	538	512	751	635	582	847	863	276	605	453	471	796	665	526	370	727	832	694	1006	497	578	555	453	372	410
852312.SCO2	123	116	150	120	109	128	133	178	238	229	47	222	95	149	123	191	145	239	189	92	119	126	140	250	205	68	83	62	124	131	144	134	193	133	89	145	81	53	79	65	117	110	137	141	117	111	198	207	173
852313.OLA1	3992	4105	5279	4612	3581	3374	4501	4251	4499	4822	2311	3693	3398	3513	3318	4558	3419	5039	3897	7047	8091	8245	2010	3366	2515	3853	5095	4081	3523	4118	4805	2823	4643	3334	4191	5307	5254	4835	4287	5540	4808	4117	4887	5146	6667	5660	4055	4318	4183
852314.ETR1	115	102	128	97	106	103	121	124	178	171	49	327	84	157	149	198	83	120	126	102	121	159	104	157	104	56	76	64	257	286	334	169	198	176	75	120	91	66	102	78	107	94	107	93	87	99	177	184	160
852315.None	4	5	0	1	0	4	1	0	0	0	0	0	0	2	2	1	0	0	0	10	10	14	1	4	0	5	1	2	4	1	4	5	3	1	0	0	1	1	2	0	2	2	2	2	0	1	0	0	2
852316.YPK3	277	265	384	242	236	185	332	327	304	347	112	262	208	130	133	219	222	523	279	59	94	91	167	358	232	235	387	238	262	363	440	142	292	204	177	310	244	179	172	221	246	232	311	218	339	262	252	283	262
852317.CDS1	545	504	675	570	366	393	510	597	1085	1090	832	1020	1004	787	784	1148	667	832	807	155	163	192	260	475	334	304	462	335	507	656	640	695	1085	780	545	1425	656	548	378	644	672	581	693	355	597	343	618	603	570
852318.RKM3	295	204	346	310	223	204	346	284	445	490	201	426	384	280	208	352	323	703	442	65	69	66	178	343	273	141	258	191	464	418	696	222	452	324	258	535	367	253	158	318	324	242	293	162	289	213	244	321	265
852319.RPL4A	16120	14700	23713	21676	11017	10526	16083	13412	12573	13800	2780	7267	4687	10144	10357	14740	4278	11403	6050	9908	11029	11519	9437	12265	10708	14927	22628	17570	7621	17278	10624	8389	17561	12320	13207	15148	18393	11985	12365	16224	14350	11659	15571	19061	23999	22311	7870	8181	7920
852320.None	4	8	7	6	14	10	6	1	6	3	1	1	1	12	10	4	1	2	0	5	5	5	4	5	6	5	7	8	14	15	27	1	9	1	4	2	5	4	5	3	9	3	3	3	7	2	3	5	1
852321.EDS1	98	84	102	86	72	69	72	213	120	143	21	63	70	91	91	139	82	162	97	103	134	109	56	68	71	70	83	89	78	116	83	64	110	80	66	92	67	77	60	68	92	60	95	59	75	87	60	79	65
852322.HMT1	1738	1738	2575	1602	1441	1408	2058	1306	1004	1008	420	1013	574	704	724	1027	1608	2595	2131	230	225	226	681	1250	1042	971	1345	1059	768	1896	1082	734	1363	973	949	1173	1411	1630	1266	2099	1591	1336	1713	1450	2727	1825	1178	1366	1302
852323.PDX3	624	580	848	763	585	573	808	829	1006	939	719	1119	874	813	835	1084	342	1368	480	120	133	172	862	856	806	625	947	680	1063	1075	1438	771	1171	961	552	816	781	661	546	817	757	608	736	688	821	823	811	816	728
852324.CSG2	906	882	1318	1465	834	758	1220	1050	1332	1372	855	1770	1056	1382	1299	2096	918	1851	1217	344	354	394	1217	1351	1227	1222	1791	1341	1309	2008	1930	1374	2547	1918	1382	2113	1678	1181	895	1589	1091	844	1183	974	1208	1079	962	1075	1072
852325.SCO1	130	134	201	205	225	235	270	360	339	410	58	324	121	117	135	151	231	685	358	80	91	103	145	107	137	130	145	114	151	156	229	132	233	178	113	186	168	101	136	96	197	145	224	235	244	248	241	242	257
852326.CHS2	531	487	683	611	384	347	586	688	568	630	193	629	295	374	381	536	374	842	536	68	51	55	407	506	372	453	665	507	621	949	944	300	536	340	519	851	611	424	325	524	686	540	692	336	478	379	482	537	485
852327.ATP3	1073	1102	1447	950	1042	963	1415	1671	1557	1813	365	1925	667	948	857	1202	985	1634	1156	70	101	92	775	1380	1060	474	684	604	1190	1410	1562	999	1647	1265	628	1177	850	505	765	703	1249	1023	1348	1312	1453	1443	774	791	734
852328.FIG1	1	2	9	11	17	14	22	1	2	0	1	7	0	6	0	4	0	5	5	6	8	5	2	1	0	1	0	0	3	1	0	2	2	2	4	0	0	1	1	0	1	2	2	4	14	2	3	2	7
852329.FAT1	472	431	563	378	259	279	411	480	747	740	570	760	677	443	403	611	298	601	393	75	67	82	276	497	321	399	521	427	333	399	536	318	592	383	373	503	449	312	293	317	377	301	353	373	439	344	559	615	544
852330.CST26	362	352	446	399	396	388	438	327	413	383	424	461	595	286	229	302	207	340	275	67	60	84	400	455	373	266	245	217	360	305	467	334	610	418	264	330	315	264	303	291	301	273	244	294	341	276	324	329	286
852331.QDR3	270	266	430	448	283	285	416	406	605	675	217	555	377	445	407	701	215	587	367	107	101	128	311	486	403	249	441	322	530	672	725	359	743	552	382	558	503	265	237	375	274	228	338	268	363	299	320	334	355
852332.TCM62	210	194	253	208	151	142	205	220	177	234	81	201	95	194	167	300	106	185	136	140	206	232	147	235	193	119	168	124	207	216	277	168	316	197	141	221	223	108	168	132	211	164	226	233	304	254	154	155	136
852334.GIP1	46	40	63	81	71	70	91	22	33	20	29	84	37	93	69	97	43	79	50	212	215	248	139	199	201	56	63	49	20	63	42	76	126	83	65	45	86	90	62	111	30	26	31	68	93	75	35	36	40
852335.ZTA1	117	97	133	103	43	52	83	207	259	252	127	221	169	113	100	175	42	80	62	31	27	29	67	95	63	72	114	85	39	107	60	52	102	71	66	63	84	47	95	60	83	55	92	178	192	230	149	134	178
852336.FMP23	27	23	23	74	13	26	18	90	129	90	153	117	153	22	18	21	39	36	26	102	92	143	13	27	20	32	48	24	19	8	25	18	18	22	41	17	48	37	23	13	43	33	16	41	32	43	62	69	82
852337.RPS11B	7813	7983	8478	8033	9487	10892	10553	8216	8648	8651	9493	8303	10929	5017	4963	6134	7766	6543	7528	2141	2342	2668	8429	9780	7996	6128	7108	5874	3643	8025	4399	7804	12020	8453	6919	6722	7596	7438	6103	8177	8316	8854	7579	6816	6940	6371	9333	9955	9336
852338.REB1	488	495	756	528	277	274	470	522	459	498	148	399	232	339	335	523	269	518	381	196	175	216	304	603	409	503	719	550	533	631	777	231	354	319	366	646	595	336	338	445	557	471	638	489	707	553	350	375	342
852340.REG2	6	7	8	11	6	7	6	2	1	2	0	3	0	9	10	5	2	6	5	9	12	9	1	5	6	2	9	1	8	9	13	5	2	5	4	3	3	7	5	11	11	6	8	5	5	3	12	10	13
852341.RFS1	305	337	391	385	342	299	355	371	545	589	240	374	339	376	393	541	60	122	72	11	19	27	625	492	550	272	370	301	530	457	699	461	722	462	301	330	333	197	355	251	385	360	389	571	431	554	260	294	249
852342.None	118	114	159	256	163	156	186	287	380	494	143	548	241	125	128	186	136	205	161	177	178	208	202	178	188	188	235	176	247	297	399	221	320	242	230	343	324	103	137	140	146	113	168	199	166	266	354	328	354
852343.YRO2	32	32	51	175	49	33	41	16	174	201	5	65	37	80	79	123	9	9	14	2	2	4	16	43	19	16	14	16	19	22	30	255	393	307	23	31	34	15	44	18	47	38	47	70	23	47	16	10	20
852344.PRP6	377	356	457	335	280	261	368	298	283	314	112	220	216	207	195	296	152	273	223	133	111	129	217	364	292	262	398	335	365	344	416	184	313	241	234	320	300	325	250	373	285	247	352	276	359	290	260	241	222
852346.None	263	217	291	390	248	263	330	292	628	595	198	1027	267	671	619	799	256	517	342	199	205	207	465	639	481	379	513	439	576	493	709	505	736	518	416	568	480	180	233	218	250	186	213	335	198	309	569	565	574
1466443.None	1307	1581	1686	2274	1063	1363	1558	336	772	863	590	315	609	4404	4601	6610	210	179	262	50	70	62	4564	4677	4498	4719	5443	4279	5633	3584	7521	3416	6143	4281	2388	3906	3084	1546	1977	1920	671	645	770	2316	1469	2613	198	186	195
852348.MUM2	227	257	321	269	266	288	361	163	176	177	61	249	112	193	182	242	205	367	268	37	31	36	208	397	291	219	256	239	257	243	356	184	266	206	210	285	248	201	208	252	299	245	277	237	348	289	219	210	249
852349.UBP14	407	352	520	366	230	208	386	448	478	579	120	386	229	381	324	447	246	452	406	162	196	223	145	303	197	298	477	364	264	458	393	227	380	286	367	567	432	362	273	389	470	368	461	318	472	349	335	385	364
852350.TSC3	623	669	559	697	835	855	813	324	415	371	341	423	364	696	572	670	305	494	337	95	125	111	1273	1095	968	566	559	504	956	692	1267	1200	1338	1046	680	622	631	712	636	714	593	502	510	728	590	571	365	389	396
852351.AKL1	390	368	559	478	181	133	297	601	689	749	112	698	237	532	500	872	313	599	431	56	57	94	199	497	291	499	767	564	373	617	636	216	447	326	421	648	609	233	216	391	404	244	441	346	316	368	578	538	511
852352.ORC2	202	239	279	289	230	213	322	240	219	224	99	169	160	148	138	166	133	234	205	139	143	151	122	298	208	256	333	316	238	305	294	98	231	153	253	265	305	229	217	331	298	239	290	258	351	322	135	152	134
852353.TRM7	463	469	526	414	391	388	450	524	417	370	185	360	285	270	204	298	550	978	665	169	176	155	226	296	275	302	381	316	297	418	355	187	285	206	354	363	396	428	331	542	454	406	457	301	555	376	372	378	410
852354.None	202	209	263	260	233	245	268	193	224	216	88	184	117	157	159	209	121	258	123	92	127	133	202	262	211	125	163	119	216	192	314	154	259	178	150	160	175	114	142	120	204	167	168	215	205	214	204	220	225
852356.None	119	92	139	108	65	52	85	21	32	34	13	9	26	128	107	157	38	18	29	52	47	48	79	226	150	111	143	123	283	223	385	111	236	167	96	146	96	106	90	140	164	128	153	75	120	67	23	37	31
852357.ECM2	117	106	136	96	82	59	97	145	100	109	38	73	63	98	92	121	121	209	118	16	15	16	59	180	107	70	131	69	136	152	232	108	193	148	80	157	108	98	83	127	127	109	135	81	118	83	76	85	72
852358.NRG2	88	99	88	118	81	91	77	126	98	103	94	80	77	51	42	66	20	18	23	11	12	13	99	114	85	151	131	144	91	50	138	71	91	76	134	131	119	199	117	159	173	154	152	65	101	51	70	96	75
852359.TIP1	116	114	143	156	108	129	146	119	55	84	6	46	21	51	58	122	58	76	62	8	7	7	103	95	99	96	124	102	76	120	91	276	424	366	73	90	99	97	128	180	216	140	167	197	195	194	255	221	226
852360.BAP2	1976	1860	2852	1583	776	689	1159	1147	1692	1727	298	1070	630	1028	849	1416	970	2675	1686	789	829	887	828	1251	931	2201	3715	2840	1914	2221	3054	1140	2262	1577	1221	1505	1681	1180	626	1716	1046	746	1045	304	387	371	1174	1250	1261
852361.TAT1	917	886	1330	315	280	254	367	814	729	648	148	614	305	70	64	105	761	1815	1222	279	264	284	253	393	301	249	379	293	549	1042	870	140	283	187	135	127	197	245	107	345	252	215	304	24	37	43	716	721	706
852362.ALG14	203	203	234	273	298	319	343	312	367	407	497	321	522	218	192	258	95	210	107	121	114	113	527	465	384	151	197	101	424	277	460	349	525	320	217	287	196	181	265	270	229	179	185	288	260	271	190	190	160
852363.None	494	588	700	430	287	279	388	367	237	231	83	225	106	563	541	668	287	246	268	41	41	40	388	311	284	608	646	527	482	669	513	545	735	521	500	986	575	537	393	641	595	439	561	331	268	332	381	411	422
852364.HSP26	22	30	27	81	68	89	53	39	68	30	18	30	13	24	20	23	5	4	9	91	85	108	65	48	37	20	21	15	38	16	46	70	85	53	16	12	14	16	33	23	95	66	63	59	16	40	46	31	45
1466444.None	0	0	0	0	0	2	1	0	0	0	0	0	0	0	0	0	0	0	0	0	0	0	2	1	0	1	1	0	0	0	0	0	0	0	0	0	0	0	0	0	0	0	0	0	0	0	0	0	0
852365.RDH54	87	79	118	184	276	238	355	113	90	93	34	128	53	70	86	104	81	129	117	121	108	114	382	703	550	107	108	76	101	108	143	42	64	54	69	143	98	107	62	128	80	83	97	63	85	88	107	110	106
852366.PFF1	533	506	687	611	439	427	565	555	620	658	315	486	472	422	479	700	346	694	520	297	325	301	356	710	533	430	649	504	675	592	1008	420	762	566	515	744	688	487	415	612	513	397	619	491	627	531	412	449	427
852368.ECM8	55	71	87	120	60	60	65	25	49	31	25	16	24	79	88	122	0	3	3	85	73	88	74	59	59	57	61	51	180	75	217	142	217	157	42	70	49	33	29	35	61	52	56	31	25	32	5	19	12
852369.SLM4	325	313	289	331	246	246	218	345	423	412	374	330	459	333	342	343	172	133	180	107	86	126	365	353	281	284	310	221	275	266	334	237	314	203	307	305	276	250	311	289	308	329	293	317	252	290	212	179	197
852370.ECM33	7365	6307	8830	6925	5831	5993	7593	6804	7473	8292	3844	6984	5384	4116	4321	6147	5149	6839	6327	378	408	401	4535	6443	5126	5567	8362	6008	5190	7533	7120	3952	7567	5074	5699	7210	7309	6226	5603	7616	7347	6406	7645	6627	8791	7336	4605	4861	4560
852371.RPG1	2576	2307	3564	2906	2077	1721	2823	2125	2032	2343	556	1756	913	2032	1975	3052	2584	3507	3483	235	239	276	946	2061	1505	2269	3533	2608	1448	3213	2233	1175	2282	1617	2387	3230	3237	2528	1878	3435	2923	2451	3330	2154	3630	2437	2023	2082	1981
852372.SEC18	659	575	770	639	356	347	503	635	651	747	134	694	311	669	683	863	475	844	682	458	536	524	297	531	415	586	806	650	469	683	717	362	668	439	595	871	632	419	394	604	627	565	714	452	535	520	626	617	608
852373.SPT7	273	287	403	251	174	145	245	177	197	179	23	176	52	207	218	303	104	231	185	216	239	239	86	216	143	328	449	339	194	289	280	124	223	142	245	316	280	212	151	258	259	240	309	229	261	245	160	162	191
852376.UBC4	2120	2124	2237	2030	1777	2020	2004	2207	2255	2217	1474	2256	1721	2026	2082	2471	1589	2166	1722	324	387	355	1473	2158	1613	2345	2734	2163	2172	1943	2414	1586	2254	1542	2299	2352	2243	1916	1984	1904	2557	2194	1996	2725	2642	2374	2112	2053	2078
852377.TEC1	121	112	146	200	417	408	445	60	58	59	14	48	33	71	61	96	30	49	46	22	24	27	297	558	404	98	135	95	79	108	125	79	84	61	57	66	61	53	52	38	77	62	75	83	92	69	85	77	81
852378.MIS1	1318	1271	1855	1491	1140	972	1697	1688	1694	1905	664	1368	1082	975	1039	1515	1405	3338	1955	15034	15990	17188	719	1253	981	1090	1648	1172	1151	1964	1852	868	1664	1197	1154	1517	1652	1094	1024	1555	1575	1253	1748	1311	2075	1488	2169	2167	2134
852379.RPL19A	8869	8922	10875	9881	9329	9528	11304	8273	10200	10331	11927	10118	12400	7137	6795	9321	7090	8017	7658	6072	6315	6842	7592	10495	8563	7606	9130	7582	4004	9246	4716	8244	13197	9519	8739	9356	10460	8006	7283	9593	9589	8296	8777	9377	10506	8226	8085	8312	7992
852380.AAC3	66	96	120	106	49	49	74	156	152	139	56	87	89	78	68	133	122	299	176	30	24	39	64	78	76	270	392	324	118	136	193	146	262	226	124	130	127	233	201	308	95	91	133	197	306	247	304	281	328
852381.None	920	1114	1189	1499	660	689	755	633	1503	1653	778	1930	900	2184	2350	2982	330	263	329	24	26	34	1361	1638	1210	1208	1299	1070	3182	1216	3604	2574	3561	2563	1199	2680	1440	766	789	1043	693	697	755	717	526	714	703	689	670
852382.IST2	786	704	986	734	607	585	840	990	1474	1417	811	1279	1168	587	583	929	561	1357	843	331	367	357	532	1082	741	664	1018	819	827	1115	1159	392	827	550	594	992	752	566	555	829	923	702	873	600	949	705	1070	1159	1132
852383.RFC5	419	434	536	410	507	505	564	346	402	380	294	329	340	343	292	395	249	267	314	1895	2085	2258	389	618	467	328	403	320	469	447	603	432	739	501	358	481	436	320	336	416	433	409	444	465	519	470	475	511	487
852385.POL30	813	865	832	902	1029	1150	1147	724	534	454	423	461	360	489	442	573	686	366	643	111	106	116	696	719	605	714	799	661	395	632	464	296	464	316	844	1142	867	768	716	762	729	740	616	899	939	690	686	692	620
852386.NHP6B	461	509	532	574	484	499	513	604	668	684	362	455	558	423	463	523	318	266	418	273	260	244	579	491	389	474	451	495	617	443	734	604	705	512	576	530	608	482	529	562	476	462	415	639	625	554	480	506	444
852387.None	5	11	24	29	13	27	19	8	7	6	2	4	2	7	15	20	13	34	14	3	1	4	29	27	31	15	30	10	55	18	58	27	33	36	18	26	22	10	11	15	9	14	18	16	11	14	8	2	5
852388.TIM12	275	309	352	329	476	450	422	314	323	320	213	344	217	183	147	200	336	474	254	442	444	440	410	261	363	133	167	171	234	266	268	246	316	258	236	149	201	241	230	287	283	297	253	262	356	299	360	363	315
852389.PHO3	859	893	1186	392	562	475	685	4392	3184	4137	684	1511	1309	550	522	646	988	1595	1229	163	141	155	201	186	138	301	444	323	580	812	834	33	87	38	295	686	379	651	745	824	763	629	839	828	2220	967	759	824	787
852390.PHO5	63	62	79	98	66	58	73	50	83	66	12	119	36	68	52	77	56	134	83	57	46	67	46	59	55	40	47	50	104	84	173	7	18	15	45	72	64	45	46	70	49	38	60	73	106	93	84	98	85
852391.PBY1	273	232	293	246	265	210	321	399	472	416	149	491	213	185	181	254	331	821	513	170	190	194	196	299	218	211	266	238	325	261	408	135	245	175	235	273	249	165	145	193	193	187	259	212	272	196	310	367	330
852392.RXT2	163	183	219	164	144	192	211	333	304	295	105	285	151	125	136	192	166	359	232	128	118	146	167	250	228	131	235	163	173	210	246	152	273	164	117	205	194	132	81	168	185	161	215	106	143	129	224	255	241
852393.None	444	486	494	600	447	528	456	695	1081	1133	2019	1048	1919	626	630	698	226	110	224	218	211	218	739	686	619	619	649	527	1061	629	1140	562	801	652	726	838	706	354	362	334	409	417	400	451	464	433	521	545	559
852394.VPS15	167	157	195	140	117	110	163	126	159	161	48	214	74	163	125	227	118	194	127	583	557	560	88	164	118	105	153	108	110	145	138	75	168	115	134	145	160	100	78	140	140	153	115	144	133	142	228	188	205
852395.MMS4	115	88	142	94	87	71	96	133	159	149	69	155	106	87	105	151	88	347	143	68	59	69	69	107	98	105	110	90	255	129	266	59	103	65	112	148	123	75	94	81	106	103	120	84	115	94	121	125	112
852397.FES1	609	672	918	656	455	479	738	396	326	324	176	346	228	332	338	511	273	688	436	192	161	251	377	657	514	589	918	687	762	549	1068	353	642	488	466	409	604	429	449	532	495	430	558	658	865	763	371	371	394
852398.EXO84	250	163	292	208	144	127	222	321	291	313	125	327	161	185	159	207	190	530	267	375	443	456	163	261	192	178	308	239	199	278	263	113	162	137	189	234	230	192	179	250	248	183	246	176	271	227	267	282	268
852399.SIF2	259	252	404	220	143	134	224	286	195	229	87	223	113	210	162	278	162	472	228	72	51	95	173	359	334	209	354	264	229	314	376	108	220	120	198	278	239	203	166	294	313	237	343	199	305	242	172	192	174
852401.YMC2	398	397	550	474	369	390	501	436	389	433	336	301	386	335	264	415	202	475	252	198	198	170	315	335	336	325	412	364	473	488	732	348	588	481	334	400	527	403	376	539	474	347	483	436	770	459	366	351	370
852402.VID24	507	538	660	203	283	292	360	248	272	256	43	422	87	155	141	162	430	673	526	185	188	214	83	107	86	170	199	149	93	301	100	149	247	195	58	141	98	231	202	255	322	273	325	203	444	182	440	512	486
852403.PHO88	4170	4478	6389	6061	5914	6294	8189	2723	5362	4187	5724	5800	5907	3164	2992	4968	3299	5968	3601	4209	4532	4712	6028	5496	5682	3334	4849	4062	4806	5248	7030	5294	9713	7352	3894	4437	5439	3671	3661	5519	3354	2944	3870	4289	6294	5327	7112	7203	6802
852404.IML3	147	186	243	206	145	125	177	238	291	357	165	231	235	164	193	228	67	212	90	62	53	74	175	233	275	108	197	152	190	208	295	110	328	188	159	216	237	104	120	150	173	132	233	153	222	196	139	160	136
852405.AIM3	146	137	207	154	77	55	144	286	289	358	59	283	85	218	194	367	131	475	198	574	572	647	120	140	140	112	214	169	179	248	235	112	240	172	163	272	234	80	113	91	167	137	185	161	155	199	364	408	368
852406.CMD1	1744	1833	1768	1704	1801	1763	1766	1725	2056	2136	1524	1835	1863	1504	1706	1796	1237	905	1253	1126	1183	1237	1851	1762	1523	1455	1329	1233	2068	1750	2183	1449	1928	1342	1538	1541	1575	1527	1474	1601	1782	1633	1560	1738	1682	1584	1582	1498	1463
852407.ALG1	328	316	445	379	315	316	487	230	301	385	397	349	430	332	269	428	151	189	193	33	26	52	301	383	303	230	328	266	347	408	483	278	474	317	328	389	382	329	226	367	361	363	349	311	312	310	213	238	218
852408.YSA1	457	520	474	542	631	652	690	558	797	765	345	734	441	536	523	666	367	862	454	146	139	156	709	709	599	342	295	251	624	668	663	761	951	736	403	537	434	277	378	356	449	428	379	522	504	512	569	665	538
1466445.SUS1	273	268	229	218	205	259	205	256	297	352	341	325	351	195	171	226	243	176	234	76	75	111	211	274	169	170	143	134	216	130	205	174	239	167	229	149	173	206	219	163	212	207	155	216	218	180	307	339	319
852410.CYC8	692	558	940	664	470	324	607	711	538	530	33	462	152	450	419	643	615	1119	881	230	224	261	164	504	396	569	938	659	309	662	527	212	536	370	576	840	756	523	458	690	924	699	1043	610	922	691	754	747	810
852411.RAD16	280	259	393	251	111	106	220	446	652	638	185	502	303	333	307	508	275	519	382	151	186	193	132	263	201	251	398	266	214	328	297	172	298	222	249	305	333	300	282	355	394	308	417	378	373	433	389	430	411
852412.LYS2	469	439	766	573	281	241	453	226	317	297	57	164	112	526	438	811	80	133	102	30	34	36	257	399	324	504	806	692	472	668	728	264	517	410	489	707	727	400	523	595	673	540	799	793	1356	1012	249	248	211
852414.TKL2	56	29	69	54	43	44	77	58	42	62	16	23	27	21	16	31	5	26	8	29	13	13	23	40	34	26	40	28	41	80	62	17	58	41	36	34	42	46	42	92	59	38	75	29	66	51	12	23	10
852415.TEF2	21969	22233	30087	23365	13543	13024	19391	40969	43358	47926	19128	50986	31387	8373	8701	12469	29321	81879	44916	8707	8365	9570	3642	4518	3834	13316	16261	14323	21625	39133	32743	11782	24171	17023	15373	20484	18931	17233	18953	24118	17980	15802	17201	13974	18413	15763	20722	21630	20764
852416.MUD1	122	129	156	141	137	149	200	209	221	252	115	200	146	117	114	134	208	217	285	167	193	193	101	234	160	126	143	138	132	173	137	116	237	139	108	148	118	109	95	112	178	135	137	132	173	143	288	304	310
852417.CBP6	181	214	196	156	229	246	271	430	517	528	214	348	303	145	136	126	310	385	334	57	60	57	133	177	140	79	94	64	72	66	107	183	277	211	67	90	97	83	161	90	144	180	192	204	256	255	164	184	195
852418.GRS1	2409	2468	3159	2629	1766	1758	2569	2825	2576	2748	961	2398	1400	2074	2106	2973	2716	3398	3264	351	340	426	1537	2106	1640	2418	3146	2296	2048	3084	2436	1392	2289	1581	2388	3522	2914	2301	2193	2725	2868	2557	2945	2666	4080	2892	1940	2006	2034
852419.MRPL36	574	652	792	585	807	832	978	710	817	813	229	836	372	499	481	629	880	1388	1168	112	121	106	588	723	672	253	297	267	662	724	892	685	1113	889	336	450	425	415	335	545	644	510	629	411	438	417	477	462	491
852421.TFC1	192	163	265	186	149	126	225	436	431	433	182	264	212	142	144	194	171	398	218	51	48	41	88	226	172	170	247	200	186	231	296	96	213	163	111	225	189	143	127	164	197	176	204	154	229	194	183	210	220
852422.PTC4	276	262	380	379	283	274	325	384	497	443	169	592	268	242	258	309	365	894	560	1630	1706	1885	220	288	228	274	423	352	265	321	395	198	280	237	311	376	411	272	215	311	255	238	286	188	301	231	649	674	632
852423.TPS1	480	485	692	547	301	349	558	1816	2710	2836	144	4480	614	961	947	1596	609	2005	905	85	116	101	299	514	423	336	552	428	690	998	1266	464	1260	949	448	671	617	224	338	353	785	741	1048	476	379	593	2702	2706	2588
13393614.MEO1	1110	1167	949	899	1433	1655	1221	1019	1526	1667	1498	1037	1205	1311	1057	1225	381	307	304	1365	1423	1583	2322	1405	1379	555	508	450	2238	1120	2398	1786	2036	1379	1020	625	818	739	696	649	1145	879	771	838	474	639	1479	1455	1339
852424.VMA2	2722	2626	3169	2700	1926	1591	2428	2678	3146	3624	1296	3007	1921	2947	2934	3673	2078	2748	2716	822	791	870	1896	1918	1689	3027	3770	2853	2892	3846	3555	1681	2762	1948	2884	3840	3332	2715	2349	3144	3545	2831	3259	2972	3639	3107	3187	3427	3239
852425.ATG14	31	36	48	44	32	40	49	51	73	65	28	55	36	39	33	52	24	69	45	69	110	92	34	55	45	27	16	27	59	34	97	35	64	52	35	37	30	30	33	10	30	28	19	28	28	35	48	72	60
852426.OPY1	227	256	307	234	336	306	364	271	359	362	205	319	310	192	189	260	231	341	281	168	203	214	416	521	394	255	281	244	428	231	514	286	398	326	196	213	200	218	185	265	203	183	229	264	221	200	372	392	380
852427.SHE3	420	393	512	448	308	330	441	354	339	332	206	287	285	272	261	363	291	241	260	107	90	95	235	466	333	359	514	460	273	388	461	210	342	290	348	388	434	316	245	446	431	366	443	303	486	368	269	252	245
852428.CCZ1	91	95	141	98	58	57	86	141	107	87	28	125	47	82	82	111	112	236	139	24	25	20	55	86	91	98	125	121	114	102	132	56	93	63	88	136	108	75	56	80	96	78	110	63	79	75	124	127	121
852429.AGP2	32	30	35	15	7	16	28	117	145	136	14	218	42	27	20	67	60	118	56	129	136	125	14	18	20	22	44	21	41	29	80	13	33	30	28	19	24	6	4	9	39	25	48	17	17	14	129	123	126
852431.HSL7	352	335	590	356	236	230	394	369	388	468	103	323	187	257	225	393	194	467	288	173	191	271	192	349	248	255	503	403	247	442	373	164	371	281	267	441	417	236	155	342	414	357	521	158	337	265	249	247	226
852432.CKS1	214	254	315	234	157	201	256	342	225	271	117	190	178	184	199	262	163	470	202	4	6	16	171	214	214	226	302	224	187	247	274	124	208	180	192	315	233	162	220	241	319	289	287	229	393	240	188	191	188
852433.MEC1	109	98	134	110	64	35	70	90	96	103	36	90	44	73	89	124	71	92	81	77	112	88	55	100	64	94	141	74	87	96	116	53	73	52	77	88	98	75	66	87	76	85	92	111	78	84	99	89	93
852434.None	299	237	283	293	315	289	301	543	667	686	400	427	575	314	274	302	184	136	159	57	69	81	330	269	284	177	189	137	200	188	269	307	403	306	224	207	234	210	211	238	213	197	194	280	292	251	304	275	302
852435.None	65	85	68	65	42	48	53	84	50	53	21	82	22	65	51	65	46	69	63	9	19	7	58	88	91	62	76	74	90	85	113	59	75	54	61	112	67	54	42	63	113	101	84	40	42	46	79	87	78
852436.None	170	146	246	183	116	101	171	237	355	367	117	353	188	281	293	450	114	153	136	81	78	95	146	234	175	130	212	176	243	286	318	225	361	258	143	323	229	80	125	96	148	179	213	211	156	263	273	330	305
852437.IRA1	392	341	545	315	205	151	308	438	470	507	30	414	114	424	422	621	261	436	379	361	320	373	143	267	165	367	507	391	295	381	405	167	263	229	313	384	407	273	278	402	341	258	361	322	374	384	382	350	320
852438.BMT2	193	189	297	228	178	202	268	293	175	201	104	133	154	110	94	143	168	371	238	202	212	244	194	240	196	116	143	118	169	214	201	141	255	161	151	155	190	192	124	214	179	161	252	118	201	146	141	152	155
852439.MAK5	855	777	1054	748	668	587	856	770	620	583	177	504	210	417	397	579	997	1738	1302	396	439	443	304	725	493	647	845	635	420	812	625	297	520	392	676	789	820	881	697	1069	993	736	986	669	1161	720	591	609	586
852440.SUP45	2424	2438	2933	2608	2278	2245	3024	2013	1883	1917	1055	1904	1413	1914	2034	2476	2262	3010	2555	616	553	616	1872	2601	2018	2440	3077	2426	2381	2876	3156	1542	2404	1816	2467	3457	2885	2643	2269	3086	2706	2514	2836	2626	3618	2672	1675	1705	1748
852441.None	8	5	4	1	5	0	6	0	0	0	0	0	0	3	1	10	0	0	0	0	0	0	3	7	3	2	7	1	18	1	16	5	1	2	5	2	3	3	2	2	3	3	4	7	8	5	0	0	0
852442.ADH5	153	131	226	279	174	206	292	266	514	574	313	294	448	134	130	222	90	208	138	93	105	143	90	123	132	196	411	299	111	180	175	338	701	539	203	245	264	371	409	493	150	122	164	662	712	796	422	459	431
852443.MRPS9	617	615	785	665	908	784	1066	739	680	750	154	801	264	469	447	636	717	1180	882	277	294	243	628	958	734	329	394	364	488	625	829	689	1202	961	385	530	511	377	516	519	691	638	798	730	903	938	457	490	446
852444.RTC2	5	2	5	5	6	2	3	108	177	208	147	176	168	13	4	16	30	37	25	26	25	44	2	3	2	5	5	6	5	1	11	8	24	15	12	1	8	5	15	6	15	15	19	7	20	12	124	122	104
852445.YSW1	57	37	44	38	47	22	35	24	34	42	11	45	23	96	91	106	54	72	74	38	52	60	59	93	73	15	24	14	34	19	29	35	39	25	22	42	37	20	20	18	23	14	22	36	49	45	39	48	31
852446.ARA1	473	431	683	1323	430	378	686	1017	1262	1379	349	1364	689	1958	1812	2716	328	603	468	31	42	50	314	610	415	981	1324	1183	1241	1301	1706	1158	2107	1561	1295	1748	1710	903	869	1238	1077	878	1098	1239	1004	1366	827	806	841
852447.TBS1	73	60	85	95	53	47	79	92	141	128	46	146	63	120	97	155	67	78	82	155	158	153	66	181	132	138	190	116	100	99	143	22	40	43	84	138	90	91	130	95	162	100	149	188	314	231	103	124	110
852448.APD1	718	739	1110	882	629	662	1015	1364	1559	1621	530	1605	971	725	648	1102	875	2377	1230	429	407	433	635	881	883	594	777	660	624	815	1030	469	884	677	640	789	973	483	619	638	511	429	600	889	879	1061	971	937	1085
852449.SPP381	83	72	81	64	43	46	67	58	67	58	19	32	29	31	33	67	47	93	54	4	5	8	23	54	48	39	59	44	56	68	65	28	69	42	35	55	45	37	26	56	58	59	65	25	43	55	54	54	47
852450.RIB7	279	221	316	209	219	192	267	147	186	210	77	207	134	227	198	263	176	222	223	83	91	116	241	370	306	198	266	173	244	260	333	177	307	210	151	251	237	207	183	230	192	178	197	218	216	208	144	162	188
852451.RPB5	1168	1212	1505	1268	1158	1223	1445	1175	1087	993	816	1013	814	802	738	968	1258	1683	1319	190	206	214	992	1515	1170	1041	1350	1078	1036	1237	1337	783	1224	923	1165	1407	1282	1412	1182	1625	1281	1231	1323	1284	1958	1308	888	900	916
852452.CNS1	603	619	690	516	463	578	545	865	824	873	517	728	587	319	302	344	674	935	817	100	121	132	241	595	372	405	563	368	321	526	405	215	381	233	432	509	503	509	391	656	524	494	561	395	672	398	425	531	514
852453.SLI15	102	103	155	76	62	69	104	106	72	68	35	85	35	48	52	83	71	151	108	101	127	151	32	105	60	72	112	94	69	75	99	44	62	59	51	94	67	59	48	98	126	108	132	59	88	75	81	74	82
852454.ICS2	11	5	6	33	14	20	25	11	22	23	3	18	12	6	5	6	7	14	16	4	6	8	27	50	23	1	4	5	23	17	37	10	12	9	12	10	15	2	5	5	3	7	5	7	12	6	5	3	7
852455.AMN1	510	489	576	456	562	576	731	445	363	417	106	285	168	240	301	348	349	358	372	145	120	140	358	583	411	244	261	250	227	443	322	179	254	183	252	377	339	314	330	388	505	414	444	399	403	389	258	266	231
852456.IFA38	757	637	880	899	807	852	1056	852	1285	1309	1384	1409	1767	681	708	936	658	1001	681	276	268	294	945	1022	960	554	662	560	1038	950	1408	1088	1792	1405	715	1209	932	511	684	581	631	576	660	879	1259	994	957	1065	1057
852457.CDC28	363	386	544	359	220	269	338	374	307	306	139	382	173	226	238	353	262	725	392	56	62	57	233	274	245	258	320	273	199	354	240	201	270	248	282	312	326	309	270	404	419	378	467	279	369	375	425	430	502
852458.CSH1	127	113	205	101	79	91	95	260	324	269	230	415	327	104	88	129	108	348	185	95	106	107	178	263	213	68	126	63	241	172	323	133	202	150	73	146	132	82	76	121	141	136	139	91	132	95	309	360	343
852459.TOS1	2531	2298	2990	3549	3210	2922	3895	2057	2371	2484	667	2047	1287	2894	2872	3796	1576	2746	2011	189	221	184	2136	2839	2420	3504	5253	3839	1793	4039	2504	1140	2132	1422	3098	4161	3859	2968	2712	3698	2799	2354	2910	3175	4531	3662	1522	1597	1501
852460.YSY6	1508	1799	1199	1010	1600	2283	1345	803	1732	1463	2455	1170	1467	1535	1085	1139	844	686	585	435	496	516	2240	2173	1819	830	806	729	1894	1313	1662	1617	1916	1219	1191	815	942	1095	955	905	1301	872	831	1318	1222	1026	1284	1186	1225
852461.EXO5	194	178	222	215	184	153	214	155	196	208	60	125	130	128	122	201	57	160	103	21	27	35	128	308	217	202	263	197	350	228	446	108	232	153	170	245	258	138	118	168	175	175	218	165	200	156	51	73	60
852462.ARL1	587	637	724	634	766	727	809	576	719	672	562	633	627	520	570	690	413	590	493	241	250	260	775	926	681	537	689	502	710	587	828	590	841	612	567	707	658	727	583	735	640	503	502	650	743	588	463	443	433
852463.UBS1	224	227	279	218	143	165	211	238	211	215	132	122	180	177	178	260	85	197	107	50	44	56	194	322	277	178	247	178	349	229	450	226	357	227	198	259	252	175	115	246	249	193	224	126	185	137	119	106	88
852464.TYR1	351	397	453	389	275	269	355	545	499	535	220	501	269	285	317	387	545	654	581	343	347	404	238	342	296	334	410	322	437	478	490	186	340	246	297	454	370	257	296	360	344	310	374	408	541	416	576	601	632
852465.POP7	182	194	171	147	190	187	171	170	216	162	127	170	204	137	142	172	137	222	140	41	34	45	183	217	184	114	140	118	195	163	255	155	325	167	144	151	155	185	131	197	165	140	140	120	131	104	173	159	151
852466.PEX32	131	131	170	115	136	98	121	93	128	133	95	162	123	133	83	102	40	114	77	62	45	60	107	203	184	77	107	98	179	133	221	72	119	115	90	119	131	92	82	96	78	87	104	73	79	64	105	135	87
852467.SSE2	137	139	165	105	73	94	97	241	317	267	63	259	160	101	112	168	81	117	76	33	46	28	46	100	61	101	101	88	100	84	144	119	148	115	76	95	125	56	71	79	116	68	104	106	93	110	170	187	158
852468.NPL4	309	298	384	238	188	171	206	262	297	332	78	338	155	263	250	353	117	219	182	710	806	893	170	276	221	223	302	212	359	269	444	135	285	192	190	304	241	184	196	198	285	237	310	286	247	271	347	343	337
852469.SEC66	770	689	795	750	776	923	868	717	1015	876	1207	936	1229	630	545	637	417	498	404	383	425	482	720	943	752	514	605	474	740	598	883	729	1096	789	675	814	635	717	606	824	644	589	530	580	766	577	927	1019	985
852470.SMY2	940	816	1155	707	560	527	675	937	704	765	189	609	312	658	598	837	814	1130	1062	1430	1622	1720	293	637	389	685	999	700	549	819	682	465	728	516	618	879	801	774	710	918	955	804	1058	909	1123	861	813	812	879
852471.UMP1	598	638	661	488	427	478	438	725	1048	919	628	1056	712	611	633	698	600	928	596	645	722	813	493	367	334	609	616	543	612	526	651	388	500	340	591	607	589	602	585	577	609	566	483	714	664	589	831	902	806
852472.SWD3	181	141	273	181	150	129	201	203	285	271	112	286	166	161	140	199	121	477	202	302	359	402	241	206	202	139	176	141	402	237	581	147	236	207	160	169	167	97	131	145	180	141	190	166	195	160	219	220	232
852474.ECM31	154	176	224	174	94	104	90	194	244	182	142	275	192	147	143	164	150	222	181	65	47	68	73	147	120	126	165	142	158	183	228	117	154	114	155	194	161	142	128	121	157	149	136	136	154	138	173	173	188
852476.EHT1	374	355	549	371	252	222	426	341	1361	1409	208	1446	454	1026	952	1550	396	693	486	61	34	60	280	399	322	159	262	152	1068	937	1474	927	1819	1330	289	1216	382	165	327	214	418	353	488	586	672	650	271	362	311
852477.FZO1	220	233	309	216	194	174	291	314	290	266	48	387	105	220	203	305	281	562	412	117	127	119	114	259	207	223	218	220	240	211	328	98	230	175	182	330	252	137	143	211	287	220	301	214	287	245	221	275	220
852478.DTR1	50	45	69	34	18	14	23	8	20	13	9	15	9	27	24	32	8	7	7	15	10	17	14	17	15	31	51	38	18	22	27	25	27	32	33	32	26	12	31	26	12	10	12	22	48	43	17	19	24
852479.RPS6B	6855	7132	7821	6012	9218	8906	10363	10751	11985	12079	11291	9033	12732	7369	6987	9074	3633	2797	3544	569	604	663	6772	6306	5701	7341	8530	7207	4292	8789	5211	7284	10481	7882	7005	7837	7449	6816	5740	7780	6829	6580	6314	14088	18372	14495	1702	1742	1556
852480.SMP1	104	101	134	106	31	31	49	29	36	37	5	31	14	65	82	137	35	166	93	31	44	48	31	27	33	162	255	193	20	33	39	46	62	56	60	90	80	55	117	71	84	56	85	220	121	262	44	42	47
1466446.None	8	5	5	10	4	2	4	0	0	0	0	0	0	8	3	10	0	0	0	1	3	1	1	5	6	3	5	4	7	1	9	2	3	1	1	5	11	0	4	1	7	9	11	11	10	11	2	0	1
852481.YPC1	69	74	88	110	116	146	146	41	154	129	24	86	39	228	258	304	21	34	23	20	17	20	116	116	100	17	16	19	122	55	156	346	558	394	38	47	35	22	111	16	98	107	113	186	92	202	97	110	133
852482.None	40	36	34	34	18	25	17	4	4	1	1	2	2	4	6	6	2	1	9	0	0	0	10	28	12	16	18	7	32	15	38	42	56	36	7	8	9	11	14	10	24	6	14	11	21	12	1	2	1
852483.MBA1	178	227	224	142	194	209	226	355	327	361	123	466	181	123	121	181	435	390	468	997	1057	1115	147	178	123	72	99	73	120	125	151	153	209	155	100	102	111	112	143	121	216	174	162	231	236	188	284	252	282
852484.PCH2	97	79	69	54	71	88	72	165	258	299	202	271	227	31	38	53	182	164	161	110	130	148	16	31	30	55	70	53	83	58	74	22	61	41	84	53	76	59	48	68	68	64	61	80	77	72	120	155	142
852485.GDT1	1575	1494	1973	1518	1576	1645	2177	1930	2935	2818	3762	2806	4238	1012	873	1368	1688	2133	2047	1353	1317	1554	1821	1471	1475	1063	1246	1074	1139	1576	1474	1213	2103	1506	1151	1365	1392	1274	1241	1608	1472	1258	1426	1529	1912	1553	243	252	231
852486.NTC20	124	144	121	95	101	107	84	29	38	44	56	20	55	122	112	111	7	2	8	5	6	4	116	159	110	78	72	77	74	107	96	103	126	115	121	153	115	80	83	115	126	104	76	102	113	96	0	1	0
852487.RPS9B	13566	14245	17310	16497	15654	16642	19584	14215	16075	16392	16849	14452	18819	11920	11229	14895	10780	6502	11024	8511	8797	9962	13922	15592	13730	15097	17461	14704	8050	16260	9233	15553	24218	17215	14028	16489	17155	14528	12807	16643	14665	13166	14981	15064	17706	14122	13032	13347	13078
852489.RPL21A	10080	10671	10356	10425	14052	14906	13568	9714	12591	12155	15686	11069	15962	7766	7683	8505	8399	4656	7195	4200	3862	4534	12032	11267	9507	8897	8543	7489	7207	9495	7075	13028	16469	12003	9556	10184	9770	9971	9533	10025	10600	10245	8653	11284	12230	9408	8720	9435	9041
852491.RIM2	445	435	485	388	473	382	500	724	681	719	237	724	335	274	264	376	687	1191	938	303	376	357	325	368	303	222	258	200	341	392	401	303	446	358	294	412	310	291	358	353	438	374	446	448	560	487	548	520	534
852492.MED8	198	202	233	182	173	142	210	202	199	185	91	268	101	142	145	219	179	433	236	131	144	116	156	220	184	139	173	124	168	214	216	120	218	169	128	246	199	135	145	170	187	149	152	166	190	165	158	178	164
852493.AIM4	86	120	93	67	83	87	79	77	66	63	39	28	37	52	66	87	65	68	53	22	29	20	120	124	103	63	28	55	58	72	53	56	84	52	53	54	58	86	75	87	99	98	75	73	87	49	49	38	50
852494.MSI1	233	183	285	223	134	135	173	376	270	279	53	212	122	120	127	162	268	620	341	354	385	416	121	190	133	149	261	189	152	250	204	91	181	112	178	199	191	139	133	191	157	124	184	172	223	172	261	272	260
852495.PGI1	5201	5148	6428	5864	4232	3619	4883	5827	5729	5937	1943	4774	2601	5849	6040	7496	5452	8568	7009	751	756	881	3435	3279	2866	6177	7475	5967	3145	5521	3752	3250	4799	3548	6016	7129	7097	4893	4951	5786	4981	4080	4615	6535	7236	6299	5928	6255	5991
1466447.None	23	10	27	20	12	14	17	7	18	17	17	8	11	30	25	39	7	50	22	107	125	102	19	22	22	29	54	27	15	13	15	12	20	11	20	20	23	18	22	19	24	18	16	28	29	34	38	36	36
1466448.None	32	22	42	39	36	42	43	0	0	0	0	0	0	32	39	42	0	0	0	0	0	0	32	29	30	35	41	47	61	27	54	32	34	16	22	25	24	20	28	26	32	21	29	32	44	52	0	0	0
852496.None	90	65	104	165	190	236	279	132	149	145	29	96	88	57	61	89	119	379	235	93	107	141	58	82	62	59	120	78	114	181	201	40	115	84	58	76	80	81	43	100	70	56	76	80	99	72	148	159	146
852497.TAF5	479	462	903	519	304	251	539	597	592	621	144	496	278	327	324	612	354	928	511	238	247	245	186	405	330	400	751	599	326	806	579	187	440	319	353	526	577	435	332	733	563	427	752	440	712	629	467	487	499
852498.KTR4	554	527	754	844	717	731	883	769	1130	1241	978	1117	1306	543	561	782	357	741	473	303	317	398	759	1141	945	516	703	626	982	810	1334	826	1491	1094	633	960	764	502	678	591	623	569	721	900	1093	975	735	733	735
852499.BEM1	283	237	339	278	341	323	373	550	501	549	220	374	369	225	190	260	285	438	314	263	252	309	226	528	381	246	342	279	380	338	483	189	343	236	208	303	261	235	237	276	266	241	301	257	376	258	314	297	311
1466449.None	0	1	0	4	1	1	1	0	0	0	0	0	0	0	0	0	0	0	0	0	0	0	0	1	0	0	2	0	0	1	0	0	0	1	0	0	0	2	0	1	0	0	0	0	2	0	0	0	0
852500.DER1	168	142	161	150	154	186	169	152	174	200	179	274	190	153	164	184	134	164	138	55	70	71	208	187	176	109	131	115	86	94	88	166	183	177	126	131	118	79	98	72	103	99	65	123	118	134	229	202	249
3799967.None	79	86	76	45	24	32	31	23	22	23	8	24	10	27	41	52	24	8	28	10	15	17	12	7	12	47	44	29	53	26	63	28	32	35	14	21	18	55	21	49	91	91	68	41	46	26	73	63	74
852501.MCM7	563	551	999	524	324	239	488	460	310	325	8	357	83	288	298	548	343	667	507	56	45	51	178	291	261	388	691	540	293	818	564	237	446	333	424	767	652	435	316	631	786	546	856	369	522	489	314	317	286
852502.COS111	187	160	281	332	187	162	215	150	220	162	155	263	189	466	500	619	87	165	128	152	161	163	398	544	392	371	502	362	1165	631	1553	956	1444	1124	270	454	389	270	181	383	262	221	279	121	196	119	204	234	215
852503.LDH1	138	132	174	188	176	219	225	67	134	100	50	205	77	159	157	233	68	91	82	25	36	33	122	312	220	105	145	97	185	153	241	132	193	151	116	176	137	48	121	89	132	104	137	202	254	272	161	170	168
852504.KTR3	521	470	624	590	619	595	757	489	753	676	600	697	768	458	384	605	463	658	605	244	270	316	536	635	573	431	559	492	529	631	613	480	782	572	540	611	646	483	477	523	478	367	479	536	707	582	488	522	520
852506.FTH1	375	353	462	528	282	268	381	511	787	794	374	1065	564	274	247	381	318	634	419	95	116	82	250	253	266	389	493	384	328	506	413	293	349	309	594	713	828	254	244	384	400	357	358	290	343	357	307	343	293
852507.DUR1%2C2	386	352	585	278	181	151	264	201	405	326	310	632	360	161	169	262	124	284	154	79	95	68	92	153	94	308	489	365	139	199	228	138	266	167	180	326	248	527	316	815	370	233	367	228	319	312	253	261	297
852508.None	55	55	46	63	53	52	54	33	34	59	28	37	27	38	43	64	23	17	24	9	9	10	83	66	57	51	59	54	159	53	148	64	95	70	40	71	54	24	26	33	57	44	57	45	41	25	10	24	25
852511.ERV15	217	203	290	277	270	281	377	195	241	223	293	222	275	167	147	239	165	127	159	48	59	78	240	370	287	155	210	183	233	215	300	131	210	155	165	241	263	165	169	227	239	195	223	170	211	181	200	183	174
852512.AME1	86	79	92	59	103	104	122	145	177	190	95	121	120	71	71	65	63	97	99	140	155	156	76	110	89	76	55	65	134	90	124	65	63	66	74	104	84	69	60	57	105	86	52	79	112	57	118	126	127
852513.NGR1	325	297	532	313	189	156	264	483	406	446	31	370	110	292	268	423	318	993	510	25	10	12	124	218	178	322	557	387	241	432	361	123	219	138	257	462	392	226	206	287	381	328	370	256	304	263	342	400	451
852514.MET8	94	60	116	113	77	48	96	202	341	290	144	229	222	86	80	122	89	200	116	123	111	121	73	56	72	49	86	75	108	132	116	53	85	69	65	106	80	60	46	74	112	88	143	76	111	85	145	130	149
852515.SDS24	116	102	153	178	79	72	91	214	324	346	44	489	102	366	259	495	45	98	36	123	149	160	75	121	107	180	304	224	55	230	136	111	218	168	169	248	200	86	86	149	157	141	202	161	109	166	435	403	405
852516.HPC2	250	263	343	217	196	145	209	167	159	146	45	131	58	200	197	229	153	251	221	132	152	173	110	227	178	207	280	239	202	217	242	96	225	142	210	301	233	171	148	239	245	246	283	212	245	192	179	189	165
852517.YBP1	227	229	292	229	192	170	260	255	263	277	82	212	162	198	164	269	156	234	200	134	128	191	150	293	186	192	252	196	266	262	358	161	308	183	156	277	209	162	167	220	196	184	233	193	268	223	184	237	212
852518.ATG12	117	128	151	102	147	125	153	107	188	171	125	201	202	128	94	131	64	97	116	71	75	73	132	200	134	119	99	74	206	132	251	155	200	146	85	138	93	80	81	113	101	82	95	84	108	103	119	121	118
852519.PYC2	1175	998	1651	1332	888	764	1286	2504	1943	2271	371	1718	795	973	957	1471	1806	4955	2901	668	654	761	683	1009	769	1980	2989	2199	949	1489	1458	550	1184	795	1138	1539	1536	1195	1003	1651	1649	1396	1953	1357	1930	1564	1792	1779	1814
852520.None	0	0	0	0	3	0	0	0	2	3	3	0	0	0	0	0	0	1	2	1	0	0	0	0	1	1	1	0	1	2	2	2	0	0	0	0	0	0	0	0	0	0	2	1	0	0	2	0	0
852521.None	361	336	652	498	221	234	488	316	340	351	139	250	242	296	295	569	157	583	249	31	31	46	195	316	311	266	547	375	290	552	544	208	552	428	267	512	516	265	223	500	309	291	442	247	505	337	167	132	158
852522.PDB1	1337	1198	1683	1317	935	912	1300	1540	1509	1687	616	1604	907	1452	1438	2072	1010	1990	1348	358	443	484	1058	1215	1051	1167	1496	1168	1394	1765	1898	822	1337	926	1400	2136	1679	899	1065	1148	1453	1271	1448	1462	2119	1618	1042	1107	1041
1466450.None	0	0	0	1	0	1	0	1	0	0	0	0	0	1	0	0	0	1	0	2	1	2	3	4	1	0	1	1	0	0	0	0	1	0	2	0	0	0	0	0	0	1	0	0	0	0	1	0	0
852523.PCS60	335	261	375	248	175	139	218	191	240	263	33	197	106	369	349	453	82	181	105	52	77	62	130	149	127	256	367	259	249	390	332	160	222	225	179	303	275	226	267	304	441	347	370	301	358	314	243	263	246
852525.TDP1	97	78	145	91	61	61	84	188	188	181	27	221	51	122	123	185	97	344	161	33	15	31	84	133	107	64	102	98	109	128	152	81	133	111	74	110	127	80	78	107	93	86	86	61	77	86	135	173	153
852526.None	122	118	125	99	82	68	105	204	148	225	68	136	92	122	98	179	85	145	136	23	30	38	55	99	74	102	132	100	98	120	119	51	104	77	86	119	101	76	57	97	123	122	107	85	69	85	69	115	109
852528.MCX1	262	242	303	224	167	155	221	221	253	203	88	236	124	228	222	294	104	291	182	31	49	32	134	214	156	208	290	225	177	306	244	150	248	147	187	351	316	159	150	231	226	186	245	179	317	222	158	192	170
852529.SLX1	144	142	163	113	95	114	142	110	93	131	43	89	69	132	117	140	76	101	95	95	116	108	101	175	118	104	127	97	173	140	231	122	207	147	95	124	105	88	97	113	118	65	99	99	127	96	69	87	64
852530.ROT2	384	294	476	306	208	214	310	276	236	249	85	196	122	364	320	425	130	232	200	39	22	43	268	502	338	268	409	332	427	390	556	202	372	229	278	393	366	283	216	344	424	256	410	241	314	300	204	226	190
852531.OM14	145	151	136	132	61	80	103	135	115	116	15	237	46	88	72	102	74	60	60	11	9	10	111	98	89	35	33	36	138	97	181	82	145	64	47	69	53	42	82	28	221	173	131	152	119	114	153	150	172
2777172.None	113	153	107	138	87	125	94	68	76	108	74	42	62	138	144	146	55	66	36	18	19	14	179	136	163	51	37	34	119	98	103	214	197	180	116	91	93	53	61	59	94	93	64	73	57	72	69	61	53
852532.SWC5	158	180	271	197	89	106	138	139	135	115	44	88	50	138	115	188	45	146	71	254	274	304	113	150	124	163	319	224	197	248	317	65	101	74	152	159	229	109	114	166	191	151	204	133	208	185	115	136	128
852533.PBP2	139	127	211	139	114	111	160	212	196	185	73	209	131	102	85	144	105	254	136	18	11	17	91	189	131	137	214	151	140	171	186	77	91	55	142	161	173	96	82	142	194	151	192	134	149	144	134	124	147
852535.DAD3	98	138	109	105	142	196	181	77	65	84	90	57	96	52	43	59	66	30	46	46	71	57	178	202	164	84	115	70	160	92	142	135	146	136	65	67	80	104	91	88	107	122	95	81	122	78	87	85	98
852536.ARC40	1118	1044	1466	1210	680	655	854	1399	1724	1846	1134	1765	1234	1239	1177	1752	887	1496	1027	2026	2310	2346	857	1077	892	1482	1989	1547	886	1324	1161	708	1207	838	1230	1802	1569	975	978	1130	1215	1010	1257	1205	1297	1418	1190	1291	1277
852537.VHC1	248	164	256	219	121	124	195	393	435	447	199	422	319	192	179	279	202	356	263	550	450	517	122	171	175	193	270	206	217	318	296	143	262	208	177	270	244	146	126	233	191	165	250	183	231	230	273	294	275
852538.ABD1	295	336	446	372	362	330	398	282	272	279	93	296	183	302	242	369	141	245	182	114	119	147	319	475	389	277	416	351	344	375	466	246	355	281	313	438	367	268	263	324	361	304	367	339	329	278	190	203	203
852539.PRP5	174	206	245	196	105	82	158	385	305	336	79	343	123	189	181	292	239	640	376	13	15	13	91	235	128	159	240	187	259	261	329	85	178	133	156	251	192	157	133	190	222	165	222	138	199	167	271	274	248
852540.None	718	656	1068	587	593	518	691	713	528	613	64	506	209	415	369	528	790	1085	1042	25	28	25	164	382	265	610	773	587	215	671	349	224	435	286	535	803	641	756	656	1052	763	681	805	843	1205	893	747	806	790
852541.ERT1	142	129	206	129	78	114	119	157	195	201	84	170	119	119	113	131	112	296	176	1099	1156	1253	78	128	97	119	168	130	127	221	170	82	137	110	136	191	150	100	97	151	237	177	217	112	158	108	238	249	228
852542.THI2	32	23	38	24	24	17	22	187	174	199	14	83	58	63	64	82	5	5	3	2	6	4	19	20	10	15	16	21	73	73	113	36	89	71	3	55	24	29	48	27	42	17	23	74	188	81	25	24	29
852543.None	72	59	109	90	31	23	51	74	120	125	9	111	47	100	96	159	10	55	23	11	19	9	49	67	59	44	70	53	108	98	181	77	142	86	75	84	78	38	45	60	59	67	80	62	62	61	37	46	50
852544.None	559	547	646	575	496	495	525	378	541	553	312	462	426	508	473	653	444	547	449	1233	1393	1428	455	477	403	359	483	436	558	462	572	431	672	477	426	547	477	565	410	634	846	786	863	438	558	456	628	674	621
852545.ALG7	357	279	419	323	276	237	381	371	491	494	358	601	504	258	240	349	299	853	450	417	450	531	320	383	351	283	393	302	339	449	494	185	421	285	276	440	362	237	252	276	329	228	312	280	399	277	394	405	387
852546.GPX2	1361	1497	1552	1561	924	1149	1781	141	164	124	258	157	252	793	735	928	855	362	757	551	546	527	2068	2295	1861	2575	2683	2284	546	420	585	371	523	350	1686	679	1703	720	798	640	449	395	412	1103	621	975	347	373	399
852547.ISW1	430	427	567	407	288	291	389	598	493	501	122	451	279	346	323	503	354	745	491	112	111	109	178	433	317	403	592	501	266	441	448	240	388	248	424	484	494	326	294	481	415	437	525	403	471	384	467	436	409
852548.RRT2	330	288	491	355	340	373	476	367	484	394	267	425	320	221	216	323	382	889	514	951	994	1059	249	461	384	223	397	318	318	407	460	243	498	369	275	264	340	300	265	396	376	307	382	311	414	372	475	529	503
852549.ENP1	856	871	1053	734	598	565	760	1037	739	784	308	599	410	366	383	535	1078	2063	1501	638	691	764	319	513	352	609	722	621	460	779	573	353	452	392	665	599	795	965	597	1119	1004	853	1015	658	1041	680	670	682	692
852550.HIS7	803	719	1215	979	553	513	915	490	400	396	182	386	259	697	823	1128	369	658	438	247	276	322	461	809	719	845	1497	1193	634	1267	918	378	892	590	821	1120	1136	906	638	1397	986	809	1303	672	1075	819	431	452	421
852551.ARO4	2484	2537	2728	2454	2542	2332	2808	2188	2347	2503	947	1489	1229	1705	1698	2081	1589	2400	1941	994	961	1172	1020	1039	832	3292	3784	3028	1655	2167	1802	1554	2317	1621	2243	2549	2565	2479	2335	2855	2729	2345	2507	2867	3639	2816	2105	2281	2261
852552.SPO23	18	35	23	7	15	27	14	20	22	18	3	9	11	10	13	17	15	16	6	8	6	2	14	34	5	20	28	9	43	33	58	5	7	5	12	15	7	9	4	7	8	13	13	6	11	15	10	7	12
852553.MRPS5	277	291	380	305	373	354	408	806	813	816	260	954	429	179	165	213	638	1768	1079	268	280	293	173	327	227	139	158	141	253	304	400	220	375	273	183	220	200	213	238	246	282	250	325	321	368	314	398	412	413
852554.DUT1	565	619	740	705	853	972	1075	405	547	438	512	454	645	405	321	463	446	744	438	907	840	961	927	623	642	350	426	367	571	605	728	683	966	757	438	459	502	518	480	617	452	424	463	560	646	550	574	636	565
852555.SRB6	158	229	183	249	215	289	231	130	201	148	235	259	186	202	168	236	190	226	167	56	61	52	264	284	297	151	170	133	239	240	242	195	281	220	184	239	198	162	164	178	180	192	175	168	181	154	246	241	211
852556.TRS20	169	218	202	199	328	369	352	147	192	188	151	183	170	132	140	154	95	106	99	114	132	156	265	254	246	157	201	194	200	217	307	192	288	212	167	138	181	202	152	223	175	170	175	160	224	153	95	121	125
852557.MTC4	176	145	208	146	89	95	122	102	119	108	38	158	62	198	161	273	96	312	151	406	378	449	94	198	134	144	227	182	179	215	236	93	171	119	146	233	212	114	120	185	146	112	170	108	142	117	142	134	128
852558.RCF3	117	153	161	136	99	137	141	112	208	148	89	151	121	135	121	191	86	55	70	98	100	92	102	134	82	73	74	65	155	149	191	68	152	118	99	106	157	82	93	96	129	120	119	106	114	93	62	78	70
852559.RIB5	556	543	612	856	707	697	727	327	452	435	433	366	534	631	548	705	112	278	122	42	40	49	847	885	651	644	706	612	1068	577	1334	920	1368	975	537	580	613	489	655	546	672	577	608	911	868	802	236	244	235
852560.POP4	195	210	179	185	180	180	188	138	105	104	76	113	109	98	86	112	178	119	163	176	181	191	106	152	113	144	134	138	159	148	166	114	128	101	157	149	114	159	99	128	195	173	185	158	215	127	138	158	151
852561.SHG1	96	85	86	65	91	116	75	116	156	132	112	87	138	62	59	68	68	83	75	152	180	193	73	129	77	45	53	25	63	52	80	56	90	66	53	53	58	43	45	46	81	69	62	60	53	57	104	104	112
852562.None	143	127	194	142	122	126	162	133	116	110	47	123	69	110	112	182	85	151	128	129	149	144	113	210	143	108	150	79	159	157	210	113	158	115	109	179	175	129	107	150	180	139	147	117	134	153	99	135	129
852563.RGD1	203	159	275	211	140	113	172	234	231	294	49	276	76	153	164	217	205	456	284	64	62	82	106	206	171	132	204	188	149	222	240	94	213	125	146	229	216	129	124	164	222	147	223	170	212	184	247	238	263
852564.TAE1	450	457	749	658	469	467	719	679	862	859	481	814	659	448	478	780	601	1884	836	467	532	588	444	651	651	463	812	634	455	909	725	391	860	607	488	645	753	538	410	825	563	458	753	385	618	522	628	703	689
852566.MIC12	478	539	433	410	694	711	631	550	809	683	485	666	495	349	339	346	724	614	656	126	119	137	618	473	426	197	213	179	499	399	464	628	787	544	280	240	257	316	409	362	397	446	291	526	504	437	532	618	567
852565.SHM1	859	955	1420	1253	791	741	1132	1280	1161	1260	214	1280	423	1034	979	1472	1081	3299	1817	268	254	269	622	624	617	967	1324	947	1046	1678	1388	690	1266	1047	1076	1499	1389	843	891	1136	1290	998	1320	1017	1576	1184	1012	1033	1001
852567.YPT10	147	161	238	171	158	206	214	188	171	156	94	138	114	114	84	123	87	225	134	88	88	118	162	190	184	116	130	105	74	131	101	64	137	93	122	150	137	120	94	151	126	118	153	113	168	118	125	147	130
852568.TSC10	597	523	726	525	393	329	498	880	845	834	201	847	390	396	365	579	580	2481	918	1339	1352	1494	236	227	247	475	742	560	391	707	568	221	452	308	405	682	619	487	332	632	514	428	594	400	560	436	681	732	631
852569.REI1	993	1021	1558	934	801	589	1156	915	705	580	148	626	264	410	374	622	1061	2778	1670	354	415	435	334	649	572	627	922	701	491	1118	734	307	654	464	628	834	977	1031	733	1504	1057	884	1208	807	1365	876	688	723	691
852571.MRPL37	442	466	521	392	435	590	500	580	699	679	306	634	448	259	263	324	547	1364	588	143	152	179	520	377	466	231	274	237	312	380	371	371	529	378	294	224	325	250	337	294	353	314	312	437	522	452	363	367	323
852572.SDH8	183	237	355	383	227	197	351	177	294	235	208	415	283	281	230	418	73	209	77	26	37	35	309	333	336	171	254	194	298	414	368	203	483	349	221	293	324	155	145	276	156	131	182	182	219	207	153	132	147
852573.BIT2	99	105	176	142	96	117	108	112	107	105	10	107	33	99	92	153	94	259	140	149	125	127	69	109	89	85	139	108	118	195	219	91	153	84	99	176	124	121	98	121	108	104	108	84	114	111	96	97	76
852574.EFM2	330	291	341	264	295	292	350	226	177	179	93	108	137	139	132	178	189	271	194	50	63	68	142	238	166	162	240	187	244	359	335	135	215	129	227	252	269	301	223	415	301	266	283	224	433	215	119	122	114
852575.HSM3	182	211	278	200	199	156	237	243	258	311	79	252	168	134	135	180	103	167	178	81	73	92	176	270	208	109	169	149	204	163	255	142	280	191	150	144	148	119	105	130	183	126	164	177	178	206	168	203	170
852576.UBX7	348	291	540	449	209	246	426	459	422	449	91	419	194	330	348	578	260	882	502	26	30	26	197	434	333	344	509	363	270	537	517	209	477	343	339	490	544	325	257	416	371	276	415	347	458	455	399	371	380
852577.CHK1	226	186	225	191	181	141	210	230	290	242	122	297	206	151	141	212	222	336	266	217	220	251	123	204	155	173	234	163	160	182	258	115	231	164	158	189	207	135	124	150	173	142	182	151	176	170	327	313	287
852578.RIF1	360	328	476	274	212	186	265	180	176	180	34	116	72	206	204	281	129	302	166	63	63	78	99	242	146	259	369	270	137	206	207	126	223	169	248	394	351	223	200	248	289	241	309	250	277	244	152	154	133
852579.PPS1	349	368	522	417	289	285	428	376	458	474	150	430	297	384	407	627	227	403	326	132	133	166	267	491	396	370	551	401	319	394	504	351	643	466	340	473	447	288	280	395	482	383	505	418	414	436	327	394	342
852580.DPB3	130	172	178	166	167	194	220	79	72	71	83	56	85	138	131	166	113	125	89	83	106	96	145	204	213	100	145	109	240	207	314	319	471	372	124	162	166	94	121	112	169	123	164	141	165	171	113	137	148
852582.PAF1	492	417	552	427	308	338	437	459	366	437	105	356	164	336	366	419	406	879	508	25	20	31	199	415	285	366	510	441	281	461	438	195	331	265	437	581	441	405	338	440	622	457	553	354	475	412	404	370	447
852583.SAF1	79	71	96	86	58	35	48	186	293	327	60	287	130	116	127	200	29	61	48	65	50	79	57	87	51	72	91	56	116	101	164	33	110	94	60	120	88	19	35	22	62	54	66	59	71	85	126	126	146
852584.DUG2	303	292	421	395	255	241	420	296	276	281	125	251	153	283	265	355	137	328	236	214	296	280	222	429	311	303	492	395	416	424	650	196	388	219	241	391	329	272	243	325	354	250	354	292	433	411	270	246	263
852585.MRPL27	310	318	313	239	375	394	425	371	451	327	216	596	217	202	199	202	722	979	746	159	123	145	236	260	242	156	163	146	232	201	266	282	329	253	145	170	162	152	251	180	298	263	247	335	322	341	361	354	391
852586.SSH1	1859	1875	2622	2264	1503	1443	2074	1369	1789	1822	1368	1690	1393	1813	1700	2468	1161	2686	1439	1070	1201	1254	1696	1813	1531	1836	2340	1855	2162	2512	3013	1452	2444	1742	1955	2663	2389	1718	1557	2311	1880	1743	2006	1766	2441	1940	1222	1244	1205
852587.None	33	23	49	52	21	22	22	138	207	223	48	169	104	35	39	51	58	166	121	39	39	24	17	11	18	33	56	34	32	19	49	31	35	23	24	20	26	25	15	25	31	20	40	27	29	31	109	122	140
852588.None	17	12	13	23	12	7	17	134	140	168	116	68	153	8	8	10	11	12	6	8	2	4	2	6	8	10	15	10	35	8	25	8	18	8	10	4	7	3	6	11	33	24	30	14	16	5	21	13	12
852589.APE3	2852	2382	3302	2637	2152	2123	2979	2551	3079	3295	2600	3199	3180	2392	2284	3171	1240	2516	1518	204	203	231	2027	2282	1948	2384	3462	2611	2955	3187	4016	2180	3654	2523	2209	2808	2717	2270	2099	2718	2574	2188	2686	2558	2932	2741	2138	2137	2013
852590.None	1372	1365	1685	1590	1092	1116	1480	1867	2578	2834	1623	2949	2103	2297	2329	3023	1242	2651	1599	181	192	256	1646	1703	1451	1597	2007	1659	2409	2132	3143	2095	3377	2379	1662	2548	1911	1262	1149	1504	1002	867	968	1352	1058	1327	1114	1032	1099
852591.APM3	322	310	434	397	285	315	406	241	221	247	153	219	162	278	260	392	143	247	169	77	67	94	259	430	304	236	363	283	397	362	528	252	400	282	286	386	380	274	220	291	292	270	342	233	340	265	187	151	161
852592.SNF5	190	178	255	195	113	99	157	219	184	207	12	203	58	139	163	217	140	369	209	46	41	44	81	207	127	117	204	158	176	213	245	99	170	111	137	202	202	112	129	187	193	146	246	90	207	164	166	170	156
852593.BSD2	442	471	484	468	387	430	496	594	661	621	668	759	691	477	433	600	398	1220	548	120	108	125	459	725	490	433	502	398	678	536	801	380	512	436	428	609	515	445	292	473	460	368	416	305	332	306	424	464	429
852594.CTP1	168	173	212	312	174	165	228	154	211	215	141	191	212	137	101	176	86	162	111	150	145	156	182	198	202	96	131	146	306	239	350	122	181	130	192	222	271	293	295	385	199	162	206	328	534	361	351	388	325
852595.None	27	31	28	10	10	10	7	0	0	0	0	0	0	22	23	37	0	0	0	0	2	1	12	21	14	10	15	14	18	16	17	17	18	19	13	9	26	18	17	24	9	6	5	24	27	17	7	6	3
852596.VBA2	84	82	144	176	172	153	188	62	58	44	33	48	48	69	92	103	10	27	23	19	30	27	226	300	224	59	125	69	282	176	404	110	179	131	70	139	85	85	55	111	79	70	72	63	77	54	146	141	141
852597.SUL1	108	90	171	74	37	24	47	87	122	132	23	56	45	130	140	154	57	95	76	84	104	94	49	129	91	82	156	106	150	131	198	32	90	56	57	107	93	72	76	94	34	28	58	94	101	124	119	153	128
852598.PCA1	129	164	253	200	88	82	109	493	632	840	632	338	812	203	211	310	303	674	381	218	266	324	80	146	104	170	330	217	126	198	226	120	219	142	204	197	252	173	138	279	228	171	238	112	124	134	352	402	383
852599.PHO89	26	16	23	210	25	29	50	13	61	13	10	179	26	53	60	96	221	490	320	111	105	143	13	39	23	62	64	63	84	494	162	6	136	16	175	72	258	267	121	388	26	24	15	8	15	8	150	178	146
1466451.None	1	5	3	3	0	1	4	0	0	0	0	0	0	0	1	1	0	0	0	0	0	0	0	0	0	2	3	1	0	1	0	0	0	1	0	0	0	0	0	0	1	2	2	0	0	1	0	0	0
852600.MAL33	199	196	273	118	71	83	77	49	26	38	15	15	32	33	42	42	20	36	35	8	8	2	92	118	104	178	201	167	26	34	59	228	350	260	119	152	162	139	179	152	264	242	247	186	215	243	33	27	42
852601.MAL31	189	176	256	161	96	86	157	413	628	559	113	853	262	112	132	195	133	406	204	177	194	196	59	110	103	117	209	143	99	90	145	184	311	245	106	188	160	114	153	165	248	205	298	186	360	225	354	421	376
1466452.None	1	0	0	0	0	0	3	2	2	1	1	0	3	1	0	0	0	0	0	0	0	0	0	0	0	0	0	0	0	0	0	0	1	0	0	0	0	0	0	0	0	0	0	1	1	1	0	0	1
852602.MAL32	14	17	12	53	9	13	22	13	30	11	11	17	16	9	5	7	19	22	29	25	22	30	12	13	12	8	15	11	10	7	23	34	28	32	10	15	14	16	27	11	22	21	20	16	42	39	34	39	31
852603.PAU24	7	3	8	3	2	0	4	5	16	6	3	33	5	2	4	3	6	12	5	11	1	2	5	12	7	5	8	11	5	1	9	4	1	5	3	0	1	5	11	14	2	2	0	10	3	12	16	23	19
852605.COS2	23	10	15	28	3	0	3	21	72	78	2	3	10	8	6	8	0	0	0	0	0	0	4	1	0	9	5	5	31	22	25	19	16	16	11	12	5	2	8	0	7	2	4	27	37	39	0	0	0
850289.GEX1	0	2	1	17	33	28	18	9	14	18	8	11	12	0	1	0	6	7	4	27	26	23	0	0	0	3	17	5	0	3	0	4	1	0	0	1	2	23	13	27	8	8	9	1	9	10	13	6	13
850290.VBA3	0	0	0	31	12	22	18	2	8	6	8	8	1	1	0	0	10	5	15	0	2	0	21	42	31	42	73	44	21	17	22	0	3	0	28	46	36	63	31	99	69	52	74	0	2	0	8	16	20
850291.None	0	0	0	1	0	0	0	0	0	0	0	0	0	0	0	0	0	0	0	0	0	5	0	0	0	0	0	0	0	2	0	0	0	0	0	0	0	0	0	0	0	0	0	0	0	0	2	2	2
850292.HMLALPHA2	22	47	24	1	44	61	45	1	4	3	4	6	1	26	12	14	0	0	1	0	0	0	0	0	0	0	0	0	0	0	0	0	0	0	0	0	1	0	0	0	1	0	0	0	0	0	152	153	144
850293.HMLALPHA1	1	0	0	27	124	91	143	1	7	4	0	0	0	0	1	3	0	0	0	0	0	0	0	0	0	0	1	0	4	3	5	0	0	0	0	0	0	0	3	0	0	0	0	0	0	0	0	0	0
850295.CHA1	762	832	1140	186	215	167	265	664	455	471	40	56	118	120	148	189	33	131	73	66	53	57	58	237	100	96	134	132	1276	996	1931	92	167	135	94	283	134	196	104	287	41	29	67	51	76	75	28	30	23
850296.VAC17	262	218	326	201	217	186	210	257	189	183	106	163	118	131	144	185	130	190	171	65	74	113	134	268	153	198	290	222	280	295	341	144	212	168	192	260	226	238	173	262	340	269	269	182	236	173	183	221	190
850297.MRC1	205	222	287	248	143	123	173	165	129	119	24	99	57	157	144	230	120	202	136	11	13	19	88	203	141	216	260	222	101	179	162	111	165	120	195	307	248	127	163	181	199	178	196	167	218	205	128	118	119
850298.KRR1	1004	931	1126	960	942	975	1117	797	711	662	157	529	283	629	548	685	1201	1901	1266	138	213	206	605	867	682	770	913	727	1096	886	1188	625	891	659	882	968	914	1169	793	1269	1022	857	1000	749	1218	672	621	654	606
850299.FYV5	5	13	7	2	9	7	1	0	2	0	2	1	0	8	4	5	1	0	0	1	0	0	6	7	0	0	3	0	8	1	9	4	2	3	9	3	3	3	2	1	5	15	9	1	8	5	1	1	0
3289591.ADF1	0	0	0	0	0	0	0	0	0	0	0	0	0	0	0	0	0	0	0	0	0	0	0	0	0	0	0	0	0	0	0	0	0	0	0	0	0	0	0	0	0	0	0	0	0	0	0	0	0
850300.MIC10	708	824	790	430	636	652	633	702	838	870	178	564	294	633	751	737	428	515	426	100	101	133	613	495	484	383	336	303	708	621	760	678	870	635	445	558	479	416	563	364	721	683	593	700	669	634	300	381	336
850301.PRD1	534	496	892	635	323	293	604	658	790	848	170	829	382	648	633	915	366	694	455	647	691	744	412	603	458	613	940	817	733	755	1064	319	669	470	528	756	705	380	435	533	550	520	754	705	581	783	565	574	577
850302.PEX34	211	280	275	221	185	205	217	273	288	314	249	286	278	151	125	181	171	269	194	448	446	510	160	231	189	123	167	129	186	183	272	234	395	306	114	136	166	177	156	196	133	109	111	160	182	174	195	217	201
850303.KAR4	109	147	149	136	234	284	248	82	63	66	28	91	37	80	95	115	45	89	67	60	51	55	98	133	103	117	124	81	149	82	142	75	103	86	93	125	102	78	104	108	126	113	105	132	124	116	66	63	66
23547378.RDT1	2	1	3	98	1	0	1	0	0	0	0	0	0	1	2	1	0	0	0	0	0	0	1	2	1	11	1	5	14	2	13	2	3	4	2	1	2	2	3	5	2	2	5	1	2	0	0	0	0
850304.SPB1	1029	1008	1383	810	580	576	852	1098	687	616	129	656	248	473	456	571	995	2067	1350	148	184	189	230	552	383	818	1112	865	398	1111	583	275	512	362	760	1117	972	982	757	1210	1262	1015	1147	796	1533	857	727	730	683
850305.PBN1	286	304	411	330	245	252	326	269	343	317	107	407	201	320	319	454	162	340	213	25	20	23	219	316	267	287	421	317	287	356	429	256	466	358	268	393	362	203	210	297	275	215	283	292	323	311	297	320	301
850306.LRE1	163	156	255	156	125	110	162	191	214	225	21	171	54	187	191	281	109	192	135	14	12	26	81	162	119	137	252	219	157	199	213	120	224	146	123	219	191	100	94	145	166	152	174	150	164	154	117	159	133
850307.APA1	1187	1227	1440	1345	908	901	1191	1303	1020	1068	452	925	576	1026	1026	1521	943	834	1043	133	122	148	548	796	628	1397	1753	1369	827	1082	1138	646	1130	808	1255	1552	1636	956	1039	1084	1318	1142	1300	1591	1972	1736	1196	1266	1231
850308.None	148	97	146	132	83	54	123	291	407	510	213	200	313	424	370	535	95	159	130	39	39	35	98	91	92	91	136	127	98	152	155	142	241	194	79	75	113	128	269	159	191	160	199	483	497	504	237	237	203
3799968.None	6	2	6	15	2	0	0	6	8	13	8	20	11	8	6	10	9	43	10	24	19	19	2	0	0	2	3	0	2	0	9	3	2	4	2	4	1	0	0	1	2	1	0	3	2	3	23	27	16
850309.SPS22	9	7	7	21	7	4	8	10	26	23	0	45	7	8	9	11	25	74	42	76	54	77	7	5	2	6	3	5	1	10	4	15	18	23	7	3	10	10	9	4	1	2	0	4	13	6	45	44	56
850310.POF1	153	144	155	123	175	160	153	252	250	219	156	217	177	133	150	172	92	130	138	26	23	19	144	141	134	71	86	71	202	143	206	120	175	146	103	149	126	86	81	96	147	136	123	149	107	117	134	147	129
850312.EMC1	750	646	889	760	490	471	638	798	825	898	374	733	541	754	696	1016	595	737	728	113	101	140	378	712	490	734	851	736	769	1042	979	461	883	602	632	1030	886	615	499	752	846	683	828	640	833	728	568	583	571
850313.MGR1	153	135	256	167	82	88	122	225	179	184	10	193	56	97	101	180	91	271	131	21	10	10	90	119	113	91	157	123	113	189	145	68	98	96	102	178	165	74	56	126	160	110	162	100	123	102	201	193	160
850314.PDI1	2807	2691	3589	3282	2322	1975	3023	2904	4263	4369	3950	5148	4073	4001	3940	5057	1907	4494	2499	529	543	571	4141	4103	3792	3097	3968	3082	3404	4296	4326	3045	4657	3330	2991	3770	3883	2290	2281	2730	2836	2453	2869	2870	3086	3132	4238	4396	4095
850315.None	11	14	8	3	3	10	13	12	13	26	2	12	3	7	15	14	4	19	8	50	50	68	5	8	6	9	7	1	17	14	12	15	23	10	11	7	12	3	4	10	8	2	7	5	10	13	5	13	7
850317.GLK1	163	175	301	431	286	237	442	400	703	592	191	1532	344	496	513	822	182	470	257	333	331	351	281	332	277	287	529	360	352	481	666	896	1686	1337	219	247	311	229	661	372	882	672	1022	1065	595	1290	2354	2413	2340
850318.GID7	170	161	240	231	166	154	244	164	192	186	55	192	64	145	182	249	79	197	155	111	93	133	117	131	127	184	283	207	180	246	211	95	127	98	125	226	233	101	150	187	165	121	143	243	258	233	163	177	151
850319.ATG22	124	82	135	104	110	88	147	89	133	91	62	188	77	71	105	141	77	99	105	13	16	24	92	93	94	69	135	77	129	105	210	100	185	128	80	99	81	87	65	111	127	95	127	96	104	115	189	169	170
850320.SRO9	44	40	66	40	28	28	43	57	49	70	28	57	25	27	33	41	160	175	115	14	7	6	23	19	22	29	32	19	18	32	25	13	32	16	29	31	34	24	27	25	55	45	40	23	24	30	60	57	66
850321.GFD2	558	569	977	457	356	315	557	424	362	320	141	317	189	214	208	305	421	1188	553	3387	3627	3996	177	256	279	227	406	298	248	672	413	243	463	367	292	424	462	304	227	504	665	458	785	251	487	335	459	484	416
850322.GRX1	950	1058	882	1251	778	813	698	863	1034	1109	1638	927	1254	1694	1706	1717	455	206	349	324	382	447	2519	2422	1912	1070	856	832	1677	1404	1679	1816	2004	1399	1370	1464	1373	1625	1095	1567	901	837	698	576	426	451	1162	1162	1162
850323.LSB5	351	373	654	509	238	240	454	684	673	713	196	706	346	264	254	510	345	1247	510	57	71	74	264	395	401	265	537	415	483	700	863	219	414	303	310	496	526	276	278	460	438	348	568	404	639	577	417	453	449
850324.MXR2	220	248	239	361	224	242	288	195	305	262	261	316	242	216	234	255	126	207	119	68	77	84	459	275	286	172	207	160	275	238	303	442	561	461	223	236	260	167	189	182	174	151	135	248	227	212	292	282	288
850325.STE50	226	209	385	279	182	173	248	190	173	157	29	223	63	199	189	293	121	369	198	188	166	224	126	260	204	200	343	230	268	305	373	170	277	192	168	304	330	196	145	215	270	187	286	177	232	218	149	135	151
850326.RRP7	665	648	1040	780	589	546	817	894	670	666	473	739	587	452	368	687	628	1489	834	53	36	55	321	694	550	454	661	493	596	689	806	429	701	531	548	718	695	607	498	747	714	579	731	621	1033	665	593	609	559
850327.HIS4	1086	1064	1576	1245	919	855	1220	869	1613	1472	693	1258	1028	1129	1103	1636	318	604	425	329	316	323	983	1301	1058	2054	3107	2406	1648	2141	2418	1105	1888	1363	1008	1805	1241	745	1261	1015	1213	1059	1335	1890	2933	2071	1131	1064	1103
850328.BIK1	262	211	304	253	165	160	268	239	186	221	63	174	96	199	193	248	135	307	218	63	72	58	122	223	193	235	317	245	167	325	258	113	221	141	234	330	319	202	162	288	275	201	270	217	230	205	154	172	178
850329.RNQ1	706	721	775	654	474	389	559	587	566	616	90	439	190	551	583	702	411	956	550	102	91	91	196	236	197	606	811	566	445	644	472	381	555	405	640	943	673	499	486	568	699	597	722	668	927	609	409	413	422
850330.FUS1	25	23	28	44	136	113	134	1	11	5	0	10	2	14	14	13	1	3	7	4	2	9	70	132	101	12	23	12	23	12	19	1	3	11	7	5	8	8	3	7	7	7	5	12	5	6	8	11	4
850331.HBN1	141	111	180	138	11	21	8	28	63	12	9	55	18	165	173	198	23	32	44	6	10	3	110	165	146	117	194	141	47	105	80	13	24	6	138	156	166	146	35	114	42	36	37	16	9	18	61	43	31
850332.FRM2	34	20	30	56	4	2	1	3	2	0	2	20	0	13	16	22	28	23	18	5	3	4	7	13	11	15	16	11	8	9	23	10	16	6	2	6	11	17	13	12	4	12	11	13	13	21	28	26	24
850333.AGP1	361	359	555	390	278	247	398	1215	1047	951	434	655	626	158	160	211	371	983	567	189	181	247	301	265	276	385	590	460	123	170	196	282	480	391	300	209	440	399	366	592	917	696	1122	419	1457	492	462	539	620
850334.KCC4	88	85	135	85	110	94	122	97	44	46	7	43	21	39	28	47	56	149	100	7	3	6	60	130	104	80	156	110	62	120	96	28	83	53	70	105	113	62	65	83	130	90	93	87	111	101	47	61	88
850338.None	15	11	9	17	0	0	0	16	30	36	24	15	35	1	6	5	0	2	0	1	0	0	12	13	10	3	11	4	11	9	23	11	23	7	8	0	8	8	3	7	10	5	5	9	1	13	4	11	4
850340.None	23	7	17	64	260	228	254	0	0	0	0	0	0	2	11	11	0	0	0	0	0	0	0	1	0	25	13	15	22	61	36	9	27	35	144	117	164	0	0	0	107	79	66	81	94	123	0	0	0
850339.None	0	0	0	0	0	0	0	0	0	0	0	0	0	0	0	0	0	0	0	0	0	0	0	0	0	0	0	0	0	0	0	0	0	0	0	0	0	0	0	0	0	0	0	0	0	0	0	0	0
850342.LEU2	199	224	327	558	186	137	247	561	642	632	459	401	559	397	364	566	253	511	359	117	133	148	302	344	342	349	525	384	171	232	246	354	671	470	434	388	674	369	696	467	345	330	371	1202	1856	1385	544	553	506
850343.NFS1	535	503	722	560	381	335	488	675	748	780	187	859	399	650	612	806	469	1281	633	80	80	84	390	478	389	389	534	408	432	620	656	424	784	463	533	768	689	469	400	612	558	389	577	456	657	458	459	562	523
850344.DCC1	128	124	191	113	95	85	123	188	191	163	94	240	132	80	72	142	101	311	149	83	81	87	113	149	119	72	124	141	110	128	168	94	154	117	103	133	141	104	89	121	137	134	131	90	115	89	182	159	172
850345.BUD3	130	135	196	174	174	151	162	273	230	303	96	222	164	114	114	160	177	351	307	149	129	151	188	362	293	210	280	235	164	178	277	88	205	145	156	220	194	139	86	161	181	167	204	89	122	98	207	251	211
2746859.YCL011C-A	212	203	174	191	125	197	156	211	265	275	215	277	223	216	182	224	183	216	162	56	24	63	111	118	105	96	96	76	155	152	175	216	352	238	122	153	114	120	105	100	153	153	129	112	130	93	187	202	216
850346.GBP2	1241	1154	1803	1471	870	829	1390	1411	1342	1489	504	1277	756	1138	967	1635	921	2390	1351	443	494	540	742	1098	987	1188	1890	1430	1415	1824	2053	752	1502	1071	1227	1866	1625	1084	895	1410	1319	1035	1460	1083	1562	1266	816	847	777
850347.SGF29	212	233	358	270	175	141	266	195	199	174	43	252	109	175	188	298	173	482	292	16	16	13	89	164	149	176	311	250	175	360	362	140	313	204	189	401	263	167	137	284	226	158	274	176	291	249	189	208	170
850348.ILV6	869	816	1241	1113	847	742	1267	1411	1539	1691	445	1114	772	745	765	1221	1012	3324	1466	442	405	444	496	622	604	1142	1631	1371	723	1651	1142	625	1180	842	830	1019	1188	828	794	1257	1176	1018	1435	1115	1469	1265	1314	1288	1358
850349.STP22	131	121	250	180	83	62	167	208	237	221	32	167	83	156	132	226	106	389	208	76	69	88	67	69	100	120	233	173	139	296	243	69	147	120	141	160	210	104	107	148	175	132	229	134	202	195	163	204	171
2732686.VMA9	1019	1023	851	847	1214	1593	1055	621	990	946	1550	791	1058	972	871	894	615	392	437	502	541	614	1808	1291	1159	620	529	530	1559	825	1321	1048	1157	770	1000	585	734	898	898	752	1064	891	716	998	924	778	991	947	890
850351.LDB16	237	230	326	246	250	229	334	304	284	296	186	331	306	152	150	244	137	462	239	79	82	77	178	239	209	164	276	206	203	342	333	191	339	273	170	265	212	257	203	305	267	277	304	213	295	242	316	283	268
850352.PGS1	115	92	118	92	68	91	87	108	71	107	30	72	37	113	95	115	94	88	82	35	43	62	58	82	69	56	82	67	81	89	122	63	97	82	64	114	90	58	58	67	124	88	111	92	111	96	55	87	81
850353.None	313	324	412	369	386	364	459	228	254	286	215	236	235	309	284	349	188	246	204	270	266	252	331	334	319	230	278	226	467	375	567	279	489	372	291	387	384	270	241	323	289	265	343	270	395	269	229	207	190
850354.RER1	593	672	709	596	719	770	809	814	1384	1196	1152	1301	1444	417	447	620	493	1103	619	257	300	300	673	745	614	478	535	457	770	628	882	777	1133	847	454	630	588	478	474	584	491	469	473	489	640	477	592	637	626
850355.None	14	11	3	15	6	10	4	5	3	9	6	4	14	21	10	17	6	10	10	3	0	6	13	17	8	16	14	16	32	12	24	8	5	6	9	13	12	11	3	12	7	8	13	11	10	12	4	1	3
850356.None	23	17	21	28	35	60	37	20	22	19	8	17	20	15	18	32	8	21	11	38	40	27	31	24	17	22	18	16	27	16	33	27	29	26	15	21	18	22	12	22	19	14	20	5	10	10	26	22	29
850357.None	44	44	33	22	34	23	25	0	0	0	0	0	0	14	17	17	0	0	0	0	0	0	20	21	12	18	22	14	21	14	29	28	33	23	15	10	18	11	14	13	24	26	14	19	26	21	0	0	0
850358.CDC10	560	594	742	716	469	516	723	753	931	871	633	787	804	600	585	860	482	751	550	255	245	284	442	767	568	506	728	597	633	792	862	536	827	625	568	810	663	531	492	616	680	621	740	612	884	687	503	563	607
850359.MRPL32	232	264	217	174	336	308	336	459	468	418	178	409	243	173	134	144	364	500	412	163	183	207	190	229	182	107	120	94	195	133	206	199	294	188	155	125	157	123	201	170	245	192	201	318	286	291	262	293	264
850360.YCP4	847	851	1222	919	760	727	991	1144	1339	1345	528	1730	789	551	561	930	633	1702	967	82	89	110	630	769	692	620	1055	804	623	832	943	719	1258	917	622	662	841	533	607	683	1041	821	1044	720	828	1015	1134	1147	1152
850361.CIT2	185	173	204	391	163	145	211	286	366	384	50	282	123	632	595	709	63	144	77	110	97	115	152	218	128	349	428	371	1737	284	2145	583	908	695	102	136	95	409	248	442	267	214	252	226	133	247	203	237	220
850362.None	33	42	56	32	30	39	51	15	8	13	0	14	1	30	26	38	8	20	20	6	3	1	52	67	67	16	18	18	33	59	57	35	69	58	17	32	31	18	23	17	17	11	28	33	60	61	9	9	11
850364.None	77	57	82	140	217	197	206	232	1131	1168	360	364	580	95	85	84	70	82	92	40	58	53	133	184	157	170	256	200	114	83	126	292	485	364	53	53	49	94	112	115	57	57	47	163	77	145	99	82	83
850366.SAT4	497	487	668	458	375	286	507	426	453	489	165	538	264	394	362	539	324	633	516	131	144	158	361	557	447	449	606	471	474	568	606	263	441	324	378	386	487	349	385	448	562	513	601	566	613	611	417	419	420
850367.RVS161	841	773	1087	1351	1342	1475	1772	1202	1314	1399	649	1232	1126	1109	1085	1535	549	749	635	98	92	93	1145	1724	1385	965	1316	1031	1214	1067	1623	1065	1706	1288	944	1298	1184	760	758	908	752	697	725	890	992	974	775	802	736
850368.ADY2	9	11	15	19	24	22	27	7	1	5	4	1	2	7	6	4	0	0	1	1	0	1	5	10	4	2	9	19	26	9	13	8	18	17	3	2	8	5	2	6	12	10	9	8	4	4	3	6	5
850369.ADP1	407	381	519	305	259	224	310	503	809	803	417	912	585	362	322	531	454	1026	618	864	852	907	317	530	358	288	422	321	586	487	838	280	481	376	250	372	341	232	230	258	315	272	376	356	324	381	742	754	674
850370.PGK1	21316	19139	25164	25199	18557	17248	22868	23583	21888	22652	11362	19450	16318	17772	18249	23242	15887	20286	19468	1824	1689	1945	15371	13648	12337	25819	33771	26300	11170	13002	14384	11197	17465	12778	22751	20004	26881	20654	26385	23201	15943	13523	15564	37629	36159	38178	24211	25060	24295
850372.POL4	83	111	144	97	56	67	85	76	101	110	52	66	45	66	85	93	57	61	51	33	38	32	53	100	87	76	120	95	113	106	134	39	87	46	84	128	121	50	75	67	96	96	102	86	104	85	53	63	84
850373.CTO1	119	113	146	126	114	123	145	214	204	261	255	175	264	81	89	99	86	132	98	157	148	191	100	175	114	64	93	60	59	94	84	194	237	192	78	109	99	123	79	130	81	91	91	89	125	118	145	147	162
850375.None	557	668	706	571	545	605	611	332	226	238	88	264	99	334	388	429	523	493	595	122	124	108	293	598	383	431	491	387	591	590	656	321	491	368	499	669	596	689	531	720	641	572	611	450	891	478	310	305	273
850376.CWH43	662	506	762	615	406	334	568	752	804	911	247	875	472	676	624	915	501	1133	785	145	148	161	273	382	311	566	1082	776	494	960	688	352	697	454	585	905	713	595	449	728	852	559	829	546	790	651	821	814	801
850377.SRD1	39	34	34	90	5	13	14	0	0	0	0	1	0	21	17	22	2	3	1	0	1	1	5	17	7	12	17	10	109	43	134	40	23	41	12	13	17	14	18	11	19	23	25	20	13	16	1	4	2
850381.MAK32	131	125	193	152	89	98	165	137	146	159	52	147	77	108	116	163	78	204	113	81	89	65	187	370	297	136	212	207	93	144	147	88	170	123	136	146	173	92	88	134	183	135	173	97	141	130	96	83	97
850382.PET18	100	64	71	70	50	54	70	283	426	444	190	271	220	128	107	133	89	82	97	121	118	152	114	141	134	62	59	53	372	89	453	154	224	171	66	112	49	98	180	103	40	45	53	330	649	311	84	76	89
850383.MAK31	204	241	223	275	267	295	253	172	383	324	403	302	402	222	183	225	296	210	279	738	705	865	697	520	592	135	140	108	262	227	308	71	120	103	218	170	250	268	159	290	216	189	166	101	106	79	709	728	714
850384.HTL1	318	386	357	309	397	422	353	93	139	109	116	103	113	183	209	225	89	84	98	14	9	8	743	1118	822	192	206	124	842	259	914	467	690	498	201	287	280	274	213	272	220	237	217	253	261	239	65	70	73
850385.HSP30	50	56	69	48	60	70	64	27	158	181	11	52	40	646	633	903	23	47	36	9	3	9	58	113	72	23	38	39	63	68	96	862	1445	1092	36	44	37	33	40	28	43	29	47	72	40	95	12	15	10
850386.None	15	17	14	11	9	3	9	1	0	0	0	0	0	12	13	13	0	1	1	0	0	0	19	21	14	9	10	10	31	11	23	26	22	19	5	10	11	9	16	21	17	14	20	16	13	8	0	0	0
850387.None	341	307	459	316	221	254	347	244	326	385	113	267	259	275	282	412	78	161	122	48	70	81	568	996	767	227	350	276	576	464	863	336	581	442	224	390	296	238	216	366	250	226	263	253	317	309	144	141	152
850388.SLM5	150	124	192	135	96	120	135	188	224	259	38	167	89	138	128	165	115	290	158	106	95	115	121	230	164	58	124	69	96	134	131	87	133	128	89	117	110	75	107	110	157	143	164	180	232	222	118	150	148
1466398.None	2360	2389	2713	2404	1321	1489	1635	1180	1513	1674	590	596	775	1985	1833	2039	1384	513	1408	5451	5317	6168	2339	2686	1997	1909	1973	1824	1500	2192	1970	1151	1832	1383	2642	3011	2864	2210	2247	1987	2597	2329	2276	3397	3101	2886	1709	1734	1666
850389.PMP1	1879	1973	1967	1561	1367	1462	1556	1388	1378	1187	415	1010	475	1325	1108	1473	1213	1945	1337	23	35	48	2075	2286	1912	1388	1623	1294	900	1445	1080	848	1510	924	2082	3009	2168	1596	1472	1571	2372	2046	2173	2015	2780	1766	1005	984	1041
850390.None	18	15	26	14	4	18	15	4	22	7	5	3	9	14	16	34	4	9	4	17	35	25	38	39	31	27	14	21	43	27	45	22	36	22	20	17	24	18	15	16	17	13	20	14	10	14	11	5	12
850391.NPP1	310	285	493	324	220	188	284	249	269	271	97	196	196	262	239	389	152	304	181	107	91	135	333	755	546	277	425	292	228	373	385	164	311	270	227	339	318	256	216	321	372	295	368	218	376	323	217	182	161
850392.RHB1	199	172	255	245	159	218	243	262	255	312	164	219	233	149	143	222	187	362	191	84	101	116	377	491	387	132	222	173	112	243	241	168	280	245	179	202	203	149	144	193	198	171	220	158	210	170	196	215	209
850394.FEN2	311	325	434	446	306	314	505	459	466	487	290	420	470	243	256	453	248	630	459	164	206	178	220	340	339	239	395	306	404	560	693	260	591	423	315	491	467	307	271	503	289	260	400	232	450	318	285	295	241
850395.RIM1	983	1023	841	818	1071	1138	965	967	1133	1124	682	1033	786	766	721	783	1140	1088	1107	444	433	494	1104	1116	870	634	666	525	941	818	951	848	982	761	809	813	827	862	775	856	904	775	685	867	976	700	955	953	904
850396.SYP1	367	307	459	401	267	209	336	502	665	694	553	690	628	374	339	482	235	379	292	519	500	591	462	477	427	320	502	360	344	570	511	314	486	348	326	455	480	245	258	352	390	289	425	345	334	398	454	560	481
850397.RPS14A	12004	12756	13132	12332	12678	13566	13724	9415	11657	12106	13119	9730	12546	9855	9866	11037	8869	8466	8141	6368	6474	7322	12041	10615	9577	11243	12211	10203	7564	13686	8013	12721	16965	12438	11889	11775	12868	11819	11149	12236	12637	11448	12566	13119	14182	11491	8341	8745	8297
850398.BPH1	206	172	217	196	107	108	158	249	311	349	56	252	122	218	140	290	95	221	151	209	236	278	87	212	160	183	266	191	118	189	174	124	226	160	208	218	241	157	136	193	162	131	167	163	163	170	207	217	217
850399.SNT1	365	303	481	368	213	159	246	326	244	308	31	283	56	346	323	438	321	723	421	82	64	80	92	270	199	383	578	446	308	439	453	156	259	204	360	483	423	332	301	415	477	354	471	366	432	377	309	318	332
850400.ELO2	1162	1211	1584	1222	1122	1156	1404	1130	1160	1088	1150	1151	1341	1018	1031	1383	978	1042	1165	137	149	165	860	952	817	903	1116	1033	1007	1313	1239	1013	1895	1343	1008	1711	1401	1181	858	1440	1209	1064	1385	1019	1514	1002	814	849	867
850401.RRP43	532	501	835	549	558	471	703	446	370	328	192	382	237	325	285	441	368	730	491	67	57	65	288	576	442	407	602	487	367	483	545	263	378	316	394	446	567	594	468	756	526	479	598	514	699	523	345	345	351
850402.RBK1	319	390	463	401	279	263	355	213	262	260	165	238	203	442	416	586	111	283	167	63	58	59	277	333	317	250	349	308	568	369	690	344	560	462	252	345	348	209	262	272	401	355	442	326	299	369	202	188	209
850403.PHO87	555	446	669	555	412	400	588	560	600	624	218	657	346	626	610	910	556	992	830	132	115	146	385	630	488	361	493	413	617	821	952	310	567	377	383	609	555	451	392	642	637	478	626	508	692	527	486	520	470
850405.BUD5	58	52	49	53	26	36	55	26	44	45	17	36	18	42	41	53	26	47	32	14	14	7	41	72	63	46	41	46	30	53	57	52	66	42	38	44	56	26	33	45	47	40	48	49	45	58	38	39	46
850406.MATALPHA2	100	133	136	33	192	250	204	103	171	207	74	85	74	39	28	32	2	6	7	15	30	29	167	262	204	111	92	103	78	19	54	72	65	47	43	37	34	101	78	106	10	8	2	96	84	68	0	0	0
850407.MATALPHA1	0	0	0	0	265	273	287	2	0	1	0	0	0	0	0	0	0	0	0	0	1	0	26	13	14	0	0	0	0	0	0	0	0	0	0	0	0	0	0	0	0	0	1	1	0	0	0	0	0
850408.None	7	7	5	13	22	32	19	4	25	15	13	12	8	4	1	1	20	23	23	29	31	41	31	38	37	0	0	1	11	0	3	2	11	5	2	1	2	0	0	0	4	4	4	7	0	6	69	61	64
850409.TAF2	336	350	508	312	175	147	282	362	315	303	33	255	108	220	231	351	171	380	267	42	41	26	142	321	193	254	470	359	234	385	334	153	269	223	264	377	317	282	213	363	357	360	401	223	341	304	281	230	197
850410.None	394	441	439	415	506	429	461	250	444	408	450	333	507	295	281	334	196	305	174	168	180	162	449	416	362	279	233	208	582	402	524	383	553	437	314	369	382	330	271	349	449	392	330	326	375	291	353	322	345
850411.PER1	303	247	376	320	341	343	382	319	466	427	396	450	460	275	306	314	276	413	317	123	191	166	334	363	371	266	339	287	361	419	487	273	408	290	256	388	287	256	257	332	251	258	258	342	380	339	326	353	361
850412.RRT12	113	123	246	200	138	104	239	102	180	159	27	211	71	105	107	217	147	561	277	182	161	181	103	96	123	125	211	162	152	304	322	113	282	180	93	213	214	115	121	203	139	110	221	120	215	197	238	272	218
850413.IMG1	433	449	966	702	421	400	857	746	759	716	98	812	273	365	321	687	795	2767	1077	217	245	276	390	626	654	258	563	433	274	794	539	360	969	762	301	382	609	269	290	520	452	350	722	425	668	685	347	388	369
850414.BUD23	797	841	1407	959	481	473	831	644	441	376	134	398	175	324	253	490	501	1777	702	159	188	237	385	405	463	601	949	724	420	1100	683	309	593	472	805	837	1201	1008	749	1583	909	751	1142	816	1893	1116	416	485	431
850415.ARE1	232	189	453	362	169	130	357	418	312	352	54	229	154	185	163	394	145	650	298	11	17	11	105	144	165	238	573	409	198	486	443	112	329	230	228	568	413	152	162	346	300	212	413	206	436	321	402	461	433
850417.None	3	2	5	6	10	3	0	2	6	7	10	6	4	10	7	14	0	1	0	1	1	3	13	7	4	4	4	9	7	1	16	1	4	1	9	10	2	5	3	4	7	2	12	3	2	5	3	6	1
850418.None	825	879	1374	1257	767	832	1323	758	741	790	216	546	393	609	561	974	534	1317	697	158	172	185	677	788	946	772	1318	1057	832	1386	1262	535	1155	842	780	953	1265	844	703	1459	988	720	1249	619	1280	934	404	448	366
850419.RSC6	490	475	772	493	279	256	420	661	549	597	98	408	206	273	301	499	367	1114	488	153	123	159	236	330	257	360	646	468	317	745	468	149	320	232	365	470	588	330	327	613	443	405	674	367	542	458	429	495	510
850420.THR4	1911	1714	2315	1894	1437	1327	1892	1366	1517	1597	790	1439	922	1472	1440	1957	1500	2261	1815	361	378	440	831	1364	1000	1862	2544	1991	1359	2248	1830	805	1471	1116	1687	2237	2105	1871	1453	2229	2118	1753	2136	1757	2615	1859	1307	1434	1409
850421.CTR86	182	170	216	125	126	112	128	210	158	181	109	134	120	100	91	136	160	255	181	71	69	64	115	152	138	113	185	135	166	186	201	87	144	116	109	155	118	136	118	156	161	138	148	134	190	138	132	105	137
850422.PWP2	1033	964	1780	1267	824	704	1359	1169	898	924	123	793	344	654	632	1092	1229	3335	1764	1668	1517	1720	342	675	541	900	1472	1172	706	1651	1133	413	823	659	939	1373	1444	1179	844	1820	1359	1141	1636	870	1718	1097	1034	1115	1007
850423.YIH1	306	243	388	371	259	256	412	339	486	481	231	374	337	263	255	391	262	743	409	341	375	384	356	295	299	277	428	283	368	428	484	292	539	357	264	293	315	274	251	396	402	303	414	191	284	255	247	296	304
850424.TAH1	215	217	209	561	225	239	202	158	334	304	447	337	377	271	225	239	189	262	171	380	394	377	326	211	190	176	211	171	306	155	306	378	426	309	192	172	211	191	176	178	320	291	238	132	127	111	362	389	359
850425.YCR062W	68	63	136	97	28	35	87	80	85	107	12	128	20	105	90	147	32	129	55	11	4	14	75	88	90	44	134	79	166	156	303	51	128	70	60	109	100	17	33	40	67	62	117	64	47	65	97	109	100
850427.BUD31	44	53	104	77	40	34	72	53	31	37	9	54	22	31	34	58	47	114	83	16	15	10	32	55	41	28	68	50	36	88	61	69	135	81	47	96	73	54	39	75	61	55	68	49	94	37	46	43	41
850429.HCM1	168	133	244	177	109	106	136	264	165	161	20	148	52	126	95	215	176	486	285	21	27	27	56	124	83	132	228	169	157	229	230	44	117	101	156	226	175	160	96	237	253	181	275	92	170	99	235	265	294
850430.RAD18	104	89	136	71	56	59	103	132	147	157	49	146	83	81	79	86	136	281	157	60	41	54	61	97	69	63	102	92	67	79	82	53	69	50	68	76	87	52	86	87	101	82	85	75	107	63	140	119	145
850431.SED4	445	449	637	456	298	250	412	346	323	342	90	170	109	392	377	596	192	455	252	291	316	368	204	320	203	389	559	450	407	589	502	249	420	324	394	668	508	335	335	465	402	389	512	371	617	510	248	242	234
850432.ATG15	66	66	135	81	44	31	54	179	194	178	8	158	56	80	84	144	58	138	98	22	18	19	39	60	61	69	147	112	66	159	111	47	98	85	60	144	100	38	52	68	100	56	122	63	84	74	168	127	151
850433.CPR4	401	350	559	417	283	245	373	482	548	593	321	498	456	564	558	888	213	499	276	64	82	80	291	428	329	542	848	643	359	609	509	399	682	508	426	640	504	669	438	898	518	399	626	369	466	432	558	525	516
850434.IMG2	260	308	355	289	421	506	562	507	490	459	195	552	293	178	203	205	637	1415	606	76	87	100	241	382	324	158	164	141	221	226	240	292	425	351	158	156	218	146	233	167	287	251	274	277	338	289	241	283	278
850435.RSA4	595	535	816	558	405	352	548	624	462	499	257	495	339	259	215	340	673	1227	883	462	474	538	321	378	340	369	576	468	438	772	683	210	447	332	427	569	578	652	454	837	698	589	769	438	773	497	573	602	599
850436.SSK22	201	217	323	195	141	132	234	104	100	117	8	136	43	182	173	280	100	310	183	39	25	43	80	170	123	184	282	253	185	269	341	126	282	168	127	239	211	187	154	261	281	187	249	160	219	208	159	131	133
850437.SOL2	164	168	295	357	199	215	404	477	458	447	77	625	181	180	169	373	276	1000	507	135	148	143	199	274	253	149	335	206	180	335	349	143	378	266	175	231	262	150	135	263	252	186	378	188	252	242	447	467	463
850438.ERS1	107	98	155	99	115	126	118	61	69	55	85	73	82	69	69	113	38	56	39	58	39	50	216	144	146	80	75	64	232	112	298	159	220	166	77	147	110	54	71	69	85	89	95	92	89	80	64	59	55
1466399.EGO2	157	193	134	120	194	282	136	142	265	233	349	190	247	165	138	131	163	92	102	42	51	51	231	172	158	140	108	100	139	135	119	176	171	103	135	98	132	121	106	86	136	108	94	213	163	126	197	178	214
850439.FUB1	151	158	252	153	107	105	173	85	110	98	18	113	39	110	116	167	75	252	109	176	195	210	147	117	153	128	194	99	197	227	206	117	179	149	93	161	135	91	116	119	160	117	121	120	146	147	173	164	164
850440.PAT1	494	457	694	831	458	395	689	1902	1422	1580	260	1325	492	620	545	894	1059	3223	1626	133	118	140	255	496	337	694	1075	882	538	1227	738	341	635	455	694	1124	986	767	558	974	840	687	993	578	930	629	1145	1257	1250
850441.PTC6	117	103	180	118	73	56	135	257	297	248	75	317	140	136	142	240	145	427	216	29	27	32	78	94	105	90	177	145	134	201	219	89	168	117	102	151	189	88	76	113	111	85	119	82	131	125	129	167	174
850442.SRB8	149	147	169	119	62	57	117	121	119	134	25	185	47	84	85	122	138	185	182	48	48	43	75	132	85	90	156	134	70	144	133	53	65	74	85	122	123	72	67	111	137	109	129	92	130	134	168	171	155
850443.AHC2	211	221	216	311	461	495	419	145	133	105	117	123	90	141	144	173	77	43	70	49	56	44	98	108	79	193	227	200	192	122	201	217	253	187	182	122	221	162	191	164	190	228	173	242	221	197	167	158	139
850444.TRX3	259	282	430	534	240	269	339	125	216	196	72	177	122	232	208	388	71	109	62	27	20	19	217	299	227	150	233	170	212	207	362	329	647	399	203	182	281	180	204	325	193	197	250	235	276	284	87	116	102
850445.TUP1	1306	1260	2271	1449	901	697	1451	1778	1218	1269	85	1190	282	790	741	1428	1130	3044	1882	51	57	59	457	677	724	1192	2187	1724	635	1947	1232	555	1205	919	1076	1541	1781	1065	960	1839	1671	1459	2208	1034	1948	1441	1264	1342	1323
850446.None	11	4	1	4	6	15	9	0	0	0	0	0	0	4	3	6	0	0	0	0	0	0	5	7	6	5	1	3	11	2	12	16	9	3	1	2	1	0	5	5	5	3	5	3	7	9	0	0	0
850447.CSM1	85	113	105	71	76	87	89	94	154	107	113	109	133	55	54	57	68	96	67	66	57	66	56	105	84	68	59	59	41	98	70	65	69	47	63	78	76	90	68	93	117	79	86	75	92	78	99	116	106
850449.None	542	514	678	479	412	477	557	484	545	506	334	425	371	256	261	321	680	1713	826	212	176	228	271	376	326	359	422	350	448	595	548	227	349	274	358	408	459	518	482	696	662	560	552	537	1042	530	451	535	508
850450.ABP1	493	413	720	745	409	316	624	816	904	859	142	1012	263	875	857	1233	388	1494	650	84	108	111	343	498	467	542	1042	742	533	1148	781	401	827	505	629	845	805	597	399	720	554	505	665	493	592	606	960	948	960
850451.FIG2	100	95	138	122	157	109	159	46	46	55	3	41	10	58	63	98	38	142	77	38	35	46	19	53	34	93	150	86	83	137	109	42	62	34	69	101	69	56	54	72	113	106	118	79	86	69	84	83	96
850452.None	518	499	656	522	575	642	632	243	351	303	278	338	314	382	351	512	235	405	285	283	284	275	533	721	596	286	337	284	677	482	812	554	892	650	349	384	426	387	425	462	402	338	383	485	564	490	303	314	323
850453.KIN82	58	49	70	43	33	38	51	52	85	94	41	111	53	38	39	62	66	160	100	75	94	61	14	50	20	48	62	50	49	57	50	24	41	39	25	87	56	31	43	48	51	47	62	25	44	30	78	78	68
850454.MSH3	206	193	283	205	122	136	137	291	316	273	150	285	236	138	112	230	218	493	322	434	408	478	73	178	142	174	280	223	187	262	278	98	215	177	206	263	241	171	122	234	212	202	257	180	214	193	207	254	252
850455.CDC39	848	735	1121	732	425	359	508	836	683	639	53	725	180	690	569	978	630	934	947	122	93	118	173	454	291	641	1102	778	382	672	572	276	586	384	635	932	803	645	524	903	791	673	897	609	817	712	688	783	707
850456.CDC50	253	248	275	237	205	222	274	349	634	576	526	544	734	227	208	290	234	295	270	147	137	161	268	430	321	227	292	212	378	252	501	208	453	297	202	297	298	250	151	254	288	221	257	225	259	175	336	312	307
850457.OCA4	216	235	238	201	193	239	237	212	252	229	253	281	252	160	150	177	228	209	237	265	279	358	194	289	198	187	231	203	318	207	369	211	270	199	177	195	170	154	193	157	215	198	182	174	204	160	304	265	270
3077354.None	8	16	17	15	13	17	22	0	0	0	0	0	0	8	13	16	0	0	0	0	0	0	21	16	5	13	22	20	26	20	43	21	41	36	23	18	17	12	19	23	28	27	18	13	20	17	0	0	0
850458.HMRA2	90	106	111	263	202	257	209	13	9	10	131	162	124	98	108	132	156	252	196	5	7	11	150	209	165	79	99	92	397	237	379	102	132	106	114	217	170	129	90	133	185	162	172	104	131	96	131	105	127
850459.HMRA1	181	187	149	250	35	36	35	133	166	157	184	112	123	178	130	186	78	26	79	14	30	23	4	17	7	111	112	100	290	90	359	235	270	194	192	169	164	180	180	170	150	166	136	191	160	168	186	208	161
850462.GIT1	25	29	60	53	23	19	29	38	57	63	4	42	26	63	63	95	39	73	51	44	50	66	66	74	64	43	54	38	56	43	92	46	99	70	18	36	24	18	31	21	30	32	18	34	26	46	41	62	72
850463.None	18	16	18	27	5	1	8	5	3	2	2	6	13	23	12	28	6	8	7	7	4	9	47	78	58	24	59	38	71	63	135	44	86	74	25	41	46	28	10	25	50	29	54	13	14	15	2	6	13
850464.None	20	5	28	42	9	0	9	378	427	537	136	176	302	18	18	38	34	35	36	2	3	1	34	135	85	44	65	54	114	59	177	35	76	45	26	58	47	31	8	45	49	44	62	0	0	0	91	83	86
850465.None	9	12	5	16	3	1	6	225	162	241	67	73	133	12	17	14	10	24	21	1	1	5	19	50	38	28	26	23	42	30	88	23	44	24	17	29	22	20	5	13	35	15	26	0	0	0	45	32	44
850466.None	44	58	105	124	48	41	84	139	192	200	51	99	97	64	80	93	54	79	58	77	72	120	48	84	46	95	109	103	123	52	189	123	239	204	52	57	50	51	94	92	53	47	60	164	132	166	183	207	196
850468.PAU3	1	7	1	11	3	1	0	8	13	13	6	5	16	8	5	4	1	3	3	0	1	3	2	7	6	21	18	16	14	2	29	1	0	0	4	10	6	2	2	7	5	2	2	2	2	2	16	22	12
850469.ADH7	66	56	80	123	31	44	65	25	25	26	13	25	15	74	74	117	24	67	30	31	38	30	138	150	131	123	188	145	157	178	158	0	0	0	118	119	169	90	52	107	96	74	97	56	68	60	37	22	45
850470.RDS1	95	81	140	186	54	77	90	79	94	73	40	101	65	79	73	127	74	161	124	50	38	47	44	147	88	298	490	402	124	182	183	0	2	0	173	252	202	152	96	196	232	190	285	87	108	70	94	102	103
850471.AAD3	96	93	125	75	78	65	99	6	28	25	6	4	2	107	98	132	11	39	16	5	7	10	124	202	163	351	472	421	163	235	252	0	0	0	157	171	204	138	105	178	222	217	270	76	93	88	0	3	4
1466400.None	0	0	0	0	0	0	0	0	0	0	0	0	0	0	0	0	0	0	0	0	0	0	0	0	0	1	1	2	2	0	0	0	1	0	0	0	0	0	0	0	4	0	3	0	0	2	0	0	0
851348.COS7	93	128	106	159	395	360	437	76	157	123	716	334	812	130	147	212	64	285	101	342	296	282	30	59	47	65	66	42	129	136	150	461	705	596	93	155	130	157	153	256	0	0	0	202	146	189	114	127	109
851350.MPH2	0	0	0	0	2	0	3	0	0	0	0	3	0	0	0	0	0	0	0	0	0	0	2	2	2	0	0	0	14	10	20	0	0	0	2	0	2	0	0	0	1	0	8	0	0	0	0	0	1
851351.SOR2	0	0	0	0	0	0	0	0	0	0	0	0	0	0	0	1	0	0	0	0	0	0	0	4	4	0	0	0	1	4	6	0	0	0	1	3	2	0	0	0	0	0	0	0	0	0	0	0	0
851352.HXT15	9	8	16	19	12	5	15	3	9	6	3	11	5	6	6	10	7	13	4	1	1	0	0	5	0	0	0	0	3	10	3	36	65	36	14	8	7	5	8	7	12	7	15	13	25	22	1	4	2
851353.THI13	9	11	7	5	2	17	9	10	27	12	9	20	15	26	21	34	9	5	6	5	8	0	4	2	11	9	9	9	7	6	13	14	17	3	9	4	10	7	15	6	5	15	8	33	50	24	10	7	5
851354.AAD4	109	113	148	563	47	52	86	179	362	289	155	539	265	112	131	202	295	258	273	433	418	489	110	128	129	612	872	718	201	145	263	93	188	131	77	117	121	143	94	159	65	56	85	117	132	107	317	317	288
851355.None	4	15	10	27	16	13	26	0	0	0	0	0	0	21	24	34	0	0	0	0	0	0	43	55	45	28	46	31	74	35	108	48	58	44	10	32	27	16	17	15	8	12	10	18	20	6	0	0	0
851356.None	325	348	446	397	184	187	269	33	61	79	68	55	100	321	347	519	319	180	275	137	122	114	304	360	366	717	991	813	336	380	507	246	457	349	406	471	481	584	543	658	280	291	310	652	677	652	428	466	458
851358.LRG1	82	46	96	98	97	84	136	62	38	52	8	29	13	45	58	71	23	55	38	11	11	16	54	136	105	91	106	94	58	84	93	28	65	64	66	105	70	65	45	72	98	64	93	42	80	73	29	45	31
851359.ADY3	95	93	105	85	122	146	132	53	77	58	43	137	54	64	54	81	131	119	115	464	524	543	42	87	52	63	68	58	75	47	111	71	115	84	53	87	74	53	96	62	56	31	46	153	142	127	183	198	215
851360.GUD1	32	43	62	51	31	32	60	26	35	25	12	103	15	31	38	68	15	25	42	38	39	43	49	68	64	18	44	29	23	48	39	32	45	36	25	35	35	15	22	28	22	19	28	50	54	61	60	44	60
851361.AIM6	323	262	386	314	297	253	375	521	687	786	832	639	960	374	407	521	165	324	209	151	171	190	514	562	450	248	279	265	571	500	743	493	788	540	328	398	340	286	262	376	281	218	310	365	376	383	343	345	378
851362.PHO13	565	568	785	684	498	448	663	710	756	783	523	693	532	562	513	802	498	787	649	186	189	202	546	661	568	457	623	511	586	725	769	568	932	781	537	706	692	633	637	859	647	579	767	786	1133	968	559	599	566
851363.YPD1	475	476	647	481	465	466	524	606	571	471	261	652	418	365	311	436	682	1254	912	159	175	225	415	559	434	340	442	323	410	318	458	231	350	272	306	339	367	503	405	572	641	551	555	474	704	443	588	640	598
851364.GYP7	350	334	500	509	234	227	388	210	460	489	150	642	265	1040	1031	1635	131	363	197	130	137	174	249	533	414	959	1390	1088	439	505	644	489	865	684	496	807	688	493	383	699	284	242	338	437	241	511	280	306	307
851365.MFG1	140	110	172	133	64	69	95	82	110	103	16	168	29	107	124	184	95	206	124	15	19	27	71	96	103	144	219	220	93	171	139	65	135	73	109	120	137	130	98	147	129	121	158	101	89	115	132	147	161
851366.OST4	507	606	431	428	614	876	509	18	14	23	12	7	17	409	359	378	169	41	142	70	57	72	680	586	433	458	280	286	538	404	524	476	562	347	444	401	365	529	415	362	555	471	366	491	478	282	334	359	310
851367.BRE4	583	558	907	675	465	417	568	517	715	667	368	700	504	474	493	738	390	840	599	309	347	372	402	859	608	530	908	670	631	714	922	350	754	543	516	692	714	598	426	764	686	527	733	491	718	570	472	477	453
851368.PTP1	180	168	252	316	121	109	198	190	216	246	75	276	131	272	272	490	79	291	142	118	109	115	94	151	168	146	183	129	216	270	340	110	233	167	282	398	391	153	111	189	151	121	199	165	271	240	180	201	166
851369.SSB1	11146	10034	13672	10432	8938	7921	11915	12250	11672	13352	3416	8589	5671	7498	7800	10283	13275	20684	16576	1745	1714	2006	5499	7045	5471	11159	14376	11259	5767	10017	7657	5635	9486	6503	10559	13015	12517	13012	10980	15880	12000	10023	11752	10609	14199	11298	9484	9691	9464
851371.HO	9	4	4	83	206	162	195	4	5	4	2	15	4	1	3	3	3	14	4	9	10	15	66	90	70	5	8	2	6	6	7	1	2	4	10	4	8	3	10	4	4	1	3	7	8	11	2	4	12
851372.GCS1	556	500	772	656	620	576	784	643	716	766	310	651	426	413	443	675	327	678	462	147	128	164	589	849	719	496	809	603	758	854	1058	582	944	631	505	688	698	538	470	741	761	632	813	489	658	595	555	607	640
851373.SHS1	430	329	470	417	271	287	410	479	440	451	139	517	218	335	329	514	360	878	513	55	39	66	240	575	378	428	540	459	300	404	442	232	420	302	360	530	472	405	286	477	424	359	447	303	564	312	333	396	406
851302.WHI4	258	237	324	260	152	161	234	308	268	281	38	252	112	150	143	274	199	295	246	65	68	71	145	252	242	195	321	234	229	376	340	93	212	128	173	274	263	293	177	379	286	233	369	175	244	193	248	272	278
851303.HBT1	147	117	195	120	65	51	101	111	70	107	9	54	25	90	91	173	37	59	43	15	8	8	86	133	149	89	198	148	130	137	189	52	157	111	94	144	146	79	69	102	94	72	112	96	121	106	37	76	64
851304.FMP45	13	15	23	42	7	7	18	186	176	229	13	222	63	8	10	8	8	14	6	7	10	19	24	28	25	12	25	21	38	28	96	14	34	12	16	29	36	13	10	18	17	16	12	6	6	7	118	133	110
851306.CDC13	118	95	155	140	49	46	92	94	59	93	3	49	22	103	93	149	34	122	57	25	31	45	50	85	72	93	154	100	78	135	108	77	107	94	96	132	154	89	74	143	115	87	108	73	91	82	63	45	50
851307.DTD1	378	350	443	390	267	303	347	206	265	236	214	295	235	329	298	388	183	248	181	71	69	92	465	606	489	308	348	285	382	329	559	353	499	323	338	352	439	328	291	348	303	259	292	284	341	272	340	365	351
851308.None	24	22	31	31	10	10	17	35	34	30	22	37	18	15	24	20	27	35	29	22	30	34	8	17	9	22	36	31	45	42	55	12	15	35	13	45	33	31	26	29	22	26	29	19	28	32	37	50	37
851309.TIM22	261	264	421	324	305	267	401	307	301	339	131	313	230	173	126	212	221	477	307	10	11	11	203	278	256	179	306	227	219	343	314	168	390	261	197	277	279	252	211	364	283	267	307	249	426	277	150	190	170
851310.RRI1	33	62	73	67	65	50	71	56	65	69	29	69	53	56	63	74	57	108	67	27	32	21	48	112	91	46	58	43	61	58	110	65	69	80	39	67	53	63	43	74	50	54	54	69	52	63	54	62	42
851311.GDH2	329	284	392	379	326	306	393	271	285	271	162	261	213	266	279	386	236	300	300	190	174	154	630	1185	893	250	388	268	569	349	795	238	392	356	221	460	288	304	223	332	333	269	377	259	323	327	197	274	224
851312.PRR2	27	16	30	51	65	48	80	21	16	23	8	17	11	28	21	34	0	4	1	4	4	5	151	230	208	34	42	34	82	27	136	21	22	26	25	53	42	20	26	34	59	23	70	29	38	25	10	11	11
851313.NOP6	837	985	1191	809	637	744	864	890	691	692	306	452	264	429	401	599	1000	1517	907	35	52	52	490	817	679	774	903	763	663	926	774	406	679	493	590	723	699	1069	720	1361	816	729	818	523	1189	667	494	497	479
851314.SHR3	1262	1256	1455	1366	1427	1683	1841	1191	1682	1559	2401	1399	2270	1024	856	1239	924	761	938	765	783	782	1770	1448	1408	709	839	765	1907	1401	2367	1568	2334	1840	1024	1310	1133	1241	1025	1376	1146	1051	1122	1094	1555	1104	1187	1237	1278
851315.None	59	43	70	46	36	24	55	32	22	45	23	50	19	20	34	49	47	156	92	33	28	46	21	53	35	25	48	44	38	47	68	24	35	42	29	54	42	52	27	58	47	46	58	20	43	21	104	101	94
851317.UGA4	9	18	23	19	9	6	8	3	11	3	0	7	3	2	2	5	2	11	6	7	3	3	10	13	6	12	6	9	19	14	17	3	8	1	3	3	10	2	6	6	7	0	0	3	6	10	12	7	2
851318.CWC2	146	165	180	126	100	90	124	150	131	138	69	135	85	84	63	93	92	214	138	76	91	109	67	131	68	105	153	102	134	163	180	57	117	75	152	195	170	171	113	207	124	122	183	84	141	87	116	141	125
851319.NHP2	2302	2460	2348	2118	2864	3106	2834	2412	2351	2141	1545	2136	1936	1533	1376	1676	2265	5164	2897	371	417	428	2270	2565	2119	1935	1949	1649	2176	1981	2367	1895	2347	1851	2052	2192	2059	3068	2339	3169	2508	2353	1990	2078	3037	1948	1908	1902	1920
851320.GLE1	315	286	432	296	273	203	321	284	296	265	75	256	143	242	226	369	242	438	227	82	86	92	164	314	253	271	382	283	292	407	409	204	316	230	266	404	379	252	221	353	339	271	374	286	388	325	235	252	233
851321.None	73	100	133	86	60	59	90	175	232	315	128	198	189	161	170	208	42	97	77	67	79	89	75	139	107	47	62	60	129	121	168	87	177	117	67	102	93	45	42	64	122	87	110	90	80	89	114	146	129
851322.HEM3	332	342	422	401	384	417	569	200	236	262	44	262	93	306	321	440	231	634	333	23	18	37	242	412	268	321	431	345	419	507	599	216	343	264	334	449	370	467	264	623	542	400	506	161	253	213	180	178	198
851323.RTN2	52	48	54	68	21	12	27	98	84	99	20	152	26	76	83	118	25	60	32	12	8	7	25	58	36	93	123	85	106	69	167	20	52	31	68	94	92	53	43	91	111	93	129	78	57	73	101	109	81
851324.ACK1	213	187	311	278	174	176	276	245	129	216	29	115	78	173	139	251	134	186	170	28	31	28	162	240	189	202	341	273	200	258	280	126	217	163	184	304	287	261	218	342	253	199	260	184	351	261	150	166	187
851325.MRPL11	376	458	530	345	544	547	665	473	409	370	62	582	140	211	211	298	596	930	700	43	39	49	267	460	371	152	217	194	270	269	348	250	434	308	223	282	292	262	273	313	386	380	379	387	509	460	319	365	299
851326.TRM8	601	659	839	713	586	593	718	650	512	524	269	468	424	349	321	444	701	1381	750	205	223	230	354	545	452	419	636	437	468	630	627	253	527	360	502	611	657	697	558	957	655	489	659	489	857	569	471	518	486
851327.MGT1	92	93	76	80	49	65	63	90	126	128	170	86	141	99	56	78	36	48	42	29	34	31	118	87	75	56	75	71	78	73	88	50	82	39	72	64	72	66	40	61	66	62	65	43	61	65	40	72	59
851328.None	36	22	46	28	33	25	44	57	56	60	26	56	26	40	47	51	17	28	30	26	40	28	23	54	22	32	55	26	72	53	77	25	29	29	31	43	33	19	27	25	22	27	30	34	35	27	26	42	33
851329.GGC1	629	610	801	780	701	747	965	940	1270	1230	373	925	581	657	604	838	497	1466	707	119	110	153	403	651	503	871	1351	1005	515	668	718	609	1104	782	591	831	792	650	828	789	596	451	647	1342	1545	1464	712	722	698
851330.ASF2	94	89	140	169	110	69	122	87	63	89	11	45	27	106	84	154	43	97	55	72	89	92	50	159	113	82	163	117	192	201	337	108	205	175	94	197	147	80	61	140	121	104	166	102	139	96	43	67	59
851332.SEC31	1001	815	1441	975	581	453	966	1208	1029	1091	227	952	329	828	817	1286	754	1816	1218	142	125	161	406	628	487	896	1475	1068	702	1252	1096	409	802	558	873	1358	1142	724	616	997	1063	808	1251	911	1065	1035	1131	1084	1073
851333.SNF3	72	65	105	114	86	62	92	133	155	138	34	189	59	48	73	104	124	337	149	28	23	30	20	58	28	72	106	114	39	107	81	53	73	62	77	100	98	93	47	119	118	88	139	51	131	80	134	135	142
851334.NUS1	294	305	407	309	278	291	362	419	634	593	525	622	660	272	281	377	232	394	257	309	334	345	364	533	465	210	256	221	481	350	583	273	540	379	254	348	293	221	217	271	263	207	297	230	277	251	490	496	482
851335.ARF1	4194	4702	4602	4571	5514	6077	5646	3966	4416	4476	5587	4322	5223	3737	3766	4326	3418	2037	2963	1046	1162	1310	6054	5958	4940	4158	4096	3583	4591	4395	5035	4320	5690	4101	3899	4533	4518	4663	4328	4917	4574	4423	4212	4446	5528	4205	3354	3443	3421
851336.RPL35A	10968	12889	13465	7016	14499	17611	17106	13406	13158	13720	16440	11650	17700	9147	8232	10577	10064	22420	10074	8522	8964	9854	13100	16272	14557	11318	11623	9653	8046	11407	9096	14820	22344	16338	12135	11730	14324	12430	10970	14254	12740	11802	11318	12584	15808	11608	10879	11433	10885
851337.UFD2	445	420	539	502	293	274	387	443	513	603	125	557	226	405	496	607	411	684	574	56	42	47	314	533	368	435	639	505	456	537	607	264	495	329	370	593	580	349	298	457	441	336	438	394	492	462	470	446	426
851338.RBS1	348	350	525	366	255	240	402	424	392	411	115	428	201	197	180	283	305	1094	513	161	155	160	201	370	303	295	463	346	238	448	353	188	326	231	294	362	415	372	235	486	421	305	385	279	385	351	336	347	332
851339.PPH22	334	349	459	330	255	240	390	533	546	614	136	365	232	345	333	450	298	503	395	48	59	76	256	283	228	249	320	293	311	372	480	194	322	220	313	415	383	252	275	312	310	276	331	306	368	337	343	357	353
851340.None	56	69	87	46	86	69	78	87	87	81	35	82	52	28	38	66	53	158	55	95	90	144	44	30	49	59	52	84	28	63	39	56	112	95	48	32	53	86	67	121	50	26	39	65	83	76	98	109	98
851342.VMA1	2654	2596	3843	3403	1963	1725	2893	3294	3745	4029	1746	3717	2329	2567	2542	3779	2355	4337	3091	1044	930	1079	1789	2244	1761	3154	4708	3543	2333	3839	3229	1754	2914	2109	3059	4828	3963	2930	2602	3816	3126	2604	3644	3066	4099	3707	3741	3946	3713
851344.RPL41A	16270	21914	20874	18886	16274	27615	18367	14848	24927	22189	56825	17558	35789	14389	9818	16901	14544	13850	12513	94317	93663	88204	20095	27299	24370	16150	18972	19901	19230	20892	26947	17781	30599	21493	18522	14659	19481	22053	12939	22320	14530	10460	14771	17630	23412	19045	22973	21913	21210
851345.None	47	22	38	34	39	23	38	91	98	106	28	89	35	16	18	36	81	112	81	145	176	211	10	35	19	27	29	19	22	24	34	18	30	25	24	23	36	19	20	25	26	39	28	46	21	39	82	91	82
851346.LYS20	755	711	1105	1297	369	376	477	129	146	109	22	188	45	264	273	452	82	134	104	47	41	38	363	470	425	450	660	532	203	1115	334	208	341	257	1178	884	1711	868	930	1175	914	857	1084	1236	1466	1525	197	148	159
851347.INH1	593	613	659	411	525	534	573	605	786	759	248	803	380	329	281	388	269	274	218	165	187	176	382	385	400	52	55	41	627	440	839	757	1103	851	212	263	237	131	464	116	452	444	424	892	648	745	262	248	235
851374.None	151	154	247	169	123	90	184	228	306	394	185	264	250	157	158	207	110	218	149	200	193	209	115	193	168	136	184	139	201	221	322	106	198	142	142	214	169	79	128	127	165	138	179	152	166	194	122	157	135
851375.PCL9	343	309	420	273	193	175	269	560	436	501	92	342	168	169	203	242	275	614	336	30	29	46	156	234	217	200	217	172	262	384	322	142	222	170	188	376	249	224	210	261	426	394	505	253	264	229	226	227	213
851376.DLD2	686	722	990	734	560	498	666	797	748	806	153	778	265	734	639	989	533	1167	760	176	179	189	602	725	679	439	635	537	580	794	824	412	729	540	593	1012	704	472	488	631	873	706	841	547	734	602	408	394	424
851377.None	126	97	132	87	136	145	124	119	160	151	134	174	186	89	73	96	116	85	95	188	216	253	107	143	114	65	82	62	129	75	186	78	116	84	80	98	85	85	82	93	113	107	94	96	125	75	168	202	179
851378.None	122	114	179	123	89	94	123	145	156	162	63	125	70	106	94	126	91	159	118	432	414	476	63	183	119	113	146	113	158	164	215	79	157	104	109	145	155	124	78	120	145	111	152	110	114	131	161	175	158
851379.AIR2	179	152	204	159	120	105	168	170	175	161	53	170	88	106	117	135	149	337	197	103	91	85	73	137	104	102	182	127	130	140	140	80	105	84	134	148	148	155	130	198	169	163	192	130	200	132	178	218	194
851380.DLD1	591	597	954	914	333	284	570	1398	1145	1245	256	1298	473	998	1017	1583	402	1340	605	1459	1505	1652	829	1115	947	467	851	636	902	1176	1451	675	1418	1008	776	1532	1259	879	847	1431	1240	999	1507	930	1136	1084	818	870	912
851381.PAR32	618	683	943	758	397	370	598	689	685	765	195	841	331	715	754	1109	339	1106	497	24	19	23	610	1079	857	676	963	834	684	1174	965	459	867	638	699	1138	894	464	431	636	631	528	692	446	604	544	446	446	410
851383.GLT1	1244	1081	1692	666	571	452	778	1165	1044	1185	212	765	394	1145	1056	1843	506	896	743	58	50	55	304	468	345	1066	1781	1455	645	1031	957	486	919	670	472	1170	753	555	707	649	1266	996	1409	1140	2099	1297	742	779	819
851384.UGA3	224	184	300	237	131	145	212	229	307	342	96	193	196	205	163	304	57	209	98	103	84	119	99	246	151	234	402	275	356	278	506	177	350	241	215	295	284	241	311	349	242	167	282	535	1007	653	191	155	154
851385.UGX2	18	14	14	20	9	18	15	52	39	42	13	52	24	25	16	26	16	13	10	14	20	19	6	6	4	6	10	9	10	4	4	6	13	10	7	8	15	8	4	10	5	21	17	14	5	24	24	23	37
851386.SFA1	869	796	1215	759	392	365	647	962	1161	1199	441	892	702	1008	870	1476	359	954	554	534	561	621	647	861	714	310	472	394	569	798	822	633	1314	984	597	849	847	606	839	848	920	840	1099	1082	1146	1531	597	613	596
851387.NRP1	717	585	911	667	473	442	677	697	597	523	125	506	288	343	294	558	581	1755	952	153	179	208	310	682	508	561	911	637	538	887	820	263	534	397	499	652	697	790	530	1078	658	568	779	505	990	605	507	527	468
851388.FAP7	425	432	562	470	418	391	531	388	524	441	308	700	462	342	343	467	564	1442	701	499	479	507	324	493	371	386	493	383	368	523	503	230	337	296	435	489	489	473	352	598	520	447	555	346	438	316	527	532	528
851389.CDC36	315	327	354	408	462	432	472	331	360	347	337	371	372	276	277	331	179	231	198	296	287	306	382	418	352	253	262	237	427	322	441	336	427	343	284	300	316	389	217	413	324	308	305	290	261	219	290	333	322
851391.CDC9	287	266	489	340	183	181	300	322	258	284	208	343	230	254	222	429	185	368	252	146	125	166	248	477	363	248	402	317	299	457	459	153	354	229	289	575	468	242	218	373	272	235	345	278	347	296	245	231	248
851392.ENT1	427	350	513	505	368	347	443	575	577	515	324	658	420	473	455	587	360	909	420	139	175	200	353	626	424	493	627	516	492	672	607	337	495	333	504	708	608	408	322	540	383	315	344	393	401	344	442	461	455
1466431.MHF2	58	120	111	198	275	348	318	57	91	67	71	101	88	72	70	81	62	164	61	32	33	43	486	443	389	48	83	49	79	173	92	108	146	110	99	74	114	166	102	199	75	75	64	82	66	78	97	92	77
851394.DHH1	163	172	206	206	193	160	197	674	436	493	42	331	118	177	152	231	249	267	343	21	20	12	64	115	90	120	153	115	155	338	192	70	138	90	147	212	143	145	169	203	210	189	201	216	293	230	470	466	384
851395.YDL159W-B	0	1	1	2	0	6	5	6	9	2	6	8	1	1	1	1	5	6	5	1	0	0	3	1	3	2	2	1	1	3	2	0	3	1	0	3	4	0	3	0	3	0	5	4	3	1	4	6	13
851396.STE7	136	138	179	134	107	101	145	185	203	195	77	212	119	115	104	145	144	225	162	158	154	125	53	125	89	120	209	154	163	181	216	88	131	117	115	152	143	113	98	153	173	142	136	120	119	133	160	198	199
851398.None	533	575	526	510	592	667	614	225	232	233	157	148	130	349	376	413	240	309	223	355	351	375	850	551	543	311	301	256	461	268	427	545	547	457	408	367	475	558	492	583	538	563	453	390	449	378	390	361	348
851399.CMR1	81	70	113	98	67	43	89	69	32	46	3	54	15	40	52	52	43	155	86	2	3	4	21	64	41	69	96	60	48	96	45	28	67	27	60	135	81	73	40	86	70	59	90	51	72	59	44	48	85
851400.CLB3	298	263	375	273	204	172	246	333	279	255	83	243	134	158	164	206	226	666	293	151	149	148	111	245	190	191	313	227	205	335	310	104	243	172	229	341	290	198	178	322	286	236	323	215	325	213	287	326	302
851401.MSH5	37	36	61	73	55	59	56	17	31	16	10	19	21	43	61	61	15	10	5	100	98	132	41	68	74	31	25	42	83	53	119	35	68	32	55	109	76	49	34	48	30	25	28	39	41	34	21	21	13
851403.SAS10	920	968	1273	898	677	704	977	983	593	655	181	447	292	542	526	744	1014	1794	1212	159	151	205	317	840	555	886	1186	933	764	1118	970	347	660	488	817	1085	1055	1367	886	1648	1065	880	1059	797	1552	868	588	585	633
851404.RPC53	681	711	1013	780	499	430	767	905	670	702	240	582	375	391	393	567	619	1938	1009	523	522	583	323	488	384	548	843	682	432	941	645	268	494	344	639	868	806	722	564	1029	800	654	883	562	1022	682	614	686	687
851406.ATG9	74	54	119	121	43	59	79	146	184	196	67	187	132	98	112	114	90	144	85	191	211	251	44	102	92	78	104	84	118	106	156	59	93	70	114	102	149	41	58	82	70	48	75	61	77	59	154	173	170
851407.NOP14	1011	863	1193	844	690	722	934	883	717	763	247	689	453	472	480	731	1036	2043	1386	543	644	655	344	823	598	735	913	795	811	1086	1101	370	630	451	751	1121	1003	1142	775	1446	1051	866	1107	581	1216	669	678	744	680
851408.RPN5	1035	1040	1394	1158	1081	1006	1422	1300	1288	1242	479	1590	701	1049	1039	1463	846	1738	1224	1293	1447	1549	798	1720	1202	1112	1470	1098	1408	1175	2006	668	1160	914	904	1232	1230	863	865	977	998	780	1026	1369	1341	1349	1340	1326	1423
851409.LDB17	160	163	207	171	149	139	157	103	270	221	347	264	202	188	177	231	114	123	91	337	171	218	189	217	183	146	170	135	143	133	207	174	256	181	178	186	184	140	147	147	142	141	113	178	153	134	220	255	229
851410.COP1	1300	1175	1722	1410	978	905	1430	1128	1194	1370	290	1069	488	1156	1156	1703	767	1397	1133	394	336	402	824	1329	1015	1346	1954	1432	993	1524	1266	649	1162	834	1210	1738	1625	1317	992	1716	1509	1326	1638	1051	1502	1310	1041	1105	1090
851411.None	372	319	553	290	164	164	255	532	539	552	170	505	297	297	282	478	246	664	362	101	107	123	242	259	263	229	341	268	258	450	442	166	344	276	259	423	365	236	180	380	314	220	313	294	303	341	254	272	236
851412.CCT4	1652	1668	2539	1962	1313	1250	2001	1575	1419	1440	241	1348	444	1442	1403	2133	1345	2353	1811	325	354	443	1089	1472	1186	1751	2489	1965	1509	2160	2062	789	1512	1033	1651	2234	2259	1785	1574	2419	1780	1559	2056	1631	2548	2013	1347	1448	1355
851413.CRD1	126	125	190	114	111	110	124	203	168	208	85	122	122	110	112	169	77	85	74	86	85	106	136	138	112	86	110	98	165	118	251	94	147	132	96	121	128	80	77	105	110	107	96	88	117	120	100	94	76
851414.BPL1	251	180	359	204	129	136	201	266	224	236	65	301	127	169	166	279	134	349	244	89	81	76	153	253	202	175	317	227	217	294	341	108	221	159	165	265	243	142	115	214	227	235	346	154	236	217	167	205	192
851415.RPO21	946	943	1511	1078	529	432	902	1226	1074	1230	52	1212	263	771	684	1133	1017	2057	1481	103	142	154	215	485	393	915	1631	1099	661	1412	1021	377	802	602	871	1118	1149	865	778	1440	1111	863	1320	922	1195	1035	1053	1117	1075
851416.SCM3	61	88	96	57	51	66	67	87	98	109	36	67	56	66	66	102	37	70	39	51	42	59	51	61	61	60	68	59	67	59	99	53	66	55	50	51	50	53	54	51	73	63	92	49	52	52	56	72	65
851417.RGT2	205	244	321	159	115	109	193	236	229	216	45	152	77	150	167	290	99	257	154	26	23	25	114	211	160	155	308	195	165	327	313	91	184	118	171	278	278	142	129	207	214	176	266	174	242	194	127	122	118
851418.ARF2	1272	1381	1372	1602	1281	1313	1413	1961	2434	2566	1728	2383	1917	1543	1568	1832	1092	1531	1248	1065	1182	1253	1740	1603	1431	1423	1581	1374	1493	1752	1647	1071	1470	1077	1617	1831	1884	1602	1400	1852	1461	1514	1339	1591	1583	1425	1706	1713	1690
851419.RPL35B	6526	7847	8403	8324	8461	10111	9894	8351	9134	7614	9431	4913	9689	5023	4808	5913	5954	10252	5856	1270	1386	1607	7765	9963	8513	6307	6779	5506	4142	6401	4636	8360	12366	9075	7182	7036	8272	7758	5964	8751	6926	6711	6452	7570	10288	6978	6149	6485	6385
851420.RDI1	549	585	665	710	704	651	809	528	556	587	531	525	575	596	604	801	271	415	302	200	190	202	735	1127	898	474	555	508	528	596	720	684	1054	794	612	777	726	490	468	610	487	416	534	589	579	519	396	409	436
851421.PPH21	691	629	733	648	491	444	615	512	665	696	472	621	551	670	710	837	325	652	434	423	461	517	649	642	550	561	701	562	713	787	932	516	793	595	618	837	808	669	549	795	693	562	644	677	735	681	469	491	476
851422.RPL41B	18205	23410	16860	19145	25247	44356	22473	10094	23147	13528	65145	19746	24165	13094	7070	10038	15323	7892	9603	23091	24711	27401	29589	35848	30613	12548	13173	12840	24468	13388	28568	29983	43048	32629	21393	11354	16749	28901	14673	17191	15719	10848	12079	21815	18166	14897	31561	29919	29000
851423.SRF1	220	222	232	233	147	136	212	153	192	194	107	192	140	259	245	298	128	254	157	259	281	302	114	219	139	170	235	164	283	256	351	252	375	270	199	277	226	181	125	215	178	152	153	149	174	176	211	189	242
851424.CDC53	398	455	544	704	287	232	406	490	556	530	158	758	268	651	597	946	358	677	451	456	471	504	515	795	723	628	964	672	726	664	1046	355	617	422	726	1036	931	580	471	687	686	538	681	551	605	585	567	584	542
851425.LYS21	618	550	788	384	441	440	588	159	181	135	99	117	101	610	584	760	65	101	71	20	25	29	251	367	279	476	705	540	293	646	406	203	356	262	518	543	604	498	559	590	783	751	896	703	630	650	200	212	236
851426.STF1	253	259	255	224	176	155	161	314	347	380	211	342	226	270	258	293	95	110	92	38	40	42	396	375	320	124	117	107	74	142	89	181	176	156	138	119	167	168	147	116	222	233	195	231	106	209	160	175	149
851427.RPP1B	11216	12045	9871	8898	13446	14509	11248	7588	10337	10128	11893	8742	12062	8062	8213	7909	8271	7355	7474	4649	4990	5427	10947	7625	7287	9130	8246	7270	5577	8825	5032	9756	11863	8550	10083	8354	8686	11657	8838	10341	11435	10414	8242	9200	7534	6923	15552	16656	16395
851428.None	149	121	178	166	115	109	155	186	116	121	24	105	63	81	98	152	147	348	174	22	22	16	99	148	150	82	119	102	120	182	141	101	183	126	105	165	156	161	119	186	146	136	160	158	235	146	86	131	103
851429.VCX1	814	669	1144	591	442	363	607	1332	1155	1398	230	465	512	467	471	717	372	664	464	48	48	59	480	638	586	631	1064	841	429	846	587	330	641	439	565	627	681	683	586	872	713	527	824	733	816	918	369	360	389
851430.PCL2	211	193	253	178	147	140	190	74	44	74	13	36	38	112	80	137	55	62	62	10	10	13	122	174	169	137	227	163	115	199	127	76	134	101	123	159	174	234	149	260	216	181	242	129	184	153	63	75	96
851431.CDC48	2470	2339	3480	2686	1401	1239	2182	3285	3760	4025	461	4395	1055	2740	2751	4013	2046	4675	2928	492	501	564	1611	1636	1549	2567	3881	2967	2341	2624	3142	1267	2247	1619	2241	3356	3046	1883	2128	2543	2347	1810	2597	2915	3487	3452	2706	2909	2777
851432.HNT1	1015	1067	1014	1193	1181	1428	1169	727	963	1011	811	923	922	997	1093	1114	582	522	549	796	853	934	1243	1015	904	916	1017	776	1731	1233	1988	1347	1928	1501	786	925	896	806	729	954	1026	1024	932	730	684	612	731	817	780
851433.None	150	133	182	461	83	90	122	242	399	381	96	815	139	577	598	888	123	254	146	166	167	200	681	919	700	301	490	418	767	799	1055	556	996	748	258	446	383	365	186	497	326	271	355	100	85	101	359	414	399
851434.SNA4	197	155	227	197	129	98	165	215	272	255	128	205	191	172	173	219	89	141	105	23	19	22	146	189	127	164	257	164	140	253	234	149	225	176	169	236	242	167	118	220	164	140	174	88	144	98	118	128	121
851435.UBP1	765	694	1058	673	541	454	691	978	767	856	275	802	416	510	488	699	741	1663	982	229	249	261	319	719	458	555	897	668	517	707	700	319	632	422	635	929	782	774	616	947	897	665	856	684	1001	786	690	682	659
851436.None	262	301	316	698	828	954	928	482	538	508	724	460	725	328	320	452	283	295	328	327	361	406	681	808	674	332	384	306	577	536	677	568	878	672	431	437	549	709	516	752	467	502	417	425	755	476	357	306	358
851437.YFH1	440	372	380	281	282	354	346	212	358	263	186	351	274	253	259	331	212	378	249	143	122	156	336	422	365	192	342	217	333	362	446	269	404	316	186	300	249	265	340	312	298	294	293	384	509	435	321	322	350
851439.HEM25	109	133	150	125	117	124	125	112	117	151	68	136	98	153	114	144	74	118	65	96	92	101	139	130	114	76	87	76	147	88	150	91	166	116	100	121	113	62	71	83	155	127	126	108	59	61	130	99	93
851440.CYK3	474	488	647	362	313	252	376	528	479	510	61	450	147	403	387	545	475	999	567	303	298	334	170	336	271	330	423	351	309	556	423	199	287	220	273	425	361	383	305	516	609	538	622	348	339	416	379	356	340
851441.NUP84	402	370	537	418	336	279	440	416	507	479	298	649	466	322	323	453	498	959	591	3015	3117	3782	252	535	398	286	424	357	638	576	837	253	479	352	318	493	437	493	333	561	437	337	461	334	397	268	715	722	750
851442.IWR1	226	268	320	239	189	181	225	348	395	416	108	273	183	288	291	363	187	427	241	263	254	292	149	283	216	272	362	233	308	302	432	218	325	228	245	331	289	194	186	228	253	222	186	217	227	236	308	321	288
851444.None	1	1	2	10	2	0	1	4	10	8	5	3	5	5	4	3	0	0	3	4	0	2	3	3	0	0	3	3	4	2	7	1	2	0	2	1	4	5	3	0	0	0	0	1	2	3	3	5	2
851445.ATG20	142	132	190	199	122	145	166	224	333	384	109	314	227	236	223	303	76	145	108	80	82	80	150	368	236	151	239	167	272	258	407	197	335	242	150	291	220	115	75	151	113	112	142	135	104	170	236	217	224
851446.TRM3	714	673	969	626	464	402	618	586	537	617	215	362	313	422	405	700	332	743	495	1873	2070	2302	242	550	401	645	875	676	494	734	699	270	464	347	558	740	783	783	510	999	694	542	756	414	740	480	407	412	412
851447.RRP42	657	637	844	620	535	525	624	578	453	503	197	377	307	327	309	463	441	683	590	248	238	296	405	544	490	429	686	490	401	638	620	278	563	401	392	517	593	642	472	987	622	554	673	445	723	581	377	494	495
851448.TMA17	257	224	343	386	166	163	215	177	313	260	89	677	166	490	471	654	204	412	210	31	62	39	262	356	335	169	253	198	425	284	529	365	615	471	229	451	242	122	222	167	488	431	455	349	342	406	455	475	499
851449.None	88	83	141	93	75	50	90	68	56	54	2	76	23	42	65	96	30	106	55	6	8	8	30	65	51	55	101	88	73	137	136	32	109	73	46	110	92	78	72	115	73	55	89	81	89	86	53	48	48
851450.KIN28	223	254	360	267	195	176	295	258	291	231	111	246	149	140	160	229	167	344	211	228	257	256	217	216	227	162	272	233	190	345	256	154	242	224	174	197	251	212	175	295	200	177	230	173	258	197	172	208	218
851451.MSS2	125	130	184	150	204	217	239	123	120	143	44	126	74	123	124	154	90	120	115	75	90	91	180	291	214	91	125	104	158	128	181	155	216	201	72	109	119	109	88	124	101	83	109	135	108	139	91	79	78
851452.PHO2	132	134	249	118	88	95	143	253	193	231	52	207	80	145	111	189	120	163	161	96	87	110	74	182	109	110	161	122	105	152	162	69	118	131	138	194	172	159	115	163	177	139	186	101	123	128	187	191	196
851453.NSE4	74	62	77	57	39	49	54	94	97	81	42	83	68	23	25	38	84	171	124	32	34	47	30	71	37	32	56	27	46	61	57	29	51	35	42	68	65	48	38	54	46	41	68	40	49	39	102	116	82
851454.QRI7	89	65	124	83	89	96	125	106	156	163	59	158	110	75	56	73	69	161	112	82	109	111	90	109	59	38	61	42	66	90	88	93	115	82	60	84	67	54	60	56	79	61	72	67	80	68	87	84	91
851455.QRI1	374	331	452	330	200	231	343	393	406	390	148	341	201	309	258	406	271	581	338	356	376	421	224	392	317	325	426	339	328	373	382	190	347	243	311	482	423	353	316	382	327	295	360	341	369	404	421	500	468
851456.POL3	239	254	313	234	150	137	225	335	257	247	60	279	140	191	139	244	229	556	323	176	157	201	141	245	159	228	317	236	158	213	264	117	206	138	262	310	274	209	166	349	289	228	261	191	265	192	240	233	236
851457.DUN1	113	155	200	185	156	172	232	236	186	199	100	326	189	110	93	152	169	336	199	67	74	59	131	277	193	132	167	115	170	158	234	111	172	120	147	187	162	169	101	200	150	118	155	102	145	91	212	215	212
851458.GET3	1079	1135	1427	1211	1026	1073	1308	1297	1677	1628	1010	1565	1222	1054	1115	1428	890	1504	1100	604	550	622	951	1498	1157	921	1216	984	1215	1143	1652	817	1414	957	951	1176	1228	936	991	1216	1085	987	1171	1144	1400	1252	1168	1188	1212
851459.BUG1	501	546	681	542	370	438	510	325	282	309	77	249	130	459	451	700	320	497	379	30	40	41	302	580	410	548	665	584	515	546	564	241	431	325	545	669	647	465	403	628	572	497	506	496	669	532	390	421	427
851460.SNU23	111	119	144	100	93	92	85	139	108	134	101	78	132	57	87	86	71	92	68	3	3	8	92	157	102	79	85	61	135	88	158	75	83	54	63	66	87	61	75	63	89	60	61	87	70	83	60	59	63
851461.RPN6	1163	1224	1748	1221	774	824	1203	1107	1359	1237	560	1411	773	1098	1120	1590	632	1177	876	659	732	822	816	1303	1037	1050	1577	1210	1281	1292	1701	542	1046	782	1000	1274	1412	915	988	1231	1141	886	1197	1387	1405	1440	1221	1311	1269
851462.PMT1	1385	1314	2089	1606	917	833	1450	1604	1748	1951	1117	1663	1293	1376	1273	2019	664	1888	1027	188	185	198	1263	1634	1441	1328	2057	1478	1046	1781	1386	808	1445	985	1273	2013	1920	1193	1049	1631	1308	1014	1534	1236	1826	1513	1174	1258	1157
851464.PMT5	237	200	328	223	124	99	216	217	221	268	135	309	236	147	170	260	152	368	225	63	58	60	89	236	155	255	375	259	166	248	315	151	344	202	184	275	274	211	153	304	155	159	186	200	290	215	296	310	271
851466.SRP14	622	677	590	505	648	766	638	546	555	487	549	621	539	402	387	392	447	608	397	155	161	186	524	578	454	432	405	386	450	429	487	470	584	412	506	495	471	570	487	566	578	503	421	511	549	460	514	437	446
851467.UBX3	142	144	186	140	129	118	128	209	322	317	171	381	277	165	198	204	111	223	144	61	51	36	34	84	66	84	115	105	237	150	279	142	259	171	122	217	161	90	94	148	131	93	121	159	145	130	227	219	225
851468.RAM1	146	136	169	157	124	119	183	196	251	261	75	265	175	85	112	122	161	315	208	115	115	124	103	117	133	121	159	150	131	153	199	87	181	132	122	174	143	102	90	112	111	110	122	113	116	112	236	292	218
851469.NUR1	103	128	162	118	126	109	182	80	108	98	73	87	109	68	81	136	43	40	37	14	9	13	80	142	122	106	148	130	129	124	198	105	200	151	87	134	144	99	78	112	105	71	88	101	119	109	61	63	71
851470.ASM4	436	452	635	434	226	257	372	364	312	347	76	219	131	299	331	444	304	489	410	46	39	49	164	367	252	339	516	437	349	426	452	164	338	229	365	496	471	401	337	569	472	398	549	309	551	413	327	340	304
851471.LUC7	95	43	81	102	50	38	65	92	78	70	6	69	16	70	65	95	84	191	116	5	3	5	40	90	57	32	74	73	49	82	70	40	100	72	48	77	59	52	57	86	84	54	81	65	65	71	89	93	94
851472.None	814	771	1009	718	548	659	774	930	1182	1318	515	1247	750	734	794	939	780	2233	999	212	268	263	520	586	539	361	531	380	785	955	993	528	848	658	503	690	588	470	520	664	919	768	847	572	645	595	961	924	916
851473.None	249	266	258	274	413	548	427	364	426	435	606	286	395	327	249	332	208	40	139	621	669	648	292	345	299	222	214	166	443	254	516	263	317	253	247	275	255	293	264	253	225	164	175	342	345	258	371	394	331
851474.NDE2	8	19	16	18	8	2	13	108	99	107	68	120	81	7	13	22	26	71	38	51	49	60	6	8	9	6	19	6	18	9	25	6	18	4	4	9	8	10	9	10	3	7	15	3	10	15	73	64	76
851475.SUB2	2045	2174	2351	2082	1775	1906	2186	2023	2223	2489	1317	1846	1462	1690	1780	2287	2008	1734	2030	609	610	767	1988	2434	1876	2379	2568	2022	2487	2224	2757	1417	2082	1435	1972	2557	2246	2071	1994	2307	2502	2220	2405	2232	2742	2047	1763	1837	1802
851476.RPS16B	10687	11475	13385	11675	11950	13410	14413	10820	12056	12016	12585	11031	14050	6958	7214	9171	8177	14633	8436	2774	2904	3242	10968	9454	9899	9102	10649	8374	4129	11224	4934	9377	14714	10858	10031	10436	11910	11177	9700	12912	10991	9974	10387	10103	13343	10039	7891	8165	7933
851477.RPL13A	6298	6370	7314	6623	6629	6984	7571	4670	5707	5484	3428	5560	4508	4810	4965	6103	6314	9372	6864	1972	2142	2246	4402	5826	5100	6151	7290	5792	2847	7029	3433	5467	7982	5825	6064	7699	7215	6412	5879	7435	6711	6370	6313	7011	8795	6596	5875	6325	5928
851478.RPP1A	16105	17362	13865	16477	28179	28779	22320	16247	23445	22721	38505	20978	34336	13082	14232	13518	14404	3752	11336	47182	48420	54236	27953	16347	15371	13602	10622	9714	24473	14886	21994	30678	31969	23334	16037	13385	13953	19555	20844	18168	16465	17397	12106	20642	19364	15652	29152	30767	29637
851479.THI3	241	221	346	279	184	173	234	554	421	576	166	367	291	295	259	386	190	287	248	113	92	117	134	199	186	202	346	257	183	251	297	194	372	266	224	283	282	231	247	285	244	222	251	419	606	500	267	246	271
851480.MRK1	90	110	88	96	107	63	101	49	58	45	17	162	40	82	69	104	37	53	70	136	131	140	91	80	68	61	104	79	97	88	124	125	156	157	58	65	100	90	79	82	76	75	81	90	100	102	211	276	214
851481.MDH3	816	820	1171	999	771	752	1081	496	534	635	85	818	201	775	822	1141	269	879	449	114	80	110	663	797	704	630	927	680	753	1114	1098	599	1000	802	796	1116	962	699	763	959	751	594	844	1064	1377	1218	458	441	467
851482.VAM6	286	263	334	258	159	129	208	188	173	169	54	162	91	238	204	392	124	236	167	122	125	103	67	204	188	222	311	255	166	242	230	151	265	217	242	325	267	188	155	255	199	164	205	226	225	246	140	153	146
851483.RXT3	268	291	320	244	222	203	281	211	128	127	29	142	68	231	189	274	125	322	181	26	28	27	215	310	238	180	278	211	185	203	255	149	266	198	240	190	269	212	246	250	209	202	202	299	301	250	189	188	188
851484.RPL31A	14655	17490	13821	14432	19815	24115	17616	13035	14516	13817	22894	12930	18311	11759	11520	11728	12589	14773	9733	2476	2634	2888	16674	16664	12864	14634	12068	10847	9110	15426	8008	19259	21147	14965	15397	12071	14102	16043	15245	14759	16383	15124	12326	16578	17731	12949	10403	10773	10609
851485.BRE1	599	628	760	603	523	488	627	558	494	492	207	421	301	411	390	480	313	706	533	1466	1476	1538	351	797	534	468	609	528	586	523	757	288	539	362	496	543	599	597	507	679	677	509	597	533	815	503	567	563	579
851486.AHK1	331	351	464	309	244	240	305	362	315	358	118	328	223	261	260	344	225	509	355	246	239	273	156	342	213	355	466	365	279	306	369	160	299	226	286	375	349	313	261	359	331	323	394	251	351	320	261	300	279
851487.YET3	837	797	806	733	601	647	649	707	1121	1158	806	931	829	1303	1184	1401	443	374	436	637	621	727	896	750	669	770	768	683	1443	717	1569	1110	1490	1106	748	836	811	688	583	657	580	585	515	594	459	548	958	968	936
851488.BDF2	1533	1431	1942	1433	1014	1117	1495	1452	2100	2353	296	1980	724	2218	2346	3033	1197	2238	1518	84	80	76	812	2082	1275	2107	2842	2187	1697	1394	2185	1079	1837	1328	1525	2040	1812	1399	946	1690	1217	1072	1204	945	969	1076	1050	1204	1181
851491.CBS1	108	94	129	103	75	69	69	137	168	155	83	140	114	65	63	73	91	146	108	36	37	41	86	129	120	57	89	63	95	64	130	69	121	84	58	68	62	79	65	63	113	110	107	89	73	80	98	104	109
851492.COX9	1114	1201	1042	708	1022	1197	860	1040	1307	1328	630	617	727	868	754	910	634	351	502	114	111	137	1213	882	810	462	389	395	1416	736	1430	1672	1865	1401	591	653	488	725	899	604	1118	867	816	1558	1186	1105	589	587	567
851493.IDP1	529	512	727	625	430	452	636	581	799	770	217	836	334	683	675	899	406	687	411	70	126	130	474	711	493	434	641	468	876	1038	1170	816	1292	953	511	785	677	428	430	567	592	570	645	433	510	461	490	587	499
851494.PEX19	335	302	334	210	223	221	275	180	195	219	81	260	136	243	201	293	156	425	202	218	248	246	154	333	238	250	330	226	219	270	270	160	225	180	278	287	278	216	243	263	231	217	279	264	304	272	244	198	210
851495.UBC9	395	409	484	349	358	433	412	354	430	456	325	364	429	267	260	307	362	502	329	116	113	134	329	359	286	329	404	341	308	339	334	243	364	265	336	311	346	342	282	393	438	460	419	331	358	368	401	391	347
851497.SYO1	859	793	989	797	698	656	801	789	642	604	208	589	370	412	371	578	922	1537	1328	1448	1403	1607	288	613	432	593	657	599	543	866	737	312	385	269	652	773	838	923	646	1208	1026	877	955	580	1190	651	846	794	779
851498.RPS29B	7139	6607	4767	5195	8477	10024	5974	4865	5267	6212	10118	4328	8160	5558	4715	4407	4257	616	2929	2190	2289	2455	7074	6144	5099	5120	4190	4204	3926	4993	3431	6855	7977	5334	6869	4583	4642	8011	6408	6065	7085	6161	4631	7041	5865	4814	4560	5162	5010
851499.TSR1	1121	1104	1699	998	744	611	1054	1064	810	774	187	690	266	515	519	836	1216	3134	1719	1274	1205	1413	371	695	514	820	1305	961	516	1189	791	380	702	557	791	1175	1233	1332	884	1880	1119	866	1319	742	1473	831	770	810	730
851500.RAD59	45	40	44	61	41	30	48	46	22	38	43	46	38	44	32	69	22	49	28	8	3	8	60	84	78	76	88	48	57	47	88	47	75	63	68	58	63	64	57	55	64	48	46	49	69	51	37	39	48
851501.USO1	425	337	498	341	187	174	271	371	409	397	121	354	181	315	265	433	222	450	347	64	87	73	116	371	229	316	436	351	250	334	335	154	276	257	328	440	370	286	223	298	367	300	380	300	321	306	356	381	298
851502.None	65	82	100	110	46	58	62	97	100	136	26	88	69	101	108	117	53	146	74	68	58	90	63	45	49	53	83	60	41	102	53	72	79	71	38	61	53	56	47	76	54	49	67	61	67	56	81	90	84
851503.MBP1	281	241	332	203	131	122	181	147	126	133	14	158	43	179	168	243	125	271	204	55	60	51	79	237	165	172	257	203	176	220	220	101	150	113	187	266	202	215	186	214	276	196	269	170	240	202	136	166	177
851504.PSA1	6253	6366	7643	5688	5273	5361	6509	6235	7087	7238	4689	7059	6217	5617	5940	7411	5050	6321	5594	1025	1048	1147	5357	5801	4925	4888	5978	4750	4862	5700	6257	3686	5571	4221	4700	6713	5562	7367	6812	8326	6303	5625	6134	7743	9705	7421	7368	7618	7333
851506.MCH1	151	167	260	156	122	111	167	105	157	150	110	107	119	107	139	169	65	109	72	48	39	45	58	64	79	156	212	171	121	169	176	87	134	116	146	199	175	139	101	162	182	170	181	111	151	115	121	114	123
851507.PBP4	530	546	605	541	558	625	586	413	472	457	179	308	189	547	419	540	386	530	368	136	140	155	481	612	441	455	580	457	480	422	476	436	635	388	410	490	463	505	399	438	646	553	567	493	506	491	405	395	430
851508.SLC1	614	538	711	637	628	610	693	1383	1503	1615	2081	1366	2311	437	408	557	499	1163	602	203	203	256	486	662	501	437	564	462	460	570	556	341	641	491	574	603	574	452	405	527	564	464	580	547	704	542	694	728	720
851509.LHP1	1418	1451	1657	1473	1335	1397	1611	1414	1290	1231	1101	1251	1225	782	845	998	1395	1387	1529	384	401	472	975	1077	890	1070	1315	1132	1183	1249	1351	743	1163	785	1353	1610	1663	1775	1267	2090	1661	1414	1549	1050	1961	1123	1049	1093	1003
851511.KNH1	63	55	74	46	23	22	31	60	162	173	34	107	79	46	66	72	57	180	100	25	31	36	22	26	13	11	12	8	31	14	27	28	58	23	20	20	12	62	33	71	93	92	82	26	31	34	46	49	32
851512.STP4	224	213	258	184	335	240	404	378	789	860	82	400	231	244	241	340	75	220	117	19	30	24	82	156	110	88	116	81	96	188	96	273	423	357	81	71	72	162	307	259	236	171	233	457	393	530	175	184	185
851513.SIT4	560	588	1149	918	517	491	877	956	742	763	63	702	211	592	601	1012	671	1882	1059	21	17	26	408	633	548	520	970	730	429	1108	741	373	883	598	674	1142	1055	730	613	1213	871	731	1176	633	1265	858	658	657	614
851514.NPC2	1084	1069	1284	729	722	616	941	512	654	656	470	715	606	617	522	802	295	638	338	41	40	49	424	582	479	550	785	565	548	1061	767	315	637	439	697	759	777	916	677	951	937	806	750	830	928	837	382	407	401
851515.MRP10	371	363	428	394	492	514	528	265	318	285	153	370	197	319	320	412	281	338	285	93	109	96	413	525	420	193	187	193	331	385	463	396	614	459	306	319	374	284	329	281	467	317	318	411	405	339	238	257	236
851516.FAD1	198	168	211	205	182	143	194	210	398	345	294	349	405	228	227	280	107	145	128	121	134	156	163	241	176	149	204	136	224	238	296	182	254	189	189	229	221	186	97	184	149	130	141	143	152	176	256	237	253
851517.MTF2	127	144	167	96	107	108	149	143	121	131	39	144	59	81	82	95	175	273	214	130	106	110	64	117	114	70	86	71	160	115	174	82	150	101	83	109	71	80	87	120	117	108	98	87	104	101	133	122	137
851518.PRP11	224	260	328	225	150	128	185	253	413	434	350	449	506	145	117	193	121	325	210	39	36	41	175	275	254	165	229	198	189	243	262	161	284	223	181	249	251	262	254	300	214	208	233	251	387	336	183	209	217
851520.SIR2	242	224	320	217	82	59	123	158	185	175	67	192	109	128	110	138	165	249	198	133	125	139	127	206	150	212	262	239	180	276	258	162	264	153	220	347	268	161	185	182	246	189	242	216	328	242	213	247	224
851521.NAT1	850	715	1101	861	623	580	818	887	866	964	194	852	315	818	851	1025	827	964	1035	201	202	258	418	687	534	853	917	777	682	901	881	485	767	559	838	1174	979	882	747	1063	942	740	848	930	1134	907	750	757	816
851522.PRM7	1312	1126	1575	231	122	93	128	2	28	3	12	27	16	397	399	562	414	527	529	30	19	18	371	676	444	3256	4438	3532	329	2249	453	283	405	263	353	143	362	723	1043	921	2431	1843	2186	1579	754	1744	219	247	230
851524.BSC1	339	310	446	55	48	28	54	3	23	9	6	16	3	88	86	145	230	195	298	5	3	6	145	314	221	1327	2215	1406	122	807	159	97	162	119	93	11	89	58	316	98	1040	729	863	612	317	652	96	100	112
851525.PUS9	314	317	459	375	317	319	441	246	223	269	125	290	197	264	240	406	258	727	353	94	122	132	249	447	320	263	381	351	332	383	446	287	474	353	310	465	388	418	306	531	317	315	394	380	535	399	270	279	272
851527.GPR1	325	258	449	285	216	192	253	233	225	290	72	113	99	265	245	389	126	216	169	83	94	81	126	348	219	261	379	293	245	287	337	168	273	211	210	290	271	292	262	348	318	255	319	345	420	377	116	134	162
851529.SLM3	144	174	299	156	107	110	175	279	262	300	62	417	122	100	86	156	260	1053	468	114	106	118	78	109	125	109	176	142	108	226	205	104	225	157	112	151	156	144	107	202	172	150	212	128	209	126	260	267	284
851530.DBP10	910	831	1177	746	636	538	782	743	660	686	145	584	246	449	492	579	902	1610	1200	288	271	305	278	606	434	754	983	699	540	931	683	295	454	412	699	1087	865	1070	782	1351	1078	901	1138	600	1318	666	623	573	568
851531.PRP9	234	266	290	261	169	138	215	170	181	210	89	177	112	141	183	227	137	305	151	357	288	379	118	220	162	189	260	194	229	268	255	128	178	160	257	250	254	208	165	245	244	236	254	200	316	219	174	189	171
851532.ARP2	1025	991	1489	1559	781	707	1251	1258	1431	1449	594	1692	870	1360	1287	2117	814	1204	962	175	153	174	938	1588	1240	1279	1966	1514	1150	1952	1831	891	1728	1193	1285	2100	1890	1181	943	1702	1040	881	1328	978	1397	1195	1279	1185	1199
851533.MPS1	241	211	272	163	103	105	137	208	163	149	82	153	109	145	134	165	147	214	167	87	105	102	86	196	108	164	240	167	181	188	214	74	107	102	132	200	167	205	157	284	200	176	233	156	210	181	201	223	182
851535.MRX9	132	161	173	191	144	149	151	98	119	141	87	190	126	333	286	343	59	96	82	43	51	63	148	284	212	162	219	174	165	188	210	181	294	198	179	305	199	137	114	133	137	145	142	154	147	159	118	119	110
851536.RTK1	214	169	274	209	182	153	219	274	256	257	152	295	160	216	186	256	136	292	165	216	137	166	312	504	401	148	228	194	235	247	328	161	256	213	153	237	205	171	146	176	319	224	314	212	214	199	226	251	246
851537.DIA3	21	17	15	19	5	7	8	0	2	0	0	2	0	12	12	11	3	4	1	5	4	5	11	3	2	7	7	12	12	15	18	16	29	24	9	19	21	7	6	16	4	9	6	6	13	13	5	3	2
13393611.None	0	0	0	0	0	0	0	0	0	0	0	0	0	0	0	0	0	0	0	0	0	0	0	0	0	0	0	0	1	0	0	0	0	0	0	0	0	0	0	0	0	1	0	0	0	0	0	0	0
851539.GPD1	979	876	1251	892	416	477	771	1764	2304	2360	554	2411	833	1222	1276	1798	317	699	393	90	88	72	878	1388	1137	450	561	484	829	974	1088	470	955	658	712	728	876	790	686	897	2525	2385	2678	836	611	1070	3699	3774	3706
851541.GPM2	40	56	67	62	31	27	34	224	282	288	189	392	259	48	34	60	141	154	168	43	27	39	249	375	312	30	48	37	73	82	99	56	92	70	61	23	66	119	85	192	109	78	103	65	37	52	434	478	420
851542.RPN4	273	232	340	268	160	153	243	202	263	294	56	321	127	171	185	246	199	399	270	103	82	96	124	302	204	378	484	425	504	197	732	174	351	247	188	239	238	223	183	302	303	257	276	194	201	255	352	406	361
851543.OSH2	321	306	496	370	249	188	328	375	513	526	198	698	296	306	315	476	263	834	419	539	601	592	294	499	397	340	514	394	342	415	543	174	290	237	315	414	456	224	228	295	333	264	338	360	395	502	501	494	506
851544.ERP3	248	283	258	225	286	307	321	378	345	368	496	363	514	158	142	148	96	235	169	168	185	219	290	307	302	144	159	134	232	224	248	302	385	287	155	214	204	165	195	164	168	155	154	245	226	221	202	216	189
851545.CDC7	112	123	166	133	112	112	143	151	127	106	72	139	82	132	128	184	116	258	131	91	103	121	64	173	128	103	171	122	86	137	158	89	178	103	90	142	116	108	99	146	142	147	133	97	127	124	148	166	155
851547.TSC13	1396	1330	1428	1093	1003	950	1037	1036	1102	1172	1037	861	1287	1203	1213	1423	613	585	680	227	223	243	978	829	747	1107	1157	1021	1505	1462	1584	1041	1284	967	1208	1588	1350	1273	1006	1366	1259	1201	1018	1072	1140	929	742	828	815
851548.NOP1	4529	4354	8547	6248	3342	3166	6221	6760	6187	6580	1350	5605	2559	3132	3018	5819	5256	24448	9304	1752	2004	2200	2201	3681	3249	4473	9104	6553	2943	7776	5191	2065	5304	3644	3993	5383	6854	6156	4205	9843	5946	4675	8192	4320	8783	6148	4881	4843	4778
851549.SLX5	199	170	313	208	133	142	172	187	165	199	64	198	83	177	156	227	138	303	169	411	466	474	95	217	168	165	318	249	219	327	311	119	217	172	186	297	279	172	130	304	215	165	258	144	231	201	168	223	208
851550.None	243	238	301	282	341	398	377	300	336	347	268	402	342	289	353	401	238	229	285	425	477	455	220	306	200	255	344	265	406	421	537	313	457	333	295	320	293	392	273	360	264	228	261	235	283	215	436	431	414
851551.GRX6	188	173	236	277	198	235	294	246	366	334	465	416	519	276	265	410	115	171	124	21	8	17	259	457	342	234	290	241	649	320	892	406	618	506	175	354	322	156	160	192	108	130	139	154	199	141	199	189	205
851553.None	101	77	61	92	84	90	54	0	0	0	0	0	0	162	133	156	1	0	0	0	0	0	146	229	153	138	120	93	368	114	438	164	200	145	117	107	102	75	64	66	68	66	56	62	39	67	0	0	0
851554.APC11	218	225	230	222	310	306	326	91	107	74	81	90	79	199	171	231	79	79	48	30	43	50	320	283	263	102	159	109	238	170	249	318	347	257	161	195	163	182	203	227	164	142	128	249	244	218	60	69	75
3799969.None	0	0	2	0	0	0	0	40	51	59	12	8	16	0	0	0	7	1	3	10	11	1	1	0	0	0	0	0	0	0	0	0	0	0	0	0	0	0	0	0	0	0	1	0	0	0	12	9	8
851557.RPT2	1431	1524	2052	1411	915	786	1305	1431	1607	1583	439	1868	810	1473	1357	1993	938	1881	1226	484	490	503	782	1391	1138	1433	2165	1681	1484	1663	2258	696	1265	937	1188	1669	1748	1140	1021	1442	1330	1035	1371	1577	1809	1777	1419	1487	1558
851558.PTC1	203	238	252	277	185	148	259	320	370	382	166	298	288	138	153	231	174	392	262	327	342	342	160	321	257	164	217	196	253	226	306	129	217	172	176	225	266	169	150	231	217	170	244	212	227	203	274	281	230
851559.MED2	244	259	330	289	206	210	273	226	200	168	69	130	85	184	177	266	144	243	211	143	143	160	122	319	235	199	288	225	175	285	298	127	248	191	210	315	284	212	175	234	289	248	305	207	343	239	174	195	169
851560.ATP16	1120	1220	1499	1049	1371	1587	1702	1558	2275	2366	1105	2378	1335	906	872	1236	867	2072	1147	493	461	446	1631	1829	1622	492	594	495	1592	1436	1929	1673	2622	1898	602	900	744	682	1036	886	1168	1051	1165	1401	1403	1376	1248	1152	1199
851561.MCD1	337	301	499	422	311	258	451	411	183	160	69	208	127	136	183	272	311	660	380	143	159	180	198	489	337	238	349	312	272	311	349	128	230	138	286	522	408	457	319	613	328	273	393	271	459	350	367	369	369
851562.NHP10	362	413	541	467	293	318	490	338	404	392	208	319	287	292	328	476	241	360	280	786	775	834	376	546	441	327	436	345	417	425	589	324	511	355	396	531	483	374	362	436	368	369	367	410	608	496	338	389	333
851563.RMD1	194	189	207	147	143	145	141	139	116	135	31	138	65	138	105	151	128	219	120	84	89	114	128	160	161	130	144	124	198	194	228	132	154	99	158	222	185	120	130	143	187	157	215	159	170	129	151	148	133
851564.NTH1	466	441	623	567	295	252	410	486	1016	1133	310	1014	547	843	780	1149	238	392	356	667	614	757	259	369	276	520	682	484	556	554	725	430	743	505	583	732	617	531	494	675	531	454	569	536	543	578	811	871	773
851565.YRB1	2928	3028	3052	2648	2900	3080	2940	2063	2223	2225	1804	1856	1995	2033	1982	2192	1706	1285	1693	483	512	518	2297	2630	2097	2366	2314	2027	2828	2281	3198	2242	2998	2183	2519	2653	2559	3392	3023	3401	3066	2672	2611	3070	3530	2689	1670	1768	1775
851566.RCR2	169	145	193	184	154	166	213	197	353	327	271	382	372	153	195	291	169	323	169	57	65	56	190	209	201	87	115	103	248	191	358	185	309	223	127	232	168	102	103	142	158	132	145	88	133	112	192	228	236
1466432.None	77	63	69	96	45	56	55	37	80	120	117	45	105	80	94	109	36	20	39	628	722	781	112	111	108	43	74	51	136	100	182	74	154	107	53	63	65	44	34	68	43	46	42	60	43	36	153	160	144
851567.RAD57	276	258	387	281	167	131	282	178	179	165	141	218	218	215	223	355	77	218	137	157	144	127	179	401	288	152	269	180	382	280	488	190	438	342	193	284	261	191	178	215	307	252	323	265	289	307	148	157	195
851568.MAF1	266	274	335	251	253	196	281	348	318	299	105	323	171	300	297	302	251	288	256	41	42	47	221	344	273	267	283	266	295	277	403	262	341	239	205	317	287	291	242	277	275	218	216	199	250	202	271	290	265
851569.SOK1	525	561	735	463	300	234	366	703	596	685	93	625	203	420	379	553	452	983	696	164	138	177	242	362	304	493	622	529	318	525	463	158	274	205	431	395	486	648	470	730	643	544	635	576	583	621	591	597	622
851570.TRP1	332	335	533	372	292	329	442	439	471	482	447	415	571	339	328	560	211	381	255	172	167	180	373	455	401	333	396	329	371	538	484	361	640	445	344	384	490	451	339	668	325	270	377	240	348	322	305	355	272
851572.GAL3	53	48	81	189	348	305	431	54	48	58	1	82	15	27	16	43	64	128	97	8	10	9	33	25	36	37	68	41	13	38	44	25	62	37	31	40	48	51	20	75	27	19	28	8	14	19	48	50	49
851573.None	2	1	10	27	41	49	73	0	0	0	0	0	0	2	6	10	0	0	0	0	2	0	8	12	6	12	7	9	6	10	11	2	18	13	5	12	4	11	8	19	5	12	5	2	2	4	0	0	2
851574.SNQ2	1489	1246	1878	1009	529	424	908	1468	1007	1134	140	823	329	690	673	990	922	2009	1508	89	82	84	221	473	295	2100	3134	2326	465	769	620	129	259	214	902	1120	1204	780	717	1076	1095	827	1212	969	1219	1064	934	1029	1077
851575.RPL4B	4521	4039	5986	1775	4024	3664	6136	10860	11257	12250	3302	9637	6998	3595	3914	5504	11494	22813	17512	3288	3781	4089	2370	2433	2331	6063	9411	7137	1304	5142	1923	2789	5927	4158	6723	7782	9332	5540	4587	7578	6951	5412	7357	5356	6233	5786	9152	9516	9263
851576.PSF1	200	187	192	185	234	215	202	168	238	194	232	214	234	137	128	106	119	88	90	547	593	605	223	256	180	136	138	134	241	135	205	143	173	155	140	163	161	143	100	146	151	141	146	155	154	157	217	261	231
851577.RAD61	103	104	125	91	79	74	108	99	84	77	18	93	49	65	64	95	93	69	91	47	55	56	73	152	112	88	126	78	68	69	110	66	114	71	89	85	97	64	61	80	85	72	79	82	88	87	112	125	125
4036073.HED1	2	0	4	11	8	4	5	13	10	12	18	5	20	3	2	3	6	8	4	6	3	2	1	4	1	3	6	5	10	0	2	2	2	4	2	1	2	0	3	3	2	3	3	2	5	2	14	7	13
851579.DAD1	213	222	213	214	292	387	305	254	401	367	685	374	561	162	175	175	162	195	140	232	231	266	421	434	411	184	175	157	378	272	402	371	449	311	149	123	199	169	221	226	171	162	160	262	245	199	326	399	375
851580.KCS1	456	404	549	424	268	251	403	487	433	421	107	381	222	318	281	487	433	789	540	280	250	322	154	421	283	378	535	420	394	566	608	204	343	263	320	518	525	385	321	574	495	434	512	410	540	407	492	489	503
851581.None	25	43	34	34	22	25	19	27	51	31	25	67	30	34	26	34	19	46	19	5	5	3	10	13	18	22	31	22	31	10	25	26	49	16	12	9	18	18	12	15	22	14	18	14	18	15	31	20	16
851582.GCV1	783	772	948	688	697	697	872	828	497	451	305	442	384	418	398	540	485	966	606	78	71	92	1032	1130	1025	859	1012	780	411	859	491	384	598	402	627	692	696	623	509	702	1022	757	1003	566	815	606	361	421	405
851583.DAS2	238	208	361	254	233	247	338	269	283	258	181	182	229	151	149	236	199	340	242	111	145	126	212	309	252	153	220	178	291	298	408	160	273	236	225	269	259	277	188	399	226	235	267	168	274	214	176	153	172
851584.FAL1	273	226	316	235	186	226	246	329	248	266	153	173	236	74	97	139	305	544	422	403	446	529	97	201	134	131	197	165	135	180	159	113	149	101	182	190	200	351	227	378	235	240	248	170	354	174	305	255	281
851585.ATG31	71	84	85	74	67	61	70	116	174	152	149	195	155	66	58	76	122	230	127	167	177	194	99	125	94	38	71	47	71	50	78	73	141	106	56	45	71	40	49	63	65	41	78	75	84	73	173	166	166
851587.SES1	2987	2977	3939	3243	2470	2476	3277	2445	2489	2477	1254	2377	1715	2420	2268	3151	2369	3155	2635	889	850	968	1839	2969	2256	2611	3407	2766	2485	2997	3180	1690	2929	2080	2975	3804	3533	3213	2794	4205	3298	2752	3155	3005	4198	3267	2279	2300	2291
851589.RPS11A	8270	8139	7410	6756	8986	9946	8278	7377	7434	7506	7833	6760	7095	5542	5672	5542	7785	4100	6442	1533	1645	1799	6680	6422	5468	6861	6866	5658	2620	6607	2706	7069	8459	6032	7364	7286	6646	8151	7148	7950	8497	7730	6029	7551	7788	6049	6570	7054	6787
851590.NSI1	341	316	475	351	245	242	325	255	212	241	89	256	113	300	326	401	286	661	382	36	38	52	132	371	265	264	443	343	223	372	297	221	339	238	310	405	429	333	263	417	345	325	369	288	421	349	258	265	272
851591.VPS54	219	240	300	265	192	194	266	365	296	297	69	304	146	255	242	350	320	382	380	288	268	313	138	364	212	241	303	223	267	242	329	166	250	239	207	315	264	236	150	307	250	233	316	225	276	242	325	388	359
851592.REG1	532	592	756	616	353	286	533	511	554	599	171	520	273	624	653	900	364	896	613	291	307	355	241	533	431	605	916	686	411	648	686	281	591	402	549	709	706	466	461	701	688	594	717	534	664	633	531	506	484
851593.None	37	33	34	25	24	26	27	50	13	32	1	9	6	17	28	27	29	26	38	0	0	3	8	19	19	25	48	38	24	25	22	28	33	17	28	51	36	17	26	29	44	32	33	30	44	18	31	25	37
851594.RAD28	47	62	89	97	70	58	97	61	73	81	16	95	36	93	65	82	87	206	118	55	50	43	46	102	66	38	52	44	103	89	112	75	158	98	53	73	74	40	41	72	94	76	94	65	95	67	55	62	59
851595.MIX14	84	117	110	82	110	162	138	246	305	307	197	286	232	123	101	113	119	122	118	52	36	63	200	180	163	24	35	19	209	70	188	263	329	274	55	49	51	29	109	37	111	95	78	172	176	140	96	118	135
851596.PST2	527	566	633	722	444	429	506	945	1266	1177	205	1641	328	664	647	733	969	1539	1233	64	57	67	658	531	539	577	671	565	594	814	800	496	691	481	671	834	708	687	588	670	639	560	538	618	574	599	1210	1278	1273
851597.MRH1	315	268	368	392	609	597	738	1865	1962	1729	517	2316	830	394	375	529	2191	3516	2944	51	46	74	113	221	96	113	152	118	484	1454	609	1833	2935	2287	124	203	138	132	920	204	243	228	272	1759	1963	1965	3552	3634	3569
851598.LYS14	228	236	358	235	200	203	290	227	234	224	94	228	150	228	179	280	200	355	298	170	155	210	162	308	221	191	279	202	267	321	414	158	319	187	198	346	327	239	254	298	215	219	290	304	361	297	233	246	268
851599.None	126	108	181	184	213	142	190	0	0	0	0	0	0	13	15	23	0	0	0	0	0	0	71	266	171	66	120	77	43	100	70	97	207	143	69	88	115	97	154	139	244	205	263	494	448	474	0	0	0
851600.None	0	0	0	0	0	0	0	0	0	0	0	0	0	0	0	0	0	0	0	0	0	0	0	0	0	0	0	0	0	0	0	0	0	0	0	0	0	0	0	0	0	0	0	0	0	0	0	0	0
851602.None	0	0	0	2	0	1	1	0	0	0	0	0	0	6	4	0	6	1	1	0	0	2	0	2	2	1	0	2	0	0	3	25	17	17	2	2	0	1	0	0	0	0	0	0	0	0	3	0	1
851604.None	56	52	40	344	14	34	21	48	111	115	35	148	49	262	252	277	67	9	42	13	7	15	327	237	181	491	338	361	168	83	153	187	151	119	117	69	69	288	139	222	77	96	64	38	16	20	50	75	56
851605.ARO3	1124	1021	1752	1248	1057	1003	1486	1746	2432	2650	1133	1753	1557	1141	1104	1688	1623	4403	2264	437	457	439	579	983	863	994	1581	1219	1117	1328	1723	1159	2194	1756	807	1282	1220	1007	1245	1388	1075	939	1265	1880	2308	2301	1766	1833	1839
851606.EHD3	236	246	300	188	263	228	261	324	260	257	57	338	84	197	197	273	328	424	354	1207	1324	1491	181	291	170	148	186	165	339	341	447	216	326	245	189	213	211	152	142	176	260	198	231	438	504	503	272	302	284
851607.KRS1	5210	5078	6828	4744	3353	2874	4033	3493	3180	3211	1024	3529	1487	4671	4784	6476	4730	9196	6005	2326	2463	2642	2296	3605	2698	5717	7830	6055	3632	5745	4836	3176	5085	3910	4537	6296	5750	5792	2549	7135	7002	5587	7242	2277	2694	2553	4417	4697	4490
851608.ENA5	329	288	496	204	261	237	340	290	343	276	106	476	193	190	185	272	208	447	290	86	100	113	267	326	288	575	899	677	346	385	476	280	504	341	233	307	324	338	125	398	366	299	370	18	22	15	163	159	177
851609.ENA2	82	61	120	0	63	30	35	69	65	56	107	250	145	1	1	4	58	69	56	29	29	34	72	99	80	166	193	149	8	3	12	0	0	3	67	43	70	19	5	15	12	13	17	0	0	0	35	37	34
851610.ENA1	1	9	10	130	44	66	69	125	59	57	19	172	29	51	81	143	83	227	129	26	16	20	32	57	42	183	287	226	445	678	764	183	285	236	61	85	65	152	72	145	477	316	497	44	48	50	56	53	51
851611.RSM10	351	340	384	364	536	574	546	519	538	548	142	762	236	237	172	286	517	713	627	71	79	76	455	545	471	210	268	221	365	305	409	398	497	408	211	259	285	239	305	275	410	374	361	416	412	444	292	272	291
851612.None	21	22	28	25	17	13	14	3	14	5	3	13	6	8	4	12	47	30	48	47	29	29	7	8	2	15	9	17	15	7	26	8	10	6	7	6	9	7	6	5	11	8	9	9	15	12	37	28	33
851613.NRG1	135	143	133	104	84	75	90	94	121	133	47	168	44	71	60	87	124	166	144	17	20	12	104	137	98	118	144	157	64	46	81	38	99	48	108	111	86	49	109	64	95	71	84	150	145	173	107	122	139
851614.HEM13	365	391	491	444	749	743	894	1631	864	992	518	1071	642	271	249	310	574	900	766	41	48	50	229	224	233	434	612	468	193	388	244	247	439	306	170	264	212	948	510	1154	654	526	710	439	1024	491	2754	2849	2734
851615.RPC11	480	534	496	536	548	593	593	408	462	376	348	399	398	347	319	447	378	393	443	56	58	87	653	886	737	413	424	354	818	501	963	635	938	668	460	479	478	681	496	739	433	454	428	381	560	366	292	302	300
851616.BAP3	956	898	1443	858	850	821	1311	762	1254	1078	431	1472	669	1033	983	1659	787	2486	1287	884	842	860	647	731	691	586	948	712	2165	1622	3348	1362	2719	1994	423	849	614	640	885	956	743	608	894	1393	1567	1693	1373	1432	1331
851617.HEM12	751	791	1230	865	721	664	1016	1211	1306	1294	442	1347	658	678	652	1072	794	1577	1165	1259	1239	1592	777	992	868	569	924	732	1115	1300	1808	781	1626	1184	642	1018	904	691	917	1014	750	648	1003	1293	1670	1624	1268	1374	1175
851618.VMS1	358	343	609	374	222	244	332	441	504	483	351	457	452	294	283	410	278	561	381	116	148	180	129	414	298	347	485	374	353	409	501	146	351	198	293	482	422	369	228	495	396	305	407	233	343	316	351	345	313
851620.TPI1	17094	17406	20145	23383	22079	23009	25639	24176	30683	31227	29038	29046	36350	22400	22948	27476	17780	27533	21002	12181	12884	14408	22554	21502	19704	20260	23504	19177	14568	16310	17226	20369	29273	21800	20681	23513	23422	20817	22455	22653	13550	12419	13011	27922	30404	27269	27733	29116	28611
851621.DET1	348	361	447	358	332	322	450	380	402	406	204	272	290	304	323	408	137	402	202	84	80	63	330	494	410	238	299	215	476	453	726	292	491	389	279	403	362	234	237	349	377	336	390	284	374	342	209	174	264
851623.DBF4	460	474	689	490	263	286	464	364	236	251	35	189	112	232	272	404	182	313	312	291	327	397	141	371	293	369	570	450	252	486	379	191	427	334	383	623	542	415	308	604	581	462	632	342	581	404	284	322	299
851624.CDC34	548	554	915	659	378	360	576	755	642	721	183	468	328	390	431	660	416	769	517	23	19	28	184	539	440	435	741	551	331	552	507	232	499	368	438	653	665	571	465	791	621	545	772	529	837	596	406	467	352
851625.PST1	851	778	1065	831	882	855	1016	806	1028	885	198	1684	360	1983	2027	2575	772	1488	973	99	92	124	899	1133	936	649	886	689	1365	1796	1651	1023	1690	1322	513	977	664	991	867	1064	1689	1477	1577	1157	781	1330	1114	1265	1162
851626.EMC10	483	479	608	594	703	690	792	560	856	715	888	763	888	393	357	501	309	397	372	503	572	608	443	738	539	315	364	335	668	508	785	567	924	690	397	445	493	505	414	487	453	406	422	422	517	403	679	716	719
851627.YOS9	147	204	210	157	182	153	204	197	193	192	127	215	129	143	164	243	104	286	166	11	16	12	128	245	164	157	192	150	210	194	281	148	293	180	138	208	191	177	126	231	165	112	162	161	203	203	130	172	147
851628.TGL2	139	148	193	91	108	100	113	82	92	83	28	113	37	154	142	183	57	125	79	33	32	40	131	154	116	122	110	96	167	125	192	116	139	135	144	134	109	144	131	146	133	118	109	114	121	94	123	104	121
851631.UBC5	117	113	169	174	87	79	102	88	103	113	48	150	52	139	115	131	54	87	64	36	25	23	121	94	93	162	184	140	143	95	182	74	79	54	63	83	101	94	99	97	115	109	96	108	90	100	89	98	107
851632.MAK21	1425	1429	1995	1439	1063	913	1422	1485	1057	1020	212	893	427	855	811	1097	1498	2719	1871	103	100	101	447	1132	741	1210	1726	1343	932	1489	1513	636	1015	726	1230	1684	1669	1700	1173	2244	1650	1454	1666	1083	2075	1325	915	990	926
851633.None	267	275	406	224	174	149	265	208	295	318	66	390	95	271	212	323	273	639	370	313	340	387	273	317	289	222	297	220	297	322	392	208	401	274	180	238	231	230	202	220	230	184	249	238	277	257	242	288	261
851634.LCB2	1077	1005	1493	1376	939	983	1382	1064	1187	1200	900	1275	1183	1218	1325	1997	770	1418	1077	242	259	247	976	1942	1455	1115	1576	1305	1291	1662	1744	1226	2359	1700	1133	1826	1603	1151	1001	1538	1106	1028	1282	1146	1750	1328	878	938	993
851635.AIM7	372	349	401	452	412	475	447	403	629	580	490	657	516	435	423	464	304	590	326	86	110	96	408	515	446	307	387	296	383	445	441	534	659	464	450	550	492	369	318	398	405	362	327	524	439	457	391	373	349
851636.RPS13	11712	13653	15644	14977	12517	14603	18976	19273	18428	18193	19796	17179	21824	8250	8589	11261	11557	28336	14552	3489	3538	3835	10475	12056	11048	12203	13917	11485	5657	13266	6676	10530	17081	12201	11830	12509	15248	12122	10683	14282	13038	12513	13580	12119	16544	12406	12024	12053	11902
851637.RRG1	113	130	180	118	107	130	148	193	168	177	55	192	115	106	96	126	167	229	229	77	79	101	106	212	145	72	103	93	92	87	84	110	170	194	104	113	123	97	96	101	115	111	138	126	163	135	159	176	165
851638.RTR2	106	132	108	97	109	94	108	39	42	48	31	27	30	77	80	97	20	26	15	94	113	126	98	125	108	70	106	63	59	96	54	82	120	79	83	70	105	84	80	95	89	61	64	101	102	76	36	42	44
851639.OCA6	251	217	268	178	178	212	158	185	169	178	185	161	204	169	171	203	105	94	72	179	152	160	190	195	161	182	162	158	127	131	130	127	127	112	190	164	175	249	181	275	216	201	190	224	240	180	132	165	152
851640.DOS2	279	280	304	280	213	195	241	318	286	276	56	248	115	286	254	323	164	426	198	142	169	177	174	309	216	348	474	345	243	268	288	139	234	191	271	360	348	299	252	328	388	338	366	340	383	269	195	212	157
851641.DOA4	133	122	202	128	68	68	99	127	117	128	20	158	44	105	89	122	103	167	126	88	113	99	60	126	90	113	190	145	112	121	165	56	88	79	131	136	132	98	75	121	139	106	125	86	119	93	129	169	132
851642.FMP16	23	16	20	26	7	13	13	37	82	74	60	85	52	32	28	40	25	36	16	29	15	16	22	19	17	8	3	4	31	26	42	26	33	24	9	24	12	8	13	5	22	30	18	4	11	11	33	35	32
851643.PAA1	1307	1361	1525	1420	1513	1703	1800	852	937	1060	730	676	758	1178	1078	1397	666	552	609	96	125	140	1243	1974	1505	929	980	862	1297	966	1559	1036	1536	1182	1105	1069	1222	1292	1046	1361	1214	1154	1126	1162	1192	1013	570	616	635
851644.IPT1	918	880	1300	835	311	315	468	1115	1481	1535	515	1644	797	996	848	1224	1059	2475	1442	840	886	1008	722	1008	793	1582	2371	1671	909	1299	1239	768	1423	962	809	1248	1129	792	781	1128	1073	941	1213	936	1029	1231	1690	1718	1733
851645.SNF11	238	226	265	347	284	301	313	188	192	196	41	220	70	309	301	416	125	320	231	60	26	29	321	409	358	219	299	207	453	434	687	456	753	620	309	386	421	328	291	447	359	353	400	303	365	292	178	206	214
851646.TPS2	440	353	536	497	340	245	385	1007	1216	1541	138	1125	382	1105	1228	1711	189	323	293	89	58	88	330	474	385	477	713	513	413	553	601	590	1080	748	448	719	627	353	335	438	766	623	797	396	424	425	1253	1334	1221
851647.PPH3	215	185	274	193	198	187	232	179	174	149	103	147	126	72	62	92	145	175	118	51	44	62	134	273	204	116	162	174	155	202	240	84	136	90	102	119	144	182	114	221	172	158	214	109	183	119	138	117	125
851648.RAD55	74	84	82	77	46	37	70	137	76	112	17	76	40	61	74	75	63	101	82	22	29	30	14	37	26	49	70	42	50	56	75	47	85	51	49	116	76	39	59	65	108	84	112	67	75	48	68	70	74
851649.SED1	11588	10490	14087	5440	2056	1704	3451	10347	10386	11577	449	12965	2356	15025	15177	18953	7357	16412	10129	131	161	191	3610	4216	3706	9083	12041	9535	7492	14163	10022	8014	12495	9351	5838	8144	7052	8046	5137	9821	24220	22811	24341	4446	2671	4259	12882	13769	13400
851650.SHU2	68	48	72	73	96	113	107	29	51	48	41	69	32	35	41	47	43	30	42	76	88	80	57	92	64	36	49	36	93	66	130	46	75	52	33	51	48	48	45	44	38	36	39	65	57	57	70	67	65
851651.PET100	186	188	177	143	198	234	214	174	208	213	140	209	108	166	137	143	264	133	226	71	68	76	152	154	117	66	73	63	173	90	173	194	175	125	110	103	77	131	161	89	156	167	117	238	211	166	161	163	141
851652.TFB5	322	323	299	233	286	345	267	93	147	107	218	121	121	217	158	191	123	84	96	80	92	108	508	440	387	167	177	136	235	249	274	277	346	250	185	184	222	309	231	296	232	255	175	198	199	184	196	189	180
851653.VPS41	248	250	331	221	176	193	201	176	179	175	79	152	125	218	202	260	98	177	132	123	84	92	160	247	226	202	244	216	292	286	347	152	279	177	198	274	262	203	152	262	211	199	240	172	191	141	127	111	111
851654.PDC2	307	312	436	314	214	198	313	369	278	319	84	313	155	199	198	303	262	428	327	210	193	235	110	209	159	225	364	298	242	406	307	149	305	229	226	429	359	312	224	430	383	318	445	223	460	317	293	303	305
851655.STN1	126	121	162	166	161	150	194	203	263	265	221	299	302	103	102	155	100	97	123	177	154	148	111	237	159	83	105	114	261	155	344	164	258	178	128	181	111	125	120	167	140	131	151	128	145	144	190	198	152
851656.RRP8	707	654	806	601	561	554	705	806	774	757	489	580	494	472	338	490	745	1754	958	92	108	91	326	539	387	474	603	506	688	695	896	362	574	423	528	703	639	900	538	995	729	718	697	425	729	341	418	483	417
851657.TVP23	283	325	433	438	270	277	438	476	645	690	531	664	888	396	330	548	123	222	209	40	24	31	386	412	451	291	443	301	401	521	533	382	702	480	274	442	476	281	252	350	259	239	280	332	394	388	302	281	329
851658.AFR1	99	89	124	81	55	55	105	59	84	90	32	57	45	170	140	227	48	69	61	125	141	133	57	105	70	44	94	59	136	104	202	92	153	76	81	115	85	51	57	41	117	99	129	86	76	83	81	80	86
851659.SSS1	1988	2281	2065	1813	2139	2431	2124	1619	1868	1581	790	1839	1142	1790	1895	2061	1958	4466	1948	510	586	704	2220	2637	1980	1655	1483	1336	2328	1810	2413	1759	2300	1656	1736	1744	1877	1956	1815	1924	1956	1957	1666	1778	2143	1670	1449	1589	1581
851660.RRP1	860	768	876	744	883	891	961	590	483	527	213	416	302	374	351	482	852	1065	926	1055	1121	1250	519	761	610	578	599	534	814	764	790	362	537	411	746	729	756	1138	709	1241	852	708	786	550	940	462	583	611	612
851661.SLU7	169	168	189	138	135	128	135	118	95	148	30	90	47	134	137	181	90	156	109	36	40	44	113	232	148	175	215	149	129	180	179	97	140	114	157	240	192	157	129	170	199	144	209	183	241	214	104	119	91
851663.VTC5	371	320	482	390	287	325	477	317	267	259	151	199	201	179	189	232	136	184	162	106	121	135	261	502	333	242	337	277	209	347	317	71	106	80	331	310	381	427	321	521	396	373	503	301	475	346	148	147	128
851664.None	223	233	303	235	217	205	303	217	313	239	222	314	306	141	147	219	164	399	180	36	22	31	182	253	228	164	186	148	336	296	479	192	403	276	155	270	211	178	122	216	178	144	214	137	188	170	250	256	270
851665.RLI1	1394	1409	1933	1169	864	774	1120	1704	1208	1370	266	1112	541	801	801	1212	1360	2923	1944	127	118	110	712	948	780	1219	1491	1203	1042	1470	1345	878	1568	1093	1095	1837	1359	1629	1331	1964	1538	1488	1624	1261	2067	1432	1240	1361	1304
851666.UBC13	283	282	242	211	281	313	245	329	346	437	218	158	237	163	158	181	234	231	225	64	79	81	151	153	122	254	240	187	181	150	181	140	185	131	161	161	137	185	211	138	371	321	251	316	241	255	272	358	322
851667.DNF2	446	474	789	638	345	267	536	526	525	547	228	402	380	571	520	874	284	816	436	98	91	97	378	682	548	529	916	648	489	962	852	312	774	545	507	647	712	516	406	854	552	409	676	434	649	624	430	416	455
851670.GIS1	190	165	197	99	71	60	100	124	122	178	12	178	46	91	70	104	124	173	145	40	45	27	57	90	68	129	165	143	63	69	131	50	72	75	66	86	94	65	53	91	202	164	203	71	111	91	147	157	156
851671.MSH6	325	275	477	391	278	247	389	346	288	315	128	247	177	230	261	328	171	377	224	317	279	312	178	319	215	299	486	301	195	318	311	153	251	200	294	440	372	266	232	389	338	275	420	352	358	365	239	268	235
851672.GRX3	740	743	1000	1088	834	828	1070	640	734	718	460	655	548	760	682	1074	247	434	307	237	289	273	773	1014	932	774	862	689	1131	1042	1582	681	1189	898	756	991	960	805	649	1012	723	632	773	703	1045	795	448	439	450
851674.None	1	0	0	41	268	204	370	12	41	35	0	0	0	9	22	26	0	1	0	0	0	0	39	80	54	4	3	0	114	125	109	134	214	134	0	7	1	30	34	22	17	17	16	2	3	1	6	3	5
851675.None	0	0	0	0	0	0	0	0	0	0	0	0	0	0	0	0	0	0	0	0	0	0	0	0	0	0	0	0	0	0	0	0	0	0	0	0	0	0	0	0	0	0	0	0	0	0	0	0	0
851676.BMH2	1384	1132	1441	1117	725	972	1002	1100	1196	1270	231	1609	477	1138	991	1337	994	1471	1136	118	79	118	669	1473	963	1051	1481	1098	1058	1419	1400	665	1534	927	1066	1267	1178	929	1041	982	1539	1463	1671	1305	1150	1338	1185	1323	1408
851677.TVP15	227	263	283	247	301	300	315	257	436	441	392	441	481	207	194	231	118	224	135	105	127	155	440	422	386	158	207	174	499	292	598	177	306	216	183	189	221	138	169	159	164	161	146	250	243	237	416	373	426
851678.ARX1	1359	1320	1845	1325	1053	1002	1494	1182	851	851	267	862	449	757	721	990	1586	3971	2394	111	144	126	596	1235	850	1012	1313	1075	824	1501	1221	597	1022	707	1020	1336	1471	1630	1170	2166	1525	1267	1596	1039	2275	1287	929	938	947
851679.None	12	13	8	19	4	11	5	0	0	0	0	0	0	14	7	11	0	0	1	0	0	0	6	3	4	6	0	4	7	6	11	12	14	6	6	7	6	5	7	11	8	5	1	4	4	6	0	0	0
851680.STE5	42	45	53	97	147	172	200	42	59	47	15	66	21	38	40	56	55	101	72	70	68	71	196	335	248	28	44	38	66	49	92	23	28	29	36	47	60	38	34	67	51	36	56	40	42	46	64	67	58
851681.SPO71	83	71	131	84	31	47	65	84	75	75	10	112	24	58	72	127	93	133	103	45	60	85	31	94	55	93	139	87	97	113	152	45	81	56	54	90	88	55	54	90	106	92	139	63	75	67	106	122	119
851682.TMS1	236	235	313	258	234	224	316	243	290	314	217	285	217	234	263	432	157	245	187	92	83	73	222	229	209	204	288	234	306	333	501	241	397	302	240	318	287	222	210	233	191	185	214	196	317	225	220	219	211
851683.ARP10	12	10	10	11	7	5	7	16	40	29	17	71	17	3	5	5	32	77	36	47	44	49	7	12	8	6	10	12	11	7	20	11	13	16	4	10	5	7	9	5	3	13	5	24	22	19	94	73	75
851685.TMN2	87	91	108	123	108	112	129	152	181	157	109	166	129	112	95	150	88	154	132	79	99	73	100	122	119	69	119	89	124	112	205	105	138	100	82	104	119	65	69	78	102	104	114	83	98	82	163	181	127
851686.TRS85	128	159	171	137	124	112	159	207	193	188	49	260	88	110	117	157	183	315	237	120	117	144	92	153	125	88	164	136	138	145	222	101	176	106	127	209	175	139	103	178	199	153	161	125	150	135	230	286	232
851687.None	196	179	248	231	120	126	223	315	272	325	60	272	115	122	106	205	216	538	331	40	37	26	92	199	149	226	304	279	138	235	229	87	197	141	165	209	213	152	139	261	232	171	226	140	225	153	243	258	303
851688.FOB1	316	290	396	291	266	247	334	317	183	194	93	196	117	163	128	216	255	434	326	85	107	119	202	329	187	209	299	207	282	291	416	144	232	147	281	341	343	370	214	384	354	281	311	194	278	172	165	214	211
851690.ALT2	134	96	155	254	117	110	140	239	256	273	92	139	159	159	179	271	107	261	140	32	36	30	61	79	59	207	301	221	139	220	238	326	592	386	288	277	339	332	160	446	232	195	245	88	146	105	172	184	175
851691.PDS1	114	110	146	123	95	66	127	206	114	123	51	59	65	69	61	85	72	162	106	29	25	25	67	124	93	104	117	113	119	142	163	62	132	76	116	132	111	124	112	128	137	114	130	110	176	118	139	137	115
851693.None	1	0	1	1	0	0	1	0	0	0	0	0	0	0	1	3	0	0	0	0	0	4	0	4	0	0	0	0	1	2	2	0	3	3	0	0	1	0	0	0	2	1	0	2	0	0	0	0	0
851692.MRX14	369	386	355	331	619	602	568	465	501	458	304	479	386	194	224	216	504	375	474	143	164	192	507	354	324	172	177	105	334	200	356	444	473	366	201	154	193	225	328	222	343	328	254	454	377	348	606	626	531
851694.MRPL1	369	394	486	346	377	456	493	656	791	836	241	590	332	245	245	362	475	902	588	226	186	191	216	273	260	161	206	169	246	273	372	269	458	361	206	291	276	223	242	273	331	312	313	419	508	403	402	373	374
851695.TMA64	206	204	262	203	176	151	185	268	197	238	66	209	121	187	233	250	237	276	251	67	58	68	136	299	161	198	304	225	215	242	273	171	217	127	213	268	234	185	168	217	258	216	234	184	220	172	209	219	230
851696.APC4	102	88	120	112	85	92	132	117	112	129	59	96	75	84	69	113	93	95	95	188	208	229	84	126	111	88	99	125	160	89	220	90	131	95	100	102	93	100	64	113	106	78	98	90	88	85	93	133	119
851697.VBA4	803	810	1026	765	652	750	874	930	919	1025	748	700	895	464	439	591	681	1235	892	370	355	387	452	530	515	687	871	625	720	846	927	572	786	596	634	878	711	890	597	975	742	600	719	671	858	633	603	595	574
3799970.COX26	7	19	14	88	21	38	32	39	75	127	41	22	42	39	36	42	10	24	9	5	8	5	2	5	0	1	4	3	56	20	53	48	67	71	4	7	4	5	5	2	98	100	101	8	4	8	69	70	70
851698.TRM1	834	818	1198	835	559	518	999	691	519	464	163	419	260	395	349	527	675	1070	899	94	81	73	293	547	430	567	870	662	483	879	625	233	517	357	607	1051	786	677	525	1050	818	674	967	509	1237	636	454	482	468
851699.DPB4	270	260	332	295	206	274	245	234	325	247	142	215	160	211	204	253	252	237	250	859	891	995	178	255	258	233	373	294	196	265	279	129	240	161	226	263	325	341	161	343	297	222	330	156	235	206	438	411	458
851700.KIN1	270	240	352	293	166	105	184	285	335	356	43	290	110	367	314	505	134	205	150	77	63	72	147	229	166	303	512	372	244	291	341	178	231	189	260	441	318	197	155	217	249	176	279	154	155	205	238	249	224
851701.INO2	109	96	117	117	76	59	72	137	121	179	46	152	84	108	120	177	74	212	116	0	4	3	48	105	82	45	92	67	126	120	179	111	134	99	118	224	154	76	59	93	122	91	128	67	116	85	74	84	81
851702.None	37	35	56	41	24	28	37	36	101	115	82	112	117	61	50	83	38	69	48	12	16	19	31	45	31	29	45	29	76	49	127	40	63	55	33	67	44	31	25	39	45	24	40	52	55	42	115	106	128
851703.ECM18	41	42	52	25	31	47	37	36	67	60	53	93	71	56	50	75	37	43	34	20	41	40	28	29	18	21	40	23	59	40	116	40	66	59	28	41	39	26	40	30	20	25	34	36	43	39	66	73	55
851704.SWF1	100	87	146	146	81	77	90	81	137	135	115	132	146	115	101	121	59	111	60	78	67	94	45	72	45	98	115	99	104	65	133	88	157	113	78	104	86	106	75	113	102	89	112	97	107	89	83	79	94
851705.ARO1	907	814	1381	1239	710	597	973	1602	1783	1944	321	1337	709	1061	1105	1634	863	2165	1301	425	512	509	435	678	507	1344	1992	1530	1083	1303	1470	727	1264	949	1128	1636	1395	1283	1099	1656	1217	983	1187	1202	1526	1373	1240	1342	1270
851706.MTC5	295	235	367	299	195	199	275	226	257	230	87	233	112	227	226	372	129	307	182	293	345	397	126	280	195	221	376	310	230	313	367	113	226	181	221	287	276	289	170	385	370	264	349	180	249	238	195	207	217
851707.SAC6	1344	1343	2283	2607	1049	905	1825	1503	2631	2707	732	3183	1256	3188	3082	4857	1122	2078	1428	2108	2205	2375	1568	1896	1816	2240	3521	2685	2859	3501	4467	2620	4929	3646	2349	4771	3313	2060	1462	3085	1263	1051	1487	1418	1856	1917	1436	1544	1460
851708.FIN1	122	138	165	125	105	119	176	133	123	163	103	137	103	77	100	144	123	165	143	156	157	180	120	194	154	61	117	96	141	153	204	166	248	149	121	136	129	113	68	155	148	129	140	77	124	76	101	109	132
851709.None	91	99	123	125	90	62	119	170	192	211	132	175	149	109	75	134	105	162	139	419	446	474	47	145	88	67	103	86	131	116	154	63	103	89	91	115	96	88	72	118	113	90	85	55	73	52	180	207	190
851710.None	109	98	109	115	63	56	85	92	156	158	74	172	94	87	83	124	85	70	122	79	70	75	42	78	43	103	110	93	91	76	111	60	99	89	82	102	79	101	56	110	95	62	107	62	76	61	143	117	136
851712.None	5459	5557	5742	1522	1359	1580	1467	2743	1683	2104	552	1463	888	521	595	584	1767	944	1763	101	85	120	418	402	304	2814	2844	2349	1536	770	1594	444	715	456	1716	1986	1606	3022	1940	3076	5733	5536	4758	1264	1552	1100	2361	2750	2591
851713.YCF1	627	714	1116	865	399	356	634	551	997	1051	589	1002	847	687	704	1106	241	586	442	425	407	433	552	914	696	825	1329	1109	759	992	1197	526	1009	771	717	962	1084	611	518	872	742	616	945	557	681	716	502	493	461
851714.RGP1	271	284	322	276	189	188	238	316	385	376	126	355	227	310	285	384	155	340	224	33	35	36	208	422	270	221	268	195	327	351	417	224	330	240	236	405	338	250	209	299	276	258	282	259	243	239	228	245	220
851716.HPR1	287	292	436	299	178	185	217	195	180	149	48	231	97	231	198	340	226	296	333	25	23	36	124	303	210	242	419	289	229	265	346	152	277	178	235	318	328	273	214	358	289	253	317	184	304	251	206	215	218
851717.RUB1	623	699	522	606	1030	1077	821	480	562	550	497	354	585	479	478	442	290	124	209	82	99	129	976	786	613	443	464	319	711	449	656	834	941	625	459	308	382	686	632	596	604	545	462	753	613	537	382	380	320
851718.MTQ2	166	214	269	234	197	208	251	200	234	225	215	197	243	132	131	224	131	246	141	145	154	148	145	251	204	166	177	204	214	259	266	139	248	198	142	215	194	173	144	191	181	154	232	187	253	169	162	156	164
851719.DOP1	408	338	533	363	218	193	305	541	607	645	162	669	317	437	374	588	300	535	412	295	368	355	195	409	240	478	625	504	315	531	481	270	443	311	390	582	471	368	287	494	416	324	420	270	330	298	442	466	434
851720.PEX7	133	117	194	190	153	127	191	61	124	137	44	99	65	123	107	205	85	138	79	157	142	172	124	182	164	92	128	106	152	161	221	121	212	177	92	132	150	131	89	150	141	135	176	129	157	161	125	181	169
851721.SAN1	259	242	371	338	214	196	303	430	354	373	61	393	125	146	146	220	448	676	578	55	67	80	188	252	209	222	321	268	247	429	295	134	323	205	276	340	368	351	208	474	328	333	418	216	315	226	501	542	505
851722.MKC7	490	408	614	587	304	296	465	306	351	285	155	444	240	402	405	596	503	1083	670	95	75	105	207	332	286	415	617	479	413	667	631	233	369	245	524	806	675	412	358	519	553	420	636	491	982	623	457	430	445
851723.TAF12	494	467	680	554	368	313	489	370	314	269	70	358	146	454	422	668	306	745	359	23	22	21	332	814	548	456	770	552	593	685	843	262	493	363	464	813	586	456	354	638	471	431	509	357	493	372	290	293	285
851724.SWI5	156	138	187	191	157	184	248	236	236	238	79	209	159	109	117	159	123	281	173	22	23	36	133	311	199	145	237	193	225	271	284	67	162	125	148	251	177	184	101	279	258	206	256	109	227	95	214	201	235
851725.EKI1	206	203	270	185	160	171	219	334	469	464	350	546	421	230	185	299	224	556	289	106	133	134	170	333	287	221	303	266	430	356	690	208	380	278	221	461	256	194	131	234	195	181	252	158	263	160	347	382	349
851726.KGD2	523	543	766	536	391	465	603	1131	1150	1261	304	1215	512	570	572	891	586	1459	863	728	755	786	372	544	441	310	459	369	484	799	704	525	955	637	368	576	521	403	464	515	597	575	705	692	816	793	661	657	706
851727.NUM1	381	316	549	332	189	193	281	200	244	247	49	301	110	317	329	555	246	419	365	60	46	70	161	387	282	365	611	472	306	392	458	166	279	246	289	298	367	320	299	396	422	384	461	300	388	352	260	295	309
851729.CTH1	276	288	375	193	215	228	242	249	205	215	68	213	126	238	241	278	190	364	187	32	32	34	186	297	195	281	320	255	436	365	488	208	336	230	220	328	219	296	239	357	303	290	266	247	246	245	219	248	194
851730.GIR2	668	692	688	569	567	548	633	520	430	462	215	400	272	396	405	475	593	705	596	75	85	97	346	480	342	575	629	511	532	572	496	298	353	289	558	540	581	700	537	794	620	523	544	624	876	508	479	510	462
851731.ENT5	381	352	472	366	304	269	414	548	455	427	72	523	175	313	366	392	488	1395	580	134	138	140	153	359	222	407	511	371	367	457	470	179	301	212	411	500	441	439	318	509	514	406	551	388	563	416	524	545	509
851733.CPR1	8490	8558	8800	8251	6953	7117	7478	7285	7093	6847	2551	7288	3359	8591	9271	9996	5391	7263	5603	456	388	444	10679	7713	7258	7390	7817	6639	11926	10817	12945	6430	8275	5898	8967	9050	9595	7842	7919	8398	6823	6392	5580	8693	8207	8172	7119	7381	7141
851734.RPA14	398	344	462	436	336	567	527	536	453	398	273	415	353	210	187	260	626	1015	627	87	72	103	412	545	424	245	345	222	335	461	405	259	457	384	276	222	321	410	270	488	483	612	558	293	366	293	528	553	585
851735.None	5	3	8	4	5	7	4	0	1	1	3	2	1	0	1	4	10	11	6	8	9	7	4	2	8	1	2	1	9	4	10	1	4	5	0	4	5	2	7	3	3	6	5	2	12	11	8	8	8
851736.HOM2	1380	1452	1804	1861	1767	1649	2183	1271	1853	1850	1001	1392	1175	1486	1342	1909	1071	1938	1325	210	178	208	1563	1563	1418	1863	2375	1888	2147	1836	2885	1129	1949	1406	1470	1769	1823	1747	1755	1980	1547	1268	1620	2452	3119	2566	1764	1698	1744
851737.SAC3	307	289	400	274	181	190	237	339	295	312	32	241	112	283	247	369	191	394	292	97	90	112	106	316	214	250	360	274	198	320	288	132	276	197	285	399	287	249	203	313	270	235	293	282	304	257	227	275	246
851738.SSY1	226	204	282	238	190	150	233	203	242	331	110	256	185	214	187	306	142	275	193	263	294	312	159	251	230	138	293	230	230	270	356	143	323	227	149	276	260	225	165	278	277	192	274	198	298	307	261	314	267
851739.ACL4	849	773	1106	955	898	802	926	773	744	709	342	608	485	403	345	471	838	2167	1170	957	998	1041	392	703	558	630	890	713	806	790	1070	432	784	611	708	883	780	1191	706	1413	1010	805	935	587	1272	658	619	695	700
851740.NBP2	208	249	302	227	172	190	227	140	133	125	48	143	85	209	175	246	150	276	189	48	59	55	140	249	208	206	281	233	211	208	229	116	204	136	186	219	206	160	188	243	232	196	279	214	251	225	131	150	140
851741.CWC15	192	220	174	161	104	169	124	62	49	67	35	51	26	143	136	188	43	27	29	8	7	14	125	164	112	164	212	158	140	146	164	84	128	90	155	182	145	127	141	175	209	173	180	131	194	174	49	37	37
851742.SEC1	302	288	417	319	276	241	301	338	324	312	72	273	127	283	313	462	182	235	209	31	46	50	131	330	192	357	446	381	199	390	275	150	281	187	314	436	366	331	253	414	306	231	322	242	350	302	245	266	280
851743.TRM82	890	971	1208	939	888	870	1095	1037	885	963	630	840	896	461	469	550	871	1587	1116	1070	1141	1252	411	740	679	716	876	734	609	819	736	385	713	501	790	872	893	992	714	1185	1031	826	1016	636	1185	726	801	734	800
851744.SEC5	285	236	414	285	215	178	270	270	321	331	177	316	302	219	222	324	182	296	224	310	322	378	188	303	235	265	381	278	246	286	342	175	368	281	255	348	284	267	185	364	288	252	336	201	246	249	251	251	278
851745.TAF10	342	372	400	375	281	318	329	572	573	566	334	475	395	288	265	334	275	442	284	104	126	150	336	358	332	267	377	293	280	365	425	230	262	232	298	320	389	396	304	427	379	318	350	326	429	364	301	309	300
851746.CDC37	634	625	659	609	465	505	583	610	657	695	344	655	430	646	598	723	429	611	474	211	196	211	436	794	542	638	642	554	515	513	590	472	625	452	536	765	600	479	430	535	583	567	600	544	664	481	505	522	534
851747.STB3	216	180	291	225	125	87	206	210	182	194	13	283	51	220	219	365	166	415	255	9	17	8	90	239	153	198	318	226	133	286	223	120	241	188	220	296	251	176	137	209	219	268	285	158	165	218	285	293	246
1466433.None	1	2	4	5	2	0	3	0	0	0	0	0	0	0	2	2	0	0	0	0	0	0	2	0	3	1	1	1	3	6	11	0	2	3	1	2	3	1	4	4	1	2	2	6	1	1	0	0	0
851748.SEC7	686	630	925	818	380	314	592	502	589	689	89	577	254	828	765	1111	313	475	399	570	504	587	410	860	681	782	1048	870	632	904	931	447	852	612	694	956	910	690	575	941	686	574	791	599	642	651	425	457	423
851750.None	122	90	156	175	169	173	279	0	0	0	0	0	0	35	46	82	0	0	0	0	0	0	0	1	0	26	30	22	66	123	123	42	65	49	32	56	52	76	121	90	38	33	40	80	99	85	0	0	0
851751.HSP42	112	111	172	105	75	58	100	271	363	435	38	164	129	342	346	511	21	70	36	114	135	141	64	121	98	102	169	146	513	77	718	160	248	191	70	54	96	22	77	30	91	80	109	150	42	205	310	369	320
851752.SUP35	2049	1944	2879	2203	1423	1382	2137	2887	2463	2615	789	2481	1200	1486	1482	2099	2668	6159	4013	452	420	541	968	1759	1339	1877	2910	2166	1341	2510	2013	862	1641	1226	1914	2778	2528	2250	1742	3059	2326	1981	2641	1828	2852	2159	2466	2452	2526
851753.ARG82	100	94	109	93	58	77	101	170	195	191	136	158	178	58	37	70	95	122	126	79	125	79	65	99	76	74	96	74	102	81	126	48	82	45	62	80	85	69	49	88	81	88	88	93	98	83	169	161	190
851754.HMO1	1247	1270	1526	1195	1055	1072	1182	773	973	1059	609	1214	908	1012	925	1182	713	982	871	213	200	225	1033	1207	986	812	1036	827	1655	1436	1823	1294	1871	1317	1037	1759	1212	1157	1036	1366	1318	1146	1177	1118	1146	1047	975	1065	994
851755.RSM24	301	327	499	307	409	438	509	465	451	437	120	598	194	182	193	287	621	1144	719	728	823	846	259	366	314	202	252	190	280	278	384	251	382	307	195	260	240	198	322	261	384	280	387	454	521	494	499	491	519
851756.NGG1	324	286	440	305	178	188	281	286	238	252	65	283	88	210	239	323	242	396	289	64	55	61	140	339	190	241	392	275	276	320	409	160	225	206	277	369	369	224	153	302	371	258	367	269	371	299	224	284	328
851757.UBC1	533	621	644	592	474	531	523	665	681	672	238	652	252	603	580	678	463	504	495	51	61	79	549	603	550	508	615	474	582	574	642	405	622	474	543	691	674	574	503	617	691	567	574	646	759	618	454	482	491
851758.SDH4	456	432	434	222	282	232	263	463	577	566	145	649	285	449	510	595	211	105	217	66	43	50	269	215	174	182	240	178	303	335	406	416	555	372	186	334	198	226	449	238	410	357	380	760	481	679	277	309	294
851759.CSN9	58	72	67	58	52	76	57	67	69	61	36	45	33	35	16	23	19	28	32	4	2	6	57	96	72	52	63	39	53	39	49	47	56	50	41	62	35	56	46	60	66	60	69	31	65	37	26	39	23
851760.NVJ3	161	164	203	122	135	136	172	186	170	142	65	91	91	85	72	143	58	94	82	163	197	186	95	124	119	87	128	111	183	119	220	104	195	132	104	150	123	122	91	137	114	125	144	97	180	97	70	78	110
851761.SCC2	164	133	176	117	93	97	111	200	158	171	63	134	81	79	68	115	116	122	147	111	100	127	42	145	100	152	181	145	117	151	153	37	126	79	130	126	152	147	98	132	148	119	170	115	160	148	172	159	167
851762.SAS4	182	122	256	191	134	120	190	103	95	72	52	79	47	130	136	177	47	78	57	6	12	6	126	266	175	95	145	118	187	228	281	74	147	109	124	187	143	155	131	214	160	132	197	133	206	165	38	59	74
851763.CDC1	398	327	434	393	382	344	411	233	323	257	261	278	296	342	345	546	161	240	207	34	37	36	350	583	451	253	398	336	451	536	657	311	638	363	297	448	382	340	262	451	392	276	386	318	409	349	213	234	230
1466434.None	9	12	17	7	5	16	7	0	0	1	2	0	0	7	8	3	0	0	1	0	0	0	11	8	5	7	5	11	21	6	22	14	10	11	5	3	3	8	4	12	9	1	6	7	7	6	0	1	0
851764.PLP1	147	174	228	186	162	126	199	177	172	116	44	93	90	80	91	140	80	124	103	28	19	22	140	228	162	123	114	118	118	122	136	90	179	122	132	123	135	133	128	163	165	137	112	144	156	149	70	89	94
851765.ATC1	505	494	515	307	307	268	330	281	181	158	128	199	144	219	192	275	317	227	364	421	391	478	152	281	179	264	318	252	290	349	293	160	248	181	308	341	339	436	344	512	480	411	417	357	536	343	292	332	317
851766.UPS3	147	141	160	113	119	118	136	44	96	100	67	122	79	71	79	114	66	48	91	68	77	54	101	95	86	47	75	54	163	128	208	108	136	84	70	95	115	114	91	117	81	68	75	84	105	99	68	61	94
851767.SND1	520	503	700	387	294	237	378	354	228	262	29	228	75	328	300	441	164	279	220	31	34	34	184	420	316	368	586	399	360	662	505	197	365	267	393	598	494	485	369	658	568	464	576	340	578	388	222	190	208
851768.CCT6	1401	1370	2666	2287	1335	1059	2281	1929	1915	1991	328	1665	717	1301	1277	2340	1112	3768	1999	241	306	330	978	1478	1428	1340	2450	1723	1531	2652	2542	724	1732	1199	1539	2489	2484	1375	1278	2324	1649	1248	2190	1608	2848	2322	1354	1404	1393
851770.SLY1	591	505	784	572	385	375	539	600	700	688	178	625	272	580	470	668	436	843	600	1156	1121	1148	286	575	360	662	819	688	504	650	647	280	486	324	532	782	719	503	420	658	613	555	625	456	660	530	838	810	918
851771.RVB1	1071	963	1376	1065	786	794	1172	1195	1020	1067	436	889	589	741	668	1075	756	1878	1124	111	100	129	629	970	818	931	1416	1028	862	1293	1238	521	959	636	883	1355	1211	1151	849	1450	1148	997	1219	979	1386	999	692	759	701
851772.HST4	59	70	76	65	63	57	71	83	76	73	22	101	62	29	43	39	55	86	75	85	72	99	35	57	36	26	59	60	58	85	89	47	76	73	38	76	54	43	35	51	60	59	74	36	57	46	104	111	109
851774.NUP42	232	222	327	225	150	152	216	211	186	186	81	159	103	107	124	181	161	373	213	27	31	24	114	221	123	181	242	200	176	258	214	72	117	112	159	258	213	196	191	265	229	173	211	139	234	166	131	143	143
851775.MSS116	900	935	1187	783	812	739	1001	1271	1175	1255	350	1352	558	578	535	826	1574	2298	1970	141	162	152	351	702	607	436	565	440	525	644	810	527	963	669	587	907	690	678	638	812	1055	836	950	873	1361	892	821	784	850
1466435.None	0	0	1	0	0	1	0	0	0	0	0	0	0	0	0	0	0	0	0	0	0	1	0	0	0	0	0	0	0	0	0	0	0	0	0	0	0	0	0	1	1	0	0	0	1	0	0	0	0
851776.REF2	191	157	214	142	157	135	153	224	175	150	56	120	92	114	119	145	119	131	145	51	42	48	89	146	105	123	174	146	125	126	186	63	119	101	143	164	146	173	123	188	230	193	216	101	263	126	116	85	106
851777.CAB5	256	291	320	270	297	345	330	237	369	346	265	341	299	170	192	325	185	290	228	706	814	864	312	397	319	178	202	178	319	238	422	278	352	265	202	217	217	214	212	265	217	199	239	255	284	266	360	425	364
851778.CBS2	174	188	209	123	126	139	170	190	197	180	74	216	136	158	139	144	233	195	253	121	110	140	93	128	121	86	99	108	152	140	187	159	201	135	134	131	140	169	137	149	176	178	203	169	194	137	158	189	169
851779.RKM2	215	215	256	207	252	204	279	238	261	264	164	239	213	123	120	145	207	245	237	91	91	85	171	231	151	157	197	163	178	237	271	108	163	181	168	161	195	232	148	258	169	148	216	184	286	186	169	162	216
851781.VPS64	182	187	231	156	100	83	156	98	104	112	23	115	43	153	158	244	71	84	93	73	83	97	87	194	147	115	196	155	135	199	228	93	187	104	145	207	175	92	108	169	221	137	185	135	217	149	118	107	105
851782.SPC19	122	141	129	114	124	137	122	126	152	144	128	136	117	79	70	116	129	85	116	42	31	29	102	131	132	72	83	94	70	99	97	72	120	94	106	101	95	69	81	88	89	81	73	102	145	114	96	99	122
851784.RAV2	159	146	190	138	120	139	182	210	262	278	108	239	173	160	142	176	65	136	109	23	34	29	128	217	159	92	108	122	149	136	178	90	169	122	126	141	162	79	86	86	174	107	134	115	129	162	120	116	138
851785.COQ4	202	164	207	210	197	171	217	234	313	274	112	374	207	223	203	262	141	283	192	439	495	574	267	235	232	75	115	107	358	228	437	203	315	213	129	217	187	111	106	133	156	119	124	208	154	197	283	321	308
851786.MSC2	194	197	244	206	135	155	171	226	208	168	95	317	107	138	174	253	252	343	310	122	102	158	106	163	115	143	232	155	165	271	251	117	167	139	175	234	219	187	127	225	207	165	223	153	189	180	273	287	266
851787.EBS1	830	725	1009	763	585	506	702	759	671	670	229	597	483	622	597	954	727	1216	839	259	217	273	335	823	570	687	884	751	818	1036	1106	504	939	704	732	1000	908	943	625	1169	899	755	938	568	861	661	527	557	495
851788.UME6	197	163	257	200	133	107	173	205	136	120	31	126	43	87	116	122	179	431	233	12	21	26	84	164	130	230	282	224	187	204	239	54	117	81	141	304	220	63	111	121	209	151	243	201	252	224	175	186	178
851789.MSS4	453	435	659	390	268	223	369	545	459	484	117	449	251	347	309	522	335	623	462	151	180	161	217	487	329	359	520	366	409	609	657	205	468	302	296	500	445	345	308	420	540	471	611	373	474	385	406	413	410
851791.None	2115	2277	2182	1757	1501	1479	1405	321	740	697	1053	942	1178	2292	2145	2612	160	156	214	703	820	777	3155	4145	3057	1749	1578	1552	4786	2050	5380	3654	5210	3663	2306	2285	2276	1815	1557	2048	897	849	778	1675	1752	1577	535	508	481
851790.None	0	0	0	0	0	0	0	0	0	0	0	0	0	0	0	0	0	0	0	0	0	0	0	0	0	0	0	0	0	0	0	0	0	0	0	0	0	0	0	0	0	0	0	0	0	0	0	0	0
851793.None	9	13	33	54	50	70	81	0	0	0	0	0	0	4	2	4	0	0	0	0	0	0	59	144	64	87	129	77	20	35	28	0	2	0	136	120	168	65	70	91	61	68	58	158	174	148	0	0	0
851792.None	0	0	0	0	0	0	0	0	0	0	0	0	0	0	0	0	0	0	0	0	0	0	0	0	0	0	0	0	0	0	0	0	0	0	0	0	0	0	0	0	0	0	0	0	0	0	0	0	0
851794.YDR210W-D	196	212	330	408	248	212	277	159	100	127	4	197	42	0	0	0	27	27	22	15	7	15	20	59	39	16	20	20	226	505	493	3	0	5	0	0	1	11	32	10	8	5	8	3	2	5	3	11	7
851795.YDR210W-C	0	0	0	0	0	0	0	0	0	0	0	0	0	0	0	0	0	0	0	0	0	0	0	0	0	0	0	0	0	0	0	0	0	0	0	0	0	0	0	0	0	0	0	0	0	0	0	0	0
851797.GCD6	899	816	1188	953	605	531	864	889	749	819	301	613	437	690	715	1114	522	870	770	919	818	983	547	1065	710	880	1144	939	1080	1142	1359	454	796	559	858	1179	1158	856	667	1165	954	818	1026	792	1095	844	724	770	711
851798.TCP1	1072	1110	1543	1116	928	840	1227	1598	1478	1401	471	1077	686	902	830	1116	1162	2156	1487	86	85	92	804	972	903	903	1214	1060	1138	1142	1586	679	1207	794	876	1182	1229	1131	1002	1373	1016	815	1116	1237	1494	1250	1025	1040	983
851799.UPC2	147	146	252	313	83	95	180	546	432	449	64	683	152	249	239	366	360	1060	550	86	88	112	78	147	129	279	498	356	138	355	239	314	559	368	241	428	340	424	356	613	125	136	194	357	399	472	547	557	533
851800.AHA1	973	904	1389	785	584	561	801	1353	1475	1476	473	1172	678	674	722	999	544	1259	691	526	543	570	461	605	505	926	1364	988	986	622	1340	371	672	497	684	744	973	398	826	646	791	719	800	1429	1103	1606	1170	1161	1150
851801.None	1	2	2	5	3	0	4	9	8	13	2	9	4	2	3	0	3	4	4	23	23	48	4	2	0	3	7	3	29	10	37	0	4	6	1	8	2	2	0	4	5	1	0	0	1	2	11	12	15
851802.ADR1	24	35	47	48	49	43	54	19	40	32	12	87	25	13	25	30	47	67	57	21	16	23	14	36	13	41	48	31	189	168	334	47	111	89	30	26	15	37	26	35	85	75	111	37	24	27	88	79	61
851803.RAD9	212	163	255	206	171	137	216	117	118	116	10	91	38	143	146	222	149	257	155	18	18	29	80	257	189	203	319	249	114	254	191	66	185	119	175	231	234	163	147	238	223	205	211	179	292	210	99	115	125
851804.SPR28	25	16	23	73	13	17	22	0	8	2	0	10	2	21	13	11	25	5	19	13	15	10	7	6	6	37	27	26	14	10	20	10	19	7	19	15	26	3	12	13	21	22	17	21	14	17	14	13	17
851805.MFB1	162	151	148	106	107	102	146	96	116	119	47	133	78	86	89	144	71	133	121	19	16	23	80	192	118	84	124	93	167	104	202	105	160	82	101	146	113	105	84	108	137	119	131	109	121	102	106	81	105
851807.GTB1	230	182	258	188	174	150	232	409	482	532	268	334	358	247	223	336	125	321	155	137	155	116	117	307	201	162	230	174	208	241	312	190	288	215	242	290	247	215	183	286	229	190	213	256	287	246	158	183	160
851808.None	148	121	187	120	116	106	125	118	161	174	44	118	80	132	120	173	80	165	100	228	241	302	136	266	151	74	71	74	463	163	695	153	268	219	75	120	87	88	179	114	129	119	119	316	197	287	136	94	102
851809.CRF1	91	106	101	93	60	40	62	61	92	70	45	48	62	92	116	132	28	32	18	26	23	24	18	41	28	72	103	105	121	76	164	54	88	49	67	92	80	90	56	120	95	63	74	31	24	34	34	49	40
851810.HTB1	4701	4944	4788	4431	4842	5183	5032	3278	4001	3857	3156	3849	3523	4391	4258	5134	3959	2455	3675	1619	1706	1773	2864	4527	3205	3824	3804	3229	3388	3150	3748	2914	4131	2966	4565	4326	4840	3375	4098	3534	4175	3669	3454	5908	5869	5180	2741	2927	2802
851811.HTA1	3650	3985	4446	5286	4827	5698	6093	3534	3972	4316	2978	3141	3714	3859	3566	4996	2344	3018	2774	977	1034	1278	3726	3758	3450	3255	3998	3590	4457	3029	5798	3491	5970	4153	4100	4283	5206	2772	3758	3279	3067	2785	3293	5031	5161	5246	2652	2656	2614
851812.ADK1	3906	3815	4183	3931	4157	4293	4333	2815	3148	3268	1875	2551	2187	3266	3264	3951	2567	2132	2705	417	367	415	4568	3903	3444	2969	3412	2651	3704	3893	4105	3903	5205	3836	3874	4620	4041	4863	4195	5075	3496	3232	2980	4435	4871	4119	2746	2880	2830
851813.SIR4	204	196	232	178	158	154	199	71	50	51	21	68	30	116	147	182	55	115	87	35	34	37	175	379	251	195	250	199	174	215	227	85	158	97	154	192	199	177	142	213	228	208	263	139	188	146	62	66	63
851814.PCF11	181	165	196	173	111	111	144	190	159	178	60	157	89	127	111	160	132	114	132	219	213	242	96	147	99	178	235	146	179	198	256	82	128	72	138	226	210	121	97	142	192	197	231	130	195	131	138	150	129
851815.IVY1	193	194	235	185	126	146	170	174	178	193	45	274	64	207	182	314	111	302	155	55	46	54	86	195	140	165	272	199	137	232	184	84	183	120	205	286	241	159	118	203	170	149	189	163	187	195	182	153	171
851817.COX20	152	145	239	202	203	180	272	295	362	395	125	508	219	176	146	254	173	468	216	105	118	94	129	136	170	161	229	221	183	207	332	145	282	198	118	146	182	175	146	220	295	228	316	223	205	222	341	350	329
851818.HEM1	792	773	1212	819	594	598	970	910	939	976	144	1044	288	726	673	1192	729	2063	1068	259	254	287	445	574	461	933	1478	1112	541	1133	837	447	859	685	640	994	955	1304	1060	2016	1348	1060	1653	1036	1547	1228	960	1071	991
851819.RTN1	2777	2601	2779	2651	2318	2268	2399	2482	2576	2611	2500	2771	2613	5020	4862	5751	2489	2272	2425	566	570	697	1818	2370	1682	2559	2683	2204	2252	2717	2367	1869	2862	1944	2946	2887	3126	2900	2687	2771	3295	3236	2800	2909	3177	2798	3001	3042	2997
851820.LYS4	623	589	1016	739	453	353	623	562	638	549	121	508	217	820	828	1289	241	711	438	103	96	109	419	500	434	481	793	577	544	1005	872	458	950	707	601	929	884	876	819	1306	810	634	961	1021	1951	1272	564	581	548
851821.PRP42	288	264	357	389	411	334	367	294	347	376	298	301	377	278	340	412	167	134	183	102	109	148	315	540	430	263	352	259	533	284	669	378	505	345	420	500	458	330	281	409	242	250	241	227	263	213	196	197	200
851822.FMN1	190	247	264	289	253	278	298	457	802	685	723	600	926	298	270	405	211	464	238	646	686	710	420	385	394	242	309	257	538	433	632	325	547	377	262	307	314	238	251	311	249	244	282	332	289	310	508	528	500
851823.MRPL7	417	423	555	402	489	450	606	543	551	541	128	632	210	258	248	335	798	1064	883	579	595	686	289	321	312	217	328	238	233	296	326	279	421	357	243	277	303	276	325	344	457	345	445	482	596	548	422	434	449
851824.SEC26	1156	1037	1404	1262	749	588	980	1277	1426	1636	732	1417	1047	1232	1247	1657	762	1387	1014	521	489	592	710	1219	849	1199	1744	1297	1005	1550	1555	709	1195	836	1212	1923	1496	1140	1012	1454	1373	1177	1460	1127	1376	1277	1123	1093	1140
851825.None	189	179	297	205	149	130	202	197	176	220	119	210	186	137	169	255	132	379	176	498	575	579	145	232	182	162	239	146	220	280	299	114	216	155	175	245	231	168	167	231	260	176	274	132	222	203	139	197	154
851827.SNU56	180	151	209	161	160	139	192	190	157	165	61	157	130	129	116	166	167	259	187	263	305	300	109	205	139	95	163	122	205	206	284	89	215	117	117	170	163	142	127	211	151	139	174	140	186	156	173	198	167
851829.AMD2	147	116	187	129	85	81	93	145	160	214	29	188	62	156	158	280	182	361	211	353	333	371	71	72	73	139	178	163	128	181	144	119	184	132	124	192	144	117	110	172	150	109	132	143	142	132	193	177	162
851830.PRP28	125	102	209	159	130	97	167	249	207	248	59	249	97	107	71	125	204	407	291	61	74	63	48	126	89	66	123	91	78	186	136	89	135	133	126	172	143	131	94	146	131	88	150	92	224	119	135	142	134
851831.PEX5	201	189	285	274	160	161	296	281	313	321	125	325	170	218	232	307	202	521	297	95	100	93	138	291	193	173	241	188	444	393	649	202	403	248	237	440	319	159	142	202	184	226	225	178	285	201	245	269	278
851832.MNN10	1008	951	1256	1080	1003	961	1194	748	818	847	689	778	902	729	682	937	567	1082	695	315	316	375	845	1320	1009	703	988	747	1076	1015	1580	687	1229	878	850	1080	999	930	795	1193	900	814	949	823	1231	888	544	597	586
851833.TRS23	201	184	344	308	199	149	319	235	258	221	87	235	171	249	241	407	145	391	218	272	287	306	153	234	208	169	287	251	146	348	286	144	302	244	195	311	375	172	120	274	246	169	292	170	267	213	199	275	245
1466436.None	18	20	13	12	2	6	6	0	4	1	0	0	1	10	7	17	4	3	6	2	1	1	6	11	17	6	11	9	18	11	17	6	12	16	4	8	5	9	15	12	9	9	9	33	33	43	0	0	5
851834.VHS1	60	68	80	60	35	27	48	164	181	184	7	123	38	120	131	181	31	164	84	17	9	8	17	43	28	61	103	74	49	80	56	77	106	96	53	83	70	47	95	71	63	81	94	165	169	208	90	111	79
851835.None	154	171	168	128	155	183	155	163	296	280	147	501	165	232	195	234	247	549	320	113	111	171	193	232	194	129	126	119	95	109	109	142	227	138	111	98	134	147	154	155	133	117	112	148	120	147	267	223	247
851836.None	102	111	110	128	119	97	119	101	125	133	72	120	101	88	115	134	126	108	132	113	101	96	128	229	173	86	103	88	198	104	274	92	149	114	94	124	117	100	97	79	97	90	88	89	85	90	86	139	98
851838.PAM1	461	403	632	523	358	320	507	436	465	513	176	620	219	564	584	788	307	474	442	49	65	64	355	697	457	438	664	461	423	499	618	270	408	283	485	674	569	378	296	414	395	358	416	366	352	413	398	394	487
851839.BTT1	52	48	51	36	36	28	36	38	52	57	13	58	33	34	40	35	26	18	32	12	4	8	23	28	33	39	46	36	33	33	39	21	37	20	31	47	22	36	24	45	30	34	22	33	27	41	36	36	44
851840.MET32	88	95	96	94	49	43	84	56	72	75	36	53	77	58	68	96	44	56	41	79	85	79	68	81	86	56	82	88	83	90	122	49	69	50	60	75	61	78	60	86	62	57	59	51	86	86	60	62	75
851841.CHL4	118	96	133	115	75	85	94	62	91	82	31	99	57	131	125	176	36	66	75	77	56	59	70	179	157	104	134	129	166	137	259	84	187	130	98	144	107	92	65	79	98	72	67	90	100	98	86	73	65
851842.RMD5	79	79	121	99	88	78	125	88	111	106	15	111	37	127	113	178	41	67	54	168	137	146	83	105	90	84	146	92	105	88	193	75	110	88	108	107	104	55	57	84	77	56	81	72	67	68	119	125	116
851843.CTA1	106	92	158	105	124	79	137	129	143	143	50	139	47	91	105	154	73	216	100	234	197	193	81	109	85	83	125	118	120	158	203	75	150	115	81	136	123	139	82	141	108	91	145	113	137	117	99	113	86
851844.RKM4	383	368	547	398	304	301	457	346	341	326	123	389	203	337	321	429	454	826	592	319	392	368	232	491	384	305	516	378	510	409	727	276	507	378	307	435	412	368	317	494	329	289	424	427	564	459	412	410	427
851845.HSP78	210	179	255	247	194	168	261	381	564	622	80	708	200	341	357	545	58	182	88	88	85	103	96	236	161	211	285	269	640	205	933	282	493	344	224	321	283	79	208	94	210	187	226	379	221	459	334	316	344
851846.YAP6	150	124	156	101	50	73	138	122	155	130	21	138	56	115	107	138	144	229	160	83	100	96	81	189	136	194	271	167	53	70	78	32	58	50	95	149	131	92	104	100	180	157	141	133	158	131	107	163	154
851847.SWM1	184	224	240	175	125	132	160	201	266	276	100	224	177	178	177	256	98	212	110	41	51	55	187	159	167	224	324	237	236	255	305	162	281	156	140	211	183	227	166	284	256	201	227	177	219	189	121	135	135
851848.EXG2	257	234	365	307	185	193	296	121	190	177	90	220	144	372	332	598	130	195	154	258	242	259	194	377	281	216	378	284	330	341	613	235	483	375	210	293	305	182	240	262	398	323	450	294	378	386	145	184	153
851851.None	67	66	145	1055	127	128	181	0	11	0	0	0	0	140	141	177	53	52	58	24	34	33	236	391	261	225	353	280	238	263	333	9	17	27	382	463	514	245	442	358	124	114	155	210	221	198	33	34	34
851850.None	0	0	0	0	0	0	0	0	0	0	0	0	0	0	0	0	0	0	0	0	0	0	0	0	0	0	0	0	0	0	0	0	0	0	0	0	0	0	0	0	0	0	0	0	0	0	0	0	0
851852.None	1	0	0	69	0	1	0	9	22	18	0	0	0	0	0	0	0	1	0	0	0	0	0	12	8	0	0	0	31	26	50	0	0	0	0	0	0	0	0	0	0	0	0	5	10	8	0	0	0
851853.None	0	0	0	0	0	0	0	0	0	0	0	0	0	0	0	0	0	0	0	0	0	0	0	0	0	0	0	0	0	0	0	0	0	0	0	0	0	0	0	0	0	0	0	0	0	0	0	0	0
851855.None	101	112	152	297	133	89	174	207	334	398	211	290	351	230	281	382	110	341	148	37	48	47	185	223	183	162	241	166	286	324	383	178	290	253	149	229	223	219	118	267	212	175	252	127	142	115	206	214	200
851856.DIN7	65	37	68	75	37	31	41	15	19	18	10	20	9	38	30	55	10	14	16	21	13	21	28	93	48	42	72	71	132	81	173	21	44	39	70	88	69	40	48	44	30	41	47	26	37	54	34	63	38
851857.AKR1	556	435	635	1201	366	313	447	491	697	710	366	703	534	493	476	677	265	553	388	893	964	1006	473	573	464	527	751	654	493	865	690	420	677	429	1332	1823	1908	503	364	627	486	446	520	362	509	481	680	758	691
851858.PEX10	183	171	191	183	118	137	122	220	235	278	139	218	179	146	164	179	135	234	157	79	99	111	149	149	112	118	160	123	216	183	247	137	187	141	217	250	209	137	114	169	115	123	137	120	116	107	135	146	167
851859.HEL2	524	495	724	521	342	323	453	483	442	463	131	345	176	414	373	556	461	601	514	263	257	290	256	570	367	379	529	421	465	569	644	282	512	346	465	580	546	517	419	641	612	504	613	478	628	461	502	459	525
851860.CIA1	319	341	451	316	253	293	468	449	524	545	138	442	268	281	243	424	276	834	448	112	110	132	193	403	318	259	377	269	371	439	513	231	425	362	259	344	410	264	283	439	278	266	394	298	447	457	286	279	264
851861.MSW1	127	143	176	173	213	207	253	137	181	157	48	187	110	130	164	162	122	169	170	333	402	386	180	199	127	61	73	69	191	177	187	174	238	163	96	140	111	122	113	129	128	94	107	159	135	153	149	156	154
851862.CCC2	191	161	257	469	82	73	145	218	252	237	54	378	114	103	100	128	93	212	154	269	213	226	57	119	73	229	438	316	109	178	186	73	130	65	520	549	737	110	116	102	223	164	273	197	156	217	148	173	146
851865.GLO2	270	283	337	334	384	407	475	472	660	716	556	593	689	353	386	424	169	305	153	93	126	121	283	360	349	193	298	205	423	498	584	341	506	340	240	298	297	201	206	217	303	223	279	288	288	276	229	215	259
851866.DON1	34	41	51	26	11	20	24	36	63	53	23	71	26	27	25	45	57	103	61	30	32	34	4	18	8	30	39	21	59	47	102	4	16	14	17	17	23	14	11	16	24	23	34	18	18	12	67	52	71
851867.None	6	13	10	42	36	41	61	29	5	7	4	1	8	3	15	12	0	16	1	2	2	3	12	19	19	8	12	6	8	13	14	22	28	23	20	8	24	42	34	71	66	42	63	41	58	37	20	29	29
851868.BSC2	55	79	84	86	120	118	124	114	142	181	37	78	73	137	118	153	82	102	71	9	15	18	73	76	76	64	87	63	115	82	144	117	159	122	57	75	77	106	98	116	108	104	133	99	107	103	122	126	128
851869.PMP3	2359	2494	2290	2905	2336	2675	2090	1984	2535	2410	1366	2021	1255	2843	2585	2948	1654	2898	1365	230	238	306	2018	1783	1502	1903	1898	1643	2626	2033	2754	2387	3003	2199	3157	3021	2752	2117	2049	1997	3562	2942	2717	2700	2465	2089	2066	1963	1943
851870.MTH1	62	69	98	130	240	215	351	243	209	225	6	367	49	39	26	38	97	173	140	35	35	34	24	34	27	14	38	16	18	34	54	39	70	43	12	28	36	73	63	75	283	207	311	36	235	42	394	358	388
851872.None	0	2	0	0	3	0	0	0	0	0	0	0	0	0	0	0	0	0	0	0	0	0	0	0	0	4	2	0	0	1	1	0	0	0	0	0	0	2	0	0	0	0	1	0	0	0	0	0	0
851873.RNH202	211	197	321	252	241	203	284	111	59	65	36	50	36	207	201	257	73	154	94	27	34	29	154	294	228	189	217	184	165	198	227	173	281	210	238	258	257	207	171	237	180	177	208	219	224	196	50	69	68
851874.RRP45	549	543	910	691	430	453	713	688	564	529	255	445	411	334	300	490	446	1267	735	378	419	395	294	588	418	354	578	492	375	688	590	298	546	415	461	580	654	522	381	759	512	479	660	488	877	595	427	437	413
851875.PHM6	62	64	67	55	53	41	40	18	10	10	4	6	9	33	25	40	8	10	9	6	4	5	26	25	12	24	46	32	18	35	26	14	18	16	32	28	42	22	23	41	24	21	15	33	38	39	8	5	10
851876.MRX10	122	102	155	106	93	108	117	249	267	275	66	232	120	74	90	141	152	221	168	389	374	472	107	161	104	60	68	62	163	122	207	80	147	94	98	110	96	69	106	75	84	66	75	140	134	149	189	208	156
851877.GCN2	236	162	262	215	130	149	183	357	395	399	101	375	169	162	161	231	237	399	325	1798	1921	2039	91	220	140	228	334	251	168	216	256	87	151	126	173	209	199	177	159	252	274	187	237	159	211	203	357	309	328
851878.DPP1	354	367	404	335	333	289	351	476	541	620	436	484	594	456	434	518	221	269	245	297	321	347	403	320	275	266	272	214	448	330	541	334	547	365	278	360	307	231	359	217	477	375	415	611	510	607	375	405	355
851879.ZIP1	102	107	129	83	86	84	109	94	74	121	41	92	62	95	82	103	38	47	51	42	37	38	75	163	96	62	81	69	86	78	99	60	81	60	69	126	85	77	56	77	48	47	35	54	46	46	63	52	60
851880.None	127	146	180	175	233	235	231	176	297	180	168	241	194	108	93	123	146	260	153	364	375	319	136	226	223	65	67	59	213	149	207	160	257	213	73	82	105	78	110	100	132	118	126	151	158	117	216	207	218
851881.INM2	118	111	152	171	118	131	151	131	161	199	69	197	104	181	168	233	53	108	91	108	118	155	118	153	131	75	116	69	139	196	162	137	221	187	114	139	141	141	98	214	136	123	175	129	154	152	123	170	125
851882.NSE3	301	268	382	253	308	311	339	175	227	235	172	215	212	180	171	276	114	183	130	360	403	383	277	532	395	199	227	180	542	334	785	265	465	383	209	269	290	278	211	372	276	226	262	209	259	246	160	210	203
851884.RTT103	260	232	345	206	169	157	267	262	329	294	123	331	180	177	193	257	267	342	344	146	153	174	144	315	208	230	267	227	158	208	223	120	208	136	216	258	270	232	189	313	240	204	242	264	310	261	270	294	312
851885.HRQ1	218	201	356	233	175	143	265	191	299	265	100	290	185	171	177	257	123	306	189	48	76	83	125	279	226	199	313	211	233	314	350	114	222	166	168	253	262	188	163	254	253	196	274	211	274	259	155	136	152
851886.SRP101	570	604	739	623	468	435	664	609	693	640	220	558	319	545	516	747	519	801	622	636	683	666	370	679	504	625	811	674	493	851	649	353	594	447	539	819	663	526	463	736	584	558	679	634	899	673	471	474	432
851887.SSD1	1203	1070	1602	1177	514	408	836	945	1199	1340	102	1582	321	1897	2071	3127	791	1817	1162	88	63	89	380	769	543	1299	2197	1600	952	1470	1415	705	1188	930	1148	1911	1563	1174	970	1605	1484	1229	1646	1096	909	1179	1234	1282	1261
851888.DPL1	502	415	663	518	422	384	593	452	865	856	584	810	721	674	655	985	299	817	465	663	729	725	498	569	597	350	551	403	812	731	1226	659	1140	899	418	572	512	333	365	455	476	371	513	489	473	622	488	534	472
851889.HDA2	223	156	193	155	148	95	143	238	136	159	68	137	96	195	178	242	119	109	109	126	109	128	119	238	154	178	235	176	172	160	215	106	175	114	188	282	192	209	113	188	213	187	217	125	178	141	133	153	150
851890.MHR1	253	316	389	328	300	329	401	600	575	571	112	678	198	241	235	287	697	1620	833	665	686	869	220	287	261	140	203	172	251	334	367	248	326	320	202	316	237	214	239	300	346	308	377	333	386	389	511	498	497
851891.SUR2	633	600	713	517	537	525	654	495	531	491	657	518	828	339	338	478	219	257	224	22	18	26	517	689	561	448	567	485	428	704	522	587	938	721	364	562	468	640	526	704	715	498	607	630	982	619	527	532	513
851892.ATP5	1163	1242	1402	1231	1383	1310	1597	1356	1966	2137	805	1761	1163	1015	945	1272	881	1148	917	640	589	703	1401	1461	1213	535	596	475	1869	1463	2111	1766	2675	1971	773	1016	793	722	1001	869	1251	1024	1162	1596	1372	1465	694	646	717
851893.BFR2	895	913	1050	816	528	455	680	660	443	433	160	397	242	394	375	487	688	948	907	228	184	213	345	711	489	735	795	643	790	968	974	289	481	363	900	1270	1077	971	647	1165	1051	862	881	687	1185	617	498	550	507
851894.PRO1	499	566	687	541	448	416	640	465	486	496	211	478	278	404	359	529	527	1191	748	166	190	225	292	406	386	383	513	415	421	602	499	229	426	287	532	625	635	575	494	807	617	478	615	435	697	475	456	530	463
851895.CFT1	205	190	298	186	103	136	195	267	248	253	68	231	113	158	165	247	184	360	204	537	589	607	119	214	165	202	258	224	134	212	196	112	234	140	149	151	205	156	185	220	218	178	288	167	209	240	201	253	218
851896.GPI11	229	223	263	197	290	294	330	252	327	265	359	337	331	155	152	196	180	266	201	219	225	264	322	202	243	153	146	142	244	173	320	218	257	207	180	165	161	207	150	197	248	186	162	191	231	163	342	310	287
851897.RSC3	378	357	419	313	229	237	316	430	433	462	186	356	250	325	314	390	288	399	388	36	47	78	294	515	346	293	393	326	435	370	510	187	349	206	290	484	395	279	263	317	443	379	416	367	409	358	312	268	322
851898.CPR5	892	945	995	973	1376	1278	1240	1049	1297	1380	1463	1299	1498	929	852	865	676	995	704	291	276	331	1349	1188	1071	660	696	620	1359	1117	1427	1067	1258	1045	789	920	786	786	815	781	835	755	715	1009	1071	875	1077	1087	977
851899.HNT2	185	219	200	156	172	184	198	235	294	270	184	246	209	167	156	180	150	77	123	205	201	211	135	189	185	142	129	134	228	212	268	150	243	137	190	189	147	198	140	159	182	164	127	167	191	145	199	192	188
851900.None	187	184	222	196	190	135	179	195	245	254	84	251	130	237	185	328	143	231	201	168	186	197	199	276	191	158	211	139	325	262	451	241	308	248	160	300	195	161	124	192	208	180	205	135	144	139	250	304	257
851902.PMT7	199	198	329	205	146	122	214	306	312	392	191	293	283	186	167	265	178	428	239	103	117	122	160	224	204	177	301	223	249	285	321	141	302	208	181	309	257	170	140	231	165	169	211	172	185	223	184	214	146
851903.SRB7	257	246	278	207	274	275	286	301	318	315	238	252	324	162	144	178	129	230	152	43	40	33	184	326	215	169	160	162	132	142	172	138	227	190	178	161	203	262	223	242	181	196	164	222	288	221	160	204	173
851904.GIC2	178	179	269	233	338	323	355	186	78	100	30	107	53	131	142	198	105	102	115	9	13	11	181	306	252	184	214	164	118	196	166	55	105	93	143	268	193	196	140	271	278	208	222	105	128	117	188	188	175
851905.SUM1	503	575	716	491	322	252	458	686	524	549	153	458	181	404	482	653	455	932	662	42	43	51	203	425	263	579	851	605	339	619	443	229	386	273	519	623	692	455	517	597	588	486	602	578	841	699	517	463	549
851906.TFB1	266	233	306	231	193	156	223	374	370	396	146	328	227	156	168	226	233	447	341	282	228	229	103	278	190	189	240	208	262	240	256	157	280	185	185	278	226	248	213	277	224	220	286	278	255	274	346	348	310
851907.SSF2	323	304	385	264	276	301	329	375	276	295	126	243	160	153	170	188	444	724	643	54	74	60	161	216	173	244	271	232	228	257	239	168	243	165	252	372	292	363	260	392	390	324	352	217	411	204	255	272	275
851908.PIB1	103	80	128	100	99	103	155	106	152	148	40	160	62	74	95	149	111	231	147	28	32	49	128	193	137	72	93	80	163	141	215	125	213	111	58	87	102	78	81	92	88	75	97	109	121	123	131	132	123
851909.RAD34	74	74	89	69	47	61	90	98	72	106	36	57	50	52	54	104	25	62	41	18	16	17	30	77	48	48	41	46	51	66	40	53	99	66	49	63	72	55	43	53	65	47	74	53	90	54	30	51	32
851910.IPK1	96	89	107	148	110	128	138	62	115	155	103	140	100	134	101	156	164	151	187	95	122	110	114	220	177	56	98	89	162	73	172	156	251	183	84	100	93	77	87	73	105	92	113	89	95	90	229	263	245
851911.OMS1	233	246	275	209	230	234	301	251	261	269	73	325	95	205	233	256	314	581	345	21	21	13	104	244	181	164	157	121	128	161	160	166	292	222	149	210	187	137	165	209	302	252	275	259	244	234	151	206	196
851914.None	16	16	24	76	56	41	50	3	1	7	0	0	0	14	19	28	0	0	0	0	0	0	20	73	47	0	0	0	47	75	63	4	3	8	0	0	0	2	1	0	0	0	0	80	90	80	0	0	2
851913.None	0	0	0	0	0	0	0	0	0	0	0	0	0	0	0	0	0	0	0	0	0	0	0	0	0	0	0	0	0	0	0	0	0	0	0	0	0	0	0	0	0	0	0	0	0	0	0	0	0
851915.HIM1	43	51	89	59	55	46	90	80	90	92	50	69	59	54	48	98	59	66	72	146	143	175	37	60	45	32	60	43	66	66	85	69	122	98	32	56	50	42	31	67	59	44	31	41	68	48	69	101	90
851916.MCM21	150	131	167	120	142	129	162	101	92	118	102	140	125	127	87	149	100	86	120	158	134	171	87	211	139	94	153	124	165	126	219	127	168	115	92	128	121	108	89	78	104	127	113	112	130	91	150	172	142
851917.YFT2	320	288	359	389	359	371	413	229	325	312	363	420	413	320	295	391	155	268	168	248	248	280	439	493	421	263	362	276	312	372	344	508	763	498	391	462	481	424	246	402	281	217	225	219	250	238	207	228	226
851918.SWA2	207	213	238	191	140	175	168	150	190	177	102	169	116	203	222	240	136	236	169	103	90	103	126	268	217	174	285	201	177	239	215	149	221	153	163	170	178	165	170	231	181	201	199	178	167	173	201	246	262
851919.DAD4	287	372	292	315	361	608	370	340	527	436	704	545	481	286	183	238	369	619	291	671	734	895	574	499	411	192	208	130	599	324	645	470	570	459	245	202	244	241	208	247	256	150	149	237	205	172	530	517	483
851920.ASP1	1002	907	1260	1121	921	1009	1400	672	811	751	329	675	485	676	678	997	804	1481	1035	1257	1238	1193	1280	1099	1132	789	1161	932	1462	1146	2048	681	1313	937	860	1010	1086	1081	786	1426	1056	948	1192	705	1119	762	879	835	824
851921.MRPL35	348	319	385	295	341	341	445	570	481	645	189	605	299	265	290	387	534	533	652	187	159	214	225	335	224	193	228	214	294	302	388	273	386	312	187	280	224	200	275	261	345	327	293	365	403	345	305	352	335
851922.TIM11	866	1050	1114	712	879	1163	1041	1026	1044	1096	783	771	755	705	656	815	643	426	568	505	427	499	687	768	694	299	308	256	745	774	847	1056	1496	1181	371	409	461	636	746	666	808	726	862	894	805	887	609	584	556
851923.PEP7	93	86	112	111	61	77	92	103	101	95	68	106	73	76	72	80	111	67	99	781	904	991	57	91	68	63	71	67	121	88	177	77	128	92	76	139	114	88	54	101	79	69	74	78	79	62	133	149	141
851924.UTP4	1218	1208	1541	1123	924	915	1215	1077	768	764	156	630	330	707	660	939	1150	2519	1684	940	939	1139	464	1052	718	1045	1257	1019	807	1261	965	416	758	561	1056	1296	1325	1497	1100	2060	1394	1188	1461	1029	1844	1105	798	835	761
851925.YCG1	194	182	291	226	136	155	219	232	211	189	62	230	102	130	125	200	128	255	210	60	56	34	99	277	178	220	270	212	166	224	295	121	226	139	191	230	197	233	186	277	205	168	216	171	252	182	198	167	190
851926.YSP2	531	426	632	430	400	407	548	604	1002	931	646	813	897	295	265	380	390	817	503	724	750	855	300	764	523	355	542	430	480	447	659	256	486	318	316	450	465	360	296	515	504	377	556	244	432	286	656	717	717
851928.SKP1	951	824	1390	1395	839	843	1284	825	1046	1133	492	825	734	1015	976	1595	561	1050	612	781	807	967	1036	1033	1101	945	1487	1201	1320	1782	2212	913	1711	1329	1037	1336	1642	903	777	1423	918	727	1160	971	1260	1173	773	766	778
851929.PEX3	251	241	324	244	237	198	298	255	318	342	155	466	210	262	272	412	197	554	302	101	107	115	230	319	239	185	264	212	445	366	587	206	311	297	214	332	304	213	180	239	245	225	256	248	287	232	362	316	330
851930.UBX5	197	166	299	194	107	112	168	251	235	255	59	205	90	149	155	244	127	215	168	24	38	27	80	192	145	131	238	199	160	244	243	82	143	101	134	188	217	154	128	212	186	159	203	164	192	214	159	169	180
851931.GPI8	270	269	376	321	287	314	378	516	555	610	790	649	1000	245	264	355	369	424	426	60	63	73	263	383	273	228	294	209	301	311	426	276	423	339	245	269	285	306	230	321	274	239	294	213	307	246	376	440	393
851932.IRC3	204	186	278	182	146	157	189	139	143	179	92	147	114	148	153	199	104	187	126	554	48	32	114	259	157	124	174	133	211	196	260	156	268	223	111	188	170	133	114	163	155	146	172	150	170	144	131	133	101
851933.RQC1	347	376	525	399	270	231	339	326	288	325	136	276	199	263	282	393	328	460	402	104	109	115	227	468	357	348	510	378	478	489	674	223	446	321	318	496	473	434	299	522	403	368	476	302	451	387	301	325	295
851934.SWR1	373	316	477	314	247	196	333	410	348	398	78	294	144	246	227	378	265	557	334	1410	1440	1459	144	308	203	289	454	303	264	420	397	130	245	168	266	390	327	245	288	315	361	296	360	452	504	456	398	437	366
851935.MSN5	504	462	676	549	278	228	440	477	549	581	124	635	288	647	571	836	260	455	358	115	117	133	272	524	366	657	858	670	498	618	705	321	500	384	559	735	709	435	415	583	473	383	575	462	511	488	440	435	466
851936.MRX8	121	149	177	128	176	173	202	165	159	195	101	77	134	78	92	83	75	34	75	81	84	112	137	197	153	101	111	87	172	127	219	140	180	138	91	101	111	103	120	129	133	112	125	119	137	97	71	69	75
851937.MRPS28	337	370	454	307	420	433	496	475	511	510	186	586	325	227	200	287	628	644	626	123	101	125	264	389	309	116	164	134	250	304	312	267	461	306	153	266	248	172	265	230	329	297	332	412	454	413	336	375	373
851938.None	155	145	226	147	102	107	201	214	230	221	77	137	94	138	139	238	89	190	145	27	56	38	82	119	107	113	171	155	142	185	183	144	270	198	104	150	123	113	104	191	171	127	174	101	143	137	123	125	134
851939.FCF1	756	769	920	760	825	854	971	734	655	697	646	647	686	428	422	593	880	890	933	838	941	967	610	841	654	467	586	468	649	674	835	503	770	605	554	580	675	977	661	1153	884	833	792	583	852	525	761	800	852
851942.RRS1	2016	1913	2412	1847	1487	1218	1814	1784	1629	1789	431	1232	736	1327	1356	1808	1678	3152	1966	734	762	848	1000	1211	876	1983	2555	2018	1489	1817	1870	1031	1648	1111	1727	2517	2160	2657	1863	3006	2465	2126	2333	1687	2481	1696	1307	1296	1321
851943.HXT7	107	78	102	133	280	289	330	3283	3400	3828	240	2761	828	27	17	10	1108	1499	1336	58	45	54	1	0	2	43	55	48	3	4	11	68	135	131	18	19	15	97	294	91	69	26	57	806	738	751	2727	2994	2937
851944.HXT6	69	64	59	9	40	29	40	37	31	25	11	336	142	29	31	44	26	29	25	9	14	18	3	8	10	49	73	52	17	19	27	19	35	11	14	27	14	11	11	10	245	157	201	81	70	62	164	188	171
851945.None	20	25	26	26	53	41	34	5	4	5	0	0	1	23	12	33	1	6	3	0	0	0	11	22	12	38	49	28	25	23	19	53	78	64	14	11	22	13	26	21	20	13	14	23	38	34	0	0	0
851946.HXT3	3619	3344	5152	5624	6449	5934	9353	9702	11020	12369	1904	11706	4488	2924	2966	4772	7484	17134	11376	2405	2462	2675	1260	1760	1330	1054	1487	1205	1530	7982	2492	2535	4888	3554	2517	3695	3494	10167	5576	14407	9057	7668	10572	3557	13429	4162	6521	6846	6782
851947.SVF1	1194	1206	1707	1492	1107	998	1574	1454	1233	1260	605	1220	820	940	847	1350	1167	2696	1743	374	347	361	664	1227	1053	1221	1633	1331	969	1130	1388	703	1302	1009	1126	1241	1491	1492	1149	1899	1409	1187	1550	1111	1661	1340	1272	1279	1237
851948.MRP1	612	632	932	649	801	888	1191	442	512	545	97	602	197	316	315	503	772	1108	873	270	256	298	434	739	668	248	410	335	492	532	596	465	886	673	308	376	425	427	440	528	654	601	788	583	662	643	341	381	415
851949.PAL1	492	504	802	547	321	303	469	528	387	375	83	501	160	455	424	693	321	659	435	38	16	30	251	412	393	479	709	555	376	691	587	248	463	359	404	779	619	468	446	590	570	499	614	579	954	726	366	377	373
851950.YPS7	725	618	890	638	524	458	753	657	732	797	377	737	639	573	501	758	470	1116	666	250	287	315	383	809	610	579	793	599	663	873	1016	424	970	627	462	572	677	655	504	948	770	584	810	590	761	669	558	546	541
851952.ATP22	214	160	205	211	106	101	146	206	257	240	141	319	168	259	230	343	104	114	133	56	40	57	101	228	160	149	176	131	255	185	352	161	257	210	159	252	209	190	161	221	186	210	197	181	184	186	173	179	188
851953.SBE2	340	330	445	274	230	193	311	261	213	247	66	201	123	306	304	407	163	277	290	96	81	106	154	304	183	234	326	251	277	350	392	136	218	170	243	324	327	344	258	437	375	339	392	269	356	294	225	281	219
851954.YPQ2	368	364	530	389	292	334	448	594	606	577	539	579	702	310	297	439	370	872	514	432	407	475	274	301	274	245	296	256	252	445	360	306	489	363	351	452	451	369	242	426	270	279	342	351	479	367	379	416	391
851955.TRR1	1792	1826	2420	2455	1472	1410	2183	1243	1303	1349	501	1277	715	1675	1531	2434	1066	2267	1248	451	477	567	1255	1321	1298	2241	2965	2395	1274	2241	1861	1282	2057	1511	2053	2526	2601	1718	1640	2366	1725	1474	1879	1986	2326	2242	1081	1213	1216
851956.TRP4	318	318	417	389	248	200	376	323	358	347	100	305	161	264	271	356	194	539	251	75	91	80	216	254	216	362	543	422	336	395	509	207	342	230	273	477	386	312	325	447	411	324	382	325	534	424	370	386	352
851957.SPC110	156	117	188	146	104	102	109	169	178	181	91	172	144	129	102	137	98	149	166	90	85	85	109	234	157	155	176	172	167	116	226	91	132	127	112	142	144	124	111	171	146	155	179	122	135	146	160	144	162
851959.CNL1	161	173	175	304	170	205	230	70	107	94	119	134	90	152	117	204	55	26	26	157	140	144	187	221	205	120	140	105	353	181	332	226	310	249	148	147	148	145	103	122	124	148	123	152	129	136	100	85	74
851960.GGA1	92	104	132	144	73	64	88	215	177	188	82	174	122	262	278	400	70	135	85	30	21	22	77	132	128	151	161	123	194	160	219	137	171	182	173	312	184	86	95	93	114	97	99	93	91	97	219	172	211
851962.EAF1	309	248	448	276	177	113	289	297	229	275	29	188	82	218	191	327	123	266	178	15	28	25	64	168	136	243	345	305	117	325	193	121	223	170	208	229	308	251	188	408	308	230	359	257	319	307	213	175	157
851963.BCP1	826	882	1120	868	885	867	1142	670	657	624	317	416	396	474	408	602	828	1660	1052	1151	1145	1253	711	949	741	669	811	713	1163	834	1659	515	692	563	688	721	860	958	705	1141	901	754	910	576	1097	647	462	486	448
851964.TFC6	210	259	329	292	144	153	293	326	300	335	109	329	172	166	180	296	178	454	269	91	71	88	130	273	215	182	291	221	225	318	343	129	245	157	190	278	257	179	187	258	274	219	262	217	312	290	219	200	224
851965.ESC2	209	201	280	207	161	142	204	243	228	261	94	229	169	152	172	282	160	423	274	22	12	24	66	162	161	154	248	202	86	189	136	94	185	132	181	234	225	203	189	282	223	139	223	158	256	202	149	180	167
851967.SEM1	916	992	870	889	1022	1247	897	490	654	569	675	564	553	893	761	851	470	540	477	112	108	110	1168	1303	1020	790	675	569	986	558	985	882	1006	736	982	701	819	822	826	819	828	734	522	940	793	727	440	505	485
851968.CDC40	295	304	419	295	244	219	332	226	238	215	123	268	205	173	200	298	214	310	260	184	180	166	189	434	292	174	273	204	334	310	450	215	386	249	249	277	273	248	226	344	310	228	291	243	330	284	261	228	251
851969.ESF1	1082	1113	1555	1043	703	761	991	1233	810	814	268	636	363	497	555	754	928	2573	1475	286	323	297	349	914	598	1009	1387	1026	618	1073	770	422	806	610	819	1117	1158	1341	880	1716	1230	1019	1326	700	1707	812	738	770	734
851971.None	12	8	13	5	65	64	129	6	2	3	0	0	0	0	0	0	1	2	2	0	0	0	4	3	3	0	2	1	48	45	45	0	1	0	0	0	0	0	0	0	0	0	0	0	0	0	0	2	1
851970.None	0	0	0	0	0	0	0	0	0	0	0	0	0	0	0	0	0	0	0	0	0	0	0	0	0	0	0	0	0	0	0	0	0	0	0	0	0	0	0	0	0	0	0	0	0	0	0	0	0
851972.None	1	5	2	2	0	6	1	4	5	7	12	7	12	3	7	6	6	0	8	0	5	1	2	2	3	7	2	5	27	1	16	8	6	3	1	1	4	2	1	0	1	1	4	1	6	8	5	1	1
851973.KEI1	527	498	644	615	771	976	964	599	835	777	952	681	1037	369	314	419	367	425	425	910	950	1040	720	876	693	245	376	273	749	583	1035	682	1085	711	399	496	560	544	383	589	495	533	582	460	464	378	660	595	617
851974.YPR1	413	371	445	485	360	359	493	430	496	542	251	664	387	567	548	792	396	675	483	70	63	82	546	588	539	300	347	315	785	676	760	439	756	533	449	551	511	460	394	482	565	459	548	501	454	505	652	624	660
851975.XRS2	87	87	150	163	113	115	156	200	232	217	76	113	134	139	145	233	102	213	139	215	228	271	82	241	153	80	159	120	97	149	164	124	231	168	111	119	170	121	101	161	110	77	115	100	147	131	137	136	172
851976.DXO1	308	301	310	210	269	300	260	367	345	386	212	364	339	158	150	179	285	469	355	49	58	61	186	366	237	184	181	175	369	195	405	187	218	185	184	241	201	260	206	212	299	215	219	214	267	184	303	314	353
851977.CTS2	233	238	360	163	141	159	216	165	224	209	101	212	161	146	140	229	110	245	139	176	197	185	149	311	205	145	203	176	209	183	312	186	276	211	95	188	125	163	134	179	152	126	163	157	149	149	174	224	185
851978.VPS74	1024	1034	1368	1285	919	866	1289	1018	1167	1262	916	1033	1037	1288	1203	1732	784	839	951	513	513	567	964	1749	1281	1355	1526	1234	1417	1219	1726	1055	1720	1205	1150	1550	1556	1131	937	1371	1071	981	1111	1017	1391	1175	1158	1143	1087
851979.FRQ1	382	377	389	390	482	496	544	374	509	396	329	434	432	286	211	283	267	502	309	140	135	122	459	494	418	317	324	270	482	300	557	345	540	335	285	282	296	239	266	271	331	293	319	281	339	254	353	361	359
851980.PHO92	11	5	9	25	11	12	9	28	58	34	17	30	39	5	3	5	34	52	35	57	44	57	14	8	9	0	1	2	2	2	2	7	4	5	0	2	2	25	10	25	4	4	2	1	3	2	55	57	37
3799971.WIP1	152	199	211	233	190	196	182	153	241	235	119	205	221	164	129	164	44	138	77	210	214	224	419	295	339	91	120	93	230	163	272	294	378	312	151	119	130	129	138	174	152	183	182	143	106	133	241	221	231
851981.BCS1	277	265	381	266	259	285	394	377	378	372	194	497	262	180	217	322	336	738	441	143	134	143	242	349	277	135	229	152	267	280	406	228	397	285	184	237	248	173	198	239	264	266	345	283	361	332	253	276	284
851982.ARH1	166	157	208	172	188	131	176	209	221	228	66	353	134	194	163	211	275	484	349	389	401	518	135	216	139	132	138	124	213	173	242	159	222	183	167	192	160	110	143	133	193	193	154	202	176	211	282	267	313
851983.ATP17	812	977	965	876	1052	1205	1225	1366	1924	1971	1250	1867	1356	797	684	887	698	1827	830	532	556	562	1564	1349	1178	372	432	316	1261	1004	1484	1648	2335	1640	514	659	648	518	810	639	854	933	931	1070	1021	1068	866	858	843
851984.LSM6	769	843	849	793	972	1161	967	796	734	782	789	592	898	575	549	695	345	1096	467	232	242	311	1623	1411	1383	653	640	532	943	819	1060	1146	1380	1038	745	612	708	807	696	946	957	780	675	633	701	656	445	452	422
851985.RGA2	202	190	229	211	143	148	171	198	210	222	63	268	99	229	223	283	200	353	269	212	192	233	118	228	180	216	278	221	184	237	220	97	159	139	176	312	250	184	151	256	248	218	232	174	229	169	258	300	258
851986.SDH6	100	107	99	134	68	60	57	129	210	176	198	155	169	98	91	134	48	47	50	164	175	152	144	210	136	86	97	87	275	169	295	88	144	88	117	84	96	70	34	67	50	43	33	44	26	40	420	452	420
851987.ARO10	493	496	682	315	292	237	318	334	359	335	148	413	252	153	119	152	206	408	340	76	62	76	265	462	304	276	368	296	793	1210	956	183	300	202	240	445	352	116	88	134	145	128	167	108	107	125	695	656	725
851988.YRA1	1874	2006	2324	2221	2113	2181	2488	3226	3881	4132	2362	3121	3241	1699	1660	2112	2468	3320	2563	1062	966	1208	1690	1983	1796	1967	2545	2123	3209	2017	4004	1671	2530	1835	1952	2658	2332	1934	1906	2267	1938	1690	1836	2325	2832	2507	2336	2490	2464
851989.None	271	261	259	188	211	236	193	196	245	225	111	228	170	237	179	230	152	225	142	49	58	54	312	384	354	89	102	96	305	207	325	158	269	195	123	104	137	157	161	182	207	215	208	186	162	154	145	124	125
851990.RPP2B	17152	17824	16481	16733	22602	25793	21850	15418	21919	21624	31444	17960	27629	12585	12090	13696	12497	7596	11195	38955	39459	45718	18761	16142	14511	13356	12730	10883	21207	15553	22224	25761	31252	22752	15003	12634	13759	19304	18343	18873	17438	15419	13505	21204	20254	17197	19129	20135	19583
851991.NKP1	156	159	116	141	113	123	154	101	65	72	82	81	71	124	108	147	44	87	64	55	70	65	106	185	115	66	94	77	117	114	149	118	194	133	74	102	122	123	68	135	74	96	97	86	81	96	65	58	62
851992.ATO3	274	271	409	307	324	286	383	357	267	254	172	247	210	158	122	232	677	2059	993	58	55	52	95	146	162	350	504	397	120	317	184	128	229	182	244	227	328	344	238	467	322	283	365	206	367	243	419	465	422
851993.EFT2	9965	8908	12181	10475	7534	5768	9316	5253	4299	4795	915	4841	1670	8864	9977	12804	6938	9348	8404	1661	1773	1881	4095	3772	3283	11664	14222	11769	3993	9698	5063	3883	5962	4424	10432	13986	13167	10277	9056	12741	11026	9436	11131	8979	11327	9521	6060	6372	6132
851994.MUS81	92	102	145	112	85	59	101	129	174	130	86	127	86	85	84	145	126	152	152	163	132	156	87	143	104	105	93	81	122	106	184	76	133	103	83	111	99	59	70	89	95	87	99	111	109	108	176	145	134
851995.CIN10	178	183	289	177	143	114	206	251	279	303	145	261	197	250	289	394	118	250	165	91	69	91	189	246	185	143	234	194	364	316	494	278	527	393	182	341	205	165	167	208	172	150	226	196	243	232	185	174	163
851996.RVS167	764	807	1249	1092	527	396	824	996	996	1061	114	1228	261	1145	1031	1664	660	2795	1089	1355	1237	1332	569	598	573	761	1298	957	930	2017	1247	691	1259	832	942	1451	1382	820	711	1166	781	654	924	805	997	995	1041	1033	1057
851997.SAC7	270	266	422	357	249	193	330	356	350	435	67	378	156	322	296	455	203	651	346	67	61	59	154	414	273	269	548	408	257	432	488	144	360	228	240	387	382	310	197	375	306	270	390	166	331	257	286	304	317
851998.UBA2	389	386	427	361	242	238	306	470	432	458	142	408	260	399	336	448	317	548	414	60	66	76	214	352	236	373	413	339	450	475	492	219	294	214	407	490	383	410	329	470	452	368	399	300	381	298	342	328	311
852000.None	552	620	618	430	320	287	349	281	438	541	564	633	488	621	596	638	280	297	310	154	177	197	795	735	656	567	581	496	538	525	588	601	785	600	399	412	438	1120	744	1247	184	198	188	284	233	311	579	624	597
852001.SPT3	197	167	277	203	122	123	181	266	278	301	99	250	131	165	149	277	160	327	187	521	440	549	171	318	222	166	286	220	197	261	233	115	140	102	169	285	250	185	114	222	243	176	190	140	169	157	282	257	289
852002.SHE9	219	200	334	233	232	202	301	205	177	168	175	153	187	155	140	170	109	205	123	86	125	110	125	306	252	97	140	104	255	183	373	154	275	228	125	175	190	153	138	202	206	170	193	250	251	199	109	103	128
852003.RPT3	963	1006	1368	1026	673	697	1006	1290	1380	1373	230	1298	473	958	1008	1417	604	1519	807	426	402	445	615	980	743	1010	1409	1105	937	1052	1373	487	861	675	899	1112	1132	753	831	973	924	833	969	1098	1250	1295	941	1045	941
852004.SXM1	1123	962	1448	1226	810	685	1090	1247	1088	1206	475	1212	707	838	870	1173	1227	1886	1665	466	435	481	523	928	638	1136	1542	1213	834	1258	1145	577	934	719	1139	1455	1447	1302	1033	1708	1116	937	1172	1070	1544	1290	1008	1029	1059
852006.NCB2	740	888	1056	733	628	766	747	834	816	762	492	733	619	558	518	762	569	1160	545	71	60	63	823	1017	861	520	655	457	790	844	954	437	789	608	637	765	839	739	572	838	707	627	653	647	798	597	508	426	513
852007.UTP5	1395	1346	1991	1500	985	913	1407	1220	911	934	225	822	344	854	802	1263	1443	2653	2054	179	190	202	450	787	674	1080	1624	1182	647	1744	1010	540	986	699	1250	1657	1708	1638	1247	2223	1597	1367	1717	1100	2305	1392	1022	997	984
852008.HPT1	2825	3109	3621	3265	3002	3107	3735	2508	2312	2036	1596	2811	1839	1548	1498	1946	3866	3810	4569	1088	1163	1333	1981	2355	2076	2683	3247	2642	1266	3433	1600	1737	2595	1986	2384	2989	3106	3329	2718	4066	3082	2766	2996	2994	4915	3105	2553	2737	2657
852009.URH1	333	304	364	299	329	331	441	321	404	419	403	262	457	310	317	369	60	121	102	159	182	182	290	353	319	177	211	198	191	248	248	381	516	408	230	319	270	275	284	326	215	206	273	341	366	376	104	88	108
852011.DIT2	16	16	19	18	11	7	11	25	32	44	25	14	25	14	6	7	7	17	15	139	127	120	5	8	8	13	13	6	14	3	20	8	14	2	6	9	7	12	7	7	10	6	13	9	5	8	17	7	24
852012.DIT1	46	67	62	53	22	13	24	26	47	52	16	20	20	12	12	23	10	14	24	11	5	13	2	1	3	16	12	11	16	11	18	11	15	7	12	15	16	16	9	16	5	7	7	11	10	9	11	22	17
852013.RPB7	558	506	630	516	447	481	529	685	658	691	424	640	568	438	396	485	466	629	556	210	197	249	398	359	325	391	482	397	379	477	457	375	590	405	391	603	534	415	394	510	534	458	442	464	566	396	477	527	485
852014.MRP20	369	393	699	476	477	513	712	950	753	833	73	783	221	248	267	490	652	1975	920	25	14	37	175	329	258	224	311	242	278	448	384	234	498	308	295	529	436	305	334	374	537	450	615	396	649	518	465	458	473
852015.PDR15	169	153	207	132	60	77	146	379	339	397	77	436	168	111	100	181	99	238	190	77	87	104	54	86	78	92	147	106	105	140	170	169	336	283	103	135	154	84	131	107	115	94	195	231	409	262	302	325	297
852016.TRS120	269	242	326	302	197	217	332	279	249	267	97	277	125	267	259	390	134	259	178	258	270	319	152	423	283	237	376	284	358	316	487	163	311	228	256	393	323	238	187	334	300	236	324	169	217	248	215	212	219
852017.ADE8	1365	1355	2312	2058	1480	1491	2459	1461	1608	1598	683	1528	1179	1133	1113	1934	1059	3988	1670	2579	2775	3051	1493	1696	1821	1238	2098	1697	1039	2247	1768	1347	2832	2119	1435	1807	2169	1706	1267	2551	1575	1173	2005	1361	1838	1765	1333	1357	1364
852018.SIZ1	194	142	274	181	123	111	162	190	178	210	68	168	134	129	110	224	100	223	145	124	12	16	67	160	124	148	274	182	112	211	172	78	135	108	131	238	203	160	89	233	230	167	227	92	211	132	133	138	152
852019.STE14	67	69	84	190	329	316	318	115	104	123	147	110	128	86	44	53	91	84	86	52	89	99	294	183	174	78	74	62	116	84	138	98	106	73	75	91	81	125	76	141	72	72	81	93	88	82	107	95	113
852020.DFM1	235	229	371	323	246	233	345	336	387	425	305	385	407	298	312	403	192	401	227	102	134	144	281	293	319	262	446	313	278	426	425	205	399	258	237	418	317	191	192	279	228	171	222	292	377	268	337	336	327
852021.RRP17	584	724	748	629	573	637	871	523	450	387	379	477	426	334	280	461	700	1460	824	498	547	587	317	806	566	417	587	547	357	603	509	260	402	349	504	551	622	800	543	917	629	520	667	520	1008	555	626	614	583
852023.ERD1	211	208	236	180	144	170	172	107	101	116	100	126	133	193	161	204	101	123	88	82	77	73	175	250	166	158	188	201	204	141	222	151	207	152	170	147	159	171	148	144	211	227	216	164	187	156	92	129	127
852024.None	228	212	290	242	215	234	265	315	414	373	308	355	337	216	201	290	169	312	183	218	211	227	270	275	227	152	204	164	244	252	270	200	376	271	211	286	282	176	189	211	170	165	179	178	228	190	277	287	271
852025.SYF1	240	197	265	206	160	125	211	336	343	339	125	285	234	170	188	268	259	483	345	352	398	430	130	221	177	168	253	176	159	220	221	158	233	171	173	254	270	162	167	246	209	187	230	181	213	225	244	265	247
852026.RPL12B	9478	10075	10211	9606	11203	11720	11554	10050	11325	11229	11809	10272	12431	7352	6878	8093	9126	8047	8762	2218	2349	2459	9264	9662	8270	9310	9038	7860	4715	10047	4886	9539	12988	9378	9554	9289	9691	10026	8691	10292	9731	8781	8630	9926	11239	8983	8633	8721	8539
852028.RAD30	163	200	275	191	143	132	217	166	208	199	113	241	146	169	148	213	125	190	150	116	139	134	126	219	190	155	202	136	183	204	237	135	228	171	172	241	215	156	121	178	177	134	199	154	191	159	193	230	223
852030.HKR1	178	187	245	125	118	92	154	123	130	135	9	100	41	168	167	215	77	237	137	45	43	45	56	91	64	169	268	176	86	229	133	67	122	107	82	80	107	223	215	277	335	284	322	239	280	267	113	136	124
852031.ARO80	153	124	223	154	73	69	123	155	170	190	67	145	139	108	146	200	73	149	115	71	74	78	87	182	150	157	191	144	137	158	205	104	190	122	103	173	134	114	94	129	140	121	161	135	130	139	67	86	68
852032.SIP1	269	248	436	318	178	163	280	362	313	339	84	226	171	215	243	430	155	327	257	69	56	72	130	292	227	220	425	284	279	375	448	152	447	276	269	380	398	252	168	392	325	287	369	157	294	206	168	210	173
852033.CAD1	121	81	129	143	145	177	204	119	163	136	63	137	89	89	65	123	60	115	94	575	585	675	35	86	53	60	110	84	70	176	105	84	232	146	121	138	121	82	68	95	106	77	98	95	101	92	203	213	172
852034.DYN2	385	456	298	347	445	678	370	321	515	419	761	429	538	395	299	298	307	105	229	173	197	210	562	461	359	294	247	220	488	318	449	378	400	272	399	258	272	337	314	283	254	194	182	411	284	266	557	636	573
852035.SNX41	118	119	168	113	68	78	81	128	139	170	36	143	62	103	160	180	59	87	82	16	17	9	45	129	76	111	114	99	114	120	160	66	108	85	113	167	148	82	52	97	96	97	122	91	107	87	109	106	119
852037.RPN9	799	779	893	692	701	668	765	1023	1206	1240	739	1229	954	816	740	788	630	416	646	201	182	194	622	735	573	759	763	617	982	538	1052	439	551	438	672	845	756	724	654	640	665	697	666	769	706	739	830	918	853
852038.BNA7	259	253	295	312	333	300	381	300	346	356	216	227	297	179	189	236	152	209	148	98	91	127	197	253	228	251	241	196	196	239	224	283	444	305	236	258	281	294	249	358	278	222	223	236	289	230	155	177	159
852039.TIF35	2128	2231	2922	2680	2248	2413	3036	2433	2865	2735	1460	2661	1878	1834	1682	2305	2426	5800	3290	2064	2071	2299	1722	2527	2138	1984	2450	1992	2134	2789	2772	1733	2845	2043	2159	2603	2729	2639	2187	3168	2326	1928	2299	2339	3335	2639	2481	2485	2538
852041.CYM1	373	326	585	318	279	236	380	516	512	491	71	736	158	272	250	412	526	1285	806	829	812	1005	171	280	246	203	335	255	273	325	387	213	343	286	213	340	300	238	252	280	406	322	426	397	414	452	624	629	616
852042.NPL3	2147	1869	3062	2192	1298	1089	2159	2369	1936	2156	190	1398	549	1711	1729	2770	1365	5371	2138	48	41	40	797	1103	930	1793	2987	2273	930	2818	1427	874	1704	1228	1741	2690	2526	1828	1741	2688	2234	1794	2524	2206	3423	2836	1633	1643	1672
852044.GPI17	387	360	489	464	289	267	391	492	500	526	358	538	507	337	300	463	278	480	378	229	225	309	344	523	424	334	401	317	361	392	474	300	490	364	350	474	398	357	286	388	397	290	438	360	423	346	397	423	386
852045.PPM1	168	148	221	334	147	151	207	127	202	194	96	330	165	332	362	477	110	209	117	166	185	208	166	244	251	216	317	266	251	302	381	251	401	286	246	381	331	172	147	226	167	134	203	169	197	181	279	274	244
852046.PPZ2	149	156	222	136	77	69	114	309	304	369	66	359	161	187	212	287	115	336	185	98	119	153	87	123	106	115	203	174	151	195	224	106	201	152	107	172	148	90	92	162	141	113	170	112	100	98	188	197	194
852047.GPI19	39	24	46	33	29	21	31	45	45	62	6	42	24	25	36	70	35	44	42	17	25	35	10	24	28	20	44	23	42	43	56	28	75	41	22	40	40	21	15	40	19	27	56	26	48	28	51	37	40
852048.THI74	97	97	168	100	84	74	119	169	178	216	58	181	91	110	109	162	74	114	113	150	143	144	93	119	107	92	134	129	96	141	173	72	129	102	62	119	118	89	69	119	90	81	112	77	93	95	106	115	132
852049.LRS4	146	157	192	122	109	114	152	92	107	92	40	98	48	103	113	132	97	268	128	8	7	8	71	157	146	97	142	101	155	145	182	65	132	109	136	179	154	128	101	149	117	150	141	114	136	145	109	117	98
852050.DOT1	192	184	239	153	127	108	155	196	174	235	69	148	97	128	126	149	119	177	134	67	63	75	77	229	125	163	128	152	126	185	160	89	146	94	129	210	172	136	132	151	147	139	152	186	240	165	137	152	137
852051.APT2	94	57	111	263	191	223	329	120	119	78	28	89	33	97	101	127	146	437	251	45	55	66	49	74	47	97	174	117	148	311	187	22	50	42	161	108	198	136	149	238	240	162	252	139	174	141	120	130	110
852053.SSN2	195	171	236	188	111	82	160	149	152	167	14	166	48	165	170	252	101	210	151	43	60	54	101	122	128	171	254	222	124	195	202	81	160	122	156	178	203	116	122	196	189	154	202	164	192	199	119	149	127
852054.None	244	215	366	311	239	224	321	369	360	382	94	246	152	158	167	253	177	567	302	96	116	110	116	292	250	178	327	227	185	299	273	157	277	226	178	299	257	259	184	301	249	195	286	178	336	232	201	217	198
852057.ECM11	4	9	9	7	9	12	3	6	7	17	25	2	6	3	1	2	0	2	2	5	5	5	3	1	4	7	2	5	6	7	5	1	4	2	9	3	6	10	7	3	12	9	3	6	2	5	2	3	2
852058.RPS17B	7977	8397	7389	8064	11300	12506	9941	6519	7881	7498	10835	6990	10170	5932	5334	5748	5926	3473	5460	2454	2471	2819	11024	9758	8058	6904	5793	5277	4653	6633	4525	11417	12754	9686	8321	6911	8092	9288	8461	8930	7391	7503	6064	9137	9712	7171	6340	6783	6387
852059.ADA2	122	110	149	93	75	118	126	108	129	102	68	111	105	65	55	80	64	130	110	40	46	43	64	126	90	81	112	109	157	94	149	55	101	82	84	103	89	105	79	110	97	100	87	78	135	100	86	94	89
852060.UTP6	605	611	716	606	539	606	731	779	567	537	430	569	525	254	215	362	772	1136	933	189	228	252	316	608	451	393	492	388	428	574	557	249	380	323	471	669	690	673	441	832	653	577	678	475	832	496	534	556	599
852061.RPS18A	10081	10826	10774	10649	12808	13742	13015	9356	11042	10343	12937	9547	13325	8111	7625	9002	7200	9370	6942	1364	1460	1546	11015	11203	9577	9119	9124	7692	7276	11541	7511	11980	15698	11512	9938	9964	10381	11063	9964	11105	10516	9847	9355	11161	12344	9864	7062	7074	7136
852062.YHP1	78	53	101	59	53	63	91	118	90	115	70	92	103	51	47	49	67	81	72	15	11	8	65	86	59	53	68	58	137	89	198	61	75	41	54	76	56	85	55	96	79	95	83	48	70	45	72	87	85
852063.PPN1	634	687	821	641	579	640	712	983	1048	954	395	1305	591	519	485	649	963	1938	1262	887	857	972	541	993	684	482	664	499	725	801	883	539	840	515	504	666	640	458	450	539	522	463	520	580	742	561	1221	1426	1371
852064.TSA2	77	67	64	90	99	99	93	76	86	84	59	89	70	64	61	55	62	61	62	61	59	63	84	91	76	46	59	43	83	49	73	105	121	77	52	44	61	59	49	30	61	45	39	66	40	48	124	117	114
852065.GUK1	1630	1809	2066	1888	1940	2054	2381	1942	2152	2142	1321	1555	1665	1146	1170	1537	1247	2709	1505	292	278	279	1820	1787	1668	1472	1760	1537	1800	1946	2363	1401	2277	1636	1510	1630	1886	1538	1470	1836	1497	1458	1556	1635	2273	1695	1163	1126	1093
852066.NHX1	368	303	456	408	258	250	401	478	493	441	133	484	199	303	318	425	236	600	369	77	93	121	199	326	254	390	530	427	408	394	566	226	429	304	361	501	477	313	260	391	373	284	395	343	402	380	318	342	316
852068.TOM1	589	597	840	620	277	287	492	548	743	754	121	641	246	533	557	870	474	959	677	1346	1370	1501	293	519	346	646	880	635	430	751	623	298	611	416	468	614	702	502	478	714	525	496	699	612	607	682	582	587	564
852069.HEH2	373	375	409	280	223	282	314	334	326	391	221	274	286	279	255	309	169	238	199	353	275	362	206	462	291	276	354	251	274	303	381	200	376	270	265	362	339	268	238	326	359	264	325	281	319	256	278	296	315
852070.PFA5	191	150	200	179	159	126	173	183	211	256	133	189	182	111	90	143	86	198	167	276	265	311	227	229	188	91	112	93	369	234	443	149	274	161	126	191	156	150	127	157	133	134	147	126	167	144	165	169	170
852071.TFB3	204	162	278	185	124	118	171	208	207	177	108	218	117	127	116	180	140	242	175	274	261	298	136	205	123	163	210	185	157	227	262	95	154	112	159	206	183	157	136	223	238	156	217	139	217	159	190	189	208
852072.MFA1	4	1	2	183	6	4	4	0	5	0	0	0	0	3	0	3	2	0	1	0	1	2	0	2	1	6	5	3	22	1	8	2	3	1	3	0	2	3	3	3	3	2	1	1	1	1	0	0	3
3799972.None	38	39	26	41	5	16	6	36	47	20	17	47	9	57	41	48	24	23	8	3	3	3	56	31	21	67	64	71	87	22	107	33	32	22	61	38	44	40	43	49	41	47	21	37	52	45	42	49	38
852073.MRPL28	281	213	286	180	225	215	266	430	494	439	76	467	135	135	101	157	526	856	597	98	109	116	114	127	97	117	146	113	109	220	154	103	208	139	103	127	194	122	149	209	207	197	211	210	261	201	334	346	369
852074.STP1	266	274	376	265	135	176	233	328	367	308	114	373	210	223	218	335	217	513	310	102	89	128	222	451	352	278	340	326	351	488	547	145	298	215	197	349	258	291	209	474	387	337	441	185	332	221	381	382	381
852075.SPP41	312	291	452	274	167	153	241	285	243	267	50	236	71	200	210	293	227	539	325	323	377	356	70	209	128	235	374	257	193	389	281	102	198	141	243	355	306	340	201	410	364	347	422	219	332	173	290	312	297
852076.RMT2	856	931	1275	746	560	466	778	674	579	582	182	462	330	418	459	666	807	2250	1217	1322	1449	1579	282	478	405	677	871	693	423	937	616	246	470	311	635	716	733	937	610	1291	825	698	942	586	1069	619	518	479	512
852077.PKH3	297	309	426	249	184	156	213	268	248	293	37	231	78	216	219	329	147	374	276	153	143	169	62	234	130	232	367	253	186	334	276	105	242	145	186	324	292	213	178	301	284	232	324	202	296	260	218	264	234
852079.TLG1	267	286	292	262	260	258	293	218	291	291	175	250	195	245	252	290	196	356	232	209	240	248	259	414	328	247	306	247	239	292	281	200	251	227	280	279	261	253	241	261	282	211	260	260	259	248	243	234	232
852080.SDC1	216	208	249	207	190	178	209	107	122	122	135	196	132	166	176	169	119	164	195	35	45	57	158	254	199	150	163	126	102	173	147	140	201	145	174	197	201	179	167	216	204	178	173	166	207	141	171	164	161
852081.UGO1	176	189	249	151	144	133	201	271	269	273	88	358	133	145	125	182	233	486	288	126	162	168	107	172	130	111	187	133	143	146	197	99	177	126	113	142	172	98	108	137	151	149	190	154	197	162	259	277	294
852082.RPL27B	5338	6005	6372	5787	6045	6483	6792	5207	5845	5377	7007	6265	7120	3491	3457	4438	5260	11163	6052	1269	1358	1547	5277	5421	4895	4652	4978	4351	1675	5776	1834	4490	6306	4563	4835	4897	5913	5189	4732	5868	5233	4922	4880	5130	6328	4631	5463	5722	5639
852083.TRS31	376	357	474	329	301	215	342	223	256	258	171	263	174	223	242	343	191	203	184	190	147	183	213	334	258	230	318	240	193	331	296	192	278	213	281	301	338	306	249	378	371	307	349	321	362	270	218	221	239
852084.PRP3	167	155	229	200	125	127	159	211	202	222	82	232	129	194	153	255	102	226	143	454	492	491	115	234	163	161	225	137	168	231	262	145	212	166	157	254	194	146	106	204	198	156	184	129	190	143	179	187	174
852086.JIP4	242	192	295	225	145	112	207	392	424	487	48	341	144	243	198	443	177	566	293	32	43	40	155	237	172	136	202	183	200	291	324	156	313	288	150	220	240	125	184	219	232	170	239	214	189	293	278	314	278
852087.None	332	356	517	610	297	265	506	524	572	649	161	607	366	318	314	496	259	1093	402	122	152	128	325	436	397	517	809	698	239	502	339	232	471	338	536	535	893	458	284	754	308	356	448	221	247	240	400	406	376
852088.SNF1	406	401	610	471	307	322	431	689	582	677	180	710	317	349	347	504	603	1457	938	123	159	149	301	463	355	352	580	414	339	421	500	218	437	270	421	526	517	368	351	505	553	486	631	440	604	456	655	627	700
852089.SNM1	159	193	200	175	148	178	220	147	137	169	108	114	105	129	100	152	113	343	137	21	31	28	96	192	152	103	143	114	107	213	110	118	173	117	149	209	166	181	146	276	189	161	192	115	156	137	88	96	79
852090.PEX29	158	180	210	145	139	107	156	243	310	289	77	335	143	173	155	225	116	309	159	93	102	126	135	212	177	105	183	166	226	257	323	129	249	171	167	184	182	125	122	153	191	178	199	126	170	163	209	226	208
852091.DIG2	82	105	136	82	51	57	81	110	92	105	56	129	66	90	70	111	59	145	79	24	38	31	57	107	75	65	112	70	89	105	127	62	78	79	87	130	82	62	65	79	127	111	137	87	72	77	131	111	110
852092.PHO8	340	365	523	335	215	211	261	444	523	533	390	387	472	361	404	550	89	245	127	162	135	199	291	392	350	224	406	296	399	496	654	239	466	280	245	421	333	231	238	289	311	246	386	248	321	289	344	395	343
852093.CWC21	277	323	496	354	285	303	416	232	315	290	135	405	157	306	329	526	221	448	247	227	227	252	372	548	500	276	481	343	349	588	543	297	552	398	320	454	463	435	265	584	278	229	325	207	354	277	319	326	317
852094.KRE2	1803	1813	2242	2055	1495	1523	1951	1726	2290	2637	2569	2199	3363	2186	2155	2971	1067	1193	1194	235	267	262	1867	2463	2009	1718	2125	1750	2816	2629	3505	2029	3466	2317	1968	2768	2277	2318	1668	2710	1765	1456	1669	1599	2021	1576	1369	1559	1363
852095.VPS52	172	144	233	159	117	137	174	157	174	190	100	189	137	121	108	160	125	210	163	108	98	110	76	221	131	121	158	118	179	157	267	113	183	130	136	139	152	123	121	164	170	158	182	134	142	137	128	118	108
852096.VPS72	243	215	326	195	125	108	151	226	211	230	54	203	87	172	173	260	130	244	228	96	81	93	78	181	111	185	280	223	185	259	209	129	196	155	182	304	198	199	178	258	260	238	243	201	264	256	189	210	175
852097.VPS60	295	304	345	323	191	215	235	260	236	223	70	303	147	288	341	401	244	333	223	39	34	54	227	333	283	262	327	251	258	340	357	265	291	239	263	351	351	340	267	324	296	297	270	302	302	276	235	212	284
852098.RIB3	727	746	858	1090	914	942	1002	901	992	1019	476	681	575	818	893	1066	573	1226	691	770	812	872	1058	776	780	897	1001	810	1241	1106	1446	1352	1716	1439	891	1146	1055	929	1011	1014	858	675	741	1397	1487	1335	729	771	734
852099.PAC11	92	71	188	87	58	41	108	231	187	194	29	220	71	52	61	107	177	714	262	23	29	28	30	85	73	70	139	121	53	83	110	36	91	81	67	76	115	75	59	155	91	67	117	82	131	144	121	133	149
852100.SLD5	132	127	156	132	120	132	110	120	115	111	78	113	84	98	79	107	112	78	85	43	32	43	71	147	78	104	145	93	164	146	159	86	119	78	114	128	91	138	110	110	143	102	144	117	133	101	115	120	111
852101.PKH1	173	119	181	130	70	68	119	230	242	301	95	213	139	121	119	162	164	366	207	50	65	39	68	117	55	118	164	152	190	145	262	191	345	245	101	205	161	108	104	106	186	188	216	140	160	142	263	286	296
852102.IZH1	339	395	365	429	441	363	463	324	153	171	146	239	162	319	322	306	300	239	265	67	85	93	188	199	181	213	266	194	256	301	219	184	312	248	389	461	439	524	353	502	1108	895	966	318	366	311	901	963	933
852104.MZM1	207	211	171	134	255	272	226	202	227	183	67	255	107	138	130	124	268	363	248	58	49	41	195	175	179	89	94	85	137	115	133	146	191	137	124	116	112	131	157	102	171	164	134	217	181	203	135	179	165
852105.RSM28	534	542	590	457	555	605	688	596	554	620	176	660	256	454	351	492	617	1239	765	197	163	207	354	592	427	294	314	264	370	410	496	404	624	399	285	407	360	264	452	310	613	510	617	630	626	597	352	349	361
852106.VPS3	166	183	238	162	133	134	143	183	175	165	90	146	96	148	128	207	85	84	90	46	52	53	98	215	154	135	208	151	138	153	192	110	217	140	133	209	186	147	118	152	157	159	182	174	195	170	105	124	101
852107.PUF6	1519	1408	1669	1256	1285	1130	1429	1464	1210	1196	527	976	707	801	743	865	1930	1829	2204	740	690	730	642	1274	804	971	1172	921	1019	1321	1275	602	882	641	1102	1285	1247	1694	1246	1958	1761	1476	1573	1218	1984	1218	1188	1283	1190
852108.ITR1	1023	1008	1373	1672	853	735	1195	1091	5410	6244	1561	4493	2528	4720	4862	7120	1685	4249	2404	233	210	244	1171	1512	1224	708	1075	829	3676	2918	5142	5260	9264	6711	1516	8455	2194	741	752	942	1233	990	1360	985	1246	1009	1311	1304	1208
852109.SEC20	178	145	203	165	111	148	179	127	175	122	33	286	58	127	112	180	195	330	243	52	33	49	119	166	121	99	158	127	181	203	239	123	215	134	139	193	180	183	112	216	202	158	212	124	200	149	228	226	231
852110.LCD1	160	125	201	155	112	85	114	104	133	112	56	160	81	127	124	166	95	142	103	21	28	27	82	214	131	121	138	111	139	120	167	129	176	129	104	174	138	138	101	146	132	95	111	94	130	144	139	122	108
852111.RPL37B	6403	7312	6629	6795	8594	10856	7939	5418	7270	6858	8716	6430	7381	5983	5096	5792	6100	8219	4930	3141	3013	3541	7598	7896	7273	5710	5756	5289	6022	6498	6172	7210	10955	7890	6922	5164	6279	7515	6001	6737	7076	6472	6037	7256	7105	5698	7441	7554	7323
852112.PLM2	49	49	74	70	33	53	56	71	63	51	65	60	70	12	34	32	30	38	45	57	58	70	37	61	42	32	44	39	57	40	75	38	71	46	42	40	34	47	45	64	35	35	25	56	62	56	66	65	74
852113.SAM2	1536	1411	1866	2073	909	754	1268	1884	10178	11536	5298	8598	7379	5649	5822	7682	1646	1935	1844	416	403	461	847	1481	994	1295	1603	1293	3612	1741	4794	5703	9710	6780	2121	8858	2612	1279	1813	1613	1989	1692	2020	2407	3148	2593	2691	2706	2708
852114.LPP1	153	125	201	167	187	185	272	113	174	141	144	201	216	137	92	160	79	160	83	82	70	104	310	310	339	73	94	96	182	168	277	147	244	167	111	157	124	100	94	147	107	90	116	126	145	142	193	174	153
852115.SPG3	65	70	63	54	60	70	52	38	62	78	19	26	42	44	50	59	35	18	49	35	48	53	67	106	83	57	26	48	94	48	114	72	105	66	49	46	40	50	68	46	46	50	47	82	51	83	49	67	78
852116.PSP1	306	244	362	257	177	141	241	349	351	406	54	341	126	395	302	499	235	349	322	46	66	55	160	342	246	190	225	190	277	311	422	241	401	302	247	448	291	144	235	172	256	228	252	357	354	366	286	305	304
852117.GMC1	36	29	53	55	32	25	39	27	38	36	6	57	8	31	53	76	44	132	88	22	35	26	11	35	33	27	61	35	47	71	66	31	58	42	32	32	65	30	19	41	31	24	45	30	40	37	32	31	28
852119.GIN4	429	358	565	458	328	292	449	333	256	259	155	283	221	326	246	365	253	432	356	331	337	342	272	654	435	457	650	517	257	362	399	159	274	230	344	522	452	350	308	525	439	343	461	376	453	400	371	375	402
852121.GNP1	2069	1973	2799	1464	1189	1001	1481	2025	1572	1605	555	1654	782	1239	1266	1798	901	2663	1479	947	980	1182	781	977	808	899	1202	959	2013	2593	2782	765	1421	1003	1462	2070	1788	2032	1250	2613	2912	2257	3026	1151	2108	1304	2141	2289	2163
852122.SMT3	1114	1249	1243	1241	1421	1543	1380	1218	1225	1253	1579	1197	1513	1015	958	1097	756	903	645	221	220	182	1605	1650	1438	919	999	832	1073	1156	1163	981	1421	945	1075	1022	1131	1258	1153	1257	1206	1181	1006	1312	1489	1133	845	936	852
852123.SDH7	146	193	151	142	179	170	129	203	248	194	180	215	160	115	114	142	157	100	136	46	45	67	176	138	124	71	52	45	116	99	86	170	171	133	105	89	87	67	114	55	146	159	112	165	107	114	141	136	140
852125.EMI1	209	266	233	226	190	253	191	371	454	414	346	281	350	286	199	300	252	461	245	101	107	110	354	298	296	130	114	136	280	207	346	243	270	179	212	134	167	175	174	171	236	160	187	240	162	218	259	255	265
852124.GRX2	498	554	498	535	512	631	460	336	530	395	286	455	271	476	499	512	384	127	327	114	114	115	609	542	472	336	358	287	476	264	510	490	589	440	374	345	431	255	401	273	476	474	397	538	318	414	563	553	563
852126.None	275	280	422	283	215	190	284	319	284	275	109	375	154	252	198	327	446	731	534	136	183	150	121	269	206	262	366	311	156	336	283	162	265	215	232	376	340	340	203	423	322	240	349	182	252	191	297	329	345
852127.SLF1	188	191	264	157	135	142	168	334	223	253	53	223	73	100	111	170	388	607	395	37	30	42	78	191	115	96	195	140	113	78	167	64	147	105	118	169	150	107	100	126	148	106	178	126	202	167	178	178	189
852128.EMI2	146	171	221	174	165	159	275	937	813	921	167	1412	320	167	139	221	312	798	441	42	55	59	97	93	91	93	128	135	87	169	119	154	231	203	109	101	113	151	348	204	491	347	470	536	292	645	3074	3283	3144
852129.GRH1	412	378	665	633	372	281	530	560	571	587	154	742	247	490	463	780	321	1310	552	91	89	102	345	351	379	443	671	520	348	627	560	374	630	487	487	718	667	455	493	613	454	348	554	659	790	843	897	931	844
852130.EUG1	232	191	234	221	230	218	323	170	247	231	258	235	301	253	254	285	110	126	121	69	68	66	267	284	238	337	342	337	220	186	232	276	335	273	297	311	262	183	175	232	138	145	131	241	280	224	330	309	373
852131.FPR2	587	609	634	701	850	1017	937	865	1208	1171	1232	1050	1403	628	629	776	365	255	352	357	348	449	1051	779	858	452	521	426	393	480	455	750	1038	800	509	558	605	624	541	635	441	382	409	477	556	494	776	830	850
852133.URC2	159	146	243	145	109	105	164	209	195	171	67	149	109	135	111	184	126	222	160	118	110	118	87	221	164	150	211	148	229	217	304	98	195	143	135	208	202	172	130	196	144	137	173	108	182	129	108	144	119
852134.SPS2	22	21	22	13	9	9	13	9	13	10	4	5	5	16	9	12	10	1	9	28	36	32	7	5	2	5	24	18	16	15	29	12	26	6	14	10	11	21	13	17	4	13	3	14	28	17	11	7	12
852135.SPS1	9	8	11	28	12	5	12	4	19	11	3	14	12	7	3	8	2	4	3	4	7	6	2	8	6	11	19	9	23	11	22	3	2	3	7	4	11	9	7	6	15	15	18	8	6	10	1	5	3
852136.AGE1	464	362	610	484	418	430	662	140	183	175	50	152	68	302	342	475	160	376	253	125	136	153	172	375	275	304	456	368	290	334	427	183	353	251	342	402	484	389	304	450	540	431	540	341	510	429	202	201	143
1466437.YDR524W-A	2598	2652	3287	2735	2401	3319	2886	2423	4105	4203	3774	2788	3327	2551	1760	2839	2252	2149	2427	2231	2183	2281	2727	3163	2791	2431	3553	3112	3094	1397	3902	1371	2717	1955	2449	2665	2682	3206	2135	3143	2184	1603	2267	2987	3197	2850	3173	2966	2927
1466438.None	13142	13399	14897	13253	14038	16174	15882	15448	15279	16195	9760	12118	12234	9875	9258	11119	12243	10868	11784	729	760	865	9453	9717	8008	11098	13006	10601	11834	8677	12189	7821	10768	7440	11343	13517	13087	12602	10948	13266	11301	9928	9880	12809	16205	11097	8108	8329	8132
852137.API2	4	7	6	7	5	3	5	11	13	10	11	29	9	1	2	3	22	49	28	6	8	6	2	8	1	5	4	6	8	4	4	7	6	5	2	7	2	1	3	0	1	5	3	0	0	0	32	36	35
852138.SNA2	237	226	263	250	178	172	186	111	147	124	161	250	146	390	421	488	238	385	272	205	252	227	286	195	199	330	317	293	256	331	258	313	384	312	250	300	282	283	225	283	251	294	227	201	289	149	295	326	294
852139.RBA50	645	631	883	595	402	389	509	547	631	605	384	526	553	422	362	556	425	826	508	362	425	424	265	599	352	527	683	533	495	660	687	280	488	316	604	787	767	664	426	797	660	570	660	480	743	476	430	442	479
852141.HLR1	99	75	116	89	48	66	118	154	90	73	17	36	35	50	48	59	35	84	72	17	20	19	68	145	67	65	78	54	71	111	141	42	97	60	106	175	93	140	79	166	61	70	76	92	119	68	106	98	128
852142.QCR7	1706	1904	1661	1048	1757	2014	1663	1274	1586	1778	674	1288	829	1330	1338	1401	887	470	762	130	147	132	1800	1773	1522	509	409	374	2562	1302	2532	3050	3628	2623	691	1159	703	488	1154	448	1679	1750	1344	1764	1428	1521	696	756	820
852143.APA2	137	112	187	145	100	86	155	244	312	345	201	282	354	153	172	240	96	160	144	99	85	118	102	108	82	77	109	101	215	223	324	155	271	207	93	221	152	90	86	158	130	78	150	105	121	137	152	132	104
852144.CAB1	567	540	689	764	610	662	802	654	802	778	464	632	688	537	526	692	453	673	578	178	133	176	474	709	586	484	665	501	750	562	1030	543	814	640	605	874	795	540	459	654	559	534	583	583	804	659	551	535	519
852145.KRE28	124	137	147	100	98	101	146	130	68	89	69	73	106	67	59	83	37	59	31	25	16	24	76	143	112	74	86	63	83	81	121	84	149	96	71	110	76	77	79	96	105	101	103	104	108	108	34	52	39
852146.HSP31	205	183	252	490	224	234	295	101	129	132	64	59	100	125	127	171	19	60	23	38	37	25	138	180	120	102	133	94	160	121	239	168	269	135	97	107	111	93	243	119	112	98	123	381	274	436	45	36	30
852147.FIT1	14	25	22	143	24	19	35	6	5	2	1	3	2	29	25	36	12	23	14	42	34	24	16	13	11	58	73	48	84	108	106	40	68	34	264	123	292	485	202	524	346	298	315	25	14	20	13	20	10
852149.STL1	53	47	60	61	32	45	46	106	154	169	50	75	105	56	43	59	32	59	47	27	20	35	95	104	82	25	31	37	69	59	84	41	83	51	40	64	44	43	44	48	40	39	38	28	31	34	23	34	21
852150.PAD1	154	123	217	218	130	153	237	399	431	474	278	401	386	127	169	210	247	492	375	512	586	588	272	301	303	129	165	135	177	262	284	118	264	199	151	263	225	93	134	157	170	151	159	172	257	196	394	389	350
852152.FDC1	459	474	593	356	185	162	256	562	573	617	151	645	291	446	429	684	389	957	531	173	69	85	385	408	364	354	555	426	272	547	357	379	526	424	391	605	495	379	205	474	234	175	225	143	239	208	537	549	499
852153.IRC4	52	51	42	64	65	69	90	0	0	0	0	0	0	41	53	56	0	0	0	0	0	0	0	0	0	27	28	17	28	15	32	44	91	75	40	38	26	33	24	38	30	30	28	32	22	32	0	0	0
852154.None	182	167	245	248	186	167	196	137	204	168	110	120	149	178	194	232	98	153	115	153	145	182	59	149	95	266	309	233	143	141	219	173	224	170	184	262	252	211	185	215	218	169	182	217	218	189	82	73	80
852155.PAU10	4	5	3	3	3	0	4	0	0	0	5	5	4	2	0	1	11	32	6	3	0	0	3	0	2	5	17	5	4	2	13	2	3	3	0	0	0	6	4	6	0	0	1	3	6	4	17	10	14
852158.YRF1-1	84	66	142	2	10	12	15	0	5	0	2	7	10	36	45	79	5	10	6	0	0	0	5	5	4	9	10	8	37	50	66	16	54	28	30	40	47	89	117	124	62	46	68	100	100	131	22	31	28
856630.None	474	453	769	86	195	146	245	495	603	622	75	77	182	118	152	205	189	827	368	11	15	12	42	69	61	70	87	61	949	2329	1757	618	1117	900	88	159	123	49	38	59	54	52	71	201	230	232	781	838	749
856632.None	1	1	3	0	2	2	2	9	6	5	0	5	0	1	3	4	0	5	1	0	0	0	1	0	0	0	5	1	1	6	3	0	0	0	0	0	0	1	0	2	2	2	0	0	0	0	0	0	0
856633.None	9	4	13	4	1	0	8	0	1	1	0	5	0	18	12	28	2	8	4	0	0	0	2	8	13	0	0	0	9	12	18	0	0	0	0	0	0	0	0	0	0	0	0	0	3	1	0	0	0
856634.None	10	10	19	37	8	16	17	0	0	0	0	0	0	70	38	64	0	0	0	0	0	0	9	7	20	3	3	2	22	25	23	11	10	10	0	0	0	0	0	0	0	0	0	0	0	0	0	0	0
856636.None	51	73	78	108	62	43	51	50	51	38	13	37	13	182	212	237	45	20	42	55	37	37	33	76	67	55	79	47	42	29	81	542	908	672	99	254	164	78	66	94	42	44	42	73	53	77	53	81	67
856637.RMD6	57	88	52	64	35	42	36	38	35	42	17	58	44	89	79	111	39	27	51	89	87	93	78	132	85	45	59	47	334	98	356	126	173	136	58	142	59	56	103	50	69	53	45	170	178	150	95	102	105
856638.DLD3	1843	1873	2679	2632	998	1024	1528	1002	752	748	303	546	435	2087	2010	3015	301	541	320	115	128	110	829	1481	1109	1853	2748	2061	4255	2264	6159	1954	3683	2836	2040	2588	2862	2272	2779	2995	1484	1297	1834	3916	4319	4717	1284	1299	1314
856639.DSF1	6	2	6	15	3	4	6	38	23	14	7	21	4	3	6	10	3	4	3	1	0	0	4	3	4	51	66	43	4	2	6	9	32	21	11	12	20	42	18	54	9	5	9	17	31	32	1	2	1
856640.HXT13	13	8	12	7	8	4	7	67	57	36	4	173	14	4	6	12	70	183	105	37	32	35	0	4	1	8	14	7	3	15	9	13	4	8	7	13	13	5	6	8	12	6	9	11	18	13	117	122	113
856641.None	145	145	146	155	201	206	181	6	18	12	11	6	8	106	92	138	26	81	25	14	22	18	137	135	113	137	215	154	246	135	248	169	202	196	85	100	120	106	137	86	94	90	79	145	139	119	75	69	82
856643.None	31	52	40	89	38	30	38	0	0	2	1	0	1	18	18	23	0	1	1	0	1	0	23	15	36	124	190	134	34	28	63	30	45	42	66	49	121	50	32	82	49	44	55	26	38	16	0	0	0
856642.HPA3	136	152	184	183	216	234	256	404	413	487	297	299	322	166	160	205	104	180	126	750	823	850	596	357	402	126	130	122	148	186	186	329	341	278	147	107	132	113	146	151	179	149	147	224	243	212	404	336	347
856644.SIT1	239	236	325	1773	333	330	460	159	154	105	35	159	80	20	30	36	117	243	153	426	443	493	119	149	140	1660	2111	1751	83	310	104	53	105	63	2154	1593	2907	1147	561	1572	898	744	916	233	318	288	183	165	177
856645.AVT2	176	155	197	86	79	69	87	50	44	54	29	47	41	70	54	80	22	52	39	38	34	26	91	104	81	86	97	66	92	75	123	69	104	70	56	67	68	89	46	100	73	92	95	54	71	62	45	52	45
856646.CAN1	658	579	913	525	239	263	453	937	751	890	331	815	463	371	354	470	604	1093	826	96	75	96	226	340	301	341	583	399	530	840	760	204	471	291	435	728	570	467	384	659	647	557	735	446	833	570	656	713	640
856647.NPR2	139	145	132	100	78	71	115	150	146	157	49	148	73	109	129	182	82	95	100	305	319	330	61	110	96	74	97	93	99	88	135	77	117	84	110	148	85	70	71	95	134	128	138	99	142	107	152	156	143
856648.CIN8	149	136	167	121	122	129	163	130	96	115	42	111	86	103	87	126	82	109	142	91	100	86	107	247	152	123	152	134	104	110	122	89	148	111	128	148	159	100	154	158	173	160	162	124	198	132	108	127	142
856649.PRB1	2264	2083	3446	3708	1474	1147	2295	3447	3839	4168	483	5498	1238	2936	2848	4506	1031	3449	1626	89	104	151	2144	2250	2365	8020	13700	10389	2629	4543	4026	2594	5115	3762	3247	5457	4941	3502	2479	5212	2080	1504	2294	2200	2448	2819	2365	2464	2397
856650.SOM1	116	108	87	82	95	125	69	77	99	79	104	61	92	105	86	70	41	69	15	13	10	16	129	91	101	95	73	58	85	48	103	154	157	90	72	48	62	52	91	44	114	94	70	104	82	81	39	59	39
856652.PCM1	855	751	1144	832	539	470	810	779	979	1049	640	922	801	1124	1088	1632	492	1418	688	458	511	541	769	620	656	841	1282	894	879	1074	1110	648	1044	730	720	983	994	530	600	733	1099	923	1301	777	861	946	667	702	641
856653.SDD1	94	101	87	46	14	55	33	3	18	7	8	9	11	67	70	69	11	6	11	96	102	91	13	15	20	24	22	19	28	25	39	17	18	21	44	25	50	49	28	58	26	24	14	26	18	31	11	11	14
856654.HAT2	347	305	507	354	220	192	357	380	378	382	183	283	292	287	282	398	223	387	270	351	377	430	204	310	311	262	382	287	226	406	389	179	320	220	288	360	365	255	202	315	312	249	383	268	346	259	299	322	277
856655.POL5	771	712	996	907	749	683	899	685	732	751	323	590	493	581	558	787	711	1325	914	1441	1357	1600	384	842	555	711	957	803	542	911	756	358	614	423	737	1031	978	891	724	1155	857	778	984	733	1153	863	673	670	671
856656.RPL12A	9662	9881	10585	10885	11342	12405	12761	9596	11187	10579	10519	10362	13341	7024	6975	8367	7761	12249	9427	4091	4155	4359	9089	9467	8375	8345	9428	7548	3675	9358	4429	10081	14421	10389	9672	9692	10818	10600	8953	11448	8698	8114	8109	9737	11760	9194	8406	8630	8545
856657.MAK10	322	298	410	293	235	196	337	351	418	438	80	366	195	218	223	401	274	459	374	50	55	49	102	251	191	272	369	315	143	347	184	181	292	186	267	313	307	246	202	319	408	330	421	270	353	267	352	370	313
856658.AFG1	217	211	284	224	174	181	266	336	395	354	86	361	161	193	209	315	202	343	258	324	350	386	160	264	229	147	219	202	169	349	337	181	368	261	176	257	234	104	155	177	250	176	261	231	339	253	236	194	216
856659.VMA8	1330	1330	1484	1581	1809	1727	1943	1396	1792	1772	1864	1714	1936	1236	1213	1473	870	872	882	1248	1140	1182	1533	2137	1680	1142	1291	1093	1731	1362	2111	1546	2206	1623	1367	1565	1399	1328	1200	1352	1408	1183	1262	1343	1489	1192	1389	1615	1473
856660.RML2	450	468	650	430	455	469	667	797	658	615	116	707	215	322	284	486	661	1202	855	195	202	206	390	408	408	199	330	250	355	453	549	346	686	505	304	414	358	226	379	345	490	374	568	594	774	736	471	517	407
856662.PAU2	11	14	30	26	12	16	22	5	9	6	0	5	4	15	8	22	3	0	1	0	1	3	4	17	8	14	20	11	30	23	60	47	59	46	15	20	12	18	10	9	21	14	28	8	27	25	8	3	3
856663.TCA17	258	277	471	327	186	197	334	81	100	83	21	80	49	110	102	211	72	89	65	12	3	7	177	340	319	131	272	190	369	334	698	138	366	251	169	254	302	167	161	308	160	177	238	168	403	277	70	62	71
856664.FRD1	491	518	687	467	368	373	408	485	484	493	209	502	284	364	387	424	304	803	388	96	80	79	237	240	237	630	903	658	296	414	414	451	719	512	403	628	523	467	511	638	409	347	497	726	924	740	739	745	708
856665.GLY1	1492	1317	2218	1543	1312	1071	1916	1759	1239	1470	160	1105	423	949	935	1469	1017	3452	1839	120	132	141	841	1037	939	1678	2954	2265	1499	2822	2139	468	998	709	1056	1490	1481	1895	2202	2832	2286	1746	2432	3223	3424	3808	1655	1693	1699
856667.IES6	567	671	804	736	558	603	813	878	803	831	221	742	338	523	498	697	422	2507	690	1693	1865	2037	943	777	867	453	494	413	710	791	984	738	1304	984	526	526	671	429	608	653	580	640	680	712	915	942	796	771	746
856668.None	364	240	466	316	257	194	318	504	516	634	145	609	254	269	277	409	361	715	563	205	201	202	155	320	211	234	386	316	335	456	462	202	304	196	250	369	339	272	230	352	359	310	446	276	294	278	425	522	489
856669.GDA1	770	760	1215	860	544	538	895	954	970	1045	714	1045	957	569	584	942	688	1306	923	410	491	531	596	849	742	619	920	662	685	1260	1029	460	1067	759	661	859	936	701	578	1019	783	718	1043	704	1074	916	831	839	839
856670.YEF1	58	45	97	95	44	46	66	49	73	80	25	42	29	70	73	122	6	31	22	4	4	8	31	69	54	70	96	75	37	57	89	57	76	73	48	92	63	32	46	64	58	54	82	84	57	86	37	38	40
856671.UTR2	1723	1730	2543	2448	1538	1422	2880	3485	3052	3392	3157	2958	3924	2186	2123	3453	2455	4647	3400	244	223	288	846	1089	947	1458	2108	1601	2039	3634	2916	980	2002	1401	1820	3414	2705	2102	1880	3219	2517	2173	3019	1953	3225	2581	2196	2395	2289
856672.CYC7	7	21	7	39	8	17	16	182	517	493	371	379	345	66	49	62	49	46	55	23	18	32	4	9	5	6	14	8	61	10	72	39	49	46	8	5	5	4	24	2	145	168	116	26	9	12	623	605	621
856673.UTR4	239	235	321	297	239	212	303	326	411	350	211	451	289	189	144	239	345	903	389	219	226	241	120	145	146	206	276	226	244	282	343	103	245	165	175	179	208	108	166	161	191	145	217	265	342	337	541	549	581
856674.RAD23	1206	1102	1872	1266	836	810	1235	1521	1552	1521	315	1623	537	1004	1032	1555	1262	3221	1966	644	681	733	554	838	769	1279	2000	1554	882	1492	1350	447	993	662	1009	1353	1514	966	1011	1283	1301	1142	1568	1448	1967	1606	1492	1508	1544
856675.ANP1	796	733	1003	485	357	299	530	880	649	663	169	672	299	516	494	617	606	2003	953	68	85	69	329	440	336	450	662	457	412	710	575	276	459	364	440	679	644	478	390	675	886	700	851	536	719	624	685	691	646
856676.UTR5	1	5	2	5	3	2	0	7	12	8	3	5	13	2	1	10	1	4	3	3	2	5	2	2	0	4	4	1	1	3	4	4	6	2	6	5	2	0	5	1	5	5	4	3	2	5	3	5	6
856677.HYP2	15293	15230	16795	12121	9244	9785	10409	12820	11834	12095	6962	10593	9291	12845	12779	14882	11433	8618	11849	1409	1434	1649	10490	10325	8566	10675	11178	9010	14197	14999	15996	7778	11262	7938	14251	18461	14495	8943	10311	9207	17680	16031	15019	14598	16046	12628	8508	9243	9018
856678.MTC7	1189	1149	1226	813	611	655	718	566	875	901	658	514	676	1033	860	1156	403	160	459	731	703	673	1007	988	828	742	834	847	1112	613	1519	559	826	653	1107	950	999	705	623	713	1191	935	1057	836	942	898	408	431	416
856680.MCM3	481	449	747	404	296	248	491	1035	770	849	29	613	181	321	262	516	438	1558	733	138	161	194	169	281	222	344	587	439	392	795	596	246	575	396	354	557	513	334	267	519	584	441	713	350	402	402	429	469	507
856681.SPF1	1280	1132	1672	1389	971	857	1297	1675	1974	2089	768	1754	1156	1461	1441	2027	967	1604	1325	982	940	1086	996	1264	1065	1521	2054	1648	1203	1619	1585	845	1490	1013	1312	1792	1635	1095	1003	1385	1373	1190	1537	1294	1546	1491	1507	1607	1459
856682.ECM10	102	108	130	128	98	110	138	76	136	107	51	64	77	64	74	124	37	81	30	35	24	40	67	169	114	54	87	67	94	104	166	82	144	106	86	99	96	46	48	57	107	88	89	96	97	88	56	61	59
856683.BUD16	231	271	304	215	238	214	274	254	350	338	256	248	339	250	223	307	154	219	181	165	180	220	211	291	214	195	255	186	226	281	280	210	340	238	191	231	244	186	189	226	224	188	227	289	318	314	235	240	276
856684.None	24	26	42	47	42	24	50	0	2	3	0	0	1	53	73	87	0	0	0	0	0	0	66	69	46	45	60	55	72	53	105	65	107	82	43	52	39	32	41	46	62	47	32	60	38	67	0	0	2
856686.VMA3	3830	3948	4728	4817	4559	4673	5380	4320	6623	6561	8929	6566	9836	3843	3925	5174	2411	3424	2778	16042	15691	18480	5532	5042	4539	3621	4166	3515	6813	5202	8036	5932	8681	6363	3895	4227	4738	4465	3912	4924	3949	3511	3648	4213	4509	3957	5889	5766	5964
856687.SNU13	2575	2914	2939	2760	2128	2729	2772	2386	2605	2504	2551	2485	2436	1984	1850	2334	2471	1902	2772	1532	1420	1457	1977	2566	2085	2185	2951	2222	2252	2998	2698	1370	2452	1708	2250	2142	2722	2872	2210	3317	3155	2879	2893	2518	3537	2378	2046	2110	2119
856688.None	250	253	372	275	176	189	282	120	177	178	66	123	108	216	235	385	85	180	134	76	78	100	116	332	259	235	350	278	291	305	523	163	344	283	219	376	294	127	149	176	297	237	339	233	244	254	142	127	137
856689.RIP1	1208	1177	1505	581	660	566	797	1201	1416	1524	226	1561	563	940	972	1195	675	770	840	22	20	25	638	923	678	367	390	338	1250	1054	1594	1158	1869	1454	418	935	478	159	633	226	1535	1253	1427	1177	1012	1181	505	569	545
856690.None	115	107	178	117	54	58	86	9	19	11	10	25	12	94	80	145	17	28	12	3	6	8	45	152	103	79	142	91	148	126	257	56	98	84	92	130	99	77	56	107	83	63	100	66	115	101	8	9	12
856691.GEA2	433	373	541	399	268	221	349	459	502	454	141	456	244	318	321	477	313	543	449	261	287	294	187	475	276	482	588	453	402	468	528	160	309	226	431	543	521	338	271	377	457	400	495	342	413	344	431	441	492
856692.URA3	783	892	1140	2298	1403	1486	1935	2512	1622	1571	646	1175	983	1381	1305	1846	2707	6669	3350	288	306	353	956	1255	1082	1609	2241	1722	614	1698	800	727	1180	879	2264	2070	3059	1008	758	1389	1218	1032	1406	813	1611	846	1143	1223	1152
856693.TIM9	1339	1401	1262	1084	2059	2299	1885	990	1017	946	777	967	719	883	815	989	1227	860	969	314	359	406	1467	1522	1232	481	457	392	1233	1047	1316	1550	1966	1438	820	711	843	872	1208	812	1483	1409	1160	1724	1726	1406	1209	1308	1226
856694.PXP1	151	138	245	226	231	184	345	121	168	189	20	129	55	130	145	210	39	138	59	62	68	77	134	163	139	111	210	154	196	225	221	99	176	125	120	172	162	141	173	193	190	165	219	226	284	255	105	117	114
856695.MMS21	78	55	80	46	52	30	54	36	52	82	35	84	47	36	15	30	51	70	50	15	18	22	8	23	28	20	28	33	15	32	30	21	28	15	35	47	28	30	32	43	50	47	58	42	79	40	50	68	59
856696.EAF5	151	134	162	170	209	204	206	148	114	126	63	71	75	142	151	172	105	177	101	59	86	85	132	231	140	143	192	156	215	238	247	94	190	127	161	193	160	176	150	205	220	153	218	147	211	153	92	106	98
856697.PMP2	2107	2536	2811	2185	1920	2092	2408	2434	2458	2623	992	1423	1399	1689	1983	2622	1786	1168	1992	259	192	250	1658	1574	1440	1911	2088	1893	1790	765	2184	1661	2685	1905	1811	1978	2485	1922	1919	2593	1730	1865	1752	1910	2637	2017	1167	1329	1245
856698.GTT3	208	128	226	181	182	129	227	444	322	284	42	390	118	111	114	150	268	663	418	53	60	79	153	174	162	77	156	137	175	195	232	108	204	176	139	144	146	96	109	145	171	167	219	142	168	193	278	280	288
856699.NPP2	165	139	227	178	120	123	177	214	352	381	265	405	381	176	159	232	132	407	189	168	200	203	128	202	163	104	185	141	179	265	309	129	271	208	133	231	185	130	115	164	174	158	208	105	184	148	165	189	156
856700.EDC3	636	693	1026	754	511	453	755	635	595	599	199	798	312	516	535	872	526	1163	804	636	638	694	371	681	651	424	793	624	576	943	893	371	680	480	545	883	862	612	557	875	666	561	878	663	928	782	587	631	604
856701.None	13	10	13	11	15	7	14	34	53	83	30	18	51	11	10	8	7	12	15	36	26	20	6	9	3	4	20	11	35	18	26	4	11	10	8	7	8	5	15	6	12	6	8	7	7	9	13	14	21
856702.VAC8	417	450	562	501	311	284	387	630	550	581	145	616	317	399	395	560	538	1123	838	78	80	113	248	443	320	376	585	403	449	462	571	244	467	310	488	717	559	370	335	442	473	455	510	417	472	372	613	644	661
856704.UBC8	122	109	166	140	82	99	95	94	147	127	47	183	55	202	129	201	39	81	40	20	26	16	61	89	82	99	164	153	120	104	145	88	127	108	122	153	134	57	66	65	117	93	104	138	124	97	121	120	111
856705.GLC3	66	73	99	81	52	68	83	526	916	1197	41	466	222	201	186	285	40	63	30	63	50	56	48	109	85	90	124	103	124	106	211	135	369	243	69	108	128	29	51	53	148	80	147	79	73	70	405	423	407
31009438.None	3	10	4	2	0	1	2	0	0	0	0	0	0	1	0	1	0	0	0	0	0	0	10	14	11	4	3	2	7	7	5	2	6	5	2	2	1	0	2	0	3	0	3	2	3	1	0	0	0
856709.GCN4	6151	5771	6551	5823	5428	5077	5650	6400	8213	8793	4749	7183	7308	6298	5900	7262	5757	5420	6347	10610	11105	12501	4288	6142	4415	7083	7786	6630	5729	5831	6403	4591	6412	4711	6350	6869	6428	7087	6234	7398	6050	5495	5157	7696	6846	6667	7902	8075	8059
856710.None	13	7	17	15	11	8	13	4	7	4	1	6	9	8	11	9	3	16	4	4	2	1	7	11	7	5	12	8	10	5	11	8	6	7	10	11	12	8	6	4	6	10	12	2	10	6	7	4	0
856711.MIT1	373	308	522	489	328	310	454	501	340	371	56	381	96	497	433	672	284	449	398	90	53	62	98	237	157	360	647	432	250	528	424	260	571	408	459	572	602	289	272	314	506	468	549	311	427	366	407	450	397
856712.YEA6	309	311	375	311	313	312	377	368	393	437	209	342	268	256	222	335	233	261	334	398	371	431	294	274	263	196	257	194	326	330	458	291	458	362	236	387	276	239	247	296	243	182	243	315	367	314	284	328	323
856713.VAB2	90	95	100	98	99	85	102	108	95	86	43	84	55	104	115	122	83	80	97	134	101	122	35	90	49	50	72	49	87	82	130	133	163	98	86	92	90	74	79	59	63	60	57	62	73	71	110	115	119
856714.YEA4	132	106	123	108	96	116	123	113	104	122	119	121	120	87	93	104	68	128	99	105	111	117	34	65	40	73	66	71	77	87	83	104	155	112	60	118	101	66	78	103	95	72	81	123	142	96	115	92	114
856715.GIM4	538	584	521	477	598	826	628	497	549	530	674	478	576	365	360	368	524	342	431	165	179	188	623	1020	705	348	389	296	649	369	742	540	616	463	436	332	413	470	486	471	506	523	416	529	667	470	433	386	402
856716.WBP1	876	860	951	901	844	769	1138	964	1028	1108	956	1118	1133	880	889	1123	576	933	674	227	225	267	863	1136	981	693	942	736	1060	1015	1258	743	1162	847	771	1048	1028	741	702	897	792	717	868	875	1029	866	867	913	803
856717.IRC22	648	687	837	865	1060	1012	1203	1085	1528	1337	1816	1499	1985	799	827	1073	636	1250	737	628	658	731	1115	1123	1123	629	798	665	1014	871	1195	800	1130	857	613	753	680	645	555	734	675	632	691	675	762	644	968	857	849
856718.MNN1	1299	1284	1992	1307	592	548	1105	2068	2492	2584	2183	2449	3066	962	817	1415	1461	3168	2070	699	825	926	535	1204	860	736	1118	929	628	1098	937	705	1495	1141	1172	1687	1668	907	1191	1313	1418	1227	1715	1666	1935	2068	1548	1652	1667
856719.NOP16	1004	1074	1363	882	685	664	844	945	563	542	171	768	271	641	558	783	1014	2768	1255	102	88	79	362	747	567	784	988	825	546	888	682	331	554	421	795	923	995	1118	789	1305	1038	899	1048	821	1451	832	725	658	698
856720.PMI40	1042	815	1155	684	602	692	785	815	906	852	363	724	431	875	881	1149	537	534	611	72	65	82	880	1069	933	461	780	540	782	996	967	606	1062	709	572	750	617	739	667	778	1082	954	1022	753	833	795	786	840	723
856721.FMP52	600	601	1034	719	481	548	853	659	858	757	196	716	424	552	484	819	237	800	364	56	57	66	355	414	399	337	615	420	597	840	1029	335	733	489	543	795	788	395	486	643	840	628	899	694	953	861	447	407	404
856722.YND1	258	304	443	341	288	248	380	285	264	294	115	256	160	239	284	375	169	523	283	823	889	1066	277	322	258	228	313	279	323	422	459	213	315	246	261	407	376	303	262	329	298	290	384	293	435	341	328	310	276
856723.NUG1	1656	1427	1815	1336	1144	1028	1371	1403	1015	1028	208	756	379	860	903	1135	1699	2946	2305	639	703	736	625	955	733	1161	1548	1223	961	1527	1235	558	937	682	1383	1424	1459	2010	1353	2275	1917	1599	1818	1118	1864	1148	1011	1054	1032
856724.PAC2	127	120	181	174	155	140	168	124	146	126	95	145	140	92	87	160	92	190	135	343	380	351	107	191	185	81	141	90	125	142	166	69	149	94	77	148	147	88	97	134	119	87	137	119	109	104	127	155	161
856725.TMA20	612	712	822	870	673	763	860	487	457	439	280	436	315	778	736	928	501	329	540	276	235	313	680	865	740	714	855	634	582	914	622	561	853	588	725	808	870	811	665	1007	849	800	793	723	904	719	506	543	429
856726.SEC3	384	358	482	369	278	251	356	368	518	520	311	469	441	336	321	466	212	436	292	338	324	396	235	636	377	328	454	346	432	399	535	257	482	345	333	457	402	304	251	356	343	317	385	311	345	314	339	334	304
856727.NTF2	2308	2451	1901	1979	2835	2996	2335	1491	1598	1714	1291	1241	1383	1868	1732	1544	1446	757	1225	479	477	546	2447	1976	1543	1950	1502	1301	2575	1673	2184	2282	2430	1703	2161	1951	1762	2489	2149	1985	2504	2306	1634	2230	2224	1544	1366	1320	1306
856728.None	206	180	245	208	184	164	240	101	91	125	57	86	63	194	167	258	49	115	49	36	50	52	207	268	226	146	181	123	273	267	383	179	337	194	176	172	181	170	147	192	180	155	157	205	174	193	59	56	40
856729.TIR1	27	27	46	194	570	563	647	88	38	45	5	40	9	3	3	13	123	138	157	44	59	53	14	8	11	33	38	29	8	12	15	58	98	98	5	5	19	212	242	278	58	61	78	395	500	344	4214	4534	4319
856731.PRE1	803	882	1108	938	655	686	874	981	1141	1180	664	1020	906	894	830	1104	563	646	609	117	177	143	543	873	632	752	848	697	871	770	1029	393	637	471	873	968	982	615	608	671	764	705	741	853	866	826	715	791	803
856732.PRP22	170	156	227	122	91	74	150	354	267	301	39	151	121	110	100	175	111	237	146	84	79	118	59	168	132	154	251	213	132	166	162	55	161	74	129	185	132	117	97	188	155	125	176	102	156	128	155	155	140
856733.HEM14	70	77	139	98	74	56	92	198	94	157	34	160	75	81	76	105	68	195	107	15	13	11	34	92	63	66	94	72	74	104	103	56	148	116	77	146	115	71	55	66	104	74	135	73	152	88	234	234	273
856735.BUD25	0	0	0	0	0	0	0	0	0	0	0	0	0	0	0	0	0	0	0	0	0	0	0	0	0	0	0	0	0	0	0	0	0	0	0	0	0	0	0	0	0	0	0	0	0	0	0	0	0
856734.FAA2	62	60	97	130	61	71	103	136	181	197	68	311	78	67	54	83	158	263	183	23	23	16	53	108	69	51	86	44	118	128	188	86	166	100	55	142	75	52	62	106	91	55	85	41	93	47	165	196	133
856736.BIM1	271	308	500	357	290	320	409	277	224	223	144	280	152	198	194	355	215	379	218	36	30	35	253	628	443	300	406	360	262	384	389	176	374	251	244	369	376	211	191	280	255	229	343	233	349	279	193	199	217
856737.AFG3	421	347	548	385	346	271	433	878	835	866	67	1070	235	414	390	537	546	1686	775	24	30	23	199	321	258	299	434	328	364	539	607	209	388	275	326	439	441	269	254	341	461	403	563	327	471	366	528	553	464
856738.SPC25	134	144	236	254	185	223	299	127	180	147	158	152	95	170	105	235	110	304	120	239	236	270	346	285	422	95	166	141	210	319	319	295	404	335	137	178	241	135	102	232	228	176	269	146	223	189	175	161	186
856739.ISC1	226	232	452	354	201	155	408	412	401	408	78	347	159	247	215	455	217	712	341	261	236	316	186	260	228	153	308	263	291	470	540	159	426	287	239	361	376	159	180	386	331	226	554	172	283	302	345	403	341
856740.SBH2	2770	3002	2782	3367	4129	4574	3803	1492	2488	2345	4165	2134	3427	2813	2343	2759	1109	656	804	425	427	421	5691	4182	4115	1903	1956	1742	3893	3341	4360	5729	6788	5202	3059	2277	2898	2743	2673	2836	2841	2243	2198	3074	3106	2484	2191	2175	2116
856741.GPA2	322	335	487	442	190	188	337	748	1065	1261	174	847	371	412	400	655	478	1395	668	89	67	87	254	518	376	350	680	551	277	571	494	238	462	302	301	599	505	217	244	324	465	442	715	325	379	469	338	351	372
856742.RPN3	1054	1037	1273	1038	891	780	1195	1046	1049	1130	361	1101	575	989	883	1123	625	912	840	259	255	287	712	1249	896	904	1119	905	1499	915	1965	679	1094	798	902	1063	1119	744	798	801	971	880	1017	1099	1078	1033	834	881	864
856743.SRB4	247	197	293	220	185	175	246	247	288	299	115	353	191	168	179	244	202	408	309	150	139	164	132	266	180	181	221	198	298	208	379	134	257	162	184	305	234	187	145	215	251	218	233	169	229	175	236	291	284
856744.PRO3	812	831	1076	1140	943	953	1217	986	1353	1382	663	1533	1019	1140	1070	1496	993	2242	1398	339	349	424	880	908	861	777	1091	850	970	1376	1257	973	1712	1178	972	1446	1171	843	750	1074	1033	871	1052	845	1199	991	1134	1067	1102
856745.YAT2	166	133	185	156	134	131	159	85	95	100	14	117	44	153	127	141	37	129	85	56	72	71	124	178	151	90	181	131	203	193	276	105	218	160	114	168	123	103	76	122	138	108	162	122	142	122	75	50	48
856746.GCD11	1987	2018	2529	2251	1530	1470	2134	2180	1948	2099	703	1946	1064	1720	1605	2314	1982	3005	2575	228	226	274	1205	1904	1423	1716	2576	2039	1829	2614	2594	1149	2128	1432	1770	2724	2470	2035	1559	2716	2353	1943	2468	1839	2954	2158	1586	1583	1527
856748.CHO1	652	742	847	865	539	571	791	698	2388	2487	1374	2087	1713	1428	1402	1853	632	919	819	501	505	635	830	671	713	421	444	424	1396	869	1693	2124	3659	2673	837	2277	956	389	380	408	615	573	605	385	515	475	538	647	652
856749.GAL83	359	354	584	367	235	194	348	665	535	581	95	566	187	318	292	450	385	1421	551	151	138	178	208	382	349	306	498	361	258	387	406	180	432	308	275	358	385	240	254	320	379	292	436	338	406	383	472	426	460
856750.MIG3	52	59	77	71	30	43	54	64	71	60	18	149	38	75	65	89	168	376	195	26	26	30	72	106	82	19	45	21	122	224	193	24	52	44	56	83	69	90	49	101	78	71	81	18	93	28	54	67	50
856751.SMB1	400	413	477	359	351	324	394	366	353	298	95	291	156	224	185	272	385	690	425	65	63	88	216	289	273	262	271	265	331	315	385	254	331	269	316	390	368	387	286	411	420	361	384	257	423	259	356	299	337
856752.CHZ1	355	398	391	283	254	336	307	338	343	323	259	243	214	316	254	292	616	889	626	298	294	331	243	384	247	307	313	267	260	272	247	233	289	191	336	272	326	182	232	191	310	291	253	414	405	318	462	492	502
856753.YPT31	939	1060	1509	1279	824	951	1385	1112	1074	926	637	1101	716	826	701	1210	763	2029	1084	254	255	253	867	1361	1242	868	1322	1027	911	1356	1305	681	1406	995	904	1088	1304	824	778	1168	1119	953	1250	873	1366	1124	827	888	852
856754.FIR1	142	133	167	93	125	147	122	138	114	118	44	144	54	74	72	77	119	209	161	36	37	51	130	220	175	107	128	107	125	120	174	69	96	66	93	120	91	95	69	91	173	171	169	67	134	68	139	159	149
856755.ZRG8	105	74	128	57	40	42	51	101	161	135	39	167	66	83	65	95	80	99	113	116	148	140	42	93	52	65	118	88	85	82	138	31	81	71	41	68	58	45	55	45	83	92	97	85	79	108	141	156	168
856756.None	148	139	235	213	99	107	130	186	231	243	138	205	211	224	262	416	238	876	294	51	50	68	118	203	186	245	438	315	162	308	245	138	230	188	206	310	336	154	140	223	177	150	182	110	182	153	226	253	239
856757.EDC2	317	376	400	233	159	200	187	483	894	902	272	624	370	387	321	413	252	716	382	132	143	143	481	445	424	318	377	312	849	564	1026	422	558	378	255	324	258	329	233	338	323	292	310	224	164	207	436	464	496
856758.ARB1	3094	2815	4413	3170	1999	1780	2819	3165	2865	3016	955	2539	1544	2272	2394	3363	2771	5653	4109	844	889	981	1944	3103	2476	2559	3622	2814	2594	4744	3977	1672	3071	2201	2908	3875	3639	3309	2733	4129	3411	2860	3606	3056	4686	3523	2585	2828	2665
856759.PHM8	44	51	79	82	26	34	34	39	75	59	22	91	47	68	39	68	47	34	54	491	411	488	22	39	20	52	39	39	56	49	65	57	80	56	32	40	32	40	32	34	46	59	51	54	33	44	88	93	101
856760.KRE29	113	118	140	74	83	62	75	75	69	83	36	64	80	52	61	55	50	79	73	10	10	16	53	60	49	66	71	66	59	67	90	51	95	58	74	81	72	68	54	78	87	69	74	58	102	80	61	46	63
20098144.FMP49	0	0	0	0	0	0	0	0	0	0	0	0	0	0	0	0	0	0	0	0	1	0	0	0	0	0	0	0	0	0	1	0	0	0	0	0	0	0	0	0	0	0	0	0	0	1	0	0	0
856761.HVG1	28	21	24	19	13	10	31	5	5	8	8	16	6	29	25	26	6	10	9	0	0	0	26	25	15	10	10	17	34	31	48	14	48	25	14	15	20	6	11	17	20	13	15	9	17	23	3	10	4
856762.None	16	18	25	30	14	14	21	3	11	23	1	20	3	13	11	18	8	29	9	3	0	0	10	21	20	2	9	9	36	28	44	12	27	21	5	22	24	6	2	13	20	11	3	7	18	25	4	9	8
856763.GLN3	90	91	149	118	56	60	99	97	114	106	33	96	55	107	130	176	49	89	74	21	18	25	60	116	90	116	160	115	149	158	245	65	129	85	104	182	148	83	65	104	157	127	185	86	122	99	76	63	70
856764.YEN1	162	157	262	148	88	68	113	89	129	115	30	131	87	156	174	219	70	146	100	119	57	52	77	222	153	139	219	173	235	234	360	123	248	154	109	209	185	124	98	162	168	130	172	120	173	157	97	129	115
856765.MXR1	332	377	372	281	266	275	372	197	206	151	157	230	152	207	189	228	120	207	119	137	212	200	217	288	207	135	157	145	589	204	724	130	182	134	194	235	225	181	199	167	143	136	149	253	344	220	298	315	297
856766.SAH1	4719	4317	6120	6136	3445	3291	4921	6038	9643	10694	2790	9703	4920	7006	6913	9404	6600	10457	8584	460	429	528	3172	4708	3842	4382	6292	5017	4804	7608	6503	6088	11756	8244	5742	9934	7466	4399	4193	5438	6344	5317	6855	4997	6337	5611	4738	4912	4922
856767.ERG28	1646	1821	1616	2785	2666	2890	2457	1647	2720	2114	6777	3895	5754	3560	3487	3704	2028	1231	1791	1112	1285	1363	2947	2195	1830	2376	2136	1876	3073	1846	2960	6582	7735	5816	3321	3656	3245	2542	2749	2269	3237	2947	2519	3657	3623	2970	4296	4655	4352
856768.MEI4	22	17	12	26	13	11	20	2	6	7	1	13	2	11	10	19	11	10	21	15	13	17	21	34	24	8	9	5	22	8	27	11	14	14	7	13	8	5	8	5	23	13	22	11	3	7	11	14	24
856769.ACA1	228	193	255	188	86	82	106	319	395	446	151	282	191	299	225	311	278	481	377	309	307	307	53	119	83	340	531	371	62	98	88	104	161	114	171	164	234	92	195	132	441	376	499	284	293	347	420	448	436
856770.SPO73	50	67	74	130	76	97	87	57	41	45	31	38	34	72	69	94	15	29	18	21	10	9	127	125	110	74	98	102	147	70	185	153	201	182	87	122	113	54	81	78	143	140	143	108	82	96	67	73	99
856771.SAP1	161	180	262	198	102	119	159	234	254	264	57	205	92	143	116	221	119	314	176	20	18	31	92	179	138	130	208	165	142	216	223	77	174	106	124	206	168	104	102	151	180	125	183	111	125	156	111	121	125
856772.CAJ1	715	709	963	881	552	558	798	784	818	844	370	770	451	863	820	1207	706	1336	868	407	451	446	635	1023	754	682	854	714	1008	1047	1310	732	1062	828	821	1026	1092	603	571	760	780	621	852	751	810	821	657	621	639
856774.ISD11	582	619	685	855	785	882	927	421	648	489	463	576	496	460	429	629	307	273	335	611	642	766	779	845	706	352	424	355	879	597	1025	822	1069	836	552	579	721	506	488	604	699	682	641	562	507	463	521	542	512
856775.TPA1	1188	1060	1390	1097	845	730	1112	1171	902	957	350	691	586	800	724	1077	1001	1492	1328	548	524	622	581	940	785	884	1219	980	910	1283	1373	611	1160	774	939	1396	1187	894	874	1183	1457	1261	1595	1005	1457	1114	708	872	726
856776.RSM18	337	402	446	335	380	389	430	480	559	529	272	527	356	212	252	269	543	741	635	76	62	90	239	411	364	182	202	196	278	269	355	291	440	335	222	244	258	194	251	206	379	273	293	378	368	319	428	429	456
856777.JHD1	111	91	144	113	74	67	81	226	246	247	117	326	217	95	82	114	141	323	207	308	331	358	80	129	106	84	118	87	171	125	215	62	131	97	77	117	115	85	62	100	106	86	101	71	88	69	260	229	236
856778.HOM3	866	761	1080	783	567	610	766	731	734	660	113	648	204	611	589	879	673	1168	885	72	87	109	242	458	332	765	1206	862	632	858	917	397	811	509	582	869	795	753	874	865	963	716	933	1307	1751	1405	871	912	857
856779.PIC2	70	80	114	112	81	84	134	62	398	387	61	454	112	640	619	933	51	100	70	123	143	146	112	189	163	53	70	51	233	143	384	446	820	613	51	93	77	24	154	48	193	208	224	214	65	232	292	289	286
856780.None	275	221	190	133	149	192	191	130	304	302	60	107	95	704	710	673	146	48	117	23	22	22	203	142	108	31	13	15	940	118	786	269	256	190	82	253	78	20	284	24	1315	1295	912	497	139	404	106	126	161
856781.GIP2	30	34	66	28	21	30	37	55	42	38	5	43	13	36	23	60	21	42	21	18	9	12	20	37	31	24	29	22	38	32	70	45	77	64	17	33	19	9	14	19	35	9	32	26	22	16	39	44	34
856782.HIS1	2101	2116	2550	2468	2173	2098	2404	1075	1572	1412	1307	1102	1724	2153	1971	2648	574	687	611	1673	1777	2002	2416	2333	2280	2881	3520	3039	2510	2937	3250	1683	2689	2087	2274	2568	2665	1597	2167	1801	2144	1798	2150	3480	4102	3297	1329	1382	1310
856783.FCY2	4346	4082	5702	3705	2956	2648	3920	5338	4139	4027	2153	3285	2954	1490	1438	2045	3568	9687	5129	7763	8512	9832	3074	3493	3321	3247	4570	3539	2137	5310	2991	1641	2777	2034	3000	3470	3934	4851	3194	6139	4682	3585	4710	3083	5433	3315	5095	5320	5403
856784.RPL34A	5315	5971	5229	4804	5966	7010	5832	5307	5711	5290	7311	6019	6754	3757	3674	3884	4933	4620	4848	852	830	838	5198	5215	4290	4677	4669	3906	1983	5275	2029	5064	6678	4734	5138	4774	5118	4956	4721	4774	5508	5224	4198	5188	6065	4426	5357	5582	5443
856785.HMF1	701	750	684	616	727	748	551	971	992	1033	998	1139	1165	925	820	823	517	713	502	216	247	268	534	383	309	525	507	456	383	608	375	798	821	639	614	707	612	672	612	595	558	535	421	686	698	528	849	869	886
856786.PET117	69	91	125	102	138	175	165	153	202	198	100	268	114	96	71	111	115	229	116	63	61	102	68	128	124	53	54	73	44	73	53	90	126	84	63	65	66	45	89	30	99	72	81	134	142	149	138	140	161
856787.PCL6	181	234	319	227	151	152	226	269	320	365	100	334	163	198	188	314	168	426	246	309	304	306	119	253	196	135	216	159	191	288	252	132	241	177	221	242	235	130	136	191	209	189	193	196	297	224	241	274	256
856788.FCY21	147	152	227	163	95	66	122	251	236	240	74	155	108	131	122	174	96	249	174	115	80	93	54	98	65	145	230	160	64	169	114	49	113	57	128	203	179	145	113	215	139	138	198	118	165	172	116	135	96
856789.FCY22	88	78	127	88	66	44	75	116	86	107	7	80	35	39	63	72	77	242	130	11	5	16	18	44	39	63	129	98	38	71	49	34	57	28	58	107	106	91	53	122	118	88	117	76	99	64	61	77	69
856790.CEM1	300	276	424	352	277	264	345	185	152	146	42	180	65	245	218	343	136	302	167	28	34	31	215	330	299	204	321	280	97	331	127	358	642	471	270	334	304	276	219	486	439	347	485	248	381	287	160	153	124
856791.GPP2	368	358	460	448	203	185	282	501	469	372	156	615	260	403	401	543	225	397	228	72	81	103	357	461	346	121	166	112	404	461	452	395	639	479	152	230	272	348	293	353	1182	1031	1209	302	295	356	1391	1354	1319
856792.THO1	520	492	623	601	478	548	603	780	847	968	695	488	845	494	512	672	434	738	484	391	435	453	546	623	528	389	587	439	454	643	677	420	735	509	524	626	625	451	466	451	603	571	643	668	821	720	666	646	702
856793.VHR2	365	267	388	219	127	138	177	737	478	418	140	258	171	102	139	178	236	402	351	213	257	251	154	288	213	251	309	248	290	408	421	88	178	96	155	272	187	344	176	389	428	338	403	80	249	100	483	540	542
856794.ICL1	104	103	169	89	60	45	99	90	112	78	37	78	64	65	79	110	27	55	43	100	101	139	100	170	124	78	107	116	177	186	266	65	124	100	65	127	123	39	66	82	128	96	105	89	108	125	55	72	84
856796.RRT13	30	29	37	37	29	25	45	0	0	0	0	0	0	26	33	52	2	10	13	10	13	6	34	35	29	41	55	26	104	35	113	40	94	60	16	36	34	18	22	22	25	33	34	22	40	25	32	39	29
856797.RGI1	36	29	35	58	53	57	61	104	402	522	16	102	109	304	274	297	2	4	2	6	10	23	6	15	12	29	28	23	80	48	103	362	502	356	41	52	42	20	91	20	82	72	79	116	35	93	55	65	80
856799.MOT2	371	278	486	428	246	214	331	450	334	318	79	343	134	380	344	523	309	659	425	43	55	70	111	351	197	286	506	374	298	510	448	178	379	251	347	597	480	291	230	402	424	415	519	300	492	365	386	438	415
856800.ARG5%2C6	209	211	314	244	165	150	213	503	691	583	160	640	291	225	213	351	625	819	807	381	360	405	273	385	293	343	439	342	789	435	1099	389	826	595	223	385	265	235	213	265	432	379	442	271	516	348	698	739	718
856801.RNR1	1358	1208	1922	1444	879	768	1348	1565	954	1022	301	947	521	619	597	942	899	2467	1356	267	288	306	688	1029	929	1170	2115	1596	782	1631	1054	449	801	619	1207	1801	1714	1624	1195	2267	1359	1004	1522	1252	1699	1548	833	968	919
856802.TDA2	228	258	272	245	267	354	310	338	425	441	421	386	518	262	226	293	200	679	245	66	102	92	337	371	310	186	197	180	324	268	378	351	507	385	233	244	268	188	202	211	250	220	193	227	202	196	231	212	199
856803.VTC1	788	620	842	918	710	996	878	1030	1234	1066	1369	1171	1402	716	707	952	713	674	671	921	971	1135	901	1179	964	357	586	425	879	1077	1186	569	1060	682	552	499	678	786	837	803	1110	954	1082	1083	931	1023	1308	1341	1339
856804.ALD5	443	416	659	1293	396	418	677	724	918	1057	371	434	632	507	486	839	408	864	519	180	141	162	748	1375	1085	840	1334	973	647	1392	1078	632	1337	893	1238	1683	1935	573	591	890	635	563	798	730	1185	976	719	723	738
856805.RPS24A	9561	10623	9149	9210	11695	12902	10672	8457	9407	9078	11600	8936	10559	7056	7388	7597	7914	4269	6554	1622	1606	1980	10157	8773	7564	9864	8415	7243	5335	8645	4838	10123	12034	8797	9559	9557	9514	9641	9229	9432	10268	9978	7832	10018	10905	7917	7478	7873	7551
856806.YOS1	533	523	496	566	627	867	621	368	497	413	628	342	419	438	392	472	363	280	294	122	108	133	906	658	713	369	341	281	570	462	515	626	637	424	464	288	386	489	442	365	699	596	494	559	449	379	511	610	541
856807.PTP3	189	181	292	191	148	114	196	253	116	132	9	153	47	88	97	143	93	126	129	238	247	247	83	161	108	139	179	128	165	230	201	81	138	99	142	219	201	201	135	202	249	238	300	159	226	166	203	235	222
856809.None	65	59	103	119	42	58	92	55	80	114	96	36	113	119	105	170	270	634	399	264	229	287	77	82	86	83	107	103	146	160	270	124	233	167	71	151	128	83	76	110	94	70	97	78	137	105	2187	2330	2209
856810.MRX1	257	244	371	154	134	121	204	118	125	131	86	55	114	206	239	308	128	203	149	304	239	328	111	204	146	115	158	125	211	188	252	95	167	146	150	172	194	152	138	203	275	222	260	153	212	182	170	156	173
856811.ICP55	201	134	181	187	123	102	138	244	293	294	64	294	113	192	186	240	209	421	292	89	115	92	112	198	161	107	151	139	177	158	290	183	261	236	140	195	145	85	109	103	200	183	215	203	239	232	165	170	178
1466536.None	2	0	0	1	1	0	1	1	0	4	1	0	0	1	4	0	2	2	2	0	1	1	1	1	0	0	0	0	7	0	0	4	0	0	0	0	0	1	0	0	0	0	3	1	1	1	1	3	1
856812.None	39	55	41	20	32	37	28	113	130	131	42	62	60	56	36	68	23	50	31	13	27	24	27	46	19	34	28	15	47	31	40	22	30	29	21	20	29	15	26	11	40	37	34	44	36	37	93	72	82
856813.AIM9	342	374	464	397	252	252	382	395	425	404	53	518	125	399	389	553	316	614	439	49	68	79	181	417	296	307	357	330	349	518	520	191	369	248	364	619	443	224	283	302	340	286	368	456	553	495	382	365	379
856814.SER3	252	229	334	692	252	219	430	700	606	655	355	710	535	336	293	414	783	1194	989	54	62	62	256	448	306	1148	1634	1290	238	154	388	336	591	435	602	436	799	413	568	501	1824	1605	1916	977	1469	1080	1022	999	967
856815.UTP7	744	686	1008	664	489	406	660	541	360	329	49	317	116	422	420	609	739	1548	953	41	33	45	175	408	334	504	796	584	319	743	500	231	405	289	562	788	802	682	548	979	808	651	980	531	1146	587	458	451	443
856817.GET2	345	337	555	448	255	241	459	421	470	450	152	435	237	273	278	412	375	1239	471	54	69	83	280	306	310	350	565	434	290	584	441	193	378	262	326	404	492	378	255	472	423	395	515	349	440	373	383	412	370
856816.None	9	9	6	0	2	1	4	0	0	0	0	0	0	1	3	0	4	8	5	0	0	1	1	2	1	5	1	4	1	3	1	1	1	2	1	5	2	1	7	4	1	5	1	2	3	7	1	3	3
856818.None	3	2	11	6	1	1	3	0	0	1	2	0	0	1	1	3	0	0	0	0	0	0	0	1	0	0	1	0	0	3	0	4	1	3	4	1	6	2	2	3	0	0	1	3	3	3	2	0	2
856819.ILV1	1019	945	1365	1020	707	552	960	905	852	767	142	691	254	906	899	1377	662	842	859	226	222	275	390	587	482	1031	1313	981	596	1289	817	395	738	541	972	1497	1180	1054	951	1360	1305	1106	1389	1073	1753	1085	910	928	912
856820.AIM10	145	127	151	131	125	126	156	248	277	270	72	412	106	107	117	148	287	750	413	93	120	125	119	185	148	60	111	52	138	140	160	121	201	128	82	129	110	65	94	76	107	103	114	123	150	169	186	203	191
856821.SBH1	999	1000	1116	972	786	838	880	943	1083	947	763	1077	988	913	1057	1193	658	939	741	150	160	208	837	972	777	892	882	839	857	1006	956	792	1125	720	1035	950	1151	852	807	902	1118	944	925	1005	1015	848	744	823	766
856822.DOT6	443	459	621	468	312	266	431	436	315	372	9	285	82	431	433	599	158	468	216	23	36	31	200	322	272	373	629	455	317	599	382	234	408	334	333	560	499	334	287	416	564	387	529	413	528	427	195	193	203
856823.PTC2	445	404	734	562	294	261	447	884	786	891	151	623	257	383	403	676	418	1428	658	465	484	533	252	352	276	340	615	492	255	717	457	314	636	475	437	417	651	375	329	600	554	537	746	394	563	556	503	537	510
856824.TRP2	731	682	1051	867	548	473	745	517	677	677	261	854	381	912	894	1293	428	777	638	239	251	274	527	816	652	912	1428	1015	1053	1111	1408	452	952	693	725	1036	975	718	619	922	963	811	1001	804	1090	872	623	670	684
856825.MET6	1249	1097	1407	863	462	397	657	739	2111	1780	1201	2746	1585	2838	2658	3751	303	402	375	151	156	150	738	970	741	568	815	616	1424	1243	1873	1271	2391	1451	762	3853	1059	271	1205	339	1317	1175	1385	2414	2811	2551	1474	1612	1641
856827.IES5	342	422	433	288	321	349	299	362	307	346	193	323	286	255	311	362	236	681	296	349	313	384	394	346	354	195	208	160	368	329	458	305	362	316	254	304	275	201	220	236	246	203	185	211	237	204	292	286	294
856828.TSC11	229	181	343	241	175	155	241	254	320	314	51	291	95	240	179	302	189	338	262	454	452	438	161	266	164	172	294	254	222	289	303	124	209	168	200	195	256	176	166	209	207	201	258	205	267	249	248	261	253
856829.AIM11	102	119	153	100	93	121	164	212	213	257	86	256	142	84	84	91	184	386	221	23	23	31	97	85	83	61	77	54	74	59	110	62	111	62	66	71	79	52	68	62	69	46	74	87	86	72	125	117	124
856830.PUP3	1115	1164	1718	1528	1066	1061	1584	1406	1342	1400	529	1322	845	996	997	1650	638	2329	876	84	84	94	1112	1389	1298	982	1338	1110	1295	1466	1853	781	1454	1108	1059	1091	1498	742	1008	1141	982	805	1113	1361	1531	1759	1042	963	969
856831.RAD51	578	586	1044	527	270	226	465	700	560	528	61	472	168	394	397	645	298	903	483	46	42	71	167	187	185	378	633	464	333	640	540	213	462	360	346	695	599	399	377	658	653	483	806	445	675	552	441	506	476
856832.SHC1	27	26	33	30	14	9	9	104	85	105	13	20	28	76	77	119	20	18	21	10	12	13	17	35	27	23	22	14	122	63	175	145	207	163	27	80	53	14	16	15	27	13	29	6	25	22	14	7	9
856835.UBP9	100	116	162	77	75	79	98	71	85	89	27	75	41	144	123	165	50	109	59	23	14	17	39	107	64	83	134	86	83	85	116	71	145	130	84	161	139	56	68	95	137	104	151	93	127	120	70	69	65
856836.PRS2	416	436	608	470	368	345	515	796	678	769	245	534	410	319	299	417	394	1280	565	244	229	296	231	291	217	295	499	356	236	451	356	256	472	350	361	415	513	466	315	550	462	380	532	366	657	373	518	507	534
856837.UBC6	489	456	532	409	367	331	386	223	340	297	175	360	186	381	305	431	321	691	407	87	69	61	239	452	357	424	577	458	287	515	373	167	301	170	453	466	465	418	300	446	463	412	474	385	473	389	426	397	428
856838.AST2	95	90	127	94	67	89	94	134	157	140	60	195	111	90	84	129	107	186	151	45	50	62	60	100	55	41	94	69	62	113	93	41	109	74	76	76	88	61	58	65	68	70	105	71	80	77	126	90	117
856839.RPS8B	8254	8729	8328	7618	11220	11431	10734	9511	9599	11198	11392	6435	11815	7659	7711	8390	8151	4469	7077	3042	3103	3188	9894	8723	7702	10282	9858	8554	3348	6704	3612	8789	10971	8075	10340	10535	10672	10603	7783	10543	10843	9687	8647	7689	8759	6596	6949	6995	6665
856840.SSA4	133	166	205	125	119	101	143	185	243	230	70	274	119	109	92	176	237	540	326	210	182	206	99	133	97	117	187	123	151	165	215	76	114	107	96	142	138	53	99	78	133	129	144	141	126	205	299	300	274
856841.RTT105	59	60	98	79	77	61	107	70	67	60	32	54	41	77	77	112	27	42	31	81	2	6	61	108	72	72	86	52	94	88	155	89	164	120	55	100	71	46	49	63	69	81	88	65	117	62	51	61	48
856842.NUP157	684	610	938	639	429	432	630	731	732	780	282	810	423	519	538	840	748	1374	1072	454	504	513	253	565	373	601	928	722	603	738	891	343	641	467	537	779	785	529	485	712	606	505	700	497	743	585	774	837	785
856843.MAM1	18	18	12	9	2	14	7	0	0	3	0	0	0	0	5	2	0	0	0	2	0	2	7	5	6	3	2	4	4	5	4	8	8	14	4	6	6	5	3	4	2	8	1	5	6	4	0	0	0
856844.GLE2	383	405	630	523	288	326	499	407	399	389	113	338	181	367	346	591	284	443	367	65	75	103	316	415	295	374	628	476	481	599	547	256	481	370	401	613	576	348	312	459	430	361	531	389	495	451	285	305	299
856845.FLO8	170	165	215	147	94	63	173	201	111	104	15	96	30	111	141	209	104	198	145	14	12	5	97	183	127	147	226	190	103	191	208	67	144	98	111	209	183	101	133	158	188	159	248	146	195	188	113	134	99
856846.KAP123	1602	1421	1941	1500	1164	967	1536	1081	1032	1079	318	1000	522	991	1016	1313	1893	2252	2450	293	374	319	620	970	702	1586	2010	1589	1334	1955	1803	713	1038	769	1456	2096	1805	1821	1304	2187	2117	1681	2132	1196	2532	1266	1107	1170	1119
856847.SWI4	208	256	271	219	116	135	188	207	113	137	55	167	54	122	127	162	126	136	135	34	15	34	97	207	132	173	204	198	112	146	192	101	161	127	178	241	177	106	121	147	237	175	201	170	185	168	154	161	148
856848.LSM4	494	507	610	514	402	492	475	560	449	543	332	316	434	314	322	373	333	532	341	62	64	68	292	513	391	454	542	443	271	292	373	245	336	225	445	443	476	383	353	370	473	428	456	450	590	431	386	366	396
856849.TMN3	334	271	483	374	298	297	462	461	410	395	335	475	479	208	208	356	347	663	453	147	128	137	323	660	509	237	422	331	488	491	684	199	396	300	251	401	404	321	241	484	392	347	486	286	449	368	310	403	331
856850.BOI2	357	358	553	327	248	225	405	420	350	372	94	247	154	227	203	304	263	693	441	71	54	73	200	336	304	316	592	452	260	449	387	119	302	192	282	356	343	292	212	408	433	318	401	241	374	307	255	234	265
856851.SPR6	221	215	264	257	146	149	141	114	108	109	28	76	70	193	202	285	101	64	67	80	97	137	234	242	273	162	252	146	228	355	292	282	423	314	265	365	311	190	196	249	212	234	236	184	232	191	72	89	72
856852.SLX8	112	101	168	197	82	77	100	39	46	38	12	45	27	179	183	294	48	99	73	11	3	0	127	199	194	141	225	164	158	214	222	160	259	255	128	229	236	146	102	195	161	157	168	158	136	161	64	43	62
856853.RPL23B	12514	13364	13053	14295	19629	21447	18803	10929	15248	13359	16564	12762	17041	9431	8282	9748	8558	20140	8730	3347	3422	3694	23818	13092	15276	11063	10647	9280	8861	13512	9518	21775	25347	19448	13272	11943	14049	13598	13326	13953	12519	11287	9957	14396	14747	11725	10109	10493	10043
856854.SHO1	342	351	442	354	311	329	454	363	333	394	429	390	442	271	309	423	272	451	299	89	96	99	296	523	389	268	252	272	402	416	501	257	436	285	338	479	384	304	251	341	380	300	349	318	429	318	207	260	243
856855.AVT6	107	118	178	115	95	83	176	182	280	275	97	210	163	102	77	158	41	165	64	44	56	36	100	119	108	78	151	136	123	223	219	74	191	135	78	121	130	50	61	100	116	85	151	108	116	145	141	132	142
856856.SCS2	1060	936	1269	980	893	1003	1225	1031	1093	1253	503	1115	685	700	656	1003	665	1925	1086	424	500	544	690	844	774	696	1138	839	768	1328	1044	606	1405	919	801	883	958	890	746	1082	1064	1030	1183	798	1075	1029	1321	1366	1292
856858.None	14	16	17	23	19	20	13	5	3	1	0	0	1	9	4	5	1	1	0	9	9	14	9	10	14	9	14	9	7	10	19	11	31	18	3	5	15	15	11	8	18	19	12	5	2	3	5	5	4
856859.GLO3	945	941	1374	1073	855	753	1145	1086	1191	1229	366	1156	712	772	742	1148	889	2023	1263	307	298	312	667	1279	967	921	1284	1043	995	1211	1501	521	909	607	858	1285	992	831	705	1132	1140	957	1176	734	1296	897	950	964	974
856860.YCK3	369	304	468	324	232	221	304	377	267	332	24	318	81	215	233	328	391	1002	586	55	44	58	105	228	148	265	364	312	174	327	297	140	240	189	230	369	312	227	262	366	319	273	426	292	512	375	350	339	396
856861.DSE1	585	534	674	414	286	251	352	544	457	547	154	371	249	428	462	570	270	354	358	130	138	165	11	42	35	300	341	337	423	539	606	302	514	379	488	623	550	380	377	427	501	443	572	543	497	591	233	223	250
856862.RSP5	815	828	1291	1384	660	520	1111	1602	1566	1590	438	1538	825	1157	1150	1980	868	2056	1357	161	177	194	661	1375	979	837	1404	1116	920	1563	1434	675	1421	959	1071	1822	1693	1000	855	1498	1143	1008	1464	988	1711	1247	1062	1104	1101
856863.NSA2	1401	1490	1711	1272	1151	1198	1392	1203	1103	1131	511	870	687	707	658	877	1528	1586	1693	768	709	862	740	949	795	887	1041	893	788	1298	1123	753	1215	830	1061	1073	1189	1463	983	1690	1300	1123	1194	1087	1569	1041	993	1027	1030
856864.LCP5	637	695	938	611	507	496	708	648	458	407	229	405	286	259	273	388	674	1320	842	201	167	237	243	509	336	439	682	538	411	702	560	210	377	262	512	583	685	684	501	849	753	546	765	539	1008	621	526	484	480
856865.VFA1	122	99	127	91	94	132	137	89	100	98	56	84	64	67	60	72	56	56	48	26	25	45	81	70	63	61	80	44	73	79	71	43	82	59	83	70	79	76	72	85	112	95	80	62	101	72	75	79	76
856866.SAK1	410	346	539	399	256	237	366	495	457	535	95	407	184	276	318	561	372	997	635	292	319	371	148	353	225	434	625	521	263	471	455	197	333	272	360	479	537	465	320	607	605	446	607	415	575	487	465	506	461
856867.COM2	406	411	584	488	393	372	502	443	805	903	275	508	424	718	712	1071	218	315	295	24	22	30	365	764	531	537	856	574	686	637	929	497	899	633	426	658	595	347	467	421	409	319	375	684	537	768	242	270	258
856868.RPS26B	12778	14339	12731	12640	18430	20943	17460	11128	16470	13416	28392	15518	22692	9120	8498	8953	12863	12795	11848	4182	4533	5009	14299	14560	12842	10845	10144	8327	6435	10377	5985	17401	20842	15565	12399	9484	12127	12949	12125	12699	12072	11119	8981	13847	14892	11101	10793	11813	11185
856869.PMD1	210	215	315	201	105	96	159	284	198	233	11	113	51	182	177	280	126	314	208	45	30	34	71	157	121	138	292	216	94	210	172	62	150	118	151	192	210	155	159	202	221	173	202	191	253	195	171	173	139
856870.GLC7	1635	1679	2186	2007	1664	1603	2125	1844	2028	2143	791	2100	1137	1421	1355	2051	1278	3280	1673	97	95	112	1516	3131	2274	1386	1843	1446	1979	1694	2603	1287	2271	1613	1580	2255	2110	1498	1357	1943	1796	1642	2028	1470	2094	1602	1519	1518	1609
856873.None	318	314	413	426	333	344	420	350	348	354	210	250	276	361	366	458	192	331	202	65	72	69	425	537	466	270	328	252	307	346	384	308	462	377	336	364	361	154	232	160	303	242	300	308	342	368	225	264	217
856874.None	48	37	27	35	53	112	85	0	0	0	0	0	0	1	0	1	0	0	0	0	0	0	2	6	4	1	0	0	5	5	12	7	6	4	0	0	1	5	1	5	0	1	0	5	0	3	0	0	0
856876.GDI1	792	752	1058	1110	636	547	868	1313	1328	1463	532	1052	824	936	922	1372	514	792	657	487	460	566	558	1186	953	964	1343	1081	932	1107	1239	599	1028	737	962	1446	1153	529	600	697	841	763	986	786	982	874	804	878	860
856877.None	129	160	147	87	83	102	94	61	47	25	37	34	23	49	49	46	52	65	45	15	12	11	42	68	46	110	70	49	65	56	57	38	52	33	78	74	67	118	99	116	129	87	82	79	111	49	32	50	39
856879.None	9	0	5	35	164	206	159	29	23	51	0	0	1	0	0	0	2	30	5	0	0	0	7	9	9	0	0	0	1	0	3	0	0	0	0	0	0	0	0	0	0	0	0	56	36	46	0	1	0
856880.None	0	0	0	0	0	0	0	0	0	0	0	0	0	0	0	0	0	0	0	0	0	0	0	0	0	0	0	0	0	0	0	0	0	0	0	0	0	0	0	0	0	0	0	0	0	0	0	0	0
856881.None	0	0	0	1	0	0	0	0	0	0	0	0	0	0	0	0	0	0	0	0	0	0	0	0	0	42	28	36	5	0	2	0	0	0	0	0	0	0	0	0	0	0	0	1	0	0	0	0	0
856882.RTR1	148	158	203	131	122	99	147	101	107	112	84	137	78	160	155	245	90	72	116	29	27	38	192	254	194	76	126	95	181	175	284	198	236	183	121	177	163	104	99	121	166	147	143	105	110	104	139	111	133
856883.EMP65	203	202	246	188	203	157	224	196	154	201	64	120	105	177	203	292	85	171	107	64	60	64	110	212	170	139	200	133	220	241	362	179	278	198	164	259	196	134	127	166	198	183	185	136	212	145	86	71	75
856884.COX15	442	382	589	477	267	245	433	513	622	642	184	806	333	771	677	1031	490	664	546	43	43	34	511	748	583	387	498	406	1080	751	1445	827	1551	1040	389	820	503	211	335	216	845	691	877	499	446	535	519	547	558
856885.MAG1	65	101	117	53	33	17	44	83	114	98	39	130	52	87	68	102	50	47	46	30	33	44	45	51	45	56	85	63	60	29	76	19	37	29	78	32	50	25	42	19	61	65	52	72	45	40	74	66	72
856886.DDI1	250	271	413	322	184	185	267	318	323	275	86	448	123	253	289	442	207	573	259	226	239	279	133	228	144	322	468	348	246	288	389	116	228	159	276	342	354	182	205	224	274	253	274	252	312	299	296	320	304
856887.UBP5	616	592	870	759	255	201	376	346	553	652	111	558	180	585	524	864	167	395	245	210	180	209	229	578	393	671	1069	848	539	779	844	306	712	420	619	864	975	446	351	581	673	479	707	389	316	460	281	318	279
856888.FTR1	916	957	1494	1782	865	873	1418	1283	1199	1121	944	1791	1345	302	317	460	428	1414	727	184	187	223	406	444	494	1555	2497	1990	576	1540	862	342	841	516	1588	1760	2360	1142	791	1647	1224	1009	1493	921	1462	1228	559	587	625
31009439.None	28	44	35	62	31	13	24	2	6	5	4	7	4	1	1	3	1	2	1	0	1	2	8	7	5	30	26	19	19	26	5	11	21	18	59	46	75	13	20	15	30	35	30	7	8	22	1	3	2
856889.LSM5	4	4	2	2	2	0	0	11	8	4	12	8	3	1	3	2	5	4	2	8	3	5	3	7	5	5	4	1	4	5	0	1	2	1	1	1	1	1	2	3	2	5	2	3	9	2	4	3	1
856890.SCC4	189	174	275	263	166	134	210	291	288	319	64	190	125	144	112	221	138	527	226	71	88	105	113	149	140	123	208	162	144	286	276	98	179	115	154	254	260	165	106	223	164	146	209	111	174	147	138	178	169
856891.SPT15	1234	1314	1388	1095	1008	1083	1210	1170	1329	1288	1109	1194	1321	761	767	1000	871	1829	1090	290	290	372	948	1464	1084	936	1178	938	1034	1175	1226	689	1101	861	985	1084	1017	1137	961	1272	1084	960	1035	974	1363	950	836	839	862
856892.PEA2	225	229	341	310	253	227	303	130	103	110	60	137	64	195	184	276	107	117	127	50	50	47	203	440	303	199	261	282	390	294	448	232	355	251	293	432	363	249	195	267	224	277	219	221	295	213	142	148	132
856893.SPI1	39	37	51	98	25	46	40	34	92	134	7	26	23	126	144	187	4	3	1	6	3	10	25	41	27	61	109	63	89	54	133	219	329	256	58	103	82	19	34	30	58	64	66	19	21	23	13	18	20
856895.UBP3	584	443	756	495	337	301	472	813	553	606	98	593	213	428	395	537	643	1354	903	73	95	79	157	375	275	533	945	640	368	649	548	211	387	272	444	750	567	470	371	618	596	501	646	473	759	478	681	764	701
856896.None	349	343	587	415	199	146	304	355	436	501	175	391	255	352	360	584	92	407	200	401	409	488	289	282	338	254	543	382	378	720	683	325	651	480	285	513	507	204	198	338	220	161	309	193	255	274	265	263	233
856897.PET122	45	39	88	86	35	31	63	107	110	130	10	105	30	39	23	80	37	221	96	2	3	5	37	34	29	35	92	58	57	116	66	30	65	41	53	57	59	24	30	41	78	36	79	28	52	55	66	75	67
856898.OXA1	377	394	486	376	351	296	472	500	480	483	69	497	145	279	267	434	392	1486	683	27	12	19	178	230	202	253	412	298	232	574	361	235	443	307	278	501	424	244	299	374	487	405	522	463	532	553	300	370	377
856899.BEM2	582	571	779	655	548	482	693	382	527	483	262	512	380	602	533	789	267	440	337	1166	1181	1385	586	1183	829	502	760	538	459	637	683	373	654	486	505	586	617	436	431	564	578	477	588	522	547	572	433	467	511
856900.None	1346	1252	1712	906	936	934	1361	1475	1496	1625	430	1085	824	1078	1085	1371	1436	2982	1900	365	407	458	944	987	832	857	1203	963	1094	1593	1413	884	1341	932	639	1032	838	1250	1109	1595	1373	1144	1333	1266	1800	1276	837	856	848
856901.COG3	247	250	373	280	166	156	299	301	297	301	154	295	216	207	247	364	233	524	285	559	519	559	207	490	329	184	289	247	333	348	508	180	320	237	188	343	356	214	188	244	267	206	258	218	255	259	260	244	250
856903.None	182	168	242	173	191	136	202	261	383	365	55	294	95	215	226	290	169	356	246	72	48	44	109	133	121	167	240	184	78	188	132	172	286	225	121	219	175	129	176	154	166	133	195	286	244	374	330	341	310
856904.BUR6	728	828	829	576	535	543	672	566	516	542	158	290	254	629	588	853	332	591	343	45	30	48	404	701	547	666	873	785	717	729	949	413	573	463	580	626	706	786	562	988	709	668	699	618	829	799	305	269	298
856906.None	31	20	37	9	184	133	179	2	1	0	0	0	0	0	0	0	0	0	0	0	0	0	3	16	10	0	0	0	290	210	351	9	16	16	0	0	0	0	0	0	0	0	0	1	1	0	12	15	8
856907.None	0	0	0	0	0	0	0	0	0	0	0	0	0	0	0	0	0	0	0	0	0	0	0	0	0	0	0	0	0	0	0	0	0	0	0	0	0	0	0	0	0	0	0	0	0	0	0	0	0
856908.SPT2	339	325	505	292	163	141	282	330	339	311	85	382	134	322	284	437	320	531	373	815	848	892	150	345	239	282	476	365	256	448	375	170	315	205	337	448	358	231	208	313	371	266	377	283	380	255	324	347	379
856909.RAD4	115	127	158	113	62	58	112	115	160	182	18	128	69	98	80	157	69	166	101	92	74	102	43	144	105	81	129	105	98	126	143	56	118	57	62	94	108	91	66	127	98	62	87	82	119	134	121	132	119
856910.GCG1	191	200	225	336	235	253	365	146	261	198	95	305	143	288	244	360	145	410	188	319	323	404	334	381	378	233	280	236	309	326	400	349	554	375	227	270	302	211	246	265	283	189	284	269	236	307	329	330	324
856911.CHD1	515	430	710	485	297	293	483	472	462	495	85	517	162	395	410	624	444	892	559	136	145	163	126	336	231	396	685	542	319	540	528	125	281	169	430	573	536	287	294	428	564	435	590	368	496	440	387	449	387
856912.PAB1	3498	3204	4111	3026	2059	2023	2899	4370	3831	4112	662	3885	1370	2465	2437	3353	4746	6254	5660	565	488	643	1054	1778	1290	2991	4202	3142	1652	4096	2237	1353	2661	1736	3002	4243	3817	3724	3043	4476	4563	4184	4552	3277	4634	3531	4285	4413	4287
856913.DNF1	474	412	745	506	266	245	415	471	633	639	160	712	321	410	456	723	297	1052	563	269	236	240	204	462	350	416	698	516	387	623	671	230	502	390	353	416	539	304	260	493	481	347	572	362	487	528	512	456	552
856914.BCK2	299	277	427	240	191	178	288	299	245	328	61	196	120	269	284	451	153	345	201	42	47	27	164	350	244	257	421	320	152	279	257	128	256	203	217	280	327	230	193	298	406	351	459	272	290	361	243	235	182
856915.CCA1	379	421	482	416	329	307	424	357	460	402	266	474	314	239	239	363	352	728	499	113	127	129	277	372	331	364	456	333	383	383	493	226	347	268	375	521	481	330	270	394	397	425	463	263	414	323	423	454	425
856916.RPH1	541	506	885	496	253	207	403	359	232	251	24	290	67	333	332	591	292	498	360	20	15	10	157	322	286	447	691	567	298	690	493	107	271	201	361	560	580	470	346	684	492	356	559	360	626	426	311	359	363
856917.ADK2	101	93	97	75	93	106	98	142	140	162	45	137	100	33	51	77	49	115	71	35	56	46	85	79	87	53	60	59	72	81	115	63	96	70	46	85	94	42	75	38	97	76	72	84	79	62	108	106	104
856918.RAD3	406	336	478	404	290	288	368	359	384	373	155	469	251	238	257	322	446	729	550	174	166	189	176	385	279	251	428	325	282	337	367	166	335	231	264	327	361	367	290	481	483	358	440	283	418	348	389	421	390
856919.BRR2	369	399	550	352	246	240	344	456	460	487	74	557	184	296	279	441	377	859	630	637	678	750	159	285	187	365	511	388	240	354	328	170	333	209	310	410	389	337	283	469	423	344	432	311	405	307	360	353	376
856920.RAD24	123	116	214	125	130	90	135	144	139	121	45	184	75	106	65	162	157	382	187	54	47	61	91	180	161	135	217	170	161	184	267	89	177	122	105	164	174	121	90	160	149	119	177	85	147	104	166	164	147
856921.GRX4	322	412	475	343	490	529	619	282	307	297	154	262	218	320	334	429	377	642	433	277	278	395	453	441	422	152	189	160	455	340	578	480	698	510	182	244	216	259	292	341	425	363	420	341	385	335	433	445	461
856922.TMT1	129	101	164	111	82	97	137	125	159	159	41	82	91	85	96	130	89	145	100	60	46	57	86	111	110	45	88	71	129	134	192	85	122	76	63	59	103	128	108	131	84	92	93	91	127	101	120	121	125
1466537.None	19	38	58	24	16	21	17	0	0	0	0	0	0	10	12	17	0	0	0	0	0	0	13	19	20	11	24	16	50	40	105	8	12	24	17	13	25	11	20	9	22	22	19	18	30	12	0	0	0
856923.ECM32	441	386	587	404	277	246	386	373	298	330	45	260	115	375	345	488	229	452	259	51	40	36	170	411	325	435	686	468	347	562	487	171	334	237	417	596	564	344	298	481	375	276	423	317	493	419	261	248	242
856924.BMH1	4605	4866	6703	6782	4919	4723	7339	4689	6152	5997	2411	6322	3168	5277	5368	8123	3353	6404	4360	488	435	466	5654	6336	5961	5035	7800	5910	5023	7463	7207	3445	6558	4865	5215	6976	7150	4059	4813	5439	4353	3719	4846	6731	8532	8180	4663	4856	4809
856925.PDA1	1850	1694	2366	1663	1133	943	1580	1331	1516	1466	449	1846	723	1602	1562	2217	1549	2903	1822	40	42	63	1631	1786	1517	1586	2344	1803	1916	2711	2406	611	1197	830	1514	2176	1937	1109	1372	1425	1925	1540	2087	1807	2216	2103	1472	1601	1468
856926.DMC1	12	20	19	25	11	5	8	7	13	8	4	18	1	10	5	9	5	5	5	10	17	13	11	4	5	11	7	7	2	8	8	4	21	11	10	4	1	14	10	16	7	5	2	5	6	5	3	7	1
856927.ISC10	185	174	217	175	205	153	164	70	123	138	55	126	103	165	172	250	99	85	109	245	232	262	147	240	161	172	192	160	335	242	459	156	223	163	138	216	199	223	169	194	179	138	162	147	193	184	126	171	190
856928.SLO1	62	96	88	119	65	77	112	36	36	34	16	19	19	85	63	149	30	20	26	8	9	15	67	101	98	63	93	67	148	90	184	74	153	109	66	82	106	84	60	106	84	95	86	80	104	99	33	42	28
856930.None	1	1	1	0	5	1	0	0	0	0	0	0	0	1	2	2	0	0	0	0	0	0	44	45	30	0	0	0	25	26	48	1	0	0	0	0	0	0	3	0	0	1	0	1	0	0	0	0	0
856931.FMP10	192	228	237	105	150	158	204	455	338	397	79	474	145	174	169	227	405	631	424	24	29	25	102	156	118	78	114	85	122	168	142	134	202	154	60	117	74	83	145	107	181	155	166	216	251	177	220	229	151
856932.FAU1	263	280	330	296	338	354	445	478	636	726	519	455	598	225	188	239	204	336	239	262	294	313	321	317	295	165	200	134	384	274	491	309	437	349	192	248	227	205	191	231	210	174	242	196	269	193	286	332	302
856933.TOG1	153	121	195	324	96	113	144	230	438	486	136	420	272	515	479	723	151	421	242	45	42	48	409	831	623	308	446	349	363	500	605	354	708	471	326	681	448	231	166	312	122	121	120	158	102	201	132	145	139
856934.PUG1	17	13	12	50	10	16	30	66	258	209	76	436	163	22	48	44	87	175	95	115	83	118	195	261	248	145	177	148	129	101	209	36	139	23	27	51	53	15	32	26	15	16	12	43	18	43	104	152	182
856935.None	356	312	433	128	69	63	137	0	4	0	0	0	0	71	35	75	43	77	68	173	197	185	344	420	458	52	63	49	591	437	836	71	97	86	44	66	44	59	198	63	68	40	48	389	348	420	50	66	53
856937.None	163	154	213	219	171	173	347	33	194	222	0	79	25	254	262	505	21	51	23	5	4	2	116	122	124	97	158	141	70	103	127	372	844	637	72	139	167	82	34	137	87	72	143	147	190	191	19	24	26
856938.None	0	0	0	23	21	12	15	28	54	62	4	14	12	16	25	23	6	6	9	9	7	9	39	50	55	23	28	21	162	57	200	15	23	21	21	24	19	11	2	16	29	28	24	0	0	0	47	40	54
1466538.None	0	0	0	3	4	1	0	0	0	0	0	0	0	0	0	0	0	0	0	0	0	0	0	0	0	3	1	0	3	4	3	0	2	1	0	0	0	0	0	0	0	0	0	2	0	0	7	4	6
856939.None	13	7	15	1	6	5	4	2	7	7	0	0	0	12	4	9	0	0	0	0	0	0	0	0	0	0	2	2	5	3	4	19	28	19	15	15	6	0	0	0	30	26	26	0	0	0	0	0	0
856940.YRF1-2	1	3	4	27	7	8	6	1	2	1	0	24	3	42	31	42	1	4	1	0	0	2	3	0	4	14	45	26	25	50	60	22	51	55	6	12	13	55	38	84	5	2	9	14	14	15	6	10	6
4594642.None	0	0	0	0	0	0	0	0	0	0	0	0	0	0	0	0	0	0	0	0	0	0	0	0	0	0	0	0	0	0	0	0	0	0	0	0	0	0	0	0	0	0	0	0	0	0	0	0	0
850476.None	0	0	0	0	0	0	0	0	0	0	0	0	0	0	0	1	0	0	0	0	0	0	0	0	0	0	0	1	0	0	0	0	0	0	0	0	0	0	0	0	0	0	0	1	0	0	0	0	0
850477.None	11	10	26	2	31	11	48	83	83	63	0	0	2	3	0	3	20	68	35	0	0	0	14	32	37	0	1	1	44	118	85	7	38	31	0	0	0	15	13	28	0	0	0	29	57	54	17	12	23
850478.None	5	5	4	76	1	0	0	0	2	5	0	0	0	1	0	0	5	11	5	0	0	0	40	66	53	208	337	255	70	152	157	1	11	1	0	0	0	0	0	0	0	0	0	226	364	321	106	133	132
850479.None	0	0	0	0	0	0	0	0	0	0	0	0	0	0	0	0	0	0	0	0	0	0	0	0	0	0	0	0	0	1	2	0	0	0	0	0	0	0	0	0	0	0	0	0	0	0	0	0	0
850480.None	1	0	0	9	7	10	15	0	0	0	0	0	0	5	1	7	0	0	0	0	0	0	3	16	13	0	0	0	6	9	11	6	3	5	0	0	0	23	15	41	0	0	0	14	17	23	0	0	0
850482.COS4	390	417	507	783	683	648	747	275	308	342	280	135	332	1217	1243	1678	480	658	608	204	214	263	922	949	845	2020	2243	1897	886	674	1168	889	1271	981	728	854	882	725	862	871	807	704	769	638	447	572	704	685	714
850483.DDI2	0	0	0	15	8	7	17	2	9	7	7	6	5	9	16	20	0	0	0	0	0	0	15	23	13	12	25	22	31	34	39	0	0	0	8	19	20	14	13	17	14	8	13	4	8	10	0	0	0
850484.SNO3	17	16	20	14	2	4	3	0	7	0	0	7	1	0	0	2	0	2	2	5	6	1	10	15	22	0	0	0	56	100	108	0	0	0	41	31	55	4	0	0	0	0	1	1	0	1	4	8	0
850485.SNZ3	65	65	83	56	14	10	19	21	69	39	8	20	16	14	17	21	7	13	18	1	4	1	41	37	50	27	30	22	301	452	374	27	114	30	26	37	44	14	15	27	9	2	8	13	25	17	2	4	7
850486.THI5	5	5	7	6	11	10	10	6	11	16	9	15	16	10	6	6	9	3	4	1	3	5	1	1	0	0	0	0	0	0	1	0	0	0	25	11	24	6	12	4	4	17	4	40	33	29	7	10	8
850489.AGP3	74	78	130	20	42	45	63	87	111	128	39	82	84	93	88	112	41	175	99	52	38	61	52	75	91	73	126	96	83	95	129	0	0	0	60	134	122	83	61	94	123	98	140	60	69	93	70	82	77
850490.AQY3	31	40	60	6	31	39	77	229	365	378	94	303	161	50	31	65	139	672	256	81	78	79	11	25	26	62	116	75	44	75	83	0	1	0	20	40	52	23	26	47	55	47	82	24	38	37	248	234	243
850491.DAK2	23	15	34	12	20	10	28	116	153	168	9	189	48	27	19	49	148	414	194	28	37	38	5	16	11	21	59	44	8	22	15	0	0	0	25	29	38	31	27	26	12	20	30	10	22	17	142	180	157
850492.ZNF1	9	11	17	21	11	18	29	18	20	21	3	45	11	5	8	16	28	61	37	20	11	34	5	10	1	5	15	16	4	8	6	42	56	37	5	7	18	18	15	18	45	33	42	6	20	8	37	47	35
850493.None	124	95	140	23	22	23	42	62	25	10	0	4	2	16	9	20	353	413	434	4	3	1	5	8	6	33	50	49	8	8	9	21	44	24	28	38	49	98	49	115	91	59	73	70	84	74	118	129	124
850494.ALR2	186	192	333	142	103	88	127	99	183	168	134	347	303	195	228	290	67	224	149	248	203	271	61	142	119	158	236	187	166	215	248	319	661	544	136	263	189	155	228	275	201	162	206	350	401	367	440	442	405
850495.SWP82	243	252	308	219	154	154	213	218	157	169	63	198	109	192	188	244	144	318	228	15	24	11	98	327	171	237	245	221	187	180	236	120	196	165	180	226	202	199	133	282	288	237	333	167	261	185	193	186	177
850496.EMP47	423	466	546	508	449	441	651	530	490	511	410	559	510	426	357	503	308	419	442	40	36	71	406	525	415	330	434	385	529	536	710	356	693	457	365	508	444	395	318	418	429	358	448	331	425	369	396	396	402
850497.RGD2	230	229	295	220	246	256	379	216	153	154	96	240	117	139	144	178	166	321	254	58	53	92	138	299	221	130	183	157	170	203	258	96	164	139	113	205	139	121	101	179	220	202	271	155	211	137	184	197	190
850498.FMP32	163	201	194	117	119	157	133	163	134	139	69	148	90	152	159	183	100	128	104	65	54	46	160	260	181	119	138	108	151	123	162	106	167	111	114	165	94	124	111	157	194	141	141	160	158	120	101	101	119
850499.SEC53	2992	3100	3313	3514	3317	3154	3628	2877	3282	3160	2817	3160	3425	2545	2611	3111	2884	3341	3064	1000	920	1085	3704	3414	3037	2840	2999	2663	2643	3006	3165	2395	3130	2395	3506	4562	3823	2598	2703	2972	2927	2771	2760	3418	4058	3211	3026	3162	2994
850500.OTU1	136	158	259	176	158	151	262	156	207	199	59	250	103	169	180	222	105	315	178	69	58	51	144	220	146	119	216	180	149	214	201	144	269	193	139	117	173	133	117	161	133	138	165	166	162	186	198	175	143
850501.LAM5	131	133	206	136	90	86	142	141	250	222	76	251	119	196	210	245	134	207	158	351	359	388	92	160	112	163	180	190	119	192	169	120	183	124	135	174	174	87	99	116	149	123	172	168	123	223	223	239	191
1466401.None	23	18	28	32	21	20	26	1	9	3	8	0	1	27	37	33	0	0	0	34	38	35	26	30	13	13	26	24	32	16	58	22	50	60	19	21	23	13	8	14	33	14	30	23	13	28	39	32	45
850502.FET5	412	360	518	495	236	252	351	505	480	650	144	679	297	244	222	356	357	1018	515	56	39	74	176	201	171	275	365	331	227	444	322	171	319	211	461	536	610	238	242	315	358	251	351	262	354	316	311	282	272
850503.None	33	23	42	12	12	13	9	54	58	56	17	39	34	26	26	31	20	20	21	19	23	18	9	10	5	21	21	10	22	22	14	8	30	13	16	8	8	6	9	7	7	7	11	14	13	5	15	24	22
850504.ACT1	6087	5733	7965	7352	4796	4387	6459	6738	7735	7942	2568	8581	3859	7446	7539	10039	6064	8163	7148	1296	1206	1350	4268	4960	3998	7468	10126	7797	5890	8390	7763	4033	6918	4843	7240	9821	8476	6360	6250	7665	7174	6065	7142	7905	9318	8475	6685	6988	6625
850505.YPT1	1274	1358	2072	2016	1436	1492	2227	1655	1710	1540	642	1770	960	1347	1211	2080	1166	2487	1362	151	149	179	1711	1970	2133	1409	2143	1858	1488	2427	2115	1014	1903	1418	1327	1805	2055	1268	1230	1881	1658	1402	1844	1490	2227	1850	1246	1372	1218
850506.TUB2	1227	1157	1876	1374	841	855	1388	1878	1750	1777	446	1767	784	964	996	1504	1370	3966	1801	72	93	74	902	1324	1154	1174	1784	1451	1087	1829	1599	671	1451	957	1005	1570	1492	1095	1019	1562	1583	1516	1930	1131	1791	1544	1489	1535	1453
850507.RPO41	443	453	583	395	289	271	385	651	487	500	55	602	191	348	357	494	631	1027	859	76	67	71	161	318	238	380	590	406	204	371	290	184	389	296	328	540	502	395	321	514	605	519	665	385	525	436	462	471	497
850508.MOB2	187	194	276	177	165	226	216	199	175	163	104	146	86	141	112	146	123	205	157	69	70	70	257	399	257	135	205	143	148	232	179	91	177	123	140	172	143	178	156	217	195	178	230	123	188	142	177	174	188
850509.RPL22B	1266	1349	1325	1168	1015	1038	1012	1248	1078	1348	758	772	814	592	591	641	915	722	798	1465	1461	1518	1027	1106	886	856	963	852	337	803	356	1172	1488	1128	1317	960	1372	1002	1127	949	958	900	831	1373	1416	1320	1255	1452	1299
850510.MIL1	190	172	238	191	119	116	167	257	224	251	27	182	69	121	99	161	117	342	199	84	114	133	90	167	119	175	284	187	142	237	160	91	131	99	151	226	266	106	109	165	188	160	211	115	214	121	227	224	198
850511.RIM15	239	221	317	308	154	123	218	282	332	362	53	301	103	175	186	295	168	480	280	253	244	255	97	168	118	180	267	204	159	208	235	120	232	161	159	208	246	100	141	180	215	185	267	196	256	287	261	275	241
850513.HAC1	2962	2940	3389	3401	2259	1997	2507	5399	7865	8318	3570	7468	5514	5073	5108	6267	3189	8157	4098	14712	14343	16213	3092	1988	1851	3732	4240	4039	5622	3974	7017	4780	5794	4478	4315	5441	4949	3206	3056	3304	2686	2301	2238	3577	3639	3269	3840	4026	3817
850514.AGX1	61	84	79	105	53	45	72	1	21	6	1	46	2	78	64	130	9	16	10	8	3	7	75	90	71	53	63	61	146	103	158	107	153	132	40	86	60	40	37	31	73	52	67	51	60	73	13	16	21
850515.CAK1	148	140	249	143	112	93	153	103	76	87	20	95	46	144	138	207	42	100	79	15	23	12	108	169	124	109	188	137	159	184	197	98	181	129	94	140	145	69	95	111	138	96	143	148	148	167	76	78	71
850516.CAF16	215	261	243	300	303	318	338	371	581	490	334	511	385	300	274	348	270	345	354	541	481	587	220	260	242	325	475	393	309	341	436	270	375	300	234	299	296	209	216	305	288	254	258	353	420	346	481	487	459
850517.GYP8	132	132	225	113	69	70	115	96	77	95	35	90	74	113	82	141	51	92	68	73	60	61	78	165	132	129	164	153	176	149	250	82	162	109	102	138	133	78	86	105	150	129	147	95	99	118	80	67	90
850518.STE2	42	31	54	90	26	24	37	91	132	154	45	90	99	26	28	33	26	38	38	126	99	116	19	15	28	29	30	41	73	66	104	37	64	39	27	60	36	44	29	55	35	33	47	30	43	42	32	34	30
850519.BST1	232	223	249	171	134	158	181	219	211	245	146	231	179	190	162	257	118	168	219	74	81	130	167	208	170	200	295	189	202	184	320	104	209	128	144	243	190	131	140	180	230	193	219	186	213	199	207	165	205
850520.EPL1	281	286	369	273	227	193	300	209	170	189	28	160	67	207	201	281	212	282	264	10	11	17	148	263	179	232	293	224	324	319	466	137	266	228	247	372	354	168	202	226	325	268	299	234	364	285	199	223	175
850521.BUD27	403	335	553	352	240	147	362	350	256	236	22	277	84	212	189	305	313	1168	495	98	128	128	119	267	198	376	584	476	232	494	426	99	212	154	310	444	472	327	287	487	452	348	508	289	627	371	260	250	229
850522.FRS2	1322	1271	1754	1342	799	687	1026	1383	1553	1462	378	1744	616	1029	934	1235	1825	2752	2161	196	188	195	927	882	818	1268	1759	1302	1007	1923	1169	647	1151	792	1298	1702	1573	1395	1036	1685	1575	1296	1538	1162	1574	1215	1685	1780	1683
850523.GAT1	85	85	141	69	41	34	46	152	150	144	21	175	52	61	40	56	86	318	128	187	207	177	43	77	60	35	53	46	104	115	141	65	129	74	53	95	93	39	26	37	103	82	94	37	66	47	101	145	107
850524.PAU5	9	3	6	4	3	4	6	0	0	0	0	0	0	8	8	8	0	0	0	0	0	0	3	5	7	7	7	4	10	4	14	10	13	12	0	0	1	4	2	10	4	5	11	9	5	4	0	0	0
850525.None	16	8	20	20	5	5	4	0	0	0	0	0	0	15	24	23	0	0	0	0	0	0	5	11	0	11	8	8	1	1	4	12	60	25	1	0	3	6	13	11	17	17	9	11	10	19	0	0	0
850527.LPD1	1030	925	1458	1214	838	694	1265	1506	1840	1933	525	1979	864	1135	1151	1824	937	2033	1313	382	373	403	734	907	824	972	1441	1064	1104	1750	1610	951	1820	1282	775	1386	1226	861	914	1165	1125	857	1167	1232	1401	1612	1197	1182	1185
850528.SMX2	157	187	157	120	116	184	135	161	221	182	250	211	171	141	102	129	197	95	150	596	622	664	140	141	97	102	103	101	185	104	174	203	193	130	155	106	113	146	108	118	149	149	127	131	106	86	366	431	374
850529.GNA1	229	311	316	275	416	423	415	288	383	368	491	385	422	235	186	240	189	443	197	334	68	85	471	485	433	164	204	135	467	330	574	307	405	295	239	262	225	204	212	228	340	264	281	208	204	205	324	350	315
850530.MDJ1	433	401	789	360	274	251	493	883	955	909	83	1036	262	351	288	557	392	1870	716	114	112	127	180	370	298	279	449	360	662	566	1238	205	482	329	258	517	455	125	262	243	320	291	452	520	699	767	520	537	497
850531.None	1	1	1	0	1	1	2	2	2	1	1	1	0	3	1	3	0	3	0	3	0	2	1	1	0	3	1	1	5	1	3	3	2	0	1	2	1	1	0	2	2	0	0	3	2	1	0	0	0
850532.HSP12	42	37	38	904	50	64	62	277	132	12	19	287	18	5	6	11	27	16	24	111	100	92	86	94	63	5	3	1	16	14	21	7	12	5	20	5	27	9	37	8	185	188	196	32	21	28	75	54	67
850534.IES1	267	225	316	279	183	158	247	439	379	448	106	440	177	226	199	330	255	789	380	12	15	11	133	265	185	220	308	237	184	302	268	116	198	173	184	349	289	190	188	256	341	289	285	224	311	274	365	340	334
850535.None	10	3	6	2	6	1	4	19	32	37	26	9	24	0	1	0	2	2	3	0	0	0	1	7	3	2	1	2	5	3	5	2	1	0	1	0	3	5	2	1	0	3	2	0	2	3	0	2	0
850536.HXT10	4	1	3	16	2	4	1	3	7	13	5	46	2	4	1	4	7	12	16	20	17	15	1	1	4	2	9	0	26	6	37	3	8	4	2	3	3	5	13	4	1	1	4	30	21	35	21	28	33
850537.AUA1	52	81	44	62	29	55	43	41	76	95	105	24	64	113	102	158	20	27	10	129	140	161	114	101	72	69	86	103	164	113	190	111	153	112	77	57	76	47	41	58	47	43	46	51	61	70	36	30	34
850538.WWM1	357	359	387	398	201	218	278	610	535	568	221	355	318	459	477	658	187	445	200	25	17	32	310	308	263	379	533	385	508	758	686	320	513	331	489	598	542	295	318	341	412	424	391	405	473	456	294	325	322
850539.CDC4	309	307	378	313	194	157	308	362	337	333	55	322	132	296	301	386	198	413	290	135	110	137	158	242	170	290	443	314	395	432	505	95	233	192	351	483	381	223	196	298	360	318	442	225	311	249	358	391	425
850540.SMC1	240	270	404	256	163	161	234	274	167	184	91	162	159	166	162	255	139	358	159	53	80	79	100	291	186	230	349	277	222	304	300	113	221	133	225	343	288	179	171	235	341	279	339	179	254	209	160	184	149
850541.BLM10	710	660	958	623	332	250	456	358	523	572	93	528	177	588	621	911	409	796	602	806	895	970	301	446	334	609	843	763	667	715	863	274	476	374	582	691	714	523	427	778	757	593	787	346	490	451	396	461	398
850543.SEC4	979	969	1204	1264	1133	1163	1346	940	1155	1227	877	1108	1039	1071	903	1296	613	999	639	1096	1035	1132	1130	1239	1104	750	1007	875	1174	1091	1468	1076	1678	1225	892	1141	1251	948	813	1124	975	882	992	983	1064	1004	1015	1007	1006
850544.VTC2	637	558	780	689	520	480	702	656	739	788	413	717	479	650	547	837	442	962	627	192	239	225	462	764	603	545	718	597	729	789	871	402	707	496	602	723	717	444	504	582	700	630	814	761	800	831	572	624	591
850545.MSH4	42	46	59	18	14	19	18	110	161	145	98	151	159	30	24	21	79	125	67	48	49	67	27	15	26	9	16	11	57	27	61	32	34	44	22	15	15	16	14	11	19	29	18	38	33	34	81	95	109
850548.None	2	4	6	195	59	40	55	0	0	0	0	0	0	5	3	7	0	0	0	0	0	0	0	2	0	26	32	22	0	0	0	4	9	9	82	79	102	7	21	17	18	23	26	61	42	53	0	0	0
850547.None	0	0	0	0	0	0	0	0	0	0	0	0	0	0	0	0	0	0	0	0	0	0	0	0	0	0	0	0	0	0	0	0	0	0	0	0	0	0	0	0	0	0	0	0	0	0	0	0	0
850549.SPB4	584	505	748	639	459	471	619	561	462	465	185	501	219	504	460	589	548	938	643	404	415	402	316	700	449	519	751	520	486	649	610	395	674	517	552	720	645	681	476	716	637	525	598	549	742	563	515	549	578
850550.DEG1	284	275	402	282	269	274	287	312	216	267	156	199	197	203	240	278	287	435	321	46	56	68	245	383	269	327	399	322	324	366	361	229	369	331	281	388	347	289	193	321	292	264	305	188	309	190	230	246	248
850551.LOC1	950	986	826	679	1107	1136	905	882	701	773	581	563	518	504	416	442	1177	1183	1036	176	180	204	546	797	572	629	569	520	575	481	564	461	558	403	700	639	704	1036	823	937	1032	913	763	645	1050	599	648	641	585
850552.NIC96	570	568	800	635	438	389	695	595	570	559	153	663	283	438	412	671	510	870	676	217	200	217	289	656	466	530	795	672	536	713	783	314	589	433	538	748	777	578	456	747	642	550	704	548	742	575	490	539	527
850553.YPI1	139	150	162	158	148	174	181	135	134	134	51	197	66	188	171	173	63	181	75	7	15	23	209	197	183	129	171	101	164	114	220	125	188	115	126	126	159	58	101	105	137	109	133	198	150	179	168	155	151
850554.RPN11	876	827	1221	943	666	657	1042	1031	891	855	182	1137	328	875	809	1221	612	1495	686	75	66	70	537	936	717	799	1128	849	829	805	1148	396	784	581	858	935	1001	659	737	748	858	727	870	1074	1239	1101	759	848	704
850555.SAD1	323	300	393	297	277	277	380	202	216	188	119	183	160	277	233	316	158	199	166	53	75	55	236	472	265	266	281	226	445	370	616	253	418	284	204	341	254	311	235	307	307	225	243	316	366	305	165	113	130
850556.None	669	697	897	583	501	451	623	591	736	682	368	709	530	267	238	387	379	492	485	227	283	261	565	703	611	501	707	574	940	836	1258	454	791	514	420	762	553	545	482	612	641	508	691	631	836	709	575	598	556
850558.YFH7	154	136	150	111	179	171	233	53	83	85	35	103	36	125	108	123	48	61	51	80	84	89	145	216	163	88	94	84	137	128	149	148	182	136	100	109	97	63	100	89	105	93	110	137	143	172	76	94	86
850559.FAR7	60	69	71	62	67	74	96	75	96	107	38	99	52	69	94	90	44	69	54	31	25	28	70	84	66	47	54	55	135	61	135	54	91	65	46	83	62	22	31	31	51	73	58	81	63	77	66	84	80
850561.GCN20	675	770	981	959	644	562	852	887	1027	1039	370	1052	541	716	718	1007	834	1384	1136	859	914	942	549	719	506	761	906	809	1154	1205	1442	517	948	655	809	1362	1082	890	754	1098	995	835	1110	839	1317	978	763	924	804
850562.UBP6	709	757	841	637	557	490	680	573	546	474	205	690	275	591	549	786	362	559	488	214	218	213	488	789	671	720	978	716	762	608	925	473	678	488	627	763	724	477	519	637	693	572	674	699	716	673	533	515	528
850563.MIC19	435	430	466	289	392	411	393	416	456	541	313	446	351	338	295	374	287	166	239	67	81	74	340	518	364	167	179	164	368	293	371	450	556	457	235	264	233	201	303	228	358	333	390	371	392	340	214	207	216
850565.DCV1	17	25	32	6	4	14	3	0	6	2	4	6	2	4	4	9	6	3	4	0	3	1	4	9	0	0	4	1	3	5	7	3	3	6	2	0	1	0	7	3	0	2	6	5	8	6	3	0	1
850566.None	10	12	16	1	2	3	2	1	0	2	0	2	1	0	1	4	1	3	1	1	1	1	0	3	1	1	2	1	3	3	3	2	6	2	1	2	6	5	3	1	3	0	3	3	1	3	5	2	0
850567.IOC3	319	283	381	265	200	194	306	253	244	299	60	221	88	226	239	292	207	395	270	62	68	54	129	288	179	258	401	280	237	351	324	139	253	213	234	382	300	244	226	315	362	308	344	219	327	219	241	284	242
850568.CMK1	311	264	331	324	327	302	374	155	171	219	66	289	97	247	229	339	86	175	122	22	33	46	286	343	295	264	385	287	389	373	489	384	689	520	250	356	350	287	272	298	319	255	313	316	343	356	309	313	289
850569.GSY1	33	48	89	57	70	38	65	398	326	346	51	440	131	60	48	69	17	66	39	40	81	80	18	31	35	49	98	75	66	60	102	70	136	102	42	43	41	25	54	31	295	284	391	59	35	73	493	497	474
850570.None	306	275	379	269	198	202	285	87	94	133	24	105	54	353	325	435	76	151	94	39	34	48	134	370	212	331	419	291	226	345	286	195	273	219	286	520	299	173	254	264	257	273	303	319	485	373	141	152	140
850572.IGD1	7	2	13	29	19	17	24	55	119	118	1	276	30	45	52	95	12	31	17	9	4	13	10	22	12	19	20	18	29	43	57	18	80	56	13	22	19	11	8	21	30	35	53	9	9	9	199	210	201
850573.None	238	262	556	428	219	173	422	143	239	176	65	369	136	238	178	438	205	923	362	186	232	192	184	256	227	398	808	585	199	421	311	249	497	369	221	302	467	273	243	544	269	180	417	250	448	433	331	352	360
850574.FAB1	263	242	331	181	114	109	133	190	185	245	36	231	80	188	203	295	148	242	184	71	88	114	82	212	131	202	307	238	156	223	223	121	203	117	166	206	210	143	138	174	227	185	290	177	182	185	178	182	176
850576.CSS2	122	116	173	155	169	135	172	0	0	0	0	0	0	178	170	210	5	7	3	7	18	15	235	261	270	92	127	87	158	133	210	239	430	301	125	116	138	82	63	114	141	133	164	82	64	72	17	8	21
850577.ATG18	151	141	212	161	72	71	116	129	203	170	29	210	75	113	129	219	105	315	166	99	99	104	69	95	101	110	195	134	126	219	128	51	119	66	113	147	157	115	92	153	165	130	199	111	123	144	206	192	200
850578.ROG3	99	61	116	75	32	26	44	86	101	116	22	45	34	108	94	144	13	15	28	12	17	22	45	71	52	78	131	90	120	133	175	75	131	83	63	120	122	34	46	68	78	81	92	79	81	77	27	32	35
850579.PES4	14	8	24	22	1	8	5	6	14	20	9	35	25	2	0	1	37	30	26	30	36	30	0	2	0	3	1	3	9	4	7	1	7	4	0	1	0	3	2	2	1	3	2	10	6	7	42	20	25
850580.LSB3	655	662	1025	1110	519	438	939	806	956	1089	210	828	392	667	702	1178	254	930	426	461	456	433	520	686	696	637	1008	794	652	961	1006	418	816	644	855	1074	1249	440	461	666	673	558	880	856	937	1011	545	579	551
850581.HIS2	292	300	332	220	189	176	236	109	199	164	115	225	145	223	233	339	98	170	96	56	82	72	160	146	168	199	250	185	252	302	358	180	265	199	153	257	170	197	172	223	231	194	200	214	220	193	108	138	125
850583.ULI1	14	9	14	22	27	16	16	0	0	0	2	3	6	17	11	15	2	5	2	0	0	0	20	24	15	8	7	7	13	11	43	13	17	7	10	14	9	6	9	10	9	5	7	11	6	12	0	3	2
850584.ECO1	70	65	74	78	45	46	64	116	99	95	46	83	62	50	39	65	39	119	61	12	19	11	38	98	64	54	90	40	45	54	80	48	84	64	57	71	64	32	36	49	52	59	68	30	63	47	55	63	59
850585.CDC14	458	430	752	448	334	330	489	756	559	584	228	459	328	223	227	400	309	731	462	40	46	39	211	337	304	378	530	449	347	527	566	182	308	243	368	600	508	376	286	488	457	442	564	287	534	341	371	428	418
850587.PTR3	102	95	135	108	64	41	74	104	97	106	12	91	24	105	79	166	23	89	49	23	15	17	47	69	53	65	111	96	116	192	192	51	72	63	95	191	134	63	49	98	142	121	138	82	104	77	56	70	62
850588.MET10	229	177	264	168	90	102	133	221	253	269	79	254	129	239	183	333	49	71	75	47	42	52	118	183	141	165	270	177	442	372	659	178	237	198	127	318	197	141	161	180	190	149	200	198	251	228	187	173	189
850589.SMC2	306	267	376	256	136	124	219	181	162	191	66	259	99	235	204	363	164	320	237	230	234	242	111	333	212	287	365	298	150	281	244	138	260	202	217	294	305	182	150	211	301	268	388	233	258	249	209	218	231
850590.RPL2A	9477	10234	12130	10710	9700	9761	11502	9983	11028	11637	9537	9619	10945	8200	8709	10733	7924	9996	7366	1858	1938	2157	11897	9320	9164	10007	12055	9567	5275	13572	5780	10000	14354	10806	9406	12489	11927	8576	8765	10644	11013	9686	10688	9901	13641	10017	8367	8632	8280
850591.RRT5	15	16	13	11	4	9	17	8	2	5	3	3	6	3	5	10	2	17	5	1	2	6	0	2	3	13	14	11	5	13	2	3	2	6	9	10	11	10	4	4	12	8	20	12	5	7	9	9	10
850592.RPL29	10894	12431	7507	9027	16972	23934	10952	6784	12099	9715	31109	9524	15078	9530	6372	6224	8858	792	5079	2642	2637	2643	18470	12147	11082	8969	6606	6854	11111	9529	9257	18491	17240	12438	12839	6308	7653	11988	9415	7437	12969	9223	7149	15574	10295	8700	9702	8897	8544
1466402.None	39	58	47	32	26	25	25	0	0	0	0	1	1	13	13	17	0	1	1	0	0	0	17	16	30	40	62	53	15	30	26	18	21	17	28	29	40	35	31	22	31	26	28	36	40	46	0	0	2
850593.QCR6	1886	1879	2162	1042	1111	1254	1319	1792	2306	2474	978	1975	1211	1633	1548	2047	1421	4096	1366	191	182	197	953	1600	1233	805	1138	855	2210	2063	2693	1371	2251	1686	860	1530	1024	552	1132	654	2140	1791	2042	2200	1923	1983	1172	1141	1122
850594.PHO4	218	210	553	362	140	112	283	713	439	468	36	253	123	162	161	351	145	867	273	14	17	22	93	259	215	219	549	416	222	562	471	116	306	205	238	479	482	218	188	482	352	253	519	201	551	380	250	280	248
850595.None	497	584	526	279	464	571	441	102	152	164	200	172	165	366	349	379	88	54	59	44	56	56	896	864	747	127	132	104	666	615	737	679	1049	658	161	138	148	227	257	239	441	416	384	296	314	253	131	125	110
850597.CDC26	103	112	145	103	84	90	83	131	83	107	32	108	67	67	85	140	177	607	156	26	33	29	60	41	64	94	121	89	60	100	78	102	172	121	130	109	138	96	73	100	76	110	106	108	155	150	119	158	131
850598.RSC8	1103	1060	1704	1177	830	708	1244	1059	914	1007	249	837	393	796	874	1253	725	1935	929	60	69	84	481	964	757	1008	1590	1155	815	1325	1177	506	882	631	1059	1542	1399	967	917	1339	1127	960	1260	1062	1708	1388	676	667	723
850599.IRC5	331	295	475	328	235	223	344	180	146	167	58	161	99	210	214	312	178	336	235	187	208	180	209	450	337	337	520	376	326	342	389	164	355	237	307	405	390	294	235	397	376	313	479	276	351	259	150	131	139
850600.OSW7	356	369	496	422	319	328	464	814	847	903	618	698	958	336	307	475	418	713	506	119	120	114	309	699	531	324	484	443	555	575	786	417	798	489	406	663	465	265	232	346	342	272	388	244	338	287	540	471	422
850601.SAP155	511	445	745	549	340	316	588	847	750	833	272	698	502	405	364	660	435	1081	656	99	118	123	184	533	397	385	728	526	265	547	449	219	508	374	379	494	507	454	366	682	524	426	671	505	734	587	489	519	434
850602.ERJ5	324	340	375	278	375	393	345	239	273	262	237	265	270	269	261	354	149	131	184	16	10	19	386	715	503	221	275	227	331	286	354	350	524	312	270	348	279	258	219	275	239	205	213	280	332	273	175	165	186
850603.KEG1	187	200	239	176	233	260	253	141	168	157	235	192	245	171	194	192	57	71	63	111	90	106	324	217	258	162	140	118	203	146	258	212	277	188	183	194	207	98	130	138	179	158	157	164	181	138	97	123	113
850604.IRC6	115	120	146	132	144	134	147	123	132	169	141	75	157	72	64	77	61	69	72	8	21	11	108	152	87	59	118	61	157	109	178	101	118	96	83	99	93	101	66	121	103	98	93	70	93	70	86	68	68
850605.DUG1	1218	1091	1403	785	621	577	871	994	1371	1383	459	1249	657	1034	956	1277	748	1167	964	598	481	555	563	669	579	750	1037	777	970	1234	1270	695	1136	787	711	1120	794	911	834	918	1171	872	1098	1215	1233	1275	1473	1570	1526
850606.None	178	128	206	91	94	106	144	161	161	170	61	218	85	141	106	146	141	234	153	99	99	103	84	96	74	60	83	63	96	122	141	89	155	115	79	86	82	61	71	82	79	77	84	119	69	111	133	154	143
850607.CNN1	105	108	187	121	87	73	100	158	143	108	64	87	72	86	90	153	36	130	69	29	24	18	90	211	174	93	131	86	119	125	159	90	160	123	68	119	147	81	65	101	108	94	138	84	117	116	74	82	88
850608.BNA6	480	459	676	728	719	698	1038	543	590	619	228	423	369	420	417	659	245	536	345	262	296	353	266	304	271	390	531	450	239	509	335	306	530	426	391	395	524	287	292	461	422	345	434	380	426	396	365	388	339
850609.RMD8	238	192	283	186	142	125	185	177	196	192	40	210	74	156	163	241	153	322	213	46	45	37	98	205	143	172	284	190	202	212	256	97	199	160	164	185	172	132	147	216	264	202	245	183	194	193	188	193	209
850610.YMR31	174	223	213	285	214	267	258	506	614	619	361	543	426	218	192	247	169	221	210	229	245	226	274	280	249	106	139	101	318	251	352	292	401	307	151	180	200	93	148	89	220	184	216	219	169	210	404	373	395
850611.PRE4	1194	1229	1844	1179	788	778	1263	1309	1320	1298	372	1600	641	981	1088	1658	710	1733	1047	112	115	107	663	1128	842	1092	1569	1255	1001	1267	1578	512	1046	715	1053	1275	1483	690	921	1115	1082	921	1207	1240	1541	1595	1128	1073	1094
850612.RET2	945	927	1453	1062	697	633	1046	987	871	854	64	1212	246	843	854	1375	726	2264	1207	69	68	67	533	731	570	819	1340	1123	651	1360	933	402	861	581	821	1181	1216	710	679	1036	1140	898	1298	960	1209	1014	1132	1214	1151
850613.RPN12	809	784	1025	839	606	596	691	616	721	644	409	782	488	756	749	999	400	885	424	62	73	81	640	1014	764	773	896	805	751	677	993	503	763	560	696	829	838	613	714	700	699	701	755	926	1007	934	561	633	603
850614.HXK1	25	20	38	69	108	70	98	1402	1494	1551	14	5011	246	28	15	30	369	586	429	98	61	66	22	40	40	21	27	16	26	27	35	72	128	75	4	9	5	23	148	38	743	559	678	309	42	291	3697	4002	3975
850615.None	8	5	6	1	1	0	4	0	0	0	0	0	0	5	6	2	22	45	39	14	21	16	0	2	1	5	6	9	6	1	7	1	3	3	4	1	5	1	2	6	2	3	5	1	2	6	19	25	30
850616.IRC7	830	817	1393	2039	213	177	1015	389	315	355	158	112	284	318	327	555	2193	6335	3755	185	214	244	964	1336	1259	2000	3360	2654	485	2163	802	641	1392	977	1609	2971	2748	644	531	962	1200	1045	1540	592	1114	781	947	1009	993
850618.None	0	0	0	3	0	3	1	0	0	0	0	0	0	3	2	9	0	0	0	0	0	0	1	6	8	10	13	6	44	15	41	13	25	15	3	2	8	4	0	0	7	4	3	1	0	0	0	0	0
852628.COS12	134	110	143	51	29	21	44	0	0	0	0	0	0	170	136	220	0	0	1	33	27	30	392	382	388	209	279	228	300	239	378	161	220	187	86	84	84	121	123	166	97	62	94	128	117	138	0	0	0
852629.None	15	26	30	10	6	10	6	26	33	26	5	1	3	49	54	54	0	2	0	13	1	5	24	37	28	31	36	36	47	31	46	34	68	35	11	12	19	14	15	16	19	12	20	17	9	14	4	6	5
852630.PAU11	4	5	5	1	0	0	0	4	8	3	23	5	19	0	1	0	5	0	3	14	24	10	0	2	0	1	2	7	3	0	2	1	11	2	0	1	0	0	2	1	0	0	0	2	0	3	9	10	8
852631.None	0	3	1	2	0	0	1	0	0	0	0	0	0	54	68	83	0	0	0	0	0	0	0	0	0	5	1	0	5	1	2	0	0	1	2	1	0	0	0	0	0	0	0	0	0	0	0	0	0
852632.YPS5	5	1	4	5	5	6	12	8	17	5	4	10	2	4	10	10	0	1	0	0	0	0	1	5	6	2	1	0	14	5	26	6	7	7	4	2	5	1	5	3	5	12	8	2	0	5	1	0	0
852633.None	3	5	3	1	1	2	4	0	0	0	0	0	0	4	8	16	0	0	0	0	0	1	9	2	3	0	2	6	19	6	16	8	13	11	4	4	1	1	1	3	3	3	1	0	9	1	0	0	0
852634.VEL1	33	32	39	29	26	19	22	7	16	23	2	14	4	11	3	5	7	5	4	5	8	21	7	23	25	4	15	11	21	21	27	10	16	5	18	12	12	23	7	36	27	24	35	0	2	2	17	12	8
852635.MNT2	525	450	795	736	553	575	729	428	503	625	433	318	705	579	525	773	279	830	566	211	206	256	570	1330	912	529	753	556	848	832	1136	547	1043	796	554	769	737	537	449	750	499	387	537	476	705	534	403	457	462
852636.ADH4	453	405	553	490	429	388	512	303	425	430	182	401	338	338	354	506	214	440	319	199	148	192	288	506	344	387	568	472	407	516	650	454	845	641	276	411	406	546	358	629	424	366	446	439	606	570	289	315	305
852637.ZRT1	340	264	304	1569	394	412	493	241	691	491	181	1622	278	1855	1843	2499	323	709	433	54	56	81	175	431	163	2167	2546	1980	1083	1979	1434	594	1107	699	1738	3109	2023	1411	674	1633	2496	2044	2400	282	398	263	284	300	297
852638.FZF1	136	157	188	114	125	103	120	188	150	243	39	29	93	71	101	131	58	195	95	7	6	14	51	74	41	89	121	98	104	102	113	85	163	125	82	133	143	114	88	134	126	121	135	83	165	128	81	102	98
852639.HXK2	4082	3816	5022	6715	4140	3772	5165	4498	4161	4439	2211	3945	2603	4814	4890	6492	4363	4156	4980	954	869	908	3887	4526	3681	5837	7532	6111	3626	6407	4495	2586	4489	3265	6987	8465	8547	6343	4472	7341	5849	4901	5891	4581	7001	4865	5463	5717	5588
852640.RTG2	642	616	1028	908	495	522	868	425	477	428	126	410	215	835	742	1189	239	602	404	75	79	77	472	1150	896	770	1255	894	684	988	1117	436	940	650	715	1071	1037	559	511	839	833	684	989	601	956	788	365	411	373
852641.HFM1	141	139	184	106	97	102	136	18	45	29	7	104	15	99	113	134	72	134	97	55	67	62	54	136	104	84	100	91	88	150	175	84	123	91	87	111	98	105	61	151	97	64	83	68	78	69	91	84	72
852642.RMR1	80	90	102	87	60	64	89	210	248	245	94	199	158	64	62	106	97	221	123	33	42	52	100	113	96	92	110	78	87	80	106	78	120	74	71	74	89	45	57	83	68	59	75	60	100	75	99	91	113
852643.ZIP2	29	57	39	54	37	44	49	46	92	119	42	32	85	26	36	32	20	22	25	34	42	30	68	58	64	10	25	25	66	45	94	30	58	35	25	42	29	21	16	23	40	20	19	17	29	20	20	14	16
852644.PDE1	80	83	152	238	122	134	199	91	118	132	16	157	58	182	129	271	47	175	90	80	78	92	132	251	232	81	101	88	114	121	174	103	220	182	90	118	144	53	78	100	58	85	100	79	98	124	80	78	91
852645.BRR6	101	143	154	160	123	139	185	114	163	153	165	177	187	91	77	105	79	132	67	340	375	437	127	150	128	86	125	85	171	126	231	107	149	153	89	102	119	103	107	125	106	116	134	81	118	79	136	133	145
852646.RAI1	431	444	570	487	458	372	536	534	470	479	240	480	417	301	273	437	422	892	602	1018	1104	1222	320	438	422	354	490	380	426	494	666	300	516	344	336	489	475	468	360	672	432	378	471	317	546	383	520	467	477
852606.GUS1	1929	1783	2559	1921	1424	1266	1749	2251	2915	3212	1479	1883	1847	2015	1792	2632	1922	2377	2277	4529	4356	5217	1521	1943	1533	1857	2763	2080	1842	2336	2392	1326	2221	1594	1735	1911	2066	2044	1679	2165	2291	1866	2389	1972	2166	2206	2620	2663	2585
852607.RTF1	501	467	595	470	296	306	409	793	592	632	163	716	265	325	268	433	500	927	643	98	117	102	202	442	320	445	556	474	419	466	501	154	304	226	414	707	526	402	340	448	499	410	522	480	693	475	566	549	540
852608.TAD1	168	174	261	155	166	160	200	156	222	229	108	217	156	128	88	171	142	210	131	81	80	89	153	223	193	94	159	148	263	189	366	149	247	201	124	174	170	92	97	148	145	118	192	104	138	107	144	171	178
852609.None	270	259	288	393	248	276	328	293	451	362	385	443	450	393	342	411	236	244	246	138	158	169	350	444	387	331	376	312	291	397	376	288	418	266	341	453	386	209	241	258	192	194	210	279	285	282	287	290	286
852610.KAP114	337	307	425	353	207	234	311	292	268	338	145	263	197	337	298	422	163	272	224	566	574	593	209	324	259	345	381	306	280	312	356	212	331	241	318	504	348	242	227	308	311	261	314	235	313	269	230	236	186
852611.DOC1	26	26	46	18	30	31	24	19	25	24	6	30	8	21	15	33	22	66	38	2	2	5	24	48	24	22	43	28	38	36	49	4	17	22	21	28	39	18	17	29	29	23	30	26	29	36	54	30	30
852612.CSE1	741	817	1038	764	571	505	729	585	571	605	212	588	306	713	682	924	557	885	688	191	192	233	427	836	558	910	1125	837	818	877	996	449	675	497	741	940	905	683	625	794	843	787	891	746	909	770	560	576	515
852614.HAP2	121	112	133	92	79	76	123	176	134	169	22	158	54	115	102	127	70	126	91	19	10	23	61	85	84	77	100	65	81	99	100	71	91	73	69	83	77	62	72	101	123	100	123	93	102	91	121	126	114
852616.MTO1	225	225	416	237	188	150	286	235	276	208	12	449	51	108	120	169	353	1572	764	63	67	83	61	83	113	114	199	151	74	220	121	69	220	135	118	184	198	116	157	163	271	197	358	246	426	324	191	231	209
852615.None	0	1	0	0	2	1	0	0	0	0	0	0	0	0	0	0	0	0	0	0	0	0	0	0	0	0	0	0	1	0	5	0	1	0	0	0	0	0	0	0	0	3	0	0	2	3	0	0	0
852617.ADE5%2C7	5636	5018	9082	7106	3842	3176	6477	4827	3525	3539	795	3057	1355	3049	3144	5086	3708	9344	5751	320	319	352	2937	3321	3326	7254	12404	9560	1341	6113	2046	2228	4418	3272	5417	7007	8234	7177	5296	11184	6557	5314	8262	5139	8939	7024	3164	3425	3241
852618.SEC15	276	259	304	245	207	209	260	241	304	265	114	291	172	224	213	314	160	252	207	449	517	613	227	382	268	186	251	181	286	289	378	167	284	191	197	244	232	185	185	256	234	224	265	217	238	217	282	242	242
852619.TAN1	422	454	543	331	379	472	475	339	404	391	369	402	414	294	262	320	370	290	360	238	225	225	346	570	403	327	352	287	441	370	540	235	425	278	281	288	335	337	328	343	343	334	346	357	425	398	368	347	378
852620.EMC4	492	528	505	541	563	586	541	348	439	386	345	307	365	523	516	643	412	97	316	160	156	187	395	462	412	398	442	353	556	497	645	401	651	436	443	512	478	357	385	401	595	538	572	503	485	395	419	353	384
852621.None	9	17	27	31	23	25	15	3	12	4	6	12	3	14	16	7	31	16	35	25	20	24	19	27	20	9	8	4	71	7	84	35	65	41	13	7	9	5	13	4	11	9	16	14	18	16	53	60	53
852622.SAP4	30	50	50	45	25	28	45	71	108	111	29	171	63	72	72	84	34	91	76	236	243	242	13	44	28	32	47	22	59	38	57	23	42	35	52	84	56	9	27	19	33	23	23	56	38	51	96	112	116
852623.SHE10	522	461	641	498	364	309	435	516	608	607	236	844	394	566	591	773	562	1011	783	142	155	179	270	499	420	469	586	469	484	688	787	265	556	362	585	930	656	391	335	437	535	446	545	370	486	393	630	675	673
852624.VID30	134	140	182	124	86	77	101	241	305	297	63	297	129	249	181	279	80	154	109	129	158	136	86	204	156	108	163	143	225	217	312	107	185	143	82	167	147	70	88	94	133	106	161	129	126	125	177	200	190
852625.OST5	417	457	484	426	460	523	447	296	324	342	488	318	334	442	401	488	361	53	222	99	92	127	571	447	407	454	403	408	362	346	379	342	482	306	480	447	452	428	400	423	436	441	389	451	434	351	383	394	383
852626.MTC3	57	60	82	71	61	81	58	85	114	111	64	142	81	75	88	90	65	64	57	117	89	120	96	85	71	63	58	36	91	73	104	73	136	74	54	48	44	88	63	68	64	60	51	62	55	56	53	72	79
852647.VRG4	2203	2079	2465	2218	1683	1751	2094	1324	1861	1758	1963	1773	2369	2193	2050	2636	1042	1487	1154	424	476	549	2150	2114	1860	1991	2344	1954	2317	2457	2985	1779	2856	1997	2080	3079	2342	1940	1446	2056	1890	1573	1719	1655	2208	1685	1209	1224	1329
852648.SDT1	220	262	238	207	167	175	210	108	193	155	103	223	113	169	165	210	142	218	141	245	106	115	237	217	179	227	231	187	288	266	366	154	177	146	214	252	176	143	174	125	232	207	192	224	221	181	105	143	167
852649.COG1	234	214	222	225	196	190	221	217	235	243	87	258	127	171	169	268	152	220	238	998	1091	1190	158	245	222	178	228	178	310	211	317	284	346	265	204	298	213	199	177	242	228	229	238	176	194	173	401	461	411
852650.EDC1	39	33	41	29	28	34	36	111	107	101	56	95	60	36	35	31	91	107	86	63	75	87	23	51	11	25	28	21	78	26	78	19	39	24	37	23	29	25	26	28	61	55	59	26	42	37	136	138	138
852651.NIF3	557	530	633	636	585	562	667	241	518	427	255	557	320	483	491	648	257	596	364	640	651	684	515	556	526	464	481	419	452	660	581	494	689	488	464	558	575	425	441	474	622	495	586	552	586	548	584	596	560
852652.BOL2	504	657	578	608	599	633	628	339	590	387	460	643	441	457	386	467	589	1789	625	519	595	639	655	486	508	378	439	305	486	521	513	412	535	462	511	400	512	488	438	550	544	446	420	510	502	441	1255	1308	1241
852654.MDM34	166	157	215	201	145	148	215	265	259	245	50	376	108	222	176	275	244	272	293	61	54	58	84	153	124	162	178	147	219	308	288	116	225	160	159	254	195	172	155	171	271	236	249	213	247	210	292	254	315
852655.KIP3	146	122	184	129	89	81	153	153	102	118	18	127	45	109	110	180	121	256	167	40	29	40	79	130	105	92	161	106	168	188	289	62	121	119	107	101	105	130	91	166	145	152	175	98	125	107	173	158	160
852657.CLG1	1093	1029	1320	878	799	718	974	1122	779	949	138	841	267	848	775	1100	1220	1497	1300	24	18	22	399	889	595	1113	1318	1001	671	1222	933	527	780	589	892	1402	970	1245	973	1406	1210	1071	1310	942	1346	943	1004	963	958
852659.SKI8	335	371	498	337	317	323	410	315	391	408	175	308	248	197	213	283	208	315	265	287	316	317	202	318	243	246	394	257	265	378	362	146	294	217	270	393	292	315	284	338	377	325	409	347	447	374	254	274	245
852660.VAM7	55	55	68	55	40	26	56	37	31	57	1	37	14	36	33	41	25	74	33	0	1	0	17	29	28	44	65	41	40	75	55	20	47	44	55	74	61	43	41	51	58	65	80	58	70	59	27	43	28
852661.NCS6	391	397	515	395	379	327	517	549	472	502	287	315	355	265	288	401	344	843	422	349	342	383	303	363	317	236	411	262	380	529	569	252	439	372	321	460	416	414	366	528	415	372	392	376	602	409	269	364	337
852662.YPT32	225	228	314	224	159	192	221	372	438	478	272	395	332	212	170	225	263	502	338	75	68	115	173	206	170	185	193	209	216	285	283	125	187	125	199	252	218	161	127	223	270	219	255	180	224	164	260	284	292
852663.MIG2	99	95	166	69	37	37	78	49	67	76	8	138	23	55	53	86	53	140	88	9	10	13	53	92	80	43	59	40	107	295	164	46	69	49	59	94	84	66	39	87	144	140	143	39	122	52	164	177	169
852664.SIP2	31	48	61	65	78	61	80	53	57	55	1	86	10	32	32	56	34	102	35	2	2	4	24	36	26	32	47	20	46	84	87	25	44	31	22	35	28	19	39	27	38	20	47	40	64	61	33	41	35
852665.SPT16	941	918	1317	988	588	595	855	1211	1103	1164	260	855	473	994	1002	1377	797	1358	1119	372	344	403	622	1181	821	1006	1508	1105	1053	1142	1461	487	855	547	958	1514	1108	742	680	967	996	826	1118	934	1142	986	880	912	893
852666.CHC1	893	872	1145	807	414	351	572	1437	1434	1767	444	1189	812	969	980	1371	779	1168	1068	927	945	1012	602	1159	834	978	1223	1038	976	1149	1396	562	967	709	747	791	916	459	510	607	1033	783	1006	710	735	776	1202	1200	1174
852667.POX1	33	26	37	28	14	20	25	22	37	30	6	33	14	35	31	54	9	12	12	6	2	8	22	6	17	30	29	29	21	26	23	49	72	38	21	27	19	28	16	27	20	14	18	30	31	14	17	12	28
852669.None	37	45	59	26	38	34	32	0	0	0	0	0	0	37	27	29	0	0	0	0	0	0	66	48	21	12	21	12	67	54	80	12	34	38	13	10	27	17	26	23	15	22	15	34	26	54	0	0	0
852670.KEX1	298	300	401	293	188	194	262	534	406	557	161	175	272	259	238	343	392	861	583	44	47	61	140	263	215	294	384	329	241	390	375	91	228	161	252	381	327	223	216	258	303	289	325	246	393	289	439	485	390
852672.ARO8	1178	1034	1681	1481	919	828	1370	1020	1209	1378	377	764	556	1423	1375	2237	842	1859	1118	332	337	379	866	1071	1030	1651	2777	2008	1314	2039	1904	905	1817	1276	1336	1821	1990	1528	2205	2076	1450	1275	1681	3546	4789	4466	1415	1489	1507
852673.MCM6	379	333	666	419	238	210	384	452	348	390	47	227	134	245	234	393	343	883	527	102	71	90	164	353	243	368	616	461	304	562	528	144	338	235	250	504	458	308	414	461	419	348	496	659	837	757	287	335	312
852675.EMP24	1588	1529	1933	1937	1949	1967	2225	1708	2449	2402	3101	2608	3526	1689	1633	2194	919	1949	1130	696	689	793	2504	2332	2312	1181	1515	1157	2089	2439	2769	2005	2869	2218	1666	2150	2021	1470	1424	1823	1409	1247	1332	1555	1976	1675	1427	1401	1386
852676.YIP4	313	332	488	605	523	527	857	866	1129	1151	748	834	1094	368	383	568	292	852	383	277	316	333	709	643	749	322	470	326	676	1047	1046	597	1134	825	329	497	508	358	401	529	364	305	429	411	517	492	639	676	647
852678.MDS3	369	340	508	455	174	140	239	411	707	878	46	328	182	522	548	819	172	410	365	43	36	46	88	256	149	320	579	439	264	364	372	163	298	211	436	671	566	301	202	359	291	264	370	267	392	305	249	259	256
852679.DSD1	162	178	237	201	124	122	178	507	714	967	143	245	306	223	183	285	126	357	254	173	172	207	138	184	139	117	180	137	205	183	198	123	237	164	107	156	166	104	146	136	185	122	160	243	235	265	179	235	195
852680.GCN1	862	817	1195	969	595	493	911	1263	1695	1907	311	1366	686	870	849	1305	974	1922	1423	1881	1864	2172	526	698	534	980	1362	1025	856	1300	1238	471	769	640	844	973	1071	784	782	1082	925	754	1069	965	1162	1079	1181	1205	1132
3799973.None	75	123	73	133	265	267	223	64	97	103	136	122	145	57	68	58	57	17	55	105	89	105	127	143	85	65	35	49	165	60	141	121	123	81	64	72	45	54	63	51	79	79	53	60	71	56	70	96	94
852681.HOS2	74	85	98	87	71	85	91	89	99	83	88	123	99	61	77	59	84	93	90	89	91	112	73	82	66	41	57	52	103	55	146	44	79	39	62	59	70	34	42	59	71	52	81	43	46	38	119	129	106
852682.None	3	1	6	5	27	25	15	4	4	1	2	5	3	9	2	5	4	2	3	10	6	15	39	31	26	5	2	1	3	5	10	0	7	3	8	1	2	1	2	6	11	4	5	9	8	16	6	13	2
852683.IME4	99	92	147	110	120	98	167	86	103	92	28	128	42	124	103	156	119	228	127	51	51	77	96	155	139	84	121	96	101	149	175	55	92	78	82	144	107	57	79	88	109	75	116	104	129	98	131	144	149
852684.COX13	1168	1332	1227	990	1175	1445	1161	960	1266	1266	737	1319	720	1021	1025	1124	727	651	689	83	82	97	1628	1797	1410	365	359	330	2019	814	2120	2052	2533	1738	568	908	669	500	726	385	1291	1220	1132	1106	913	886	577	620	608
852685.CDC55	485	459	699	450	266	280	391	472	492	445	139	438	252	419	352	518	326	656	436	163	159	180	205	488	339	432	654	531	342	392	461	206	423	314	479	456	554	420	353	559	592	467	682	431	499	441	365	372	334
852686.RPS26A	17916	18226	13704	14732	25609	28899	18588	15020	18416	18140	32132	17732	28149	13808	14244	12585	12038	7560	9052	6559	6990	7916	22125	21651	16216	16070	12634	11194	11778	18290	9832	24458	25993	18026	17118	13554	13898	17979	17178	13916	18436	17338	11910	18824	17320	12831	14009	14773	14143
1466453.None	71	78	99	62	56	79	80	0	0	0	0	0	0	23	16	29	0	0	0	0	0	0	34	100	61	68	104	53	22	43	27	34	77	60	56	40	68	51	36	63	47	40	51	70	84	39	0	0	1
852688.COX4	1523	1696	1977	1118	1264	1388	1590	1648	2074	2162	909	1873	1352	1000	1008	1391	816	848	853	211	224	227	1651	1882	1638	397	469	369	2459	1422	3028	2483	3813	2739	634	1193	778	373	1065	364	1402	1379	1466	1786	1513	1821	826	806	768
852689.TPN1	523	577	703	607	477	408	571	453	520	510	449	460	536	343	320	462	250	303	338	508	544	596	380	414	359	508	709	554	286	491	412	361	540	346	619	600	697	401	382	526	618	466	580	528	583	516	399	408	416
852690.None	110	106	105	167	74	100	107	130	210	159	90	228	113	158	181	210	148	287	186	164	151	142	104	195	172	107	139	109	249	198	326	142	217	188	123	211	146	79	110	102	96	100	112	206	218	185	313	345	299
852691.STR3	19	17	14	15	10	17	6	103	170	164	82	124	104	19	23	28	48	75	52	22	45	23	9	28	13	11	20	6	47	19	81	14	34	36	10	17	13	11	9	11	22	9	14	32	40	19	65	90	103
852692.MND1	21	7	20	20	5	6	5	18	12	17	5	3	6	18	24	31	4	4	0	0	0	0	25	34	35	16	27	20	47	17	64	20	31	26	19	33	20	10	3	15	4	13	5	3	0	5	4	3	3
852694.GTS1	298	273	398	389	204	189	275	339	417	376	77	433	156	305	330	485	146	458	257	36	26	38	227	360	267	300	443	321	385	513	540	149	360	228	318	590	451	208	277	262	308	246	318	314	375	417	273	308	240
852695.ATG1	76	71	124	95	38	31	59	92	144	134	17	155	33	108	114	161	63	65	63	16	24	31	27	57	48	138	240	155	140	79	149	29	66	45	85	99	86	28	58	47	69	64	70	92	104	92	170	140	169
852696.TOS3	60	64	75	60	48	43	72	44	72	67	22	83	34	48	69	70	16	29	24	37	24	24	44	82	50	37	52	63	82	52	91	115	196	191	36	33	45	47	92	42	55	33	42	99	118	92	115	72	102
852697.MPT5	517	461	655	445	197	225	284	516	471	579	66	599	160	438	397	574	541	601	623	50	60	44	127	327	241	434	642	452	282	497	353	204	346	272	411	707	555	395	308	485	515	488	554	379	471	416	519	583	582
852699.None	184	183	220	150	126	88	162	155	185	227	85	140	114	154	148	210	113	191	149	115	85	116	55	149	104	116	174	115	126	129	197	84	181	128	144	166	157	117	129	153	152	130	158	132	163	137	145	156	124
852700.SAE2	39	33	36	20	22	9	46	45	56	70	17	53	48	32	19	33	28	67	47	1	0	2	8	34	23	15	41	28	23	35	34	12	37	23	33	40	23	15	16	34	45	42	38	19	59	45	38	45	52
852701.BUD13	141	123	201	108	111	88	113	172	140	169	97	107	153	105	126	131	83	116	73	118	74	106	110	257	185	129	185	123	163	128	186	109	176	102	89	162	113	102	117	137	160	146	152	149	193	153	122	89	101
852702.XRN1	1045	868	1318	971	569	482	778	1208	1331	1654	370	1214	601	964	937	1402	764	896	893	1107	1132	1216	421	790	560	1066	1492	1132	781	1110	1028	414	861	532	901	1006	1155	729	729	970	985	812	1044	1006	947	990	824	936	879
852703.NUP49	483	495	664	558	377	412	589	812	684	792	210	626	337	366	321	511	427	1331	664	149	179	178	285	554	402	445	612	436	478	530	652	221	446	335	400	579	543	399	376	509	553	456	627	396	543	478	486	510	520
852704.ROK1	691	704	916	681	518	507	666	547	377	385	136	389	199	468	402	568	680	1438	886	105	91	100	280	567	403	587	714	614	427	707	583	340	493	346	699	951	802	848	553	947	790	675	773	560	1002	573	416	409	402
852705.SPO74	49	62	83	46	28	32	34	28	21	45	24	27	38	26	26	16	45	73	44	156	185	187	12	33	23	56	28	41	76	22	115	17	14	13	40	47	30	38	35	44	56	51	35	35	55	39	46	26	35
852707.SUA5	423	486	635	410	353	323	425	356	284	253	44	232	86	324	284	469	273	657	431	160	160	171	193	271	239	331	429	352	184	362	286	181	246	190	384	429	514	450	331	540	528	400	509	323	620	332	227	267	265
852708.HUR1	168	145	109	102	82	126	67	85	262	288	336	129	286	167	140	133	71	20	56	661	740	753	258	213	135	217	156	197	384	146	288	200	145	110	165	59	115	152	101	146	109	109	66	125	72	74	219	229	223
852709.PMR1	812	667	1172	1177	613	513	906	1803	2409	2577	1032	2377	1797	925	967	1386	1079	2321	1440	259	276	288	691	1266	908	988	1388	1083	1041	1306	1605	548	1221	801	1060	1673	1498	820	635	1069	904	706	968	724	1088	932	1216	1270	1177
852710.CUP2	296	336	478	611	324	336	505	411	621	521	358	334	454	504	454	734	278	925	299	228	207	235	796	831	911	271	512	387	1503	1011	2357	653	1247	957	417	771	679	271	279	433	256	263	336	344	339	428	270	310	310
852712.YRB30	212	188	309	182	138	166	192	172	214	199	67	237	123	190	207	277	178	379	225	324	338	364	97	208	139	144	247	194	166	280	238	90	177	134	188	286	230	150	141	175	194	151	210	157	218	191	208	219	230
852713.RAD54	201	209	314	170	127	131	145	134	177	196	85	259	99	149	138	216	154	430	260	160	146	166	94	228	135	175	254	212	210	202	316	91	206	146	132	223	179	171	137	217	218	145	231	146	189	208	265	275	214
852714.SUT1	124	142	190	131	158	165	249	162	133	132	19	29	28	52	36	73	62	84	59	9	1	4	29	43	25	82	111	110	39	74	51	51	83	76	77	111	79	112	148	139	79	87	124	209	361	193	35	39	24
852715.YIP5	467	420	710	719	400	408	643	479	722	713	672	779	947	609	586	1010	228	484	304	226	240	278	560	681	674	483	722	595	808	963	1320	574	1219	840	611	1023	887	381	373	569	462	387	567	453	530	533	506	461	462
852716.AIM14	303	278	352	298	238	210	253	184	271	266	146	260	204	358	322	460	113	180	159	201	178	206	205	428	318	251	347	245	427	358	518	277	362	247	265	451	300	153	183	179	270	230	237	281	288	273	194	188	193
852717.None	201	215	255	208	246	276	259	110	210	196	122	119	159	203	201	229	87	123	124	692	631	707	254	368	281	172	172	122	252	203	343	199	243	179	168	189	181	162	141	176	228	209	211	225	203	194	196	236	221
852719.RCK1	28	19	32	23	6	10	12	20	5	8	1	16	2	6	18	12	13	34	26	1	2	4	8	14	6	2	20	7	10	35	26	17	25	17	7	17	13	21	16	27	29	29	20	11	21	14	37	31	47
852720.ARI1	426	341	493	676	442	427	552	767	899	1016	421	744	478	1093	1062	1367	581	735	757	174	186	226	666	806	737	371	491	406	1010	1041	1316	900	1300	923	512	958	642	482	455	648	387	352	418	609	670	596	801	847	794
852721.AMS1	85	96	179	124	70	84	126	155	145	150	17	244	54	254	248	333	90	206	149	178	184	217	118	242	142	104	170	115	112	203	197	160	277	222	67	157	130	147	102	138	99	102	158	97	119	115	176	197	189
852722.CDC43	302	254	342	313	290	253	330	146	120	147	54	120	145	283	244	333	66	152	94	145	117	183	192	433	306	198	315	258	378	354	563	200	404	299	243	386	292	192	186	253	241	247	295	252	380	284	90	72	106
852723.LYS5	122	128	123	134	106	145	139	148	216	203	107	270	149	121	95	155	109	521	174	1182	1278	1435	166	138	137	105	127	105	244	161	306	159	219	176	92	107	93	89	78	105	103	117	108	94	126	95	233	256	245
852724.PEX14	131	147	236	174	127	141	202	162	123	147	62	145	67	114	97	133	86	194	113	23	35	29	115	217	133	126	194	125	142	159	200	87	192	128	136	163	149	102	106	127	146	122	137	158	258	143	104	132	103
852726.NUT1	301	305	406	275	181	194	267	396	420	432	74	314	150	239	242	310	214	363	290	141	125	130	144	367	229	321	508	414	278	325	363	122	229	188	250	428	373	232	184	290	377	337	347	214	268	239	262	253	243
852728.INO80	585	519	781	597	301	264	506	649	616	657	202	578	299	512	490	806	297	558	515	261	286	343	204	444	322	468	756	631	343	640	439	229	500	348	478	733	731	376	337	536	661	538	691	435	519	536	496	529	476
852727.None	11	5	4	3	3	6	5	20	15	7	0	7	1	4	1	7	10	26	13	0	0	0	0	2	0	8	5	7	6	7	4	1	3	4	6	11	9	6	8	8	6	3	10	8	9	8	2	13	8
852729.ARO2	1616	1497	1850	1566	1352	1272	1515	1382	1754	1714	743	1851	1097	1376	1358	1699	1428	4554	1973	1612	1563	1827	1119	992	976	1624	1966	1588	1138	1811	1366	1022	1612	1250	1515	1846	1672	1390	1469	1583	1817	1439	1646	1798	2358	1826	2207	2329	2203
852730.RPL9A	11437	12539	11526	11648	16015	17404	15005	10488	12182	12588	14957	9513	14334	8307	8331	9117	8104	5102	7612	11376	12397	12817	15663	14137	11168	11256	9694	8925	6325	9927	6461	15661	18880	13956	10996	10675	11517	11995	12231	11849	11058	10798	9194	13751	14153	11283	9963	10134	9898
852731.RRT6	20	21	42	43	20	20	34	31	57	46	40	79	44	16	12	34	27	56	39	55	44	57	17	33	16	17	19	6	16	34	32	34	95	56	23	19	38	18	10	26	36	21	33	28	21	22	42	47	41
852732.TIP20	277	264	337	280	206	229	283	189	182	161	90	140	116	237	218	296	103	139	138	45	34	26	139	333	231	247	332	238	266	305	310	211	346	259	257	350	303	248	183	326	312	303	332	214	298	186	146	142	136
852733.ROG1	145	124	164	125	89	69	137	115	143	170	36	119	66	128	141	177	77	180	125	47	54	48	93	178	110	174	258	228	161	166	192	96	143	112	122	154	149	83	114	123	115	127	140	147	147	194	120	103	142
852734.MRF1	178	177	283	231	214	187	296	129	170	183	53	297	88	195	193	311	193	374	250	239	219	227	158	237	185	166	201	163	127	189	196	156	312	236	110	141	164	115	156	155	187	149	211	215	223	234	156	203	160
852735.GPI10	227	230	261	234	120	137	161	158	237	228	105	201	169	198	240	215	77	208	131	81	104	83	114	175	131	185	171	157	236	190	287	183	253	172	190	246	209	161	138	177	202	170	195	202	195	182	119	140	145
852736.HUL5	157	171	207	169	94	114	143	235	247	270	59	220	98	208	237	301	87	153	115	57	63	75	143	177	173	165	199	180	233	186	328	104	180	142	185	259	212	97	133	126	140	147	188	209	172	213	171	182	197
852737.None	443	409	638	412	292	205	387	551	621	684	216	614	411	434	392	622	372	1122	575	174	148	209	262	585	405	421	558	419	546	649	791	302	591	454	413	544	493	336	295	554	424	342	500	359	487	404	417	451	437
852738.FLC3	345	291	445	345	258	238	351	379	192	244	69	302	135	275	278	386	276	412	336	34	25	38	144	247	196	307	389	306	229	350	357	161	318	222	288	453	396	307	243	314	349	299	372	220	467	288	279	309	314
852739.None	2	2	3	4	0	1	1	0	0	0	3	4	0	0	1	2	0	0	2	1	3	1	0	1	2	4	0	0	9	2	5	0	0	0	0	0	1	0	1	0	1	1	2	0	5	1	2	3	0
852740.SEC27	1185	1060	1771	1329	756	642	1138	1355	1527	1615	366	1527	644	1200	1123	1840	785	1847	1121	162	175	188	744	1122	1019	1230	1747	1317	1115	1704	1455	647	1256	931	1163	1764	1670	998	947	1443	1314	1068	1528	1025	1562	1310	875	998	862
852741.MRM2	191	217	251	235	246	199	250	343	374	422	323	387	392	229	210	263	208	587	250	826	849	1016	240	306	305	188	238	210	227	284	313	220	324	232	167	231	254	114	118	151	189	159	196	162	165	187	213	243	234
852742.RPL1B	10223	10387	10670	8895	13244	12909	13127	17760	21729	22369	24879	18620	29410	7188	7860	9162	13408	5808	13052	10624	11307	12465	12651	10971	9525	5297	5465	4903	5450	11392	6434	12580	16275	12185	10191	10835	11122	10343	11615	12110	10972	10403	9980	9642	11230	8642	16373	17421	16936
852743.PCL10	186	165	258	179	191	187	281	176	291	258	119	203	144	153	174	219	165	250	212	960	881	911	137	280	212	91	122	114	237	178	293	159	278	215	142	187	156	138	127	143	174	160	191	194	237	206	246	275	255
852744.ITC1	342	288	474	320	131	144	278	281	192	217	35	192	74	341	298	440	216	309	240	121	108	154	101	273	219	277	491	307	180	349	258	145	263	196	259	376	362	250	222	343	409	316	406	291	430	374	206	206	212
852746.SNT2	141	111	214	137	85	86	139	216	197	229	38	150	66	132	146	220	84	196	177	66	99	74	50	134	66	97	151	105	81	186	104	61	149	115	111	163	138	98	89	118	147	101	178	135	136	152	125	127	107
852747.CEG1	388	346	539	432	236	260	393	539	422	462	110	385	200	251	230	453	291	614	394	262	245	244	198	403	344	300	494	388	307	409	463	186	422	314	289	427	368	248	231	373	379	269	432	305	492	366	357	397	409
852748.RSM23	410	365	541	334	438	506	530	586	549	594	94	823	188	266	233	348	717	1410	1029	93	81	93	208	397	268	205	318	237	222	327	314	241	391	258	208	351	307	246	317	329	387	348	383	444	589	488	445	493	469
852749.CWC23	91	82	91	77	66	59	71	116	164	131	41	124	72	105	85	116	98	321	177	650	761	756	60	98	86	76	88	87	77	73	98	72	112	51	74	87	76	48	48	82	80	69	97	66	77	78	176	193	201
852750.SOH1	209	235	245	224	120	156	168	194	220	198	102	147	117	184	198	245	111	145	129	36	19	25	206	207	197	159	193	196	202	249	256	111	221	170	162	303	206	169	126	161	235	151	164	138	177	151	146	183	157
852751.SCS3	559	585	1173	1098	578	424	948	538	652	652	250	975	401	975	991	1978	266	994	432	65	79	68	1134	1123	1297	614	1361	1040	747	1425	1583	827	2078	1529	591	1197	1373	464	502	914	479	370	736	559	744	810	865	866	774
852752.MET13	135	130	165	167	116	117	121	77	171	148	63	165	92	212	238	333	48	126	68	41	38	56	246	250	249	59	82	63	377	287	575	228	381	236	127	218	137	25	79	59	138	105	127	100	116	113	97	97	105
852753.MON1	159	163	214	137	128	109	162	112	132	142	57	120	74	159	133	197	59	93	70	216	209	244	113	235	171	118	158	121	191	142	263	116	187	115	97	177	155	99	88	141	145	121	137	129	127	150	140	161	165
852754.RPS2	18837	18888	23582	22418	19557	18136	24378	21091	24694	25972	16011	20754	20789	15531	16184	21103	17897	38074	20978	5592	5586	6143	18206	16625	16107	21769	27344	22182	11030	24784	13776	16777	25395	18764	18533	24244	23709	19239	17443	23478	20487	18236	20861	19341	25159	19790	16442	17165	16283
852755.NAB2	608	526	960	611	438	391	671	741	563	514	131	556	208	358	362	573	467	1692	813	45	40	47	227	383	324	492	901	657	548	677	830	219	411	328	388	519	656	455	424	594	731	558	915	602	946	766	583	592	573
852756.GPG1	13	14	21	323	24	28	23	83	119	116	40	102	53	22	29	25	37	45	27	61	54	65	26	32	23	11	6	9	18	15	29	29	42	44	15	4	12	14	9	15	32	25	27	11	6	12	118	112	87
852757.PRP43	1210	1106	1666	1233	748	702	1080	1231	941	1025	201	865	325	678	766	1016	1010	2609	1634	71	85	89	385	638	549	892	1301	978	843	1447	1109	465	839	628	1037	1641	1389	1239	954	1704	1385	1068	1570	1006	2087	1286	854	857	874
852758.COQ8	170	148	259	163	119	145	193	353	363	383	111	334	197	134	129	227	270	432	359	319	238	245	105	209	169	109	160	127	219	323	329	148	265	193	164	224	195	135	124	169	176	165	212	176	243	149	282	307	296
852760.None	0	0	2	2	2	0	0	0	0	0	0	1	0	0	1	0	0	0	0	0	0	2	0	0	0	1	0	0	2	0	1	3	0	0	0	0	0	0	0	2	1	0	0	0	0	2	0	0	1
[truncated: 4,009 more rows]
[truncated: 184 more columns]

## Sheet: Normalized-RNA-Seq(CPM)
	273614N_S1	273614N_S2	273614N_S3	378604X_S1	378604X_S2	378604X_S3	A12_S1	A12_S2	A12_S3	A4_S1	A4_S2	A4_S3	BC187_S1	BC187_S2	BC187_S3	CBS432_S1	CBS432_S2	CBS432_S3	CBS5829_S1	CBS5829_S2	CBS5829_S3	CBS7960_S1	CBS7960_S2	CBS7960_S3	CLIB215_S1	CLIB215_S2	CLIB215_S3	CLIB324_S1	CLIB324_S2	CLIB324_S3	DBVPG1106_S1	DBVPG1106_S2	DBVPG1106_S3	DBVPG1373_S1	DBVPG1373_S2	DBVPG1373_S3	DBVPG1788_S1	DBVPG1788_S2	DBVPG1788_S3	DBVPG1853_S1	DBVPG1853_S2	DBVPG1853_S3	DBVPG4650_S1	DBVPG4650_S2	DBVPG4650_S3	DBVPG6040_S1	DBVPG6040_S2	DBVPG6040_S3	DBVPG6044_S1
[truncated: 5,376 more rows]
[truncated: 174 more columns]

[truncated: 5 more sheets: PGLS-Transcriptome_List, Normalized-Metabolite_values, PGLS-Metabolite_List, KO-RLS-Associated-Genes, GSE_significant_output_table]
