# Supplementary figures and images for: Evolution of natural lifespan variation and molecular strategies of extended lifespan in yeast
Source: eLife journal article supplement (doi:10.7554/elife.64860), 2021-11-09

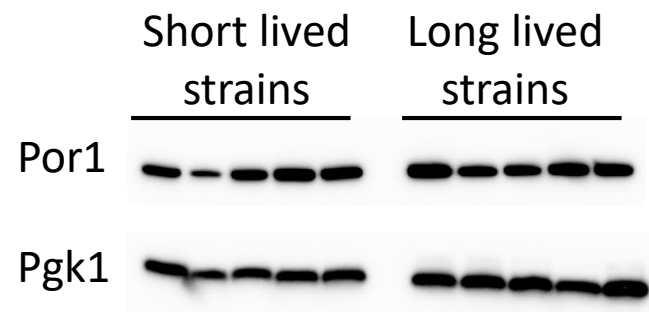

30kDA

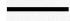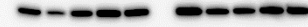

Por1

45kDA

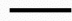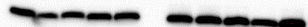

Pgk1

Supplement: fig6-figsupp4-data1 [file elife-64860-fig6-figsupp4-data1-v2.zip]

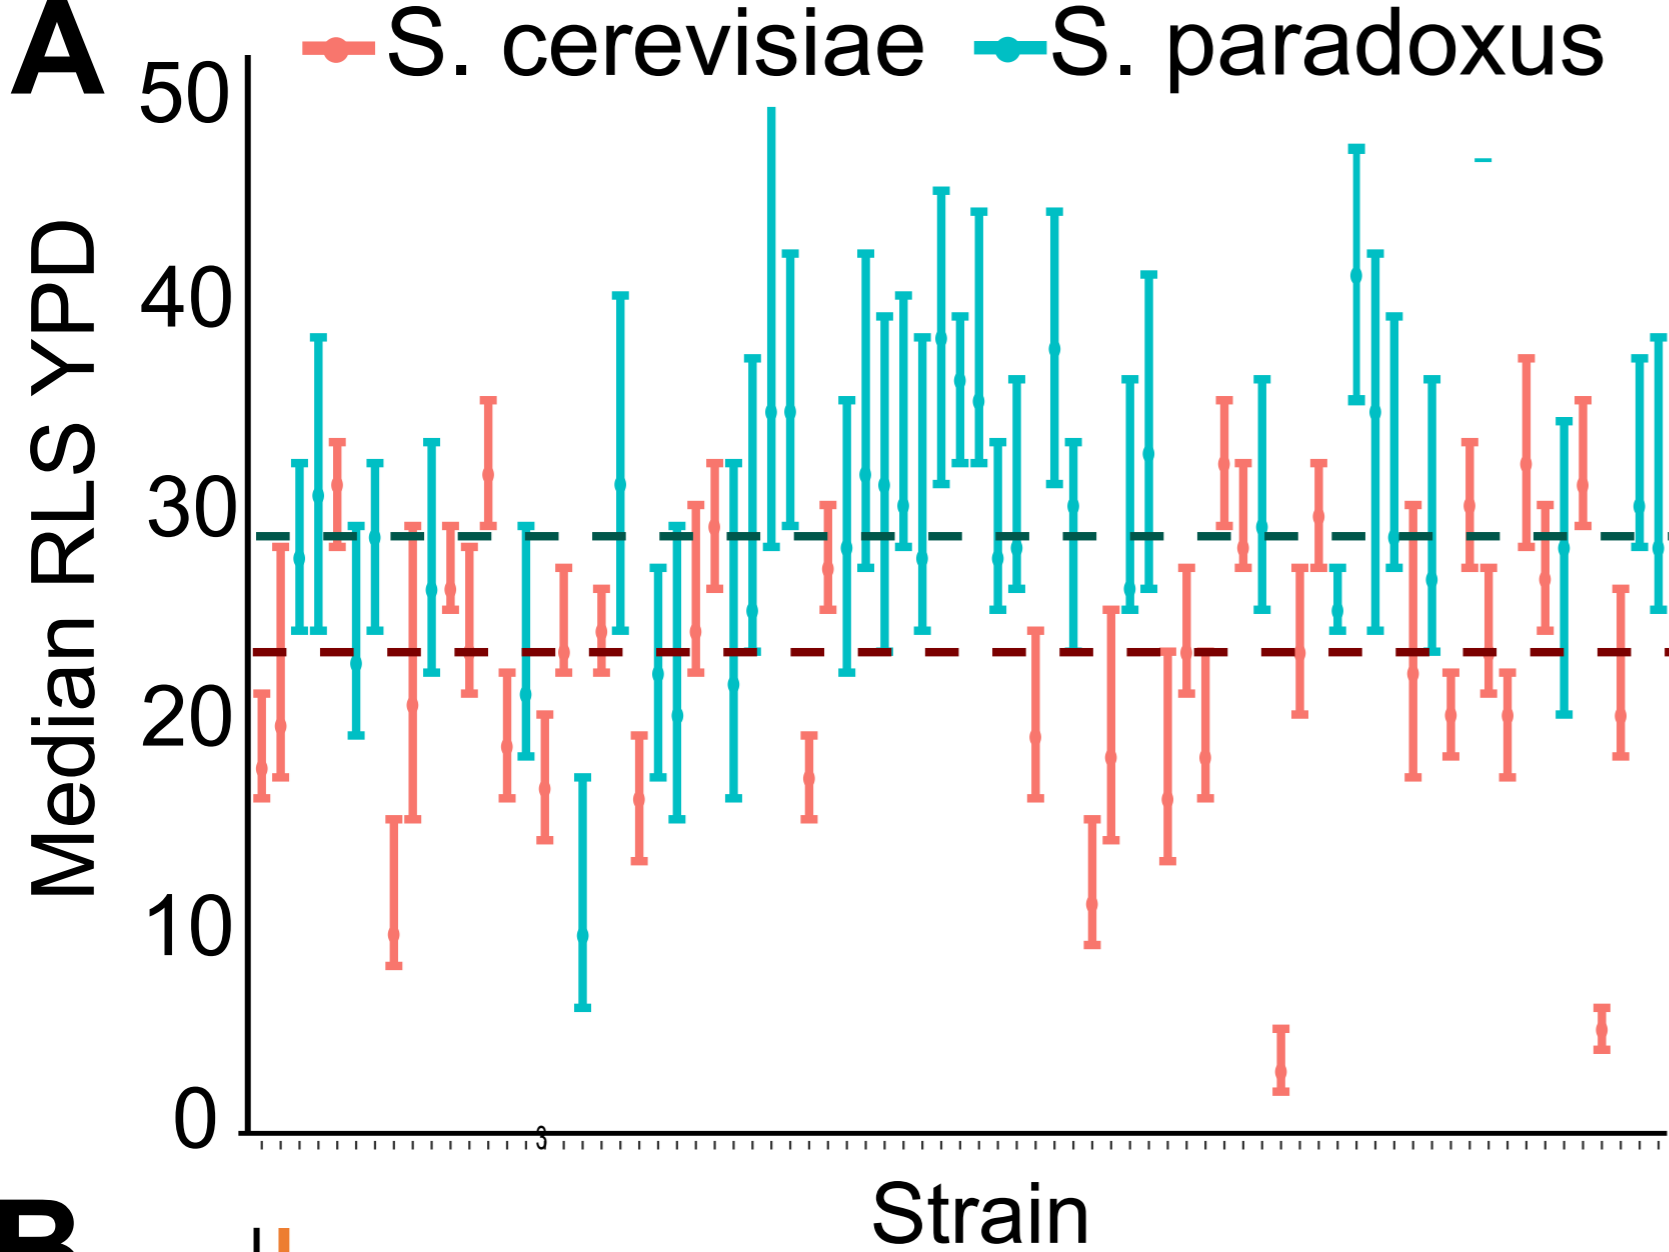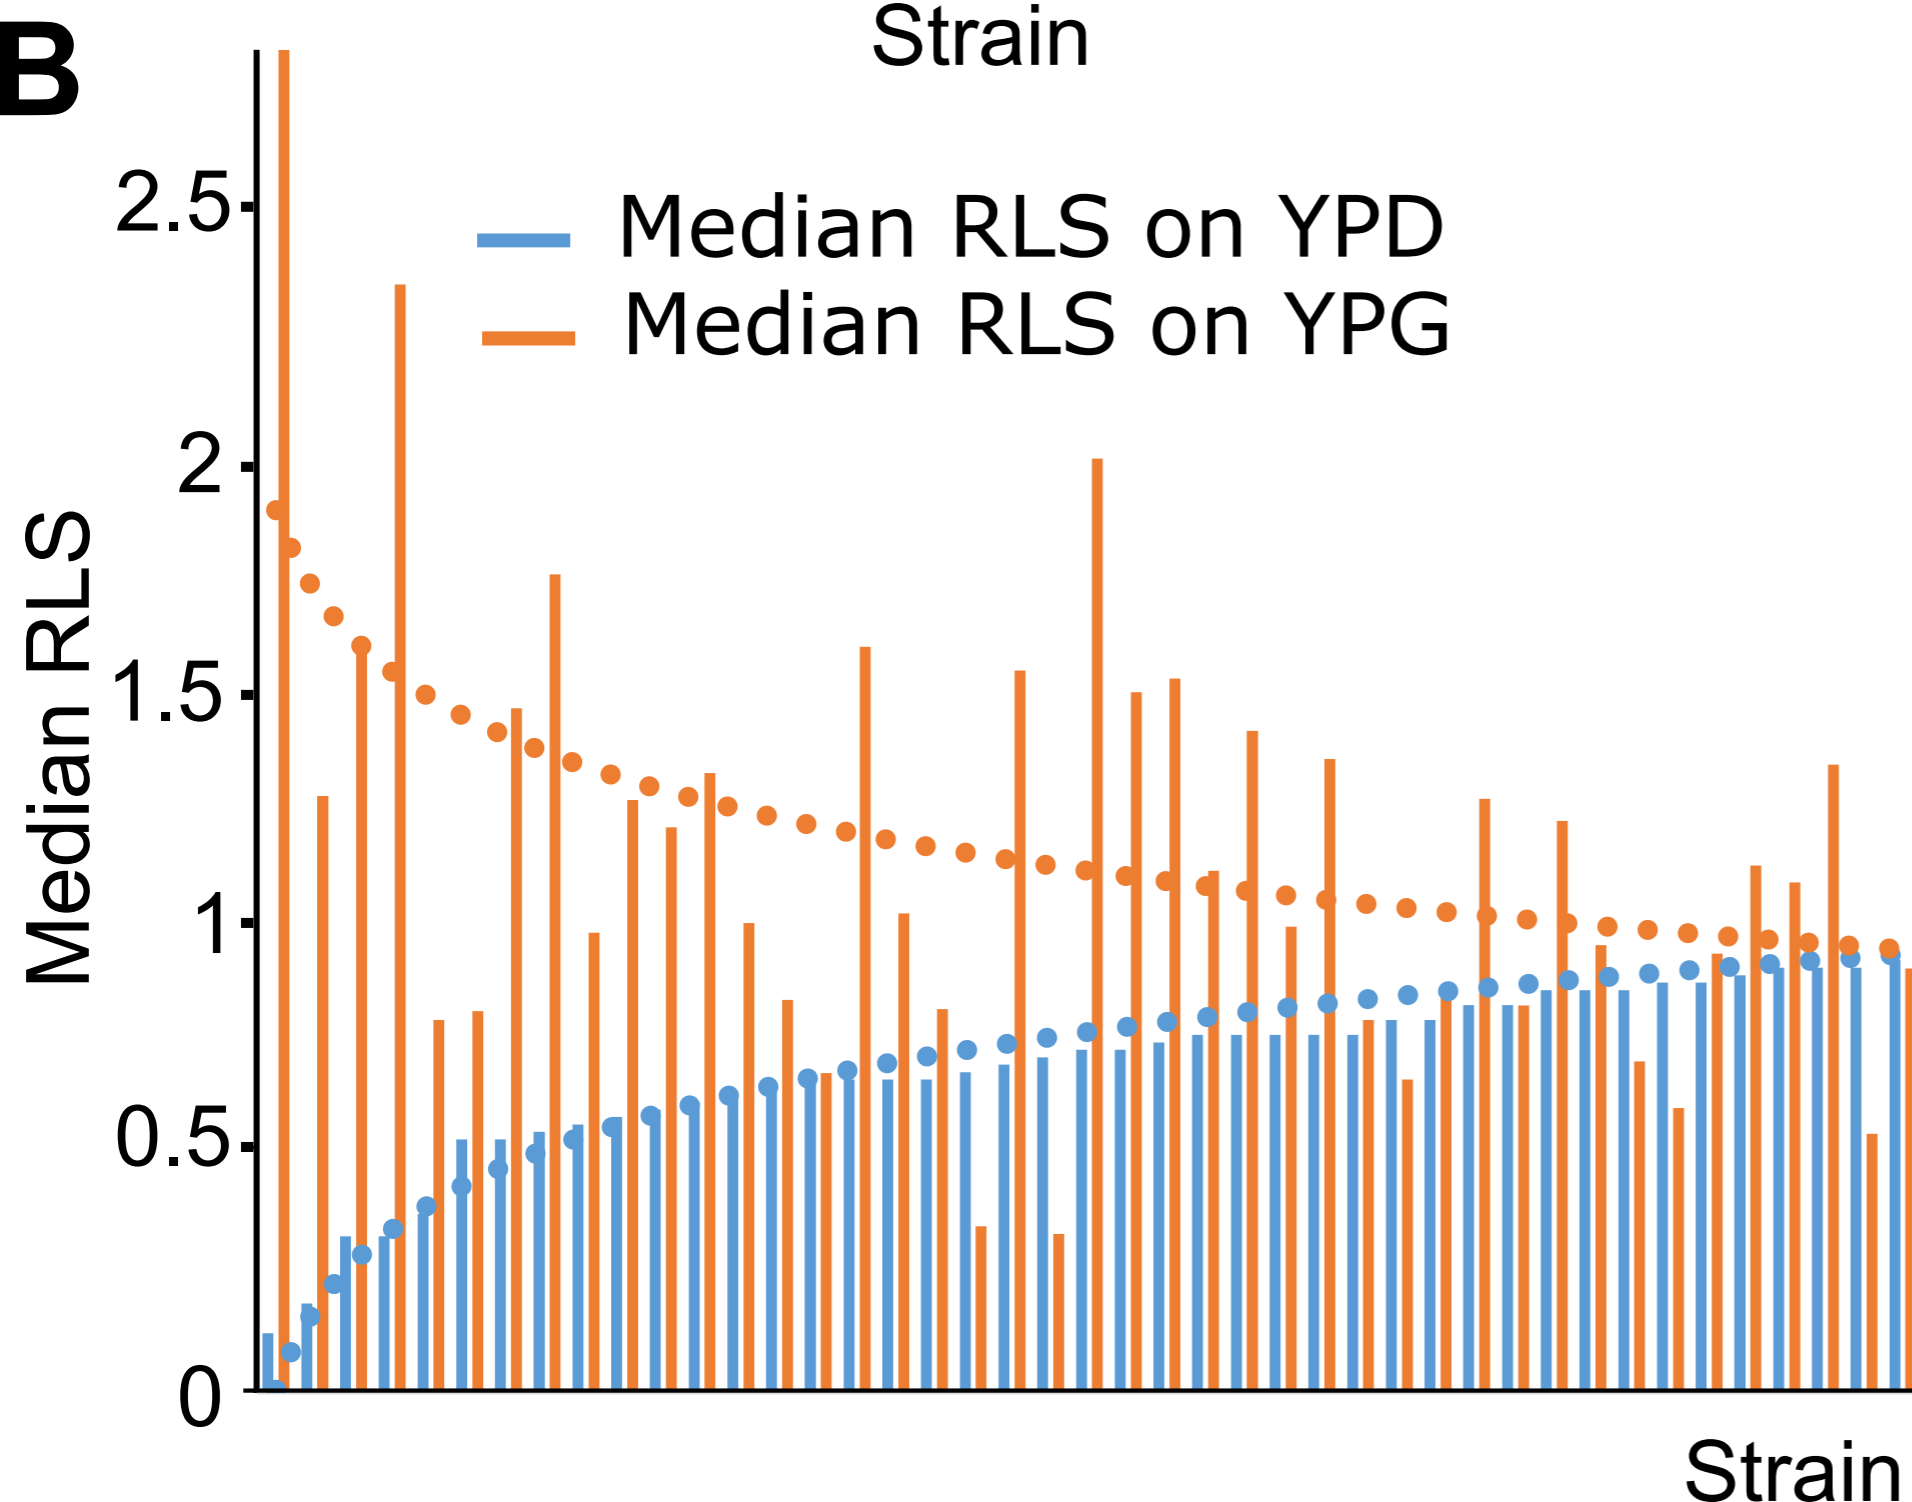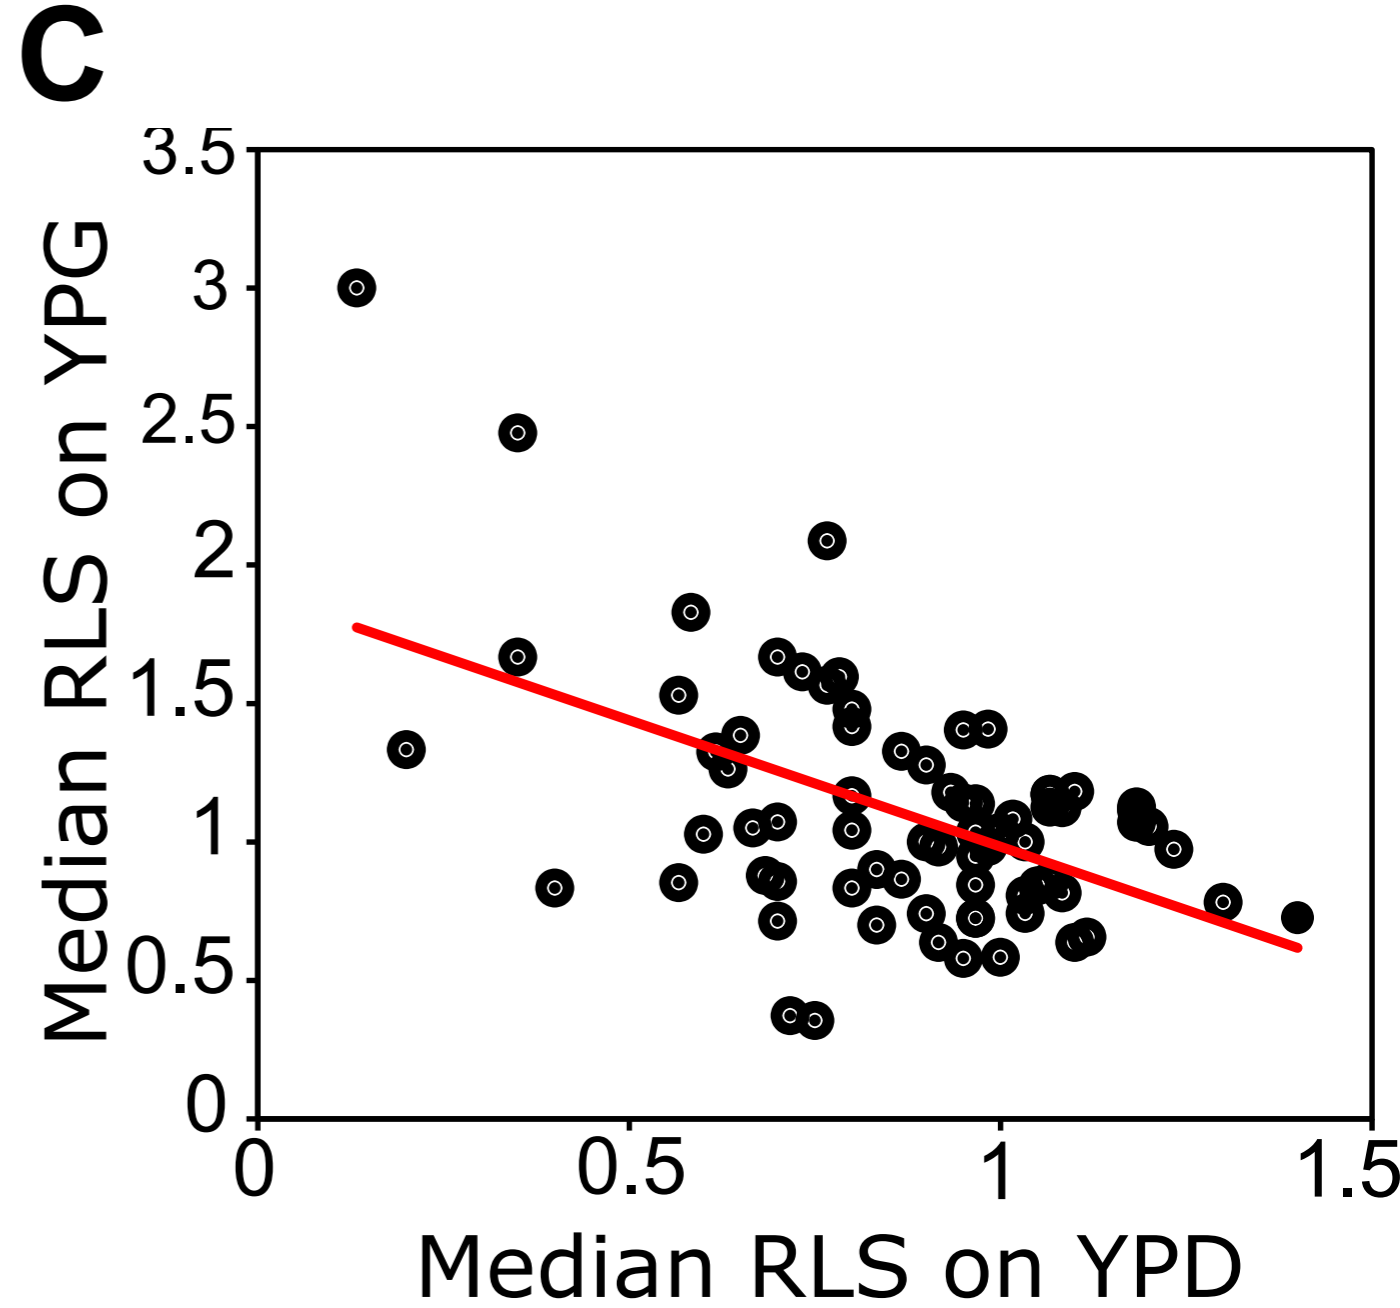

Supplement: supp [file elife_poa_e64860_Figure_1_figure_supplement_1.pdf › elife_poa_e64860_Figure_1_figure_supplement_1.pdf]

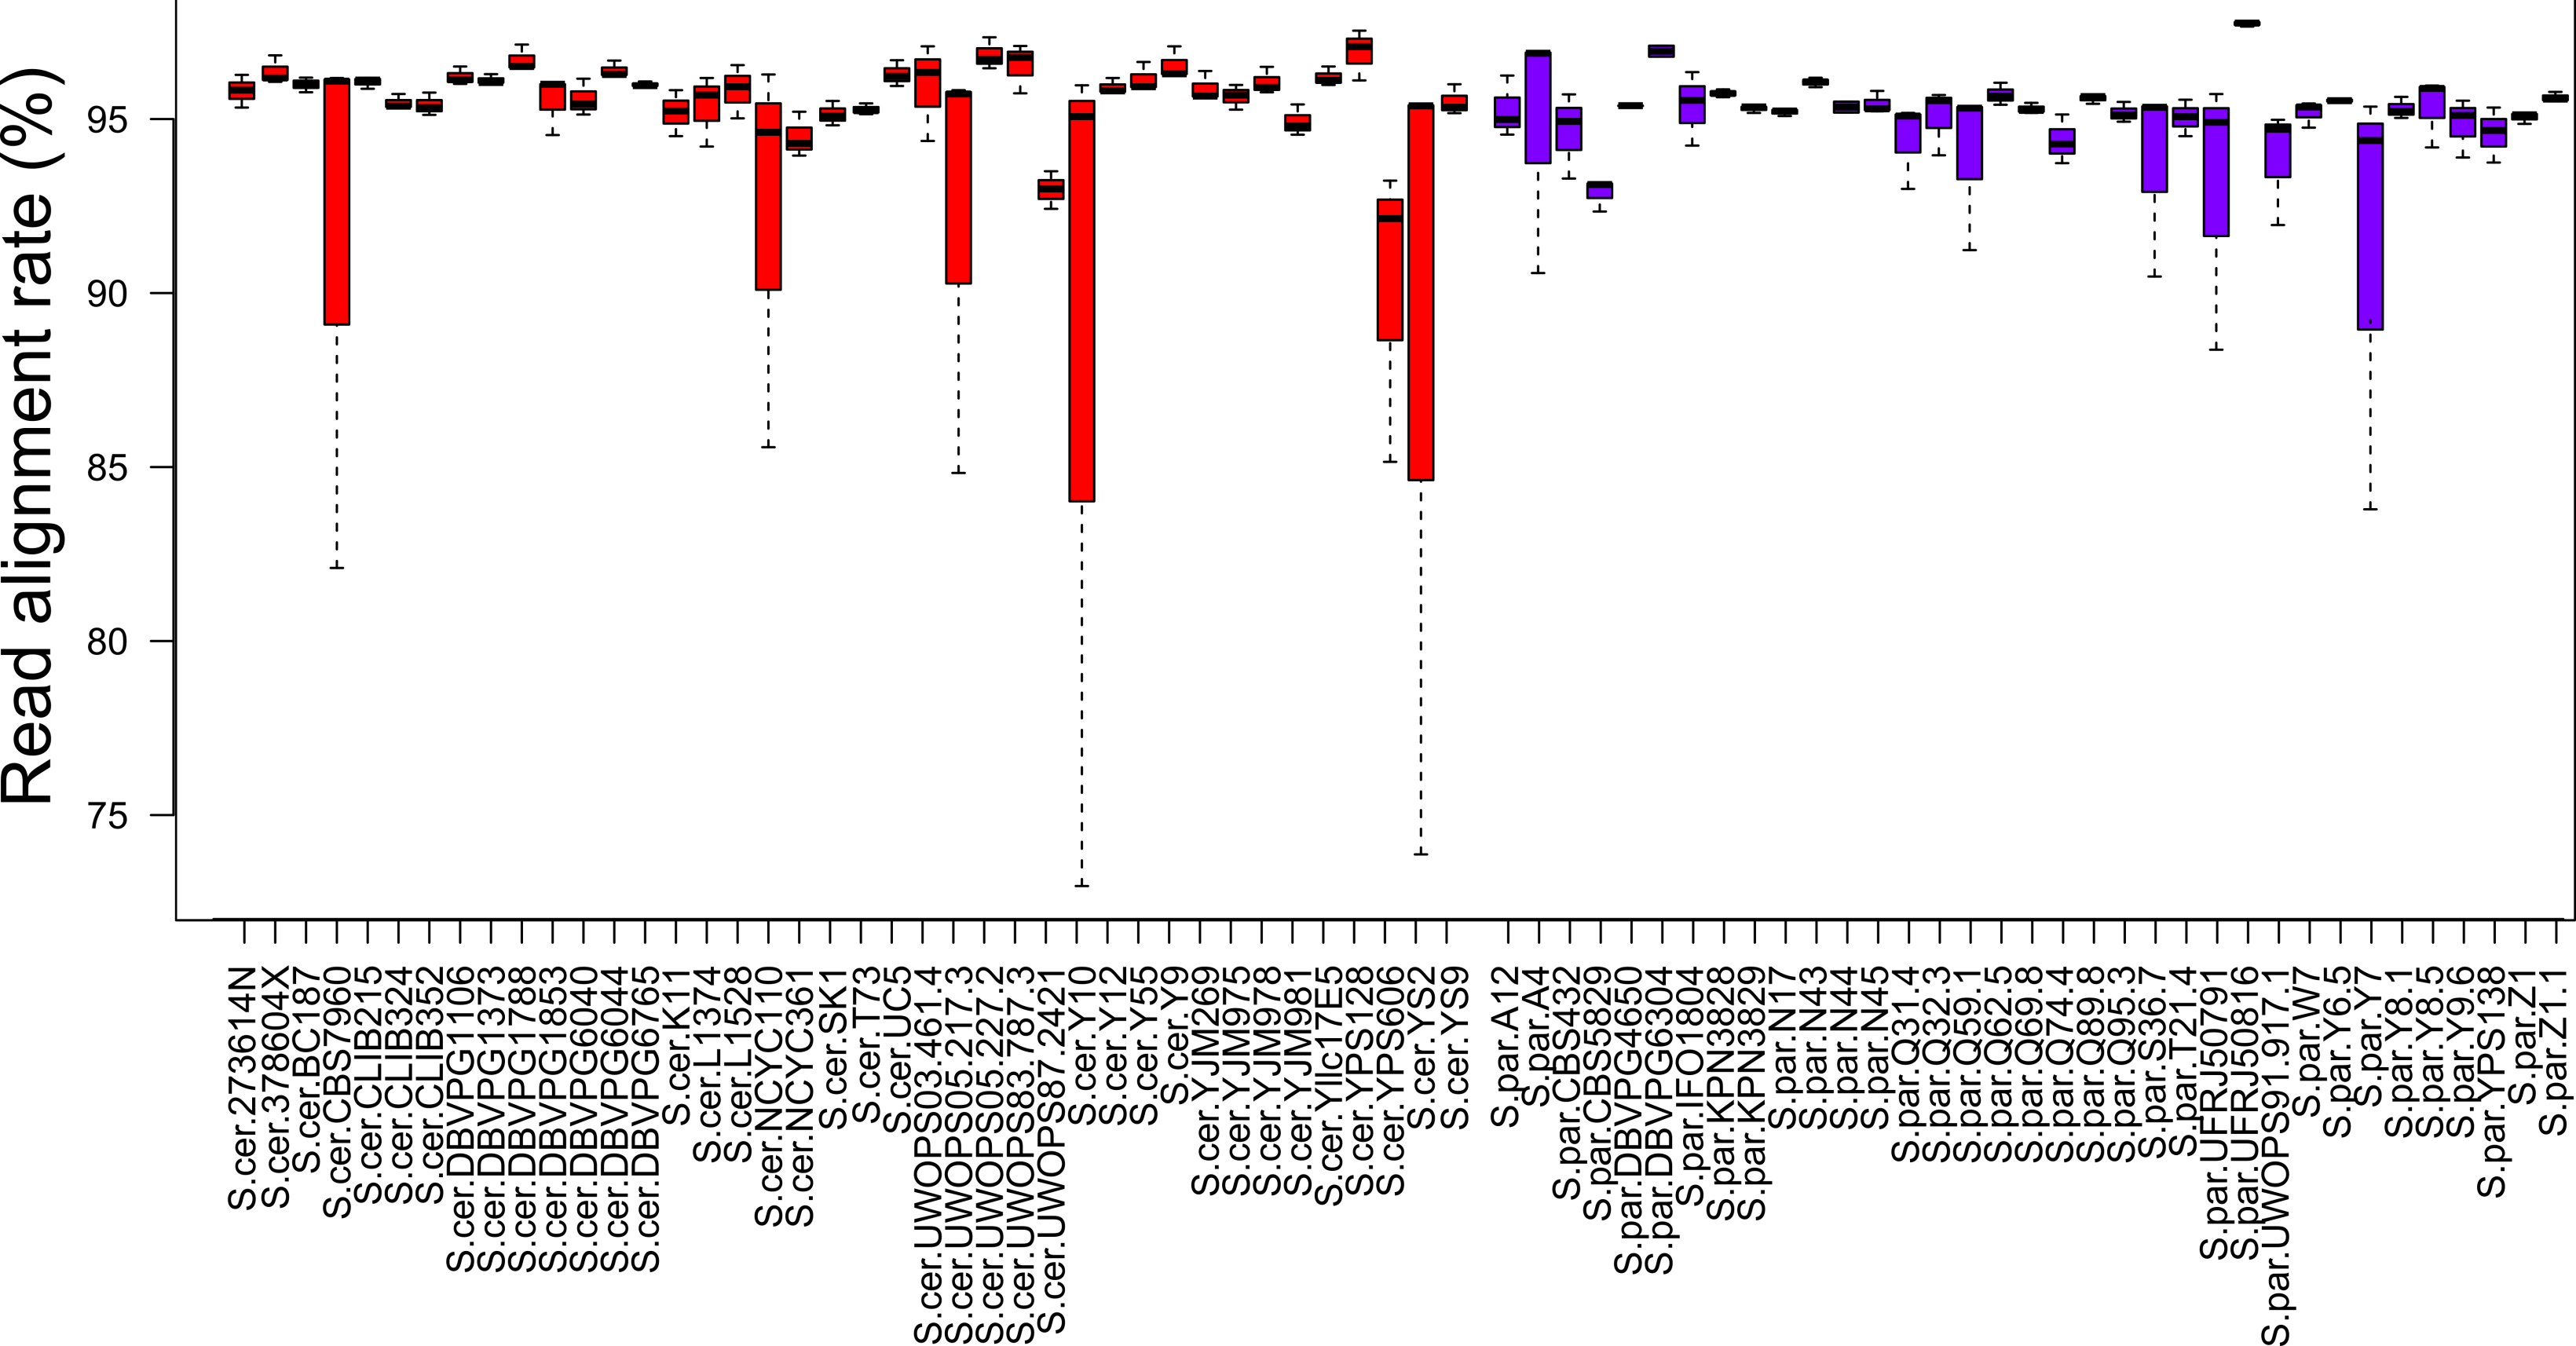

Supplement: supp [file elife_poa_e64860_Figure_2_figure_supplement_1.pdf › elife_poa_e64860_Figure_2_figure_supplement_1.pdf]

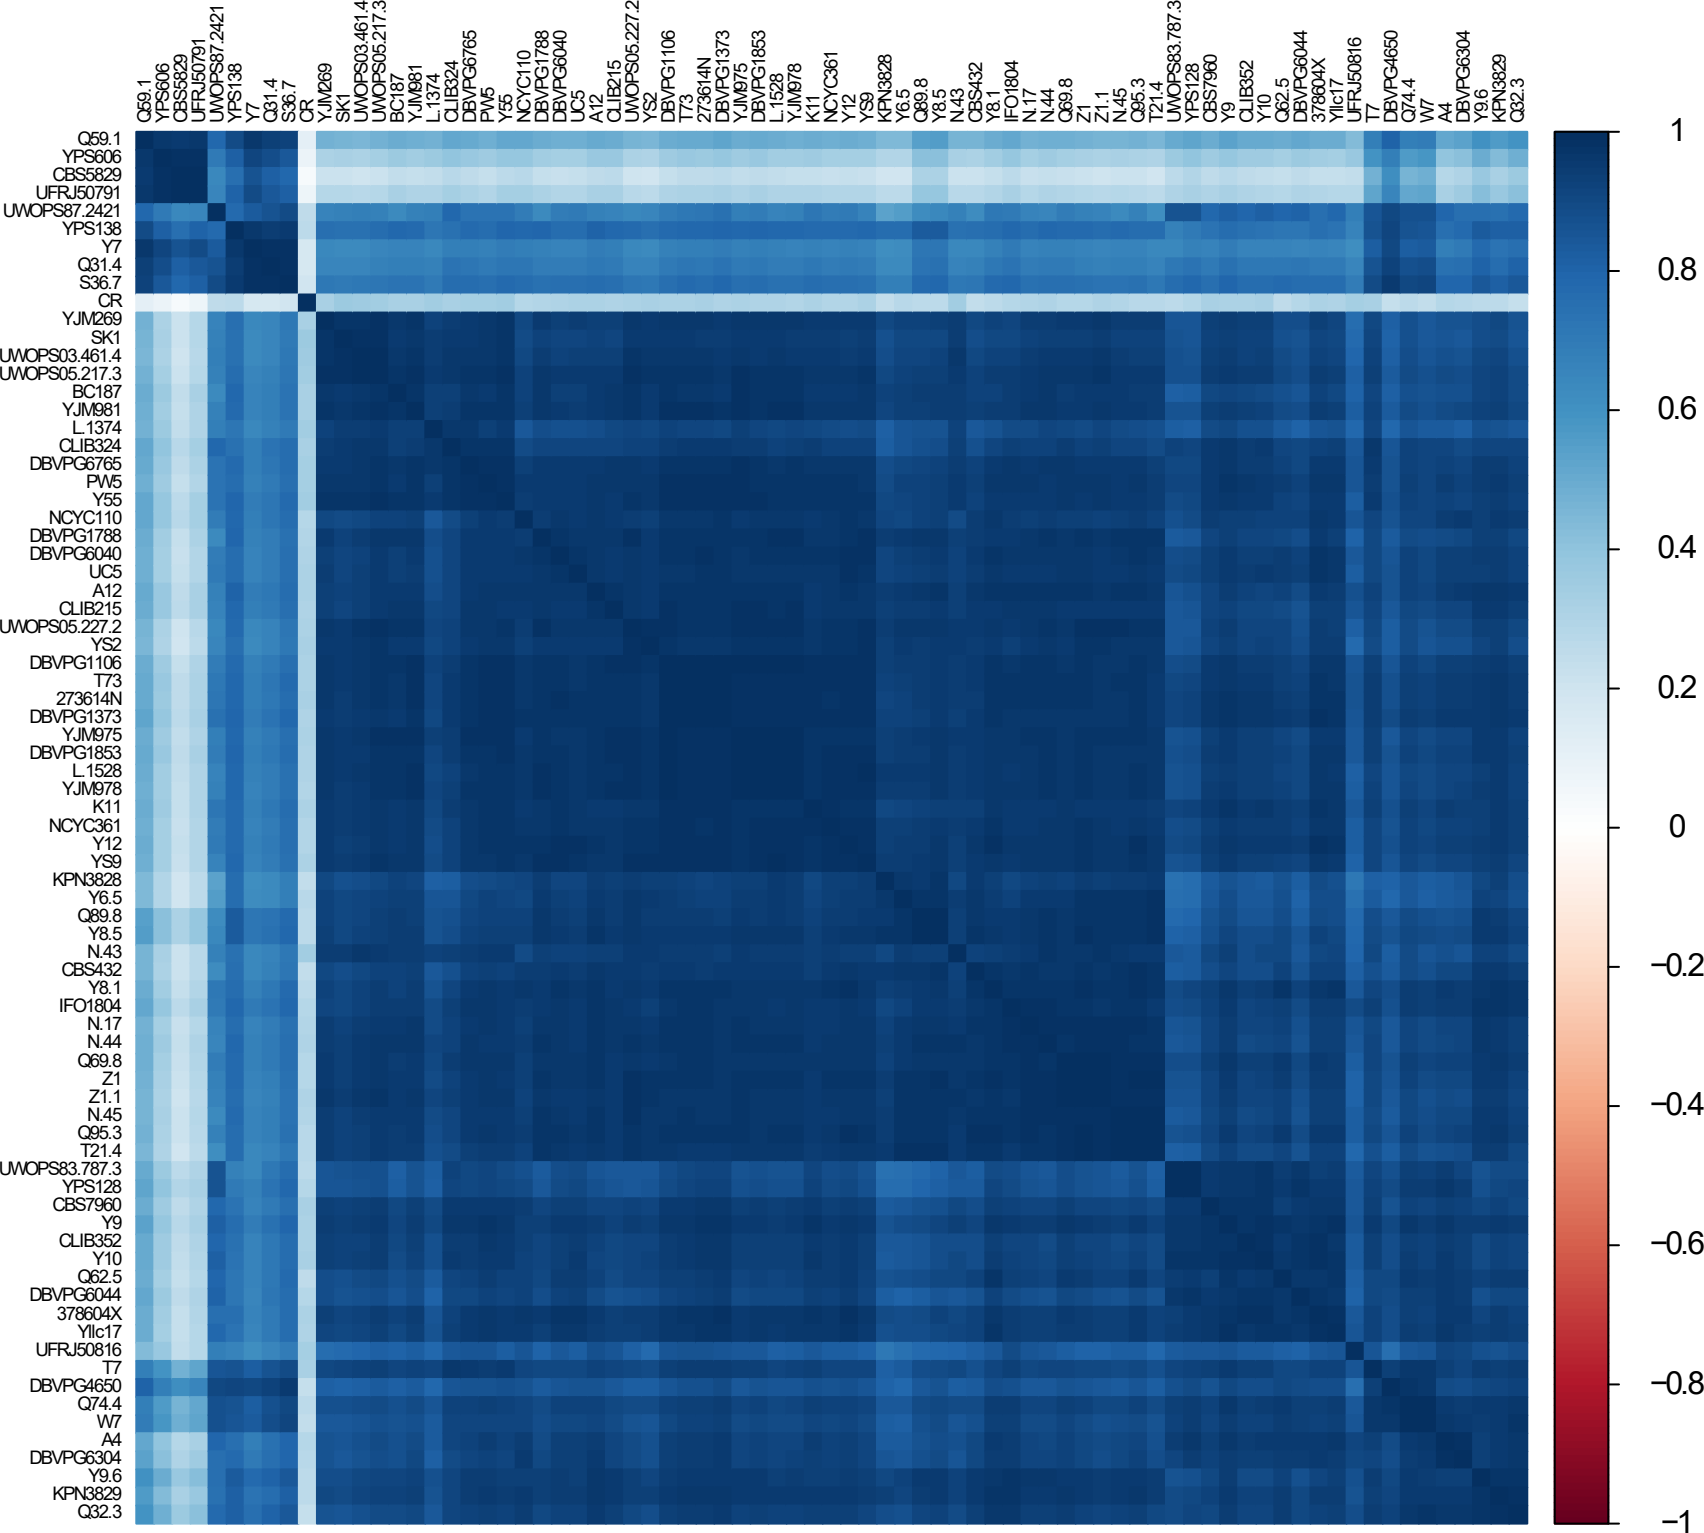

Supplement: supp [file elife_poa_e64860_Figure_2_figure_supplement_2.pdf › elife_poa_e64860_Figure_2_figure_supplement_2.pdf]

**A**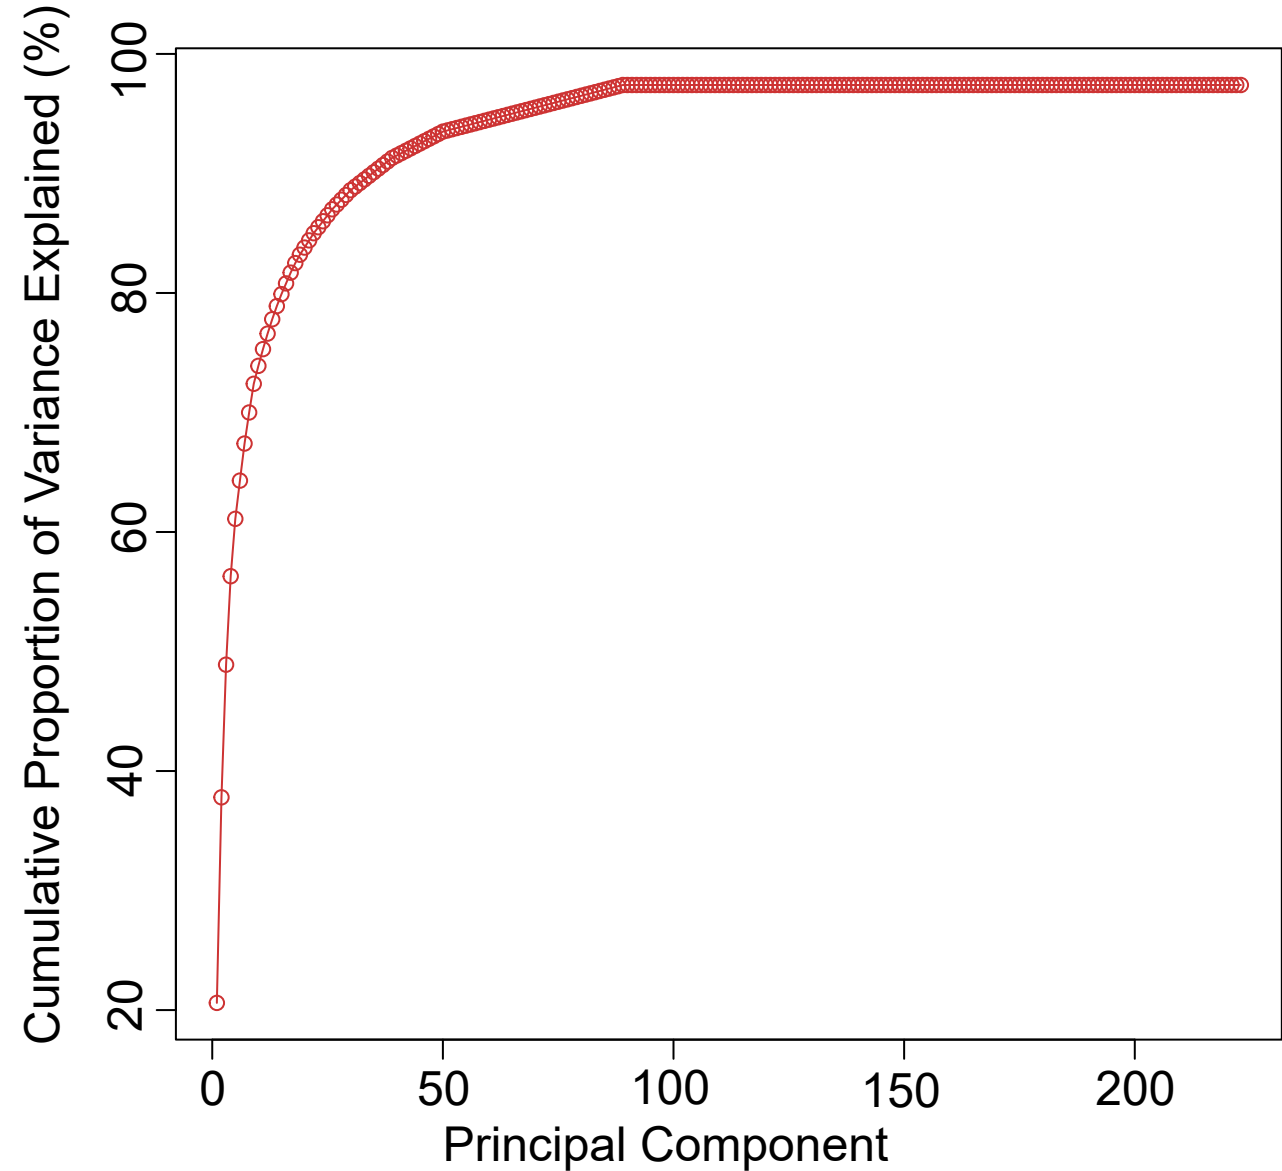**B**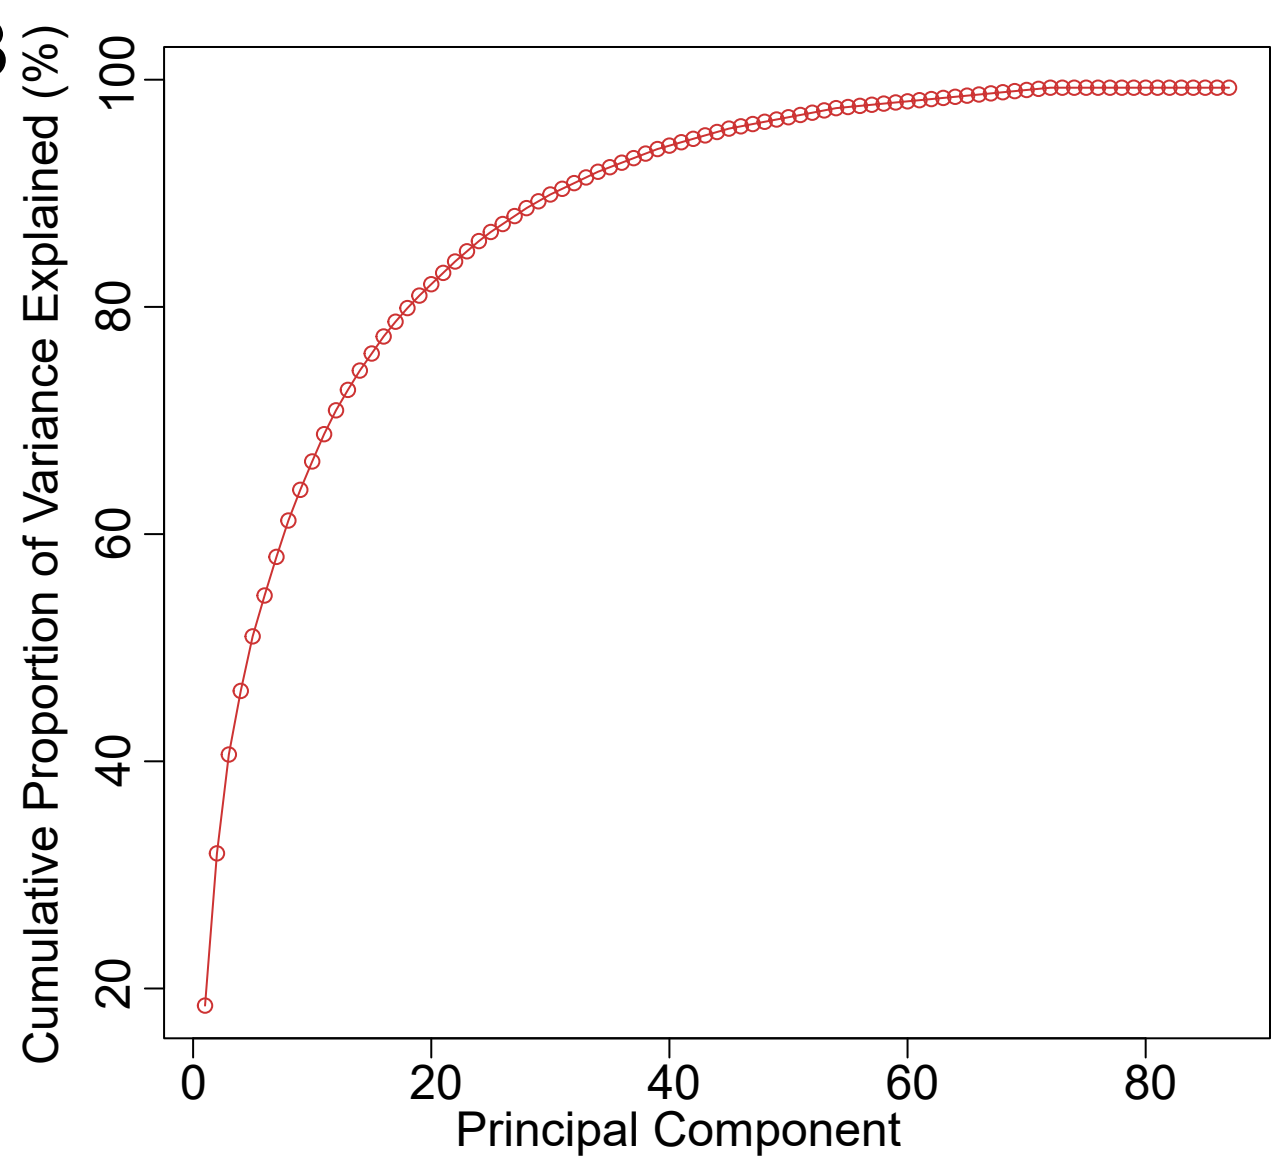

Supplement: supp [file elife_poa_e64860_Figure_2_figure_supplement_3.pdf › elife_poa_e64860_Figure_2_figure_supplement_3.pdf]

**A**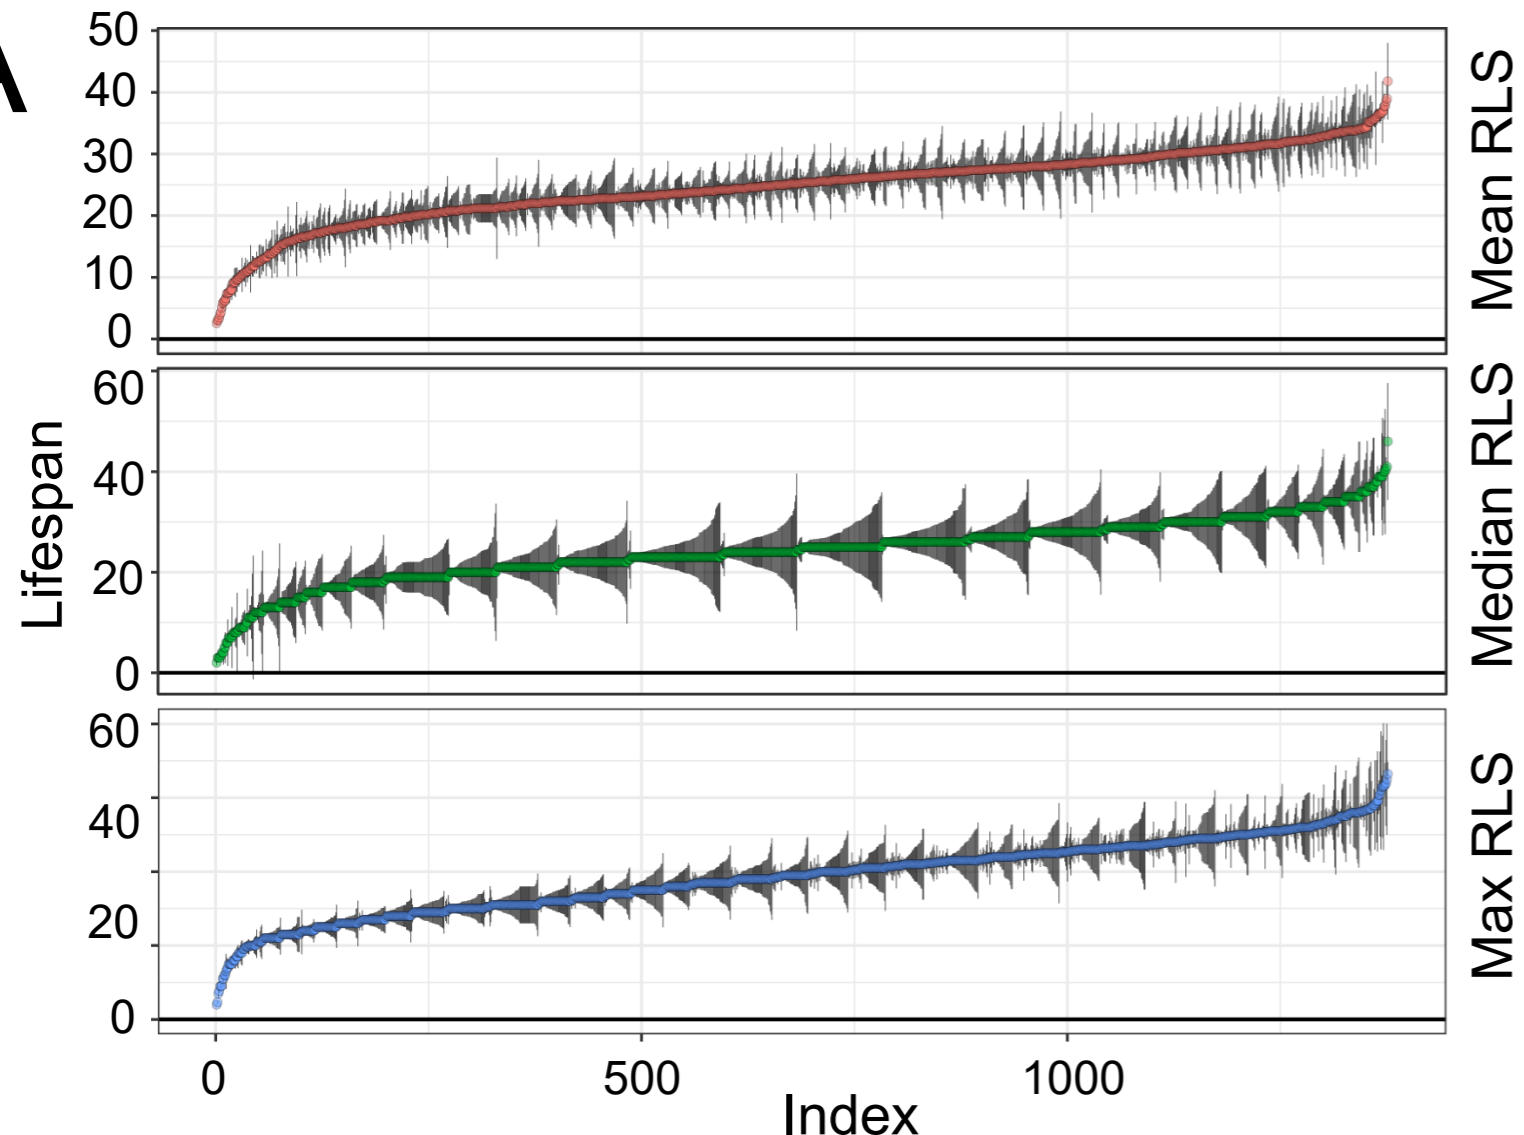**B**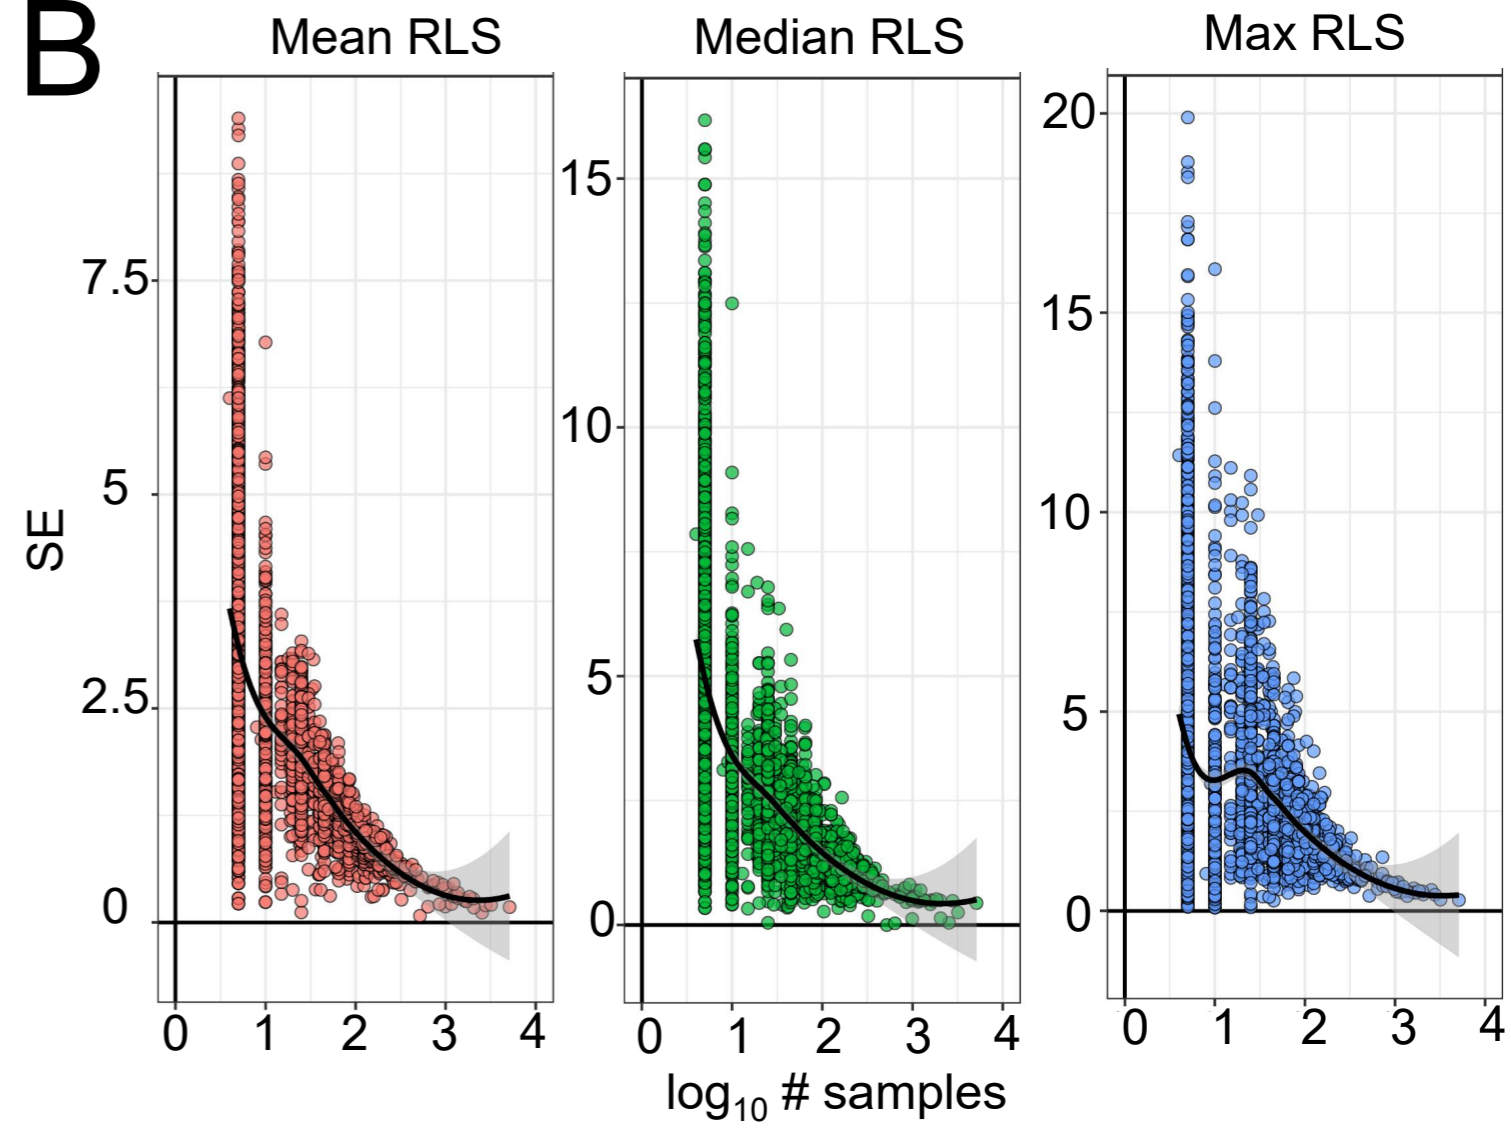

Supplement: supp [file elife_poa_e64860_Figure_4_figure_supplement_1.pdf › elife_poa_e64860_Figure_4_figure_supplement_1.pdf]

LYS20

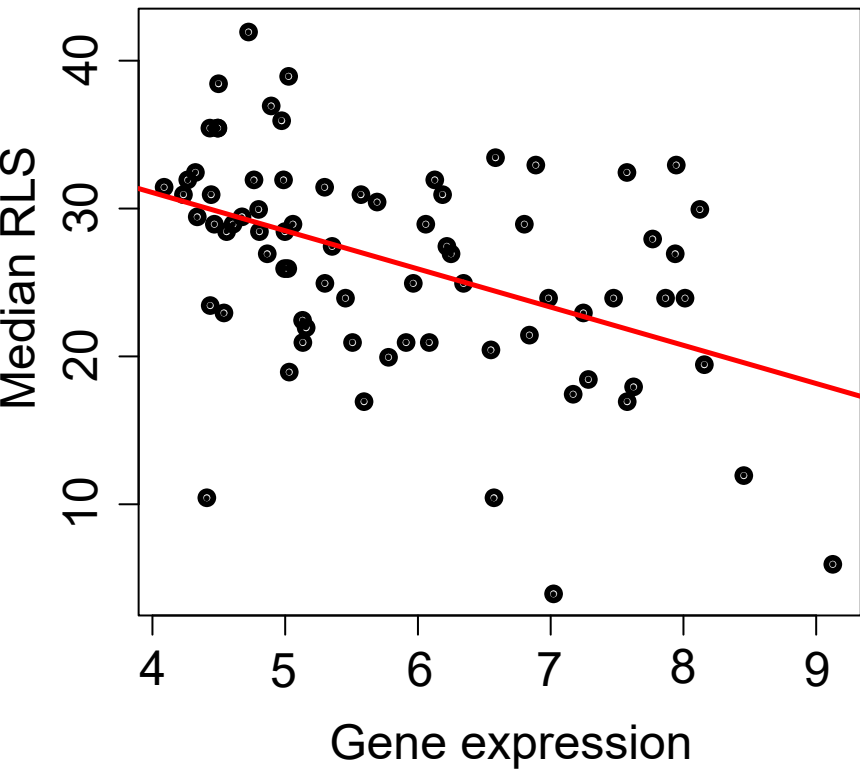

LYS21

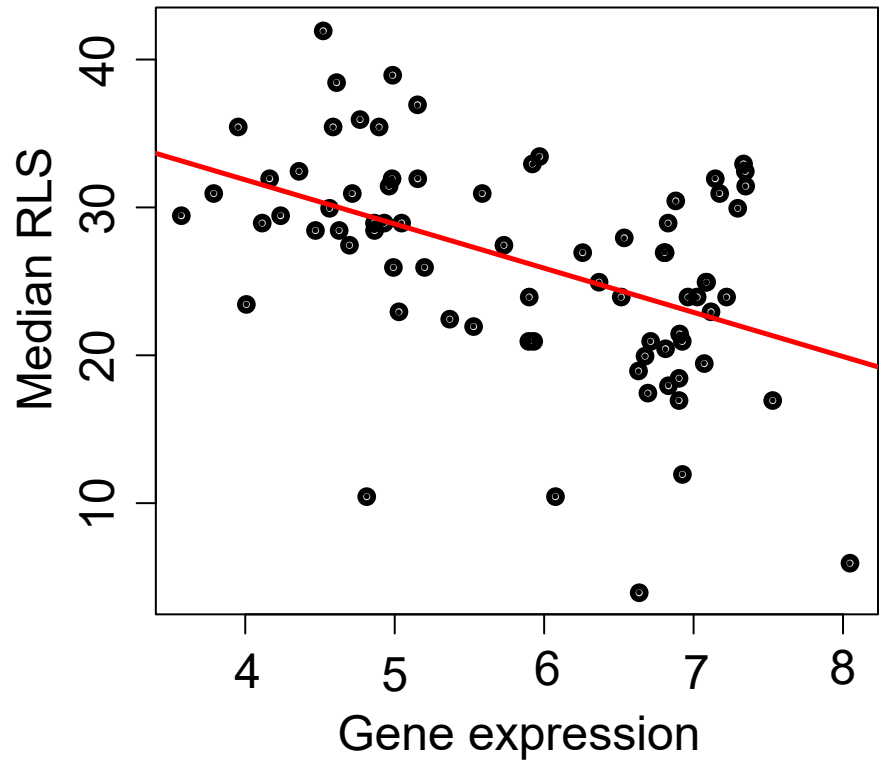

Supplement: supp [file elife_poa_e64860_Figure_5_figure_supplement_1.pdf › elife_poa_e64860_Figure_5_figure_supplement_1.pdf]

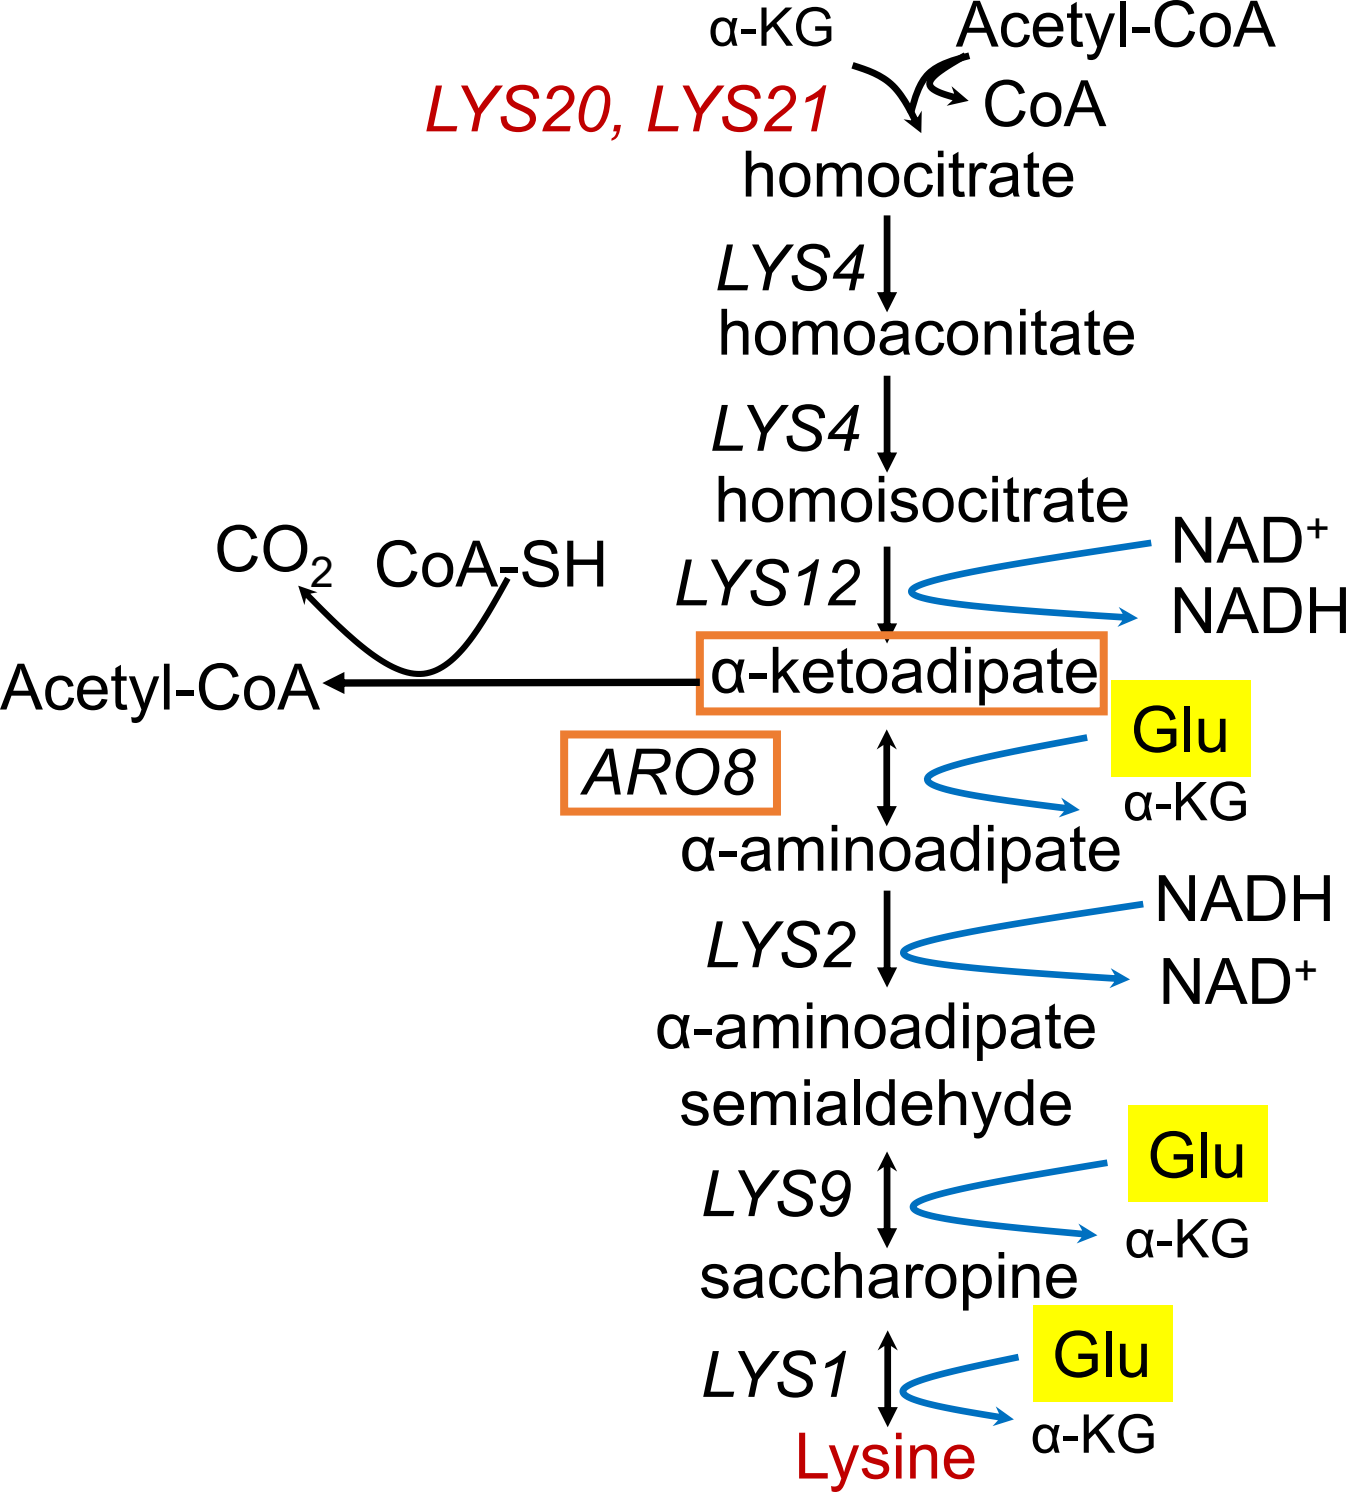

Supplement: supp [file elife_poa_e64860_Figure_6_figure_supplement_2.pdf › elife_poa_e64860_Figure_6_figure_supplement_2.pdf]

# BCAA Biosynthesis

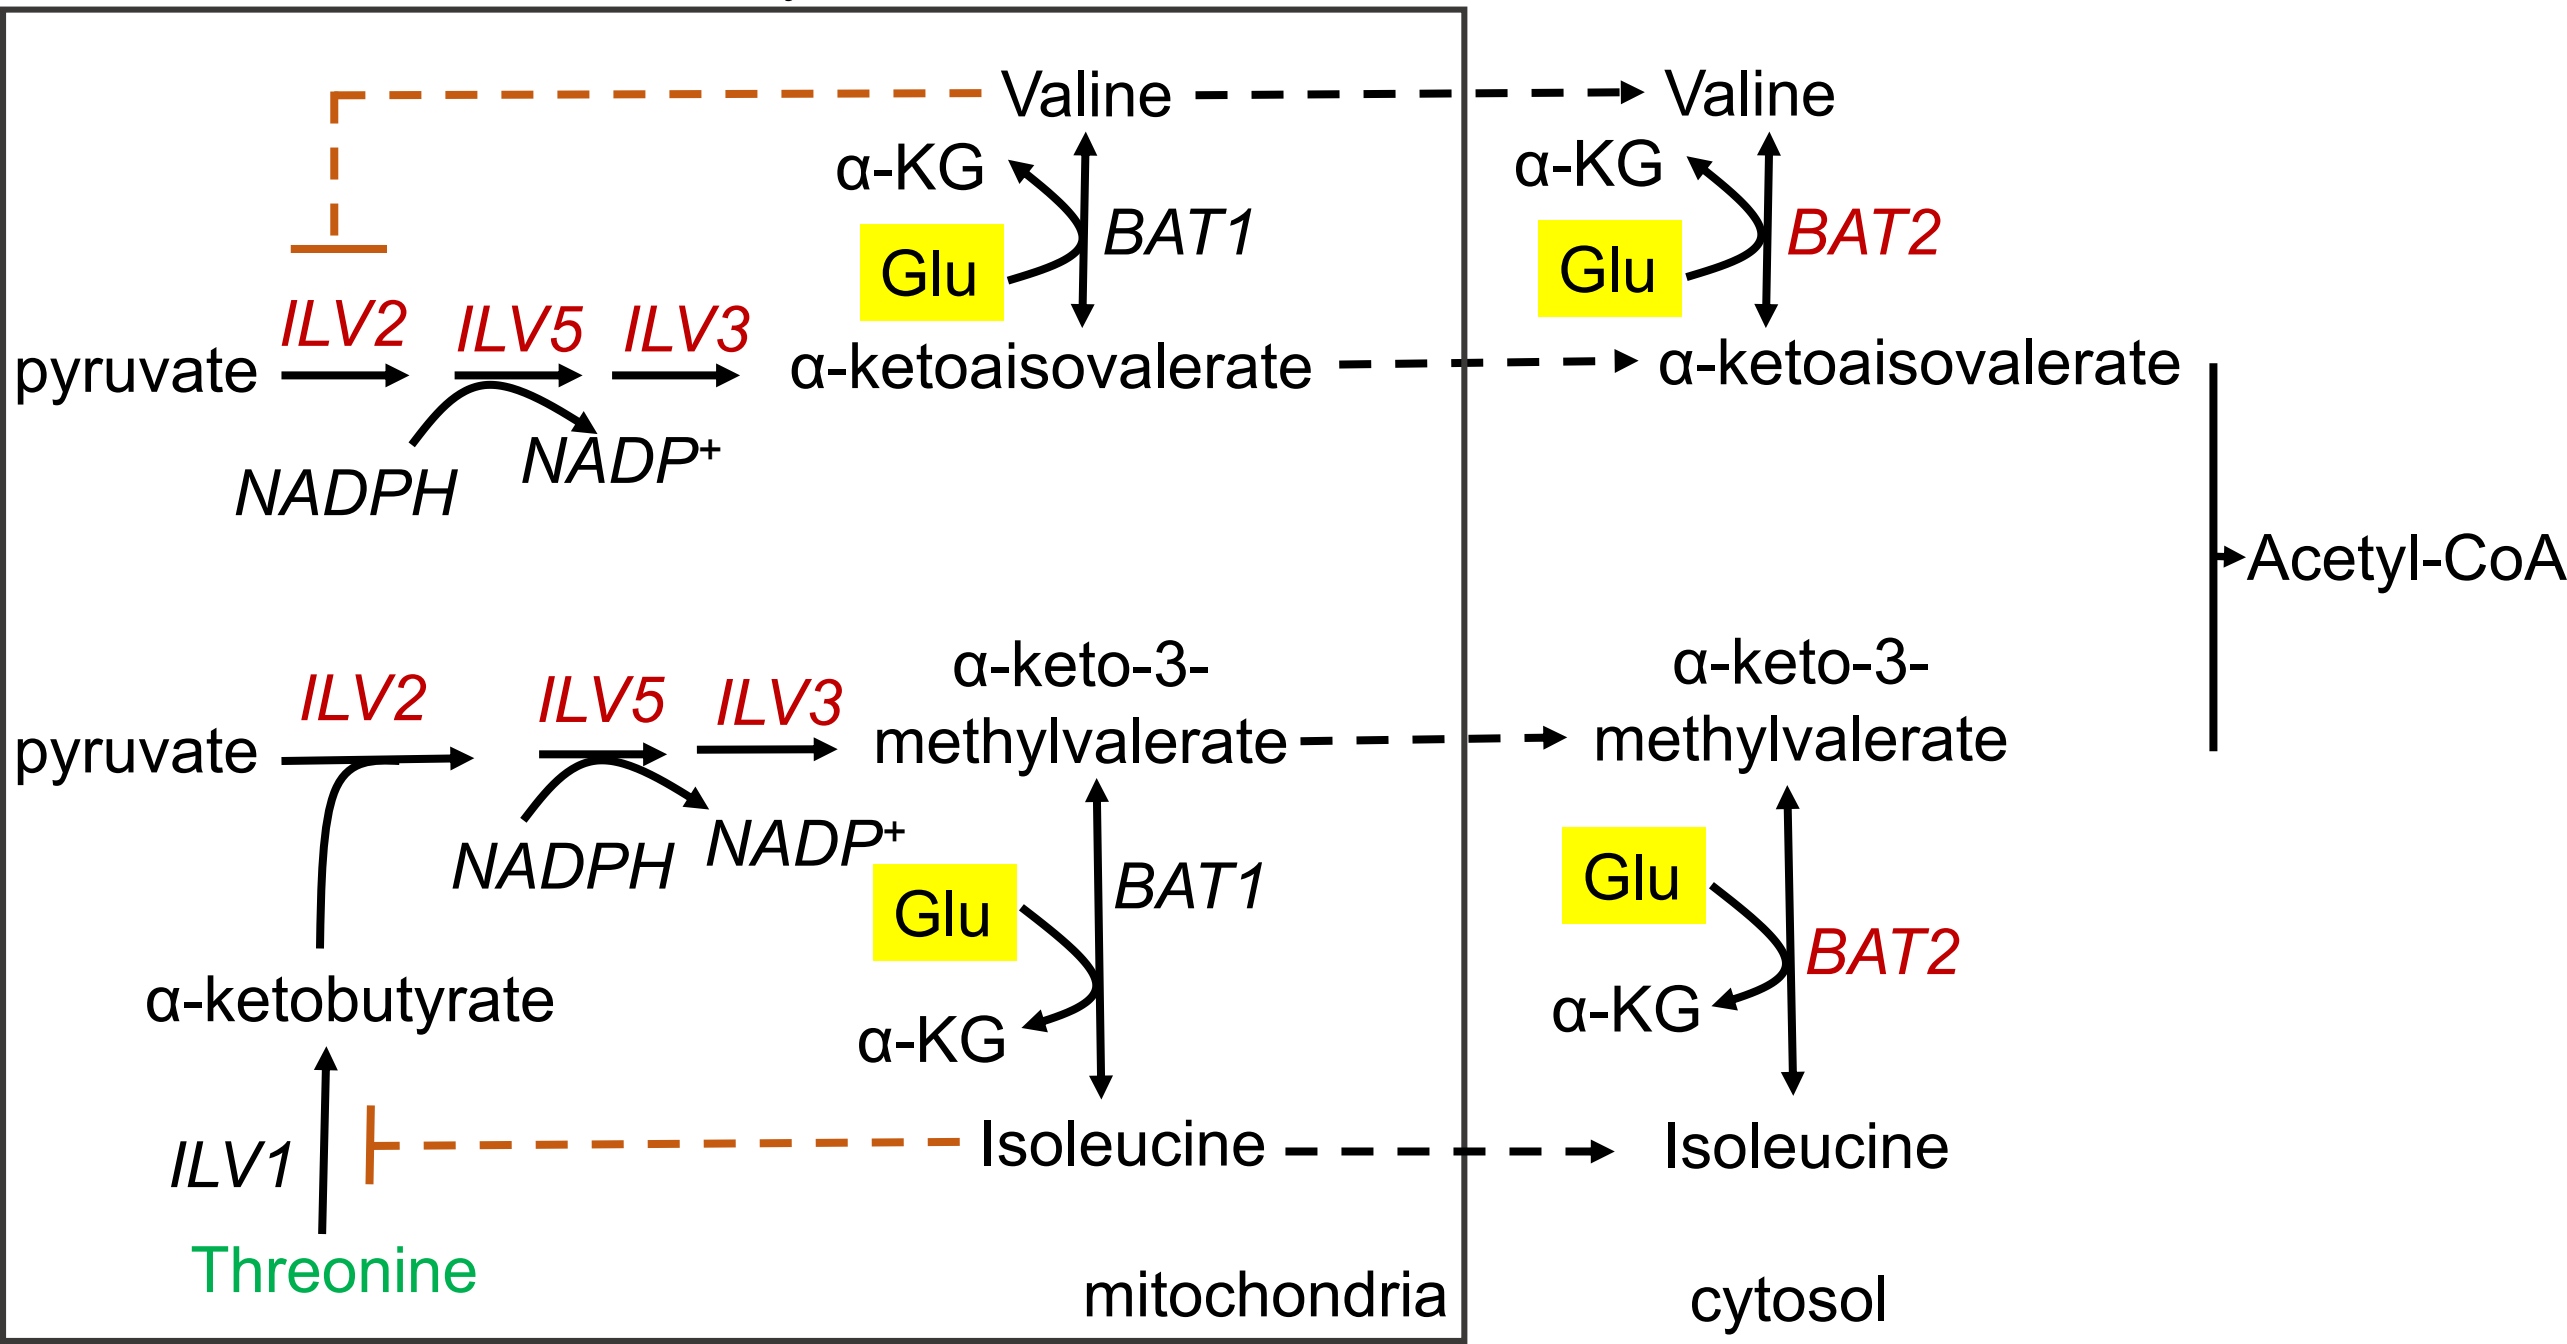

Supplement: supp [file elife_poa_e64860_Figure_6_figure_supplement_3.pdf › elife_poa_e64860_Figure_6_figure_supplement_3.pdf]

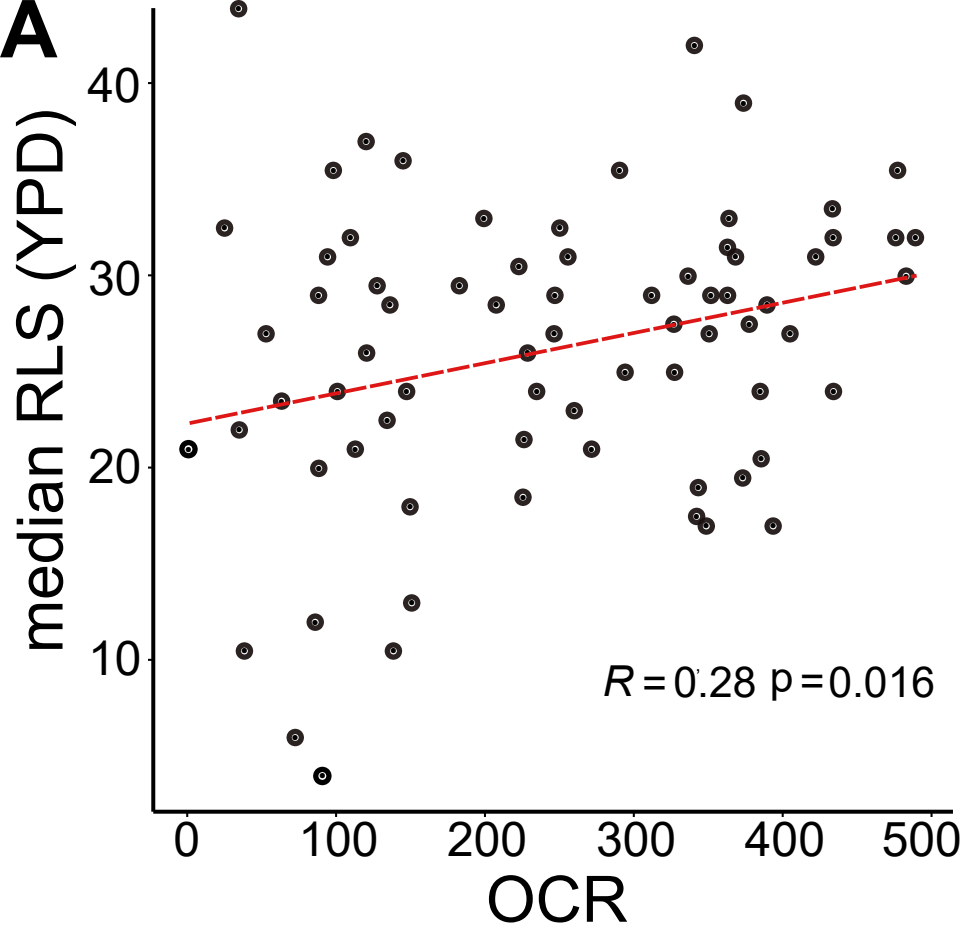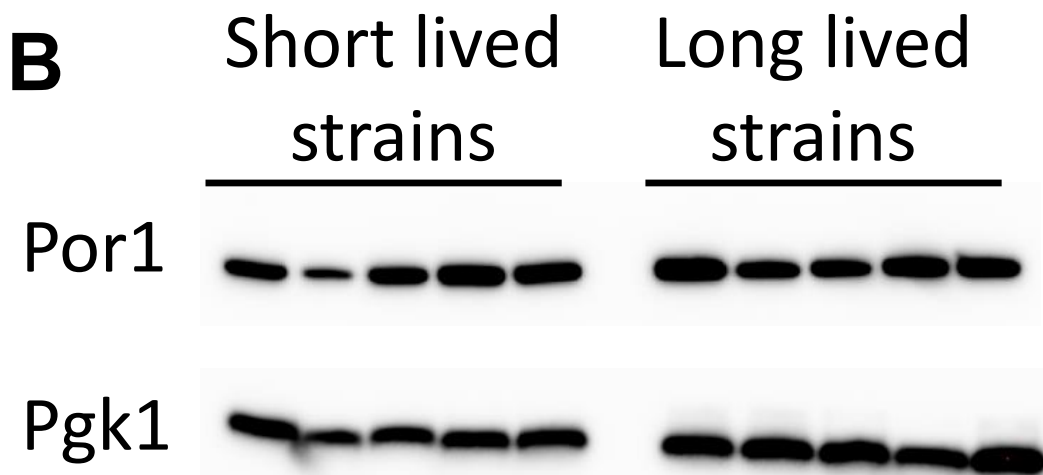

Supplement: supp [file elife_poa_e64860_Figure_6_figure_supplement_4.pdf › elife_poa_e64860_Figure_6_figure_supplement_4.pdf]

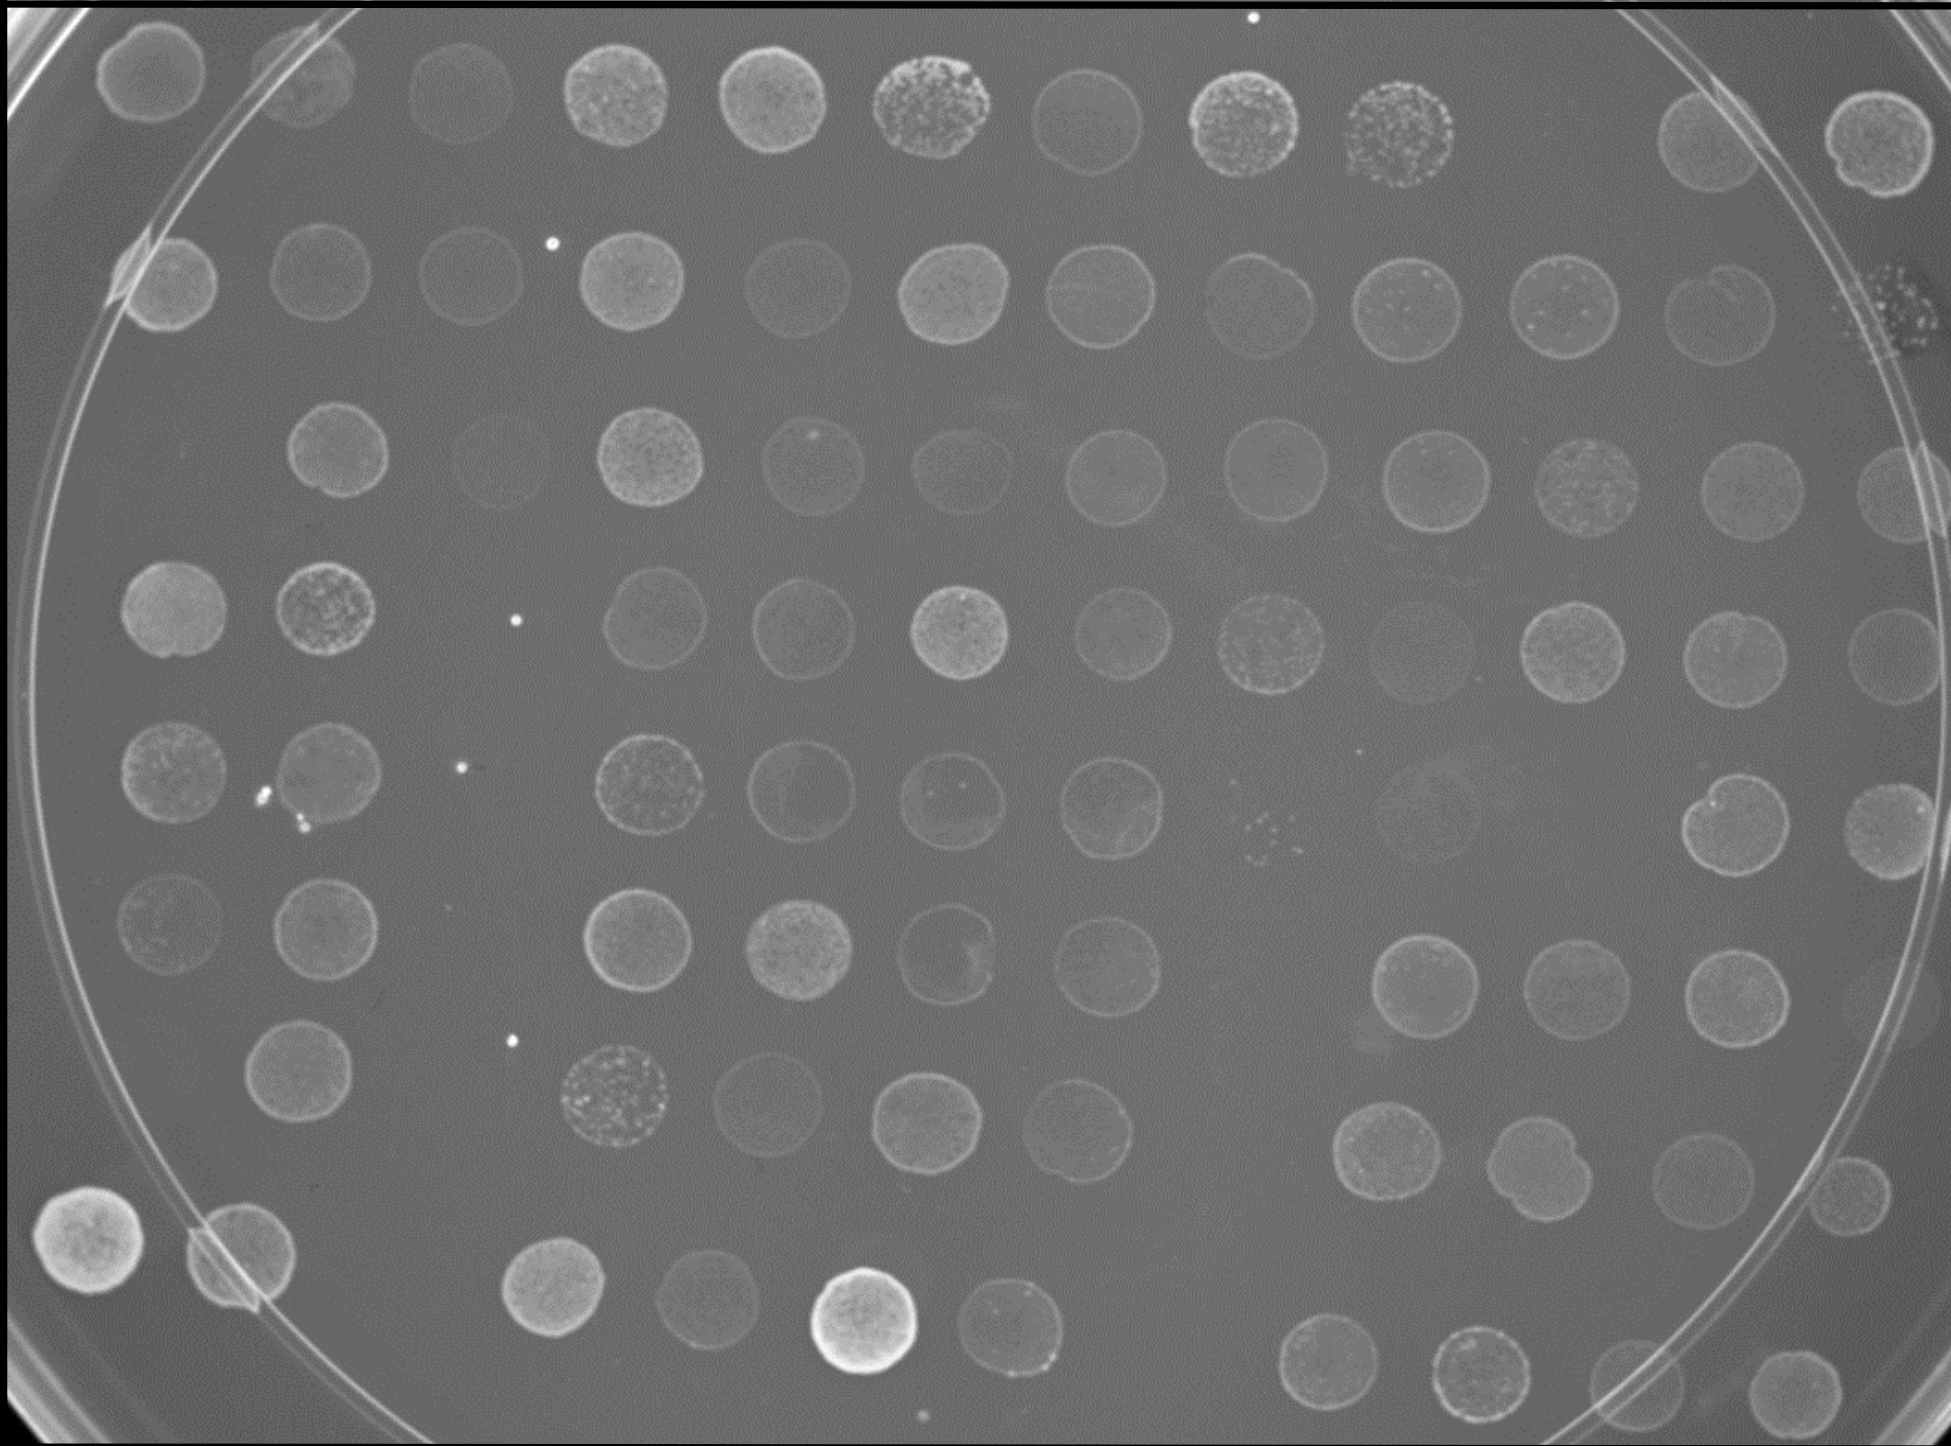

YP

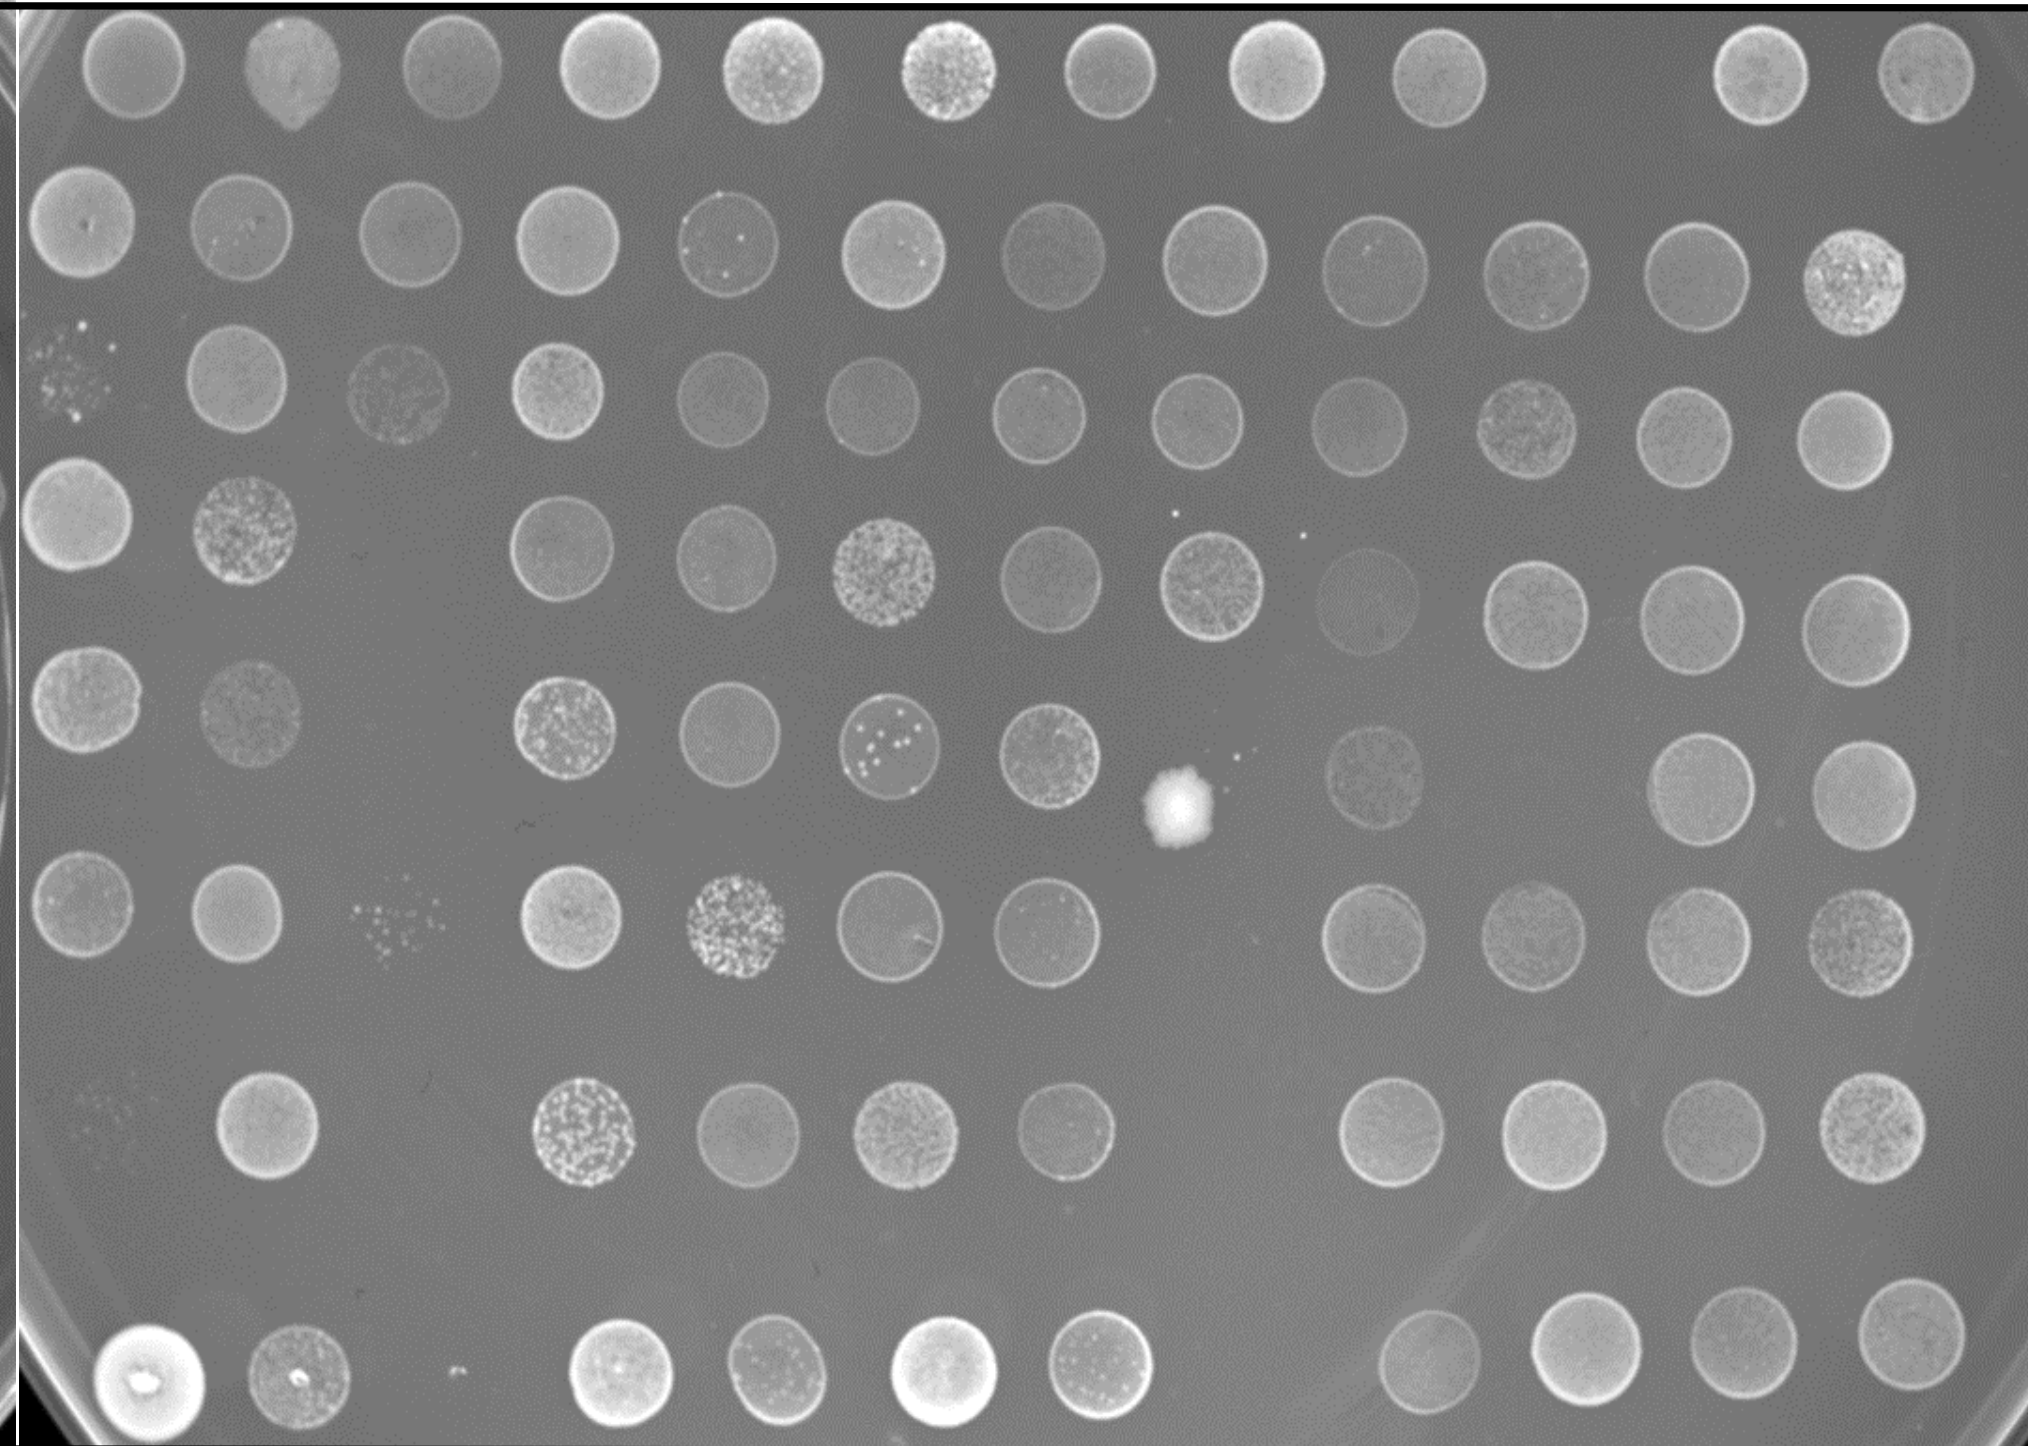

YP+ $\alpha$ -KG

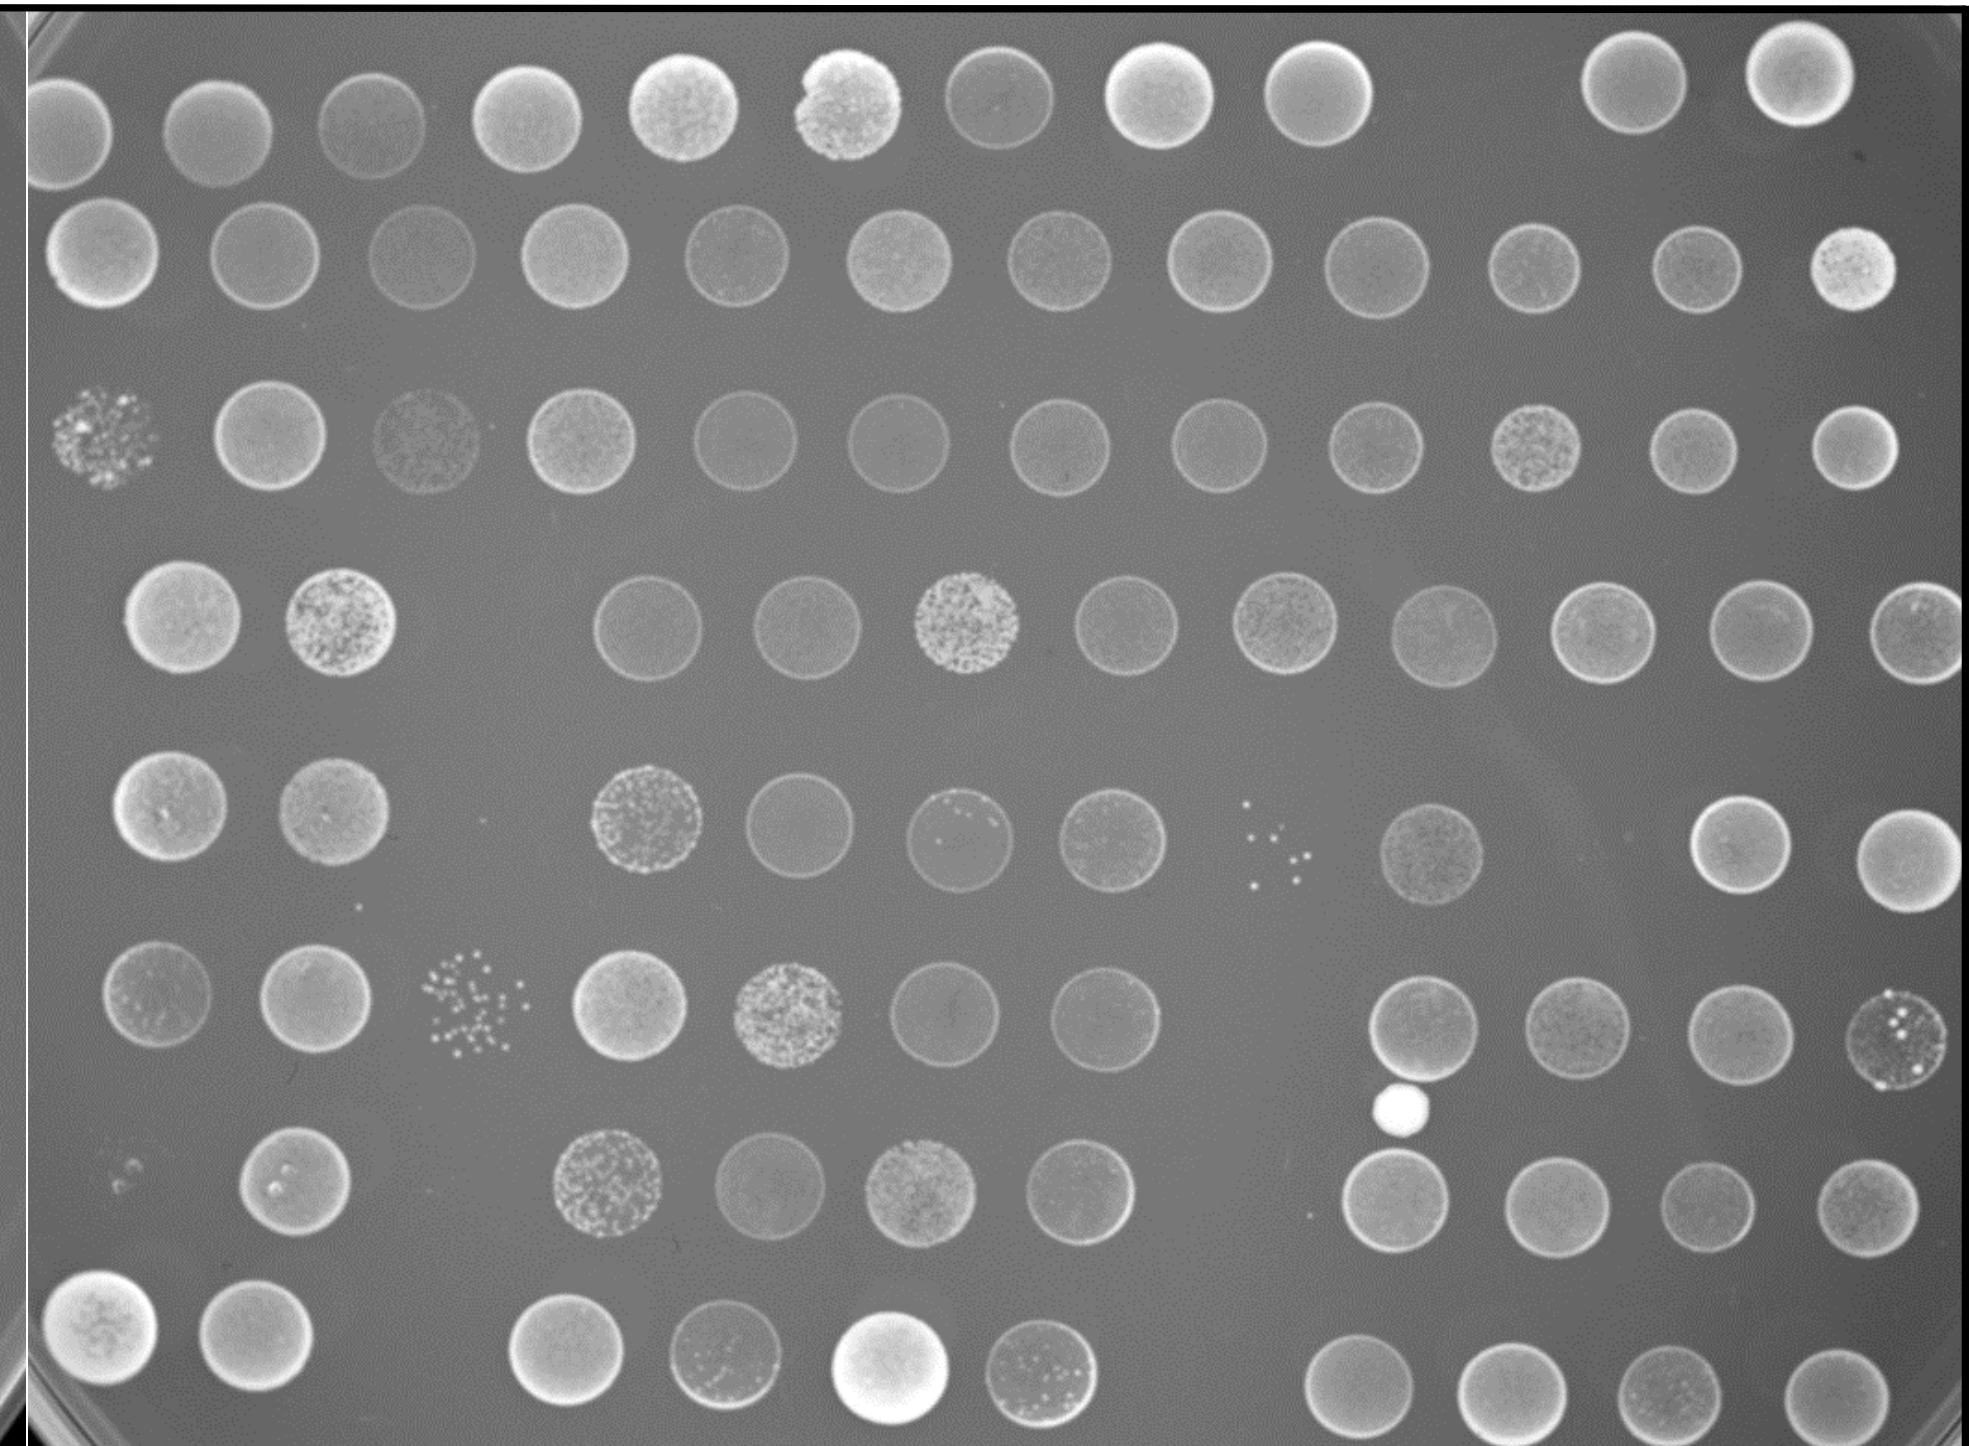

YP+  $\alpha$ -KG + Glu

Supplement: supp [file elife_poa_e64860_Figure_8_figure_supplement_1.pdf › elife_poa_e64860_Figure_8_figure_supplement_1.pdf]
